# Supplementary material for: A functional TOC complex contributes to gravity signal transduction in Arabidopsis
Source: Front Plant Sci. 2014 Apr 22;5:148. doi: 10.3389/fpls.2014.00148 (PMC4001062; doi:10.3389/fpls.2014.00148)
Supplement: Supplementary file 1 [file DataSheet1.XLSX]

## Sheet: Trial 1
Locus	Name	Sequence	Charge	ObsMass	Score	error(ppm)	numID	numQuant	bestCorr	numOccurInProteome	14N Peak Area	15N Peak Area	aveRatio(linear) (N14/N15 areas)	sdRatio(linear)	WT Label
AT1G01050.1	AtPPa1 (Arabidopsis thaliana pyrophosphorylase 1); inorganic diphosphatase	R.TLCEDNDPIDVLVIMQEPVLPGCFLR.A	3	3042.51	31.22	6.08054	1	1	0.96	2	3651215	4834443	0.76	0	14N
AT1G01050.1	AtPPa1 (Arabidopsis thaliana pyrophosphorylase 1); inorganic diphosphatase	R.ILYSSVVYPHNYGFVPR.T	3	2010.05	28.24	5.02477	1	1	0.86	2	6619036	10160755	0.65	0	14N
AT1G01050.1	AtPPa1 (Arabidopsis thaliana pyrophosphorylase 1); inorganic diphosphatase	K.EVAVNDFLPSESAVEAIQ*YSMDLYAEYILHTLR.R	3	3787.87	29.13	7.90775	1	1	0.93	1	471267	510973	0.92	0	14N
AT1G01050.1	AtPPa1 (Arabidopsis thaliana pyrophosphorylase 1); inorganic diphosphatase	R.ILYSSVVYPHNYGFVPR.T	3	2010.05	30.59	2.78601	1	1	0.98	2	9037658	7264416	1.24	0	15N
AT1G01090.1	PDH-E1 ALPHA (PYRUVATE DEHYDROGENASE E1 ALPHA); pyruvate dehydrogenase (acetyl-transferring)	R.SQLLENVFADPK.G	2	1359.72	61.27	6.61905	1	1	0.86	1	914343	966127	0.95	0	14N
AT1G01100.1	60S acidic ribosomal protein P1 (RPP1A)	R.NVTDLIMNVGAGGGGGAPVAAAAPAAGGGAAAAPAAEEK.K	3	3301.67	57.23	6.42104	2	2	0.88	1	2903957	3277830	0.89	0	14N
AT1G01100.1	60S acidic ribosomal protein P1 (RPP1A)	R.NVTDLIMNVGAGGGGGAPVAAAAPAAGGGAAAAPAAEEK.K	3	3302.66	71.42	2.6488	1	1	0.98	1	3807752	3181588	1.2	0	15N
AT1G01100.1	60S acidic ribosomal protein P1 (RPP1A)	K.AAGVSIESYWPMLFAK.M	2	1768.92	25.4	12.6633	1	1	0.96	2	6119659	5441710	1.12	0	15N
AT1G01620.1	PIP1C (PLASMA MEMBRANE INTRINSIC PROTEIN 1C); water channel	R.DSHVPILAPLPIGFAVFLVHLATIPITGTGINPAR.S	4	3617.09	27.35	8.10051	1	1	0.8	8	12442656	15420358	0.81	0	14N
AT1G01620.1	PIP1C (PLASMA MEMBRANE INTRINSIC PROTEIN 1C); water channel	R.DSHVPILAPLPIGFAVFLVHLATIPITGTGINPAR.S	4	3619.06	21.49	-1.55076	1	1	0.86	8	5188983	4565687	1.14	0	15N
AT1G01800.1	short-chain dehydrogenase/reductase (SDR) family protein	K.AQIAEAGAPTDISK.I	2	1370.72	59.04	2.91819	1	1	0.67	2	219026	397927	0.55	0	14N
AT1G01800.1	short-chain dehydrogenase/reductase (SDR) family protein	K.AQIAEAGAPTDISK.I	2	1370.72	58	2.99115	1	1	0.7	2	300128	349439	0.86	0	15N
AT1G02130.1	ARA-5 (ARABIDOPSIS RAS 5); GTP binding	K.LQIWDTAGQER.F	2	1315.66	53.38	2.50825	1	1	0.95	20	2995589	3523515	0.85	0	14N
AT1G02130.1	ARA-5 (ARABIDOPSIS RAS 5); GTP binding	K.LQIWDTAGQER.F	2	1315.66	65.48	1.97619	1	1	0.95	20	3414807	2505820	1.36	0	15N
AT1G02500.1	SAM1 (S-ADENOSYLMETHIONINE SYNTHETASE 1); methionine adenosyltransferase	R.FVIGGPHGDAGLTGR.K	2	1452.76	44.01	2.61572	1	1	0.73	4	2278773	3315616	0.69	0	14N
AT1G02500.1	SAM1 (S-ADENOSYLMETHIONINE SYNTHETASE 1); methionine adenosyltransferase	K.TQVTVEYYNDKGAMVPIR.V	3	2083.06	24.81	6.91294	1	1	0.77	1	2673637	4837757	0.55	0	14N
AT1G02500.1	SAM1 (S-ADENOSYLMETHIONINE SYNTHETASE 1); methionine adenosyltransferase	K.TIFHLNPSGR.F	3	1140.62	33.66	4.90965	2	2	0.93	4	2581821	19086687	0.47	0.46669	14N
AT1G02500.1	SAM1 (S-ADENOSYLMETHIONINE SYNTHETASE 1); methionine adenosyltransferase	K.VLVNIEQQSPDIAQGVHGHFTK.C	3	2416.27	44.06	3.68338	1	1	0.83	2	2688027	3983639	0.67	0	14N
AT1G02500.1	SAM1 (S-ADENOSYLMETHIONINE SYNTHETASE 1); methionine adenosyltransferase	K.EHVIKPVIPEK.Y	3	1287.77	24.31	4.11566	1	1	0.95	2	1788226	2360088	0.76	0	14N
AT1G02500.1	SAM1 (S-ADENOSYLMETHIONINE SYNTHETASE 1); methionine adenosyltransferase	K.TIFHLNPSGR.F	3	1140.62	28.01	5.61102	2	2	0.95	4	28742193	23836209	1.21	0	15N
AT1G02500.1	SAM1 (S-ADENOSYLMETHIONINE SYNTHETASE 1); methionine adenosyltransferase	K.TNMVMVFGEITTK.A	2	1469.75	65.96	11.4306	1	1	0.35	3	7658529	5758802	1.33	0	15N
AT1G02500.1	SAM1 (S-ADENOSYLMETHIONINE SYNTHETASE 1); methionine adenosyltransferase	K.VLVNIEQQSPDIAQ*GVHGHFTK.C	4	2417.26	24.28	7.03281	1	1	0.94	2	23468174	27030413	0.87	0	15N
AT1G02500.1	SAM1 (S-ADENOSYLMETHIONINE SYNTHETASE 1); methionine adenosyltransferase	R.FVIGGPHGDAGLTGR.K	2	1452.76	51.75	2.27155	2	2	0.95	4	3211156	3348808	1.01	0.0707107	15N
AT1G02500.1	SAM1 (S-ADENOSYLMETHIONINE SYNTHETASE 1); methionine adenosyltransferase	K.VLVNIEQQSPDIAQGVHGHFTK.C	3	2416.27	30.55	3.3109	2	2	0.98	2	3493842	3369418	1.09	0.0707107	15N
AT1G02500.1	SAM1 (S-ADENOSYLMETHIONINE SYNTHETASE 1); methionine adenosyltransferase	K.TQVTVEYYNDK.G	2	1358.65	50.72	7.36028	1	1	0.79	1	1518544	1152491	1.32	0	15N
AT1G02500.1	SAM1 (S-ADENOSYLMETHIONINE SYNTHETASE 1); methionine adenosyltransferase	K.EHVIKPVIPEK.Y	3	1287.77	23.75	5.59109	1	1	0.99	2	5302548	4648661	1.14	0	15N
AT1G02780.1	emb2386 (embryo defective 2386); structural constituent of ribosome	K.GPGGDVAPVAAPAPAATPAPTAAVPK.K	2	2250.22	37.37	3.86631	2	2	0.98	1	1874487	2168244	0.79	0.0989949	14N
AT1G02780.1	emb2386 (embryo defective 2386); structural constituent of ribosome	K.VWLDPNESSDISMANSR.Q	2	1919.88	72.67	4.63572	1	1	0.99	1	3490909	3593690	0.97	0	14N
AT1G02780.1	emb2386 (embryo defective 2386); structural constituent of ribosome	K.GPGGDVAPVAAPAPAATPAPTAAVPK.K	2	2250.21	50.97	1.82205	2	2	0.99	1	3084978	2595610	1.13	0.0848528	15N
AT1G02780.1	emb2386 (embryo defective 2386); structural constituent of ribosome	K.VWLDPNESSDISMANSR.Q	2	1919.88	75.48	2.44807	1	1	0.99	1	5270065	4380562	1.2	0	15N
AT1G02920.1	GSTF7; copper ion binding / glutathione binding / glutathione transferase	R.VLIALHEK.N	3	921.578	21.99	5.75104	1	1	0.92	4	1780784	2456047	0.73	0	14N
AT1G02920.1	GSTF7; copper ion binding / glutathione binding / glutathione transferase	R.RVLIALHEK.N	3	1077.68	46.48	5.56755	1	1	0.82	4	1100108	1205782	0.91	0	14N
AT1G02920.1	GSTF7; copper ion binding / glutathione binding / glutathione transferase	R.VLIALHEK.N	3	921.577	27.62	4.88296	1	1	0.94	4	1897389	889017	2.13	0	15N
AT1G02920.1	GSTF7; copper ion binding / glutathione binding / glutathione transferase	R.RVLIALHEK.N	3	1077.68	48.04	5.10359	1	1	0.95	4	1411305	580852	2.43	0	15N
AT1G02920.1	GSTF7; copper ion binding / glutathione binding / glutathione transferase	K.LVWEQVLKPLYGMTTDK.T	3	2021.09	23.15	2.20061	1	1	0.83	2	32557916	5098825	6.39	0	15N
AT1G03220.1	extracellular dermal glycoprotein, putative / EDGP, putative	K.GVAFFGNGPYVFLPGIQISSLQ*TTPLLINPVSTASAFSQGEK.S	4	4354.3	36.56	6.94775	2	2	0.89	1	5711712	7581890	0.75	0	14N
AT1G03220.1	extracellular dermal glycoprotein, putative / EDGP, putative	K.GYVSSTYQSPR.C	2	1243.59	63.27	2.97525	1	1	0.97	1	901231	738179	1.22	0	14N
AT1G03220.1	extracellular dermal glycoprotein, putative / EDGP, putative	R.VASVKPFGACFSTK.N	3	1497.78	35.52	5.0742	1	1	0.95	2	9721737	12155096	0.8	0	14N
AT1G03220.1	extracellular dermal glycoprotein, putative / EDGP, putative	K.FGFSSTLLGR.Q	2	1083.58	76.71	3.59918	2	2	0.97	2	17380844	21378040	0.81	0	14N
AT1G03220.1	extracellular dermal glycoprotein, putative / EDGP, putative	R.TPLVPASVVFDLGGR.E	2	1526.86	47.93	7.26985	2	2	0.94	2	32492029	41018981	0.79	0	14N
AT1G03220.1	extracellular dermal glycoprotein, putative / EDGP, putative	R.LGYAVPEIELVLHSK.D	3	1666.95	52.35	7.9787	2	2	0.97	1	26532390	29884719	0.89	0	14N
AT1G03220.1	extracellular dermal glycoprotein, putative / EDGP, putative	K.ISSVNPYTVLESSIYNAFTSEFVK.Q	2	2694.36	51.07	2.264	4	4	0.82	1	7323162	8334812	0.88	0	14N
AT1G03220.1	extracellular dermal glycoprotein, putative / EDGP, putative	K.IPNLIFDCGATFLLK.G	2	1720.94	39.04	5.52027	1	1	0.73	1	5496264	6407456	0.86	0	14N
AT1G03220.1	extracellular dermal glycoprotein, putative / EDGP, putative	K.GVAFFGNGPYVFLPGIQ*ISSLQ*TTPLLINPVSTASAFSQGEK.S	3	4356.32	33.5	13.8235	1	1	0.89	1	2646032	4930021	0.54	0	14N
AT1G03220.1	extracellular dermal glycoprotein, putative / EDGP, putative	R.ELWVDCDKGYVSSTYQSPR.C	3	2289.06	29.41	5.15499	1	1	0.76	1	3812142	3646222	1.05	0	14N
AT1G03220.1	extracellular dermal glycoprotein, putative / EDGP, putative	K.DQSTLQYTTVINQR.T	2	1665.84	75.24	1.92095	1	1	0.86	1	4378739	5229087	0.84	0	14N
AT1G03220.1	extracellular dermal glycoprotein, putative / EDGP, putative	K.GVAFFGNGPYVFLPGIQ*ISSLQTTPLLINPVSTASAFSQGEK.S	3	4354.31	25.53	8.62465	1	1	0.89	1	4519422	6622577	0.68	0	15N
AT1G03220.1	extracellular dermal glycoprotein, putative / EDGP, putative	K.GYVSSTYQSPR.C	2	1243.59	31.51	2.25154	2	2	0.99	1	2339452	2511020	0.93	0	15N
AT1G03220.1	extracellular dermal glycoprotein, putative / EDGP, putative	K.ALLLPVTK.D	2	853.577	26.93	6.09205	2	2	0.96	2	11305212	12526821	0.9	0	15N
AT1G03220.1	extracellular dermal glycoprotein, putative / EDGP, putative	K.FGFSSTLLGR.Q	2	1083.58	74.58	4.61434	2	2	0.99	2	20426739	23663344	0.86	0	15N
AT1G03220.1	extracellular dermal glycoprotein, putative / EDGP, putative	R.TPLVPASVVFDLGGR.E	2	1526.86	45.6	3.27471	2	2	0.94	2	37716285	48136554	0.78	0	15N
AT1G03220.1	extracellular dermal glycoprotein, putative / EDGP, putative	R.LGYAVPEIELVLHSK.D	3	1666.95	35.45	6.89888	2	2	0.85	1	21408498	24131966	0.89	0	15N
AT1G03220.1	extracellular dermal glycoprotein, putative / EDGP, putative	K.ISSVNPYTVLESSIYNAFTSEFVK.Q	2	2694.36	60.83	2.56091	7	7	0.92	1	5989843	6672325	0.865714	0.0359894	15N
AT1G03220.1	extracellular dermal glycoprotein, putative / EDGP, putative	R.ELWVDCDKGYVSSTYQSPR.C	3	2290.07	34.68	7.70863	1	1	0.94	1	2278340	2594872	0.88	0	15N
AT1G03220.1	extracellular dermal glycoprotein, putative / EDGP, putative	K.DQSTLQYTTVINQR.T	2	1665.84	69.08	2.46122	1	1	0.89	1	5922668	6192394	0.96	0	15N
AT1G03220.1	extracellular dermal glycoprotein, putative / EDGP, putative	K.GVAFFGNGPYVFLPGIQISSLQ*TTPLLIN*PVSTASAFSQGEK.S	4	4354.3	24.87	11.3912	1	1	0.89	1	7202833	11627511	0.62	0	15N
AT1G03220.1	extracellular dermal glycoprotein, putative / EDGP, putative	R.VASVKPFGACFSTK.N	2	1497.78	29.57	2.47033	2	2	0.98	2	844446	1012143	0.845	0.0212132	15N
AT1G03220.1	extracellular dermal glycoprotein, putative / EDGP, putative	R.HNIGLPSQ*FAAAFSFHR.K	3	1899.95	24.43	0.105266	1	1	0.84	1	3438727	3543706	0.97	0	15N
AT1G03220.1	extracellular dermal glycoprotein, putative / EDGP, putative	K.IPNLIFDCGATFLLK.G	2	1720.95	48.94	11.6216	1	1	0.85	1	7190355	8411059	0.85	0	15N
AT1G03230.1	extracellular dermal glycoprotein, putative / EDGP, putative	K.TPLLINPGTTVFEFSK.G	2	1762.96	43.9	0.907565	1	1	0.86	1	3350682	4443677	0.75	0	14N
AT1G03230.1	extracellular dermal glycoprotein, putative / EDGP, putative	R.GVAFFGNGPYVFLPGIQISR.L	2	2138.14	33.85	2.66587	1	1	0.84	1	1697054	2922710	0.58	0	14N
AT1G03230.1	extracellular dermal glycoprotein, putative / EDGP, putative	K.ISSVNPYTVLESSIYK.A	2	1798.96	55.72	10.0615	1	1	0.9	1	3584554	4201868	0.85	0	15N
AT1G03230.1	extracellular dermal glycoprotein, putative / EDGP, putative	R.GVAFFGNGPYVFLPGIQISR.L	2	2138.14	24.11	1.63694	1	1	0.89	1	2024135	2958931	0.68	0	15N
AT1G03230.1	extracellular dermal glycoprotein, putative / EDGP, putative	K.TPLLINPGTTVFEFSK.G	2	1762.97	64.86	3.91388	1	1	0.86	1	4903417	4938350	0.99	0	15N
AT1G03230.1	extracellular dermal glycoprotein, putative / EDGP, putative	K.IPNLIFSCGSTSLLK.G	2	1648.9	23.56	4.36656	1	1	0.91	1	2433598	2694260	0.9	0	15N
AT1G03230.1	extracellular dermal glycoprotein, putative / EDGP, putative	K.SPEYFIGVTAIK.I	2	1323.72	53.86	5.2126	1	1	0.91	1	1850599	2077937	0.89	0	15N
AT1G03860.2	ATPHB2 (PROHIBITIN 2)	R.EIAQTIAQSANK.V	2	1272.68	64.04	1.88579	1	1	0.57	2	689011	961630	0.72	0	15N
AT1G03870.1	FLA9 (FASCICLIN-LIKE ARABINOOGALACTAN 9)	K.YYSMDDLLSVSNPVR.T	2	1757.85	39.85	4.66482	1	1	0.91	1	3066223	4432194	0.69	0	14N
AT1G03870.1	FLA9 (FASCICLIN-LIKE ARABINOOGALACTAN 9)	K.LILYHVSPK.Y	3	1068.65	21.03	5.52103	1	1	0.99	2	3662041	5252122	0.7	0	14N
AT1G03870.1	FLA9 (FASCICLIN-LIKE ARABINOOGALACTAN 9)	R.QQRPLAVYVVDMVLLPGEMFGEHK.L	4	2755.44	39.38	5.11717	4	4	0.79	1	5173203	6252718	0.835	0.0057735	14N
AT1G04270.1	RPS15 (CYTOSOLIC RIBOSOMAL PROTEIN S15); structural constituent of ribosome	R.NMIIVPEMIGSIIGVYN*GK.T	2	2048.1	33.24	12.1089	1	1	0.91	5	2721330	12461285	0.22	0	14N
AT1G04270.1	RPS15 (CYTOSOLIC RIBOSOMAL PROTEIN S15); structural constituent of ribosome	R.NMIIVPEMIGSIIGVYNGK.T	2	2047.1	29.6	3.07754	3	3	0.9	5	3633497	5678779	0.68	0.069282	14N
AT1G04270.1	RPS15 (CYTOSOLIC RIBOSOMAL PROTEIN S15); structural constituent of ribosome	R.NMIIVPEMIGSIIGVYNGK.T	2	2047.11	89.56	6.20392	5	5	0.94	5	3439209	3026591	0.984	0.142408	15N
AT1G04410.1	malate dehydrogenase, cytosolic, putative	K.NVIIWGNHSSSQYPDVNHAK.V	3	2265.11	31.59	4.32652	2	2	0.91	1	27092479	36948664	0.73	0	14N
AT1G04410.1	malate dehydrogenase, cytosolic, putative	R.KLSSALSAASSACDHIR.D	3	1772.9	52.87	2.76385	1	1	0.84	2	7594131	9835325	0.77	0	14N
AT1G04410.1	malate dehydrogenase, cytosolic, putative	K.VLVVANPANTNALILK.E	2	1649	72.14	4.24501	3	3	0.96	3	68281572	93550991	0.73	0	14N
AT1G04410.1	malate dehydrogenase, cytosolic, putative	R.VLVTGAAGQIGYALVPMIAR.G	3	1999.15	63.36	8.40363	5	5	0.88	2	18606022	25666978	0.714	0.00547723	14N
AT1G04410.1	malate dehydrogenase, cytosolic, putative	R.GIMLGADQPVILHMLDIPPAAEALN*GVK.M	3	2884.58	39.81	14.2344	3	3	0.94	1	47827279	83483868	0.563333	0.011547	14N
AT1G04410.1	malate dehydrogenase, cytosolic, putative	R.NGDWSIVQGLPIDEVSR.K	2	1883.95	84.12	3.66253	2	2	0.86	1	19262373	25537278	0.75	0	14N
AT1G04410.1	malate dehydrogenase, cytosolic, putative	R.N*GDWSIVQGLPIDEVSR.K	2	1884.94	56.25	4.93387	2	2	0.93	1	9759092	11327099	0.86	0	14N
AT1G04410.1	malate dehydrogenase, cytosolic, putative	R.GIMLGADQ*PVILHMLDIPPAAEALN*GVK.M	3	2885.57	36.4	16.3096	2	2	0.89	1	25144474	70786965	0.35	0.0141421	14N
AT1G04410.1	malate dehydrogenase, cytosolic, putative	K.MELIDAAFPLLK.G	2	1359.76	67.41	7.0601	6	6	0.87	1	60441155	83647718	0.72	1.3328e-08	14N
AT1G04410.1	malate dehydrogenase, cytosolic, putative	R.GIMLGADQPVILHMLDIPPAAEALNGVK.M	3	2882.57	63.88	6.48732	5	5	0.96	1	44672617	67987817	0.66	0	14N
AT1G04410.1	malate dehydrogenase, cytosolic, putative	R.LSVPVSDVK.N	2	942.55	40.79	4.13773	1	1	0.99	2	27888205	23263707	1.2	0	15N
AT1G04410.1	malate dehydrogenase, cytosolic, putative	K.NVIIWGNHSSSQYPDVNHAK.V	3	2265.11	26.93	3.22282	2	2	0.98	1	33009663	24072710	1.37	0	15N
AT1G04410.1	malate dehydrogenase, cytosolic, putative	R.VLVTGAAGQIGYALVPMIAR.G	2	1999.15	70.48	5.00216	6	6	0.94	2	19845455	14367763	1.355	0.0273861	15N
AT1G04410.1	malate dehydrogenase, cytosolic, putative	R.NGDWSIVQGLPIDEVSR.K	2	1883.95	83.06	3.02557	3	3	0.95	1	24485795	15961435	1.53	0	15N
AT1G04410.1	malate dehydrogenase, cytosolic, putative	R.ELVKDDAWLDGEFISTVQQR.G	3	2348.18	25.01	3.74759	1	1	0.22	1	9884090	15792006	0.63	0	15N
AT1G04410.1	malate dehydrogenase, cytosolic, putative	R.KLSSALSAASSACDHIR.D	3	1772.89	36.31	1.41013	1	1	0.9	2	15631113	11327583	1.38	0	15N
AT1G04410.1	malate dehydrogenase, cytosolic, putative	K.VLVVANPANTNALILK.E	2	1649	94.05	4.42694	4	4	0.96	3	90641319	72576541	1.25	0	15N
AT1G04410.1	malate dehydrogenase, cytosolic, putative	R.GIMLGADQPVILHMLDIPPAAEALN*GVK.M	3	2883.57	36.47	12.9702	3	3	0.7	1	50742333	48546124	1.06333	0.0152753	15N
AT1G04410.1	malate dehydrogenase, cytosolic, putative	R.N*GDWSIVQGLPIDEVSR.K	2	1884.94	60.91	5.14608	2	2	0.85	1	16026597	9978324	1.61	0	15N
AT1G04410.1	malate dehydrogenase, cytosolic, putative	K.MELIDAAFPLLK.G	2	1359.76	91.97	6.25113	6	6	0.9	1	78854618	66115061	1.19	2.6656e-08	15N
AT1G04410.1	malate dehydrogenase, cytosolic, putative	R.GIMLGADQPVILHMLDIPPAAEALNGVK.M	3	2882.56	69.56	5.27311	6	6	0.97	1	65260501	50168141	1.3	0	15N
AT1G04480.1	60S ribosomal protein L23 (RPL23A)	R.MSLGLPVAATVNCADNTGAK.N	2	1988.98	62.28	3.21774	1	1	0.97	1	3749591	5177911	0.72	0	14N
AT1G04480.1	60S ribosomal protein L23 (RPL23A)	R.MSLGLPVAATVNCADNTGAK.N	2	1988.98	81.39	2.56414	1	1	0.98	1	4185333	4108596	1.02	0	15N
AT1G04810.1	26S proteasome regulatory subunit, putative	R.IVSLLSESYNPHVR.Y	3	1612.87	20.68	4.58811	1	1	0.83	2	1625835	2517130	0.65	0	15N
AT1G04820.1	TUA4; structural constituent of cytoskeleton	R.AVFVDLEPTVIDEVR.T	2	1700.91	76.71	4.46821	3	3	0.84	4	22849213	30131768	0.76	0	14N
AT1G04820.1	TUA4; structural constituent of cytoskeleton	K.AFHEQLSVAEITNSAFEPASMMAK.C	3	2608.25	25.76	4.94587	1	1	0.7	3	5603918	7954178	0.7	0	14N
AT1G04820.1	TUA4; structural constituent of cytoskeleton	K.YMACCLMYR.G	2	1266.52	28.34	5.36909	1	1	0.86	5	2184285	2582195	0.85	0	14N
AT1G04820.1	TUA4; structural constituent of cytoskeleton	R.LVSQVISSLTASLR.F	2	1472.87	84.14	6.92528	2	2	0.81	3	5200778	6911111	0.77	0.0282843	14N
AT1G04820.1	TUA4; structural constituent of cytoskeleton	K.CGINYQPPTVVPGGDLAK.V	2	1884.95	43.49	1.16714	1	1	0.95	4	3143335	4123195	0.76	0	14N
AT1G04820.1	TUA4; structural constituent of cytoskeleton	K.TVGGGDDAFNTFFSETGAGK.H	2	1976.9	62.16	7.89121	1	1	0.9	3	3633547	4892628	0.74	0	14N
AT1G04820.1	TUA4; structural constituent of cytoskeleton	R.TIQFVDWCPTGFK.C	2	1597.77	25.28	3.4423	1	1	0.65	4	7818138	5643062	1.39	0	14N
AT1G04820.1	TUA4; structural constituent of cytoskeleton	K.EIVDLCLDR.I	2	1131.57	26.55	3.53492	1	1	0.86	4	4530346	3705136	1.22	0	15N
AT1G04820.1	TUA4; structural constituent of cytoskeleton	R.AVFVDLEPTVIDEVR.T	2	1700.91	74.25	4.58579	3	3	0.89	4	31500435	28818743	1.09	0	15N
AT1G04820.1	TUA4; structural constituent of cytoskeleton	R.FDGALNVDVTEFQTNLVPYPR.I	2	2394.21	66.1	6.55753	1	1	0.86	3	3867331	3541204	1.09	0	15N
AT1G04820.1	TUA4; structural constituent of cytoskeleton	R.LVSQVISSLTASLR.F	3	1472.87	51.01	6.31423	1	1	0.93	3	4641042	3386106	1.37	0	15N
AT1G04820.1	TUA4; structural constituent of cytoskeleton	R.TIQFVDWCPTGFK.C	2	1597.78	35.36	4.9444	1	1	0.93	4	4901893	3641103	1.35	0	15N
AT1G04820.1	TUA4; structural constituent of cytoskeleton	R.IDHKFDLMYAK.R	3	1379.69	22.49	-9.13243	1	1	0.93	3	4951476	3864252	1.28	0	15N
AT1G04820.1	TUA4; structural constituent of cytoskeleton	K.AFHEQLSVAEITNSAFEPASMMAK.C	3	2608.24	41.41	1.45692	2	2	0.87	3	9049541	8366629	1.08	0	15N
AT1G04820.1	TUA4; structural constituent of cytoskeleton	R.IHFMLSSYAPVISAEK.A	3	1791.94	21.15	4.24124	1	1	0.97	3	11263825	9014594	1.25	0	15N
AT1G04820.1	TUA4; structural constituent of cytoskeleton	K.FDLMYAK.R	2	886.437	25.82	3.49716	1	1	0.86	3	2982019	2281725	1.31	0	15N
AT1G05240.1	peroxidase, putative	R.MHFHDCFVR.G	3	1247.55	27.1	5.13009	1	1	0.97	5	3203188	1863496	1.72	0	15N
AT1G05240.1	peroxidase, putative	K.GLFTSDSTLLDDIETK.N	2	1753.88	38.18	4.39029	1	1	0.9	1	1268490	1033243	1.23	0	15N
AT1G05260.1	RCI3 (RARE COLD INDUCIBLE GENE 3); peroxidase	K.IVQDFVSNHVSNAPSLAAALIR.M	3	2321.27	46.84	4.91113	1	1	0.79	1	2427574	4944340	0.49	0	14N
AT1G05260.1	RCI3 (RARE COLD INDUCIBLE GENE 3); peroxidase	R.GGQDPALDSEYAANLK.S	2	1647.79	57.71	4.30882	1	1	0.93	1	738050	1080152	0.68	0	14N
AT1G05260.1	RCI3 (RARE COLD INDUCIBLE GENE 3); peroxidase	R.ILTGSVGSFFSEFAK.S	2	1588.84	48.7	9.56684	1	1	0.93	1	2392502	2567117	0.93	0	15N
AT1G05260.1	RCI3 (RARE COLD INDUCIBLE GENE 3); peroxidase	K.IVQDFVSNHVSNAPSLAAALIR.M	3	2321.27	49.17	5.47117	1	1	0.87	1	2928512	4281847	0.68	0	15N
AT1G06000.1	UDP-glucoronosyl/UDP-glucosyl transferase family protein	R.SFFNDLETATTESYGLVIN*SFYDLEPEFVETVK.T	3	3804.83	22.95	9.67202	1	1	0.85	1	754332	770160	0.98	0	14N
AT1G06030.1	pfkB-type carbohydrate kinase family protein	R.FANACGAITTTK.K	2	1253.62	55.09	1.99423	2	2	0.91	3	2722220	3955326	0.69	0	14N
AT1G06030.1	pfkB-type carbohydrate kinase family protein	K.LGDDEFGHMLAGILR.K	3	1642.83	66.96	5.60012	2	2	0.96	2	12167235	17029362	0.71	0	14N
AT1G06030.1	pfkB-type carbohydrate kinase family protein	K.APGGAPANVAIAVSR.L	2	1349.75	36.01	2.88943	1	1	0.88	3	4720221	6421421	0.74	0	14N
AT1G06030.1	pfkB-type carbohydrate kinase family protein	K.APGGAPANVAIAVSR.L	2	1349.75	65.5	3.55622	2	2	0.98	3	7427021	4871332	1.52	0	15N
AT1G06030.1	pfkB-type carbohydrate kinase family protein	R.FANACGAITTTK.K	2	1253.62	55.02	3.111	1	1	0.99	3	3620872	2855094	1.27	0	15N
AT1G06030.1	pfkB-type carbohydrate kinase family protein	K.LGDDEFGHMLAGILR.K	3	1642.83	68.67	6.63493	2	2	0.93	2	20763994	15631281	1.33	0	15N
AT1G06030.1	pfkB-type carbohydrate kinase family protein	R.TALAFVTLR.S	2	990.593	53.7	-0.908546	2	2	0.9	5	10805282	8467862	1.28	0	15N
AT1G07140.1	SIRANBP; Ran GTPase binding	R.DFADGELKDELFCIR.F	3	1826.87	29.35	6.40444	1	1	0.94	1	2930955	1992515	1.47	0	15N
AT1G07660.1	histone H4	R.DNIQGITKPAIR.R	2	1324.76	26.49	4.52914	1	1	0.75	1	1253052	7116949	0.18	0	14N
AT1G07660.1	histone H4	R.ISGLIYEETR.G	2	1179.63	47.26	3.98433	2	2	0.85	2	5579276	10203717	0.55	0	14N
AT1G07660.1	histone H4	K.TVTAMDVVYALK.R	2	1309.71	30.51	7.94073	1	1	0.79	2	9796427	6043772	1.62	0	14N
AT1G07660.1	histone H4	K.IFLENVIR.D	2	1002.6	33.1	4.78758	1	1	0.88	2	16299281	21032864	0.77	0	14N
AT1G07660.1	histone H4	R.DNIQGITKPAIR.R	2	1324.76	41.29	3.47234	3	3	0.98	1	2245115	8909730	0.723333	0.409919	15N
AT1G07660.1	histone H4	R.ISGLIYEETR.G	2	1179.63	51.52	10.088	2	2	0.93	2	9030026	10042945	0.9	0	15N
AT1G07660.1	histone H4	K.IFLENVIR.D	2	1002.6	36.3	5.28629	2	2	0.92	2	24064713	27892152	0.86	0	15N
AT1G07660.1	histone H4	K.TVTAMDVVYALK.R	2	1309.71	49.46	7.10085	1	1	0.78	2	18277358	10163792	1.8	0	15N
AT1G07750.1	cupin family protein	R.AGFVLNCLEAPLDVDIKDGGR.V	3	2258.16	27.07	8.14828	1	1	0.91	1	2114603	3996608	0.53	0	14N
AT1G07750.1	cupin family protein	K.IADADGMSWFSIVTTPDPIFTHLAGN*TSVWK.S	3	3378.68	43.66	10.9382	1	1	0.77	1	2782022	5049403	0.55	0	14N
AT1G07750.1	cupin family protein	K.SLSPEVLQAAFK.V	2	1288.72	26.85	4.26783	1	1	0.9	1	17261372	17827258	0.97	0	15N
AT1G07750.1	cupin family protein	K.NLPLVGEVGFGADLVR.I	2	1654.93	41.17	12.8103	1	1	0.86	2	2359902	2569775	0.92	0	15N
AT1G07750.1	cupin family protein	K.IADADGMSWFSIVTTPDPIFTHLAGNTSVWK.S	3	3376.67	34.75	5.92303	1	1	0.78	1	4739582	4314962	1.1	0	15N
AT1G07750.1	cupin family protein	R.AGFVLNCLEAPLDVDIKDGGR.V	3	2258.15	33.59	2.47991	1	1	0.92	1	1919163	2390684	0.8	0	15N
AT1G07750.1	cupin family protein	K.IADADGMSWFSIVTTPDPIFTHLAGN*TSVWK.S	3	3377.66	37.86	7.87533	2	2	0.97	1	3357467	3006160	1.13	0.0141421	15N
AT1G07770.1	RPS15A (ribosomal protein s15a); structural constituent of ribosome	K.HGYIGEFEYVDDHR.S	3	1736.78	25.27	3.31001	1	1	0.9	2	4978882	5163573	0.96	0	14N
AT1G07770.1	RPS15A (ribosomal protein s15a); structural constituent of ribosome	R.ISVLNDALK.S	2	971.58	31.64	7.30774	1	1	0.97	1	9249113	11527276	0.8	0	14N
AT1G07770.1	RPS15A (ribosomal protein s15a); structural constituent of ribosome	R.ISVLNDALK.S	2	971.579	24.59	6.58726	2	2	0.93	1	8123265	7344743	1.105	0.00707107	15N
AT1G07790.1	HTB1; DNA binding	K.QVHPDIGISSK.A	3	1179.65	28.5	11.3595	1	1	0.94	6	4642366	7962651	0.58	0	14N
AT1G07790.1	HTB1; DNA binding	R.LVLPGELAK.H	2	938.593	32.32	5.00752	1	1	0.72	9	26405284	32437449	0.81	0	14N
AT1G07790.1	HTB1; DNA binding	K.AMGIMNSFINDIFEK.L	2	1728.84	96.18	3.99114	4	4	0.91	9	32601301	39295280	0.83	0	14N
AT1G07790.1	HTB1; DNA binding	K.QVHPDIGISSK.A	3	1179.64	35.39	5.42542	2	2	0.95	6	5566986	6607936	0.84	0	15N
AT1G07790.1	HTB1; DNA binding	K.AMGIMNSFINDIFEK.L	2	1728.84	99.57	3.41271	4	4	0.97	9	45197491	47378568	0.9425	0.005	15N
AT1G07890.3	APX1 (ascorbate peroxidase 1); L-ascorbate peroxidase	K.ALLDDPVFRPLVEK.Y	2	1610.92	49.96	4.7799	1	1	0.89	2	3016137	4203138	0.72	0	14N
AT1G07890.3	APX1 (ascorbate peroxidase 1); L-ascorbate peroxidase	K.EGLLQLVSDK.A	2	1100.62	31.82	6.54179	1	1	0.89	2	5495910	7282260	0.75	0	14N
AT1G07890.3	APX1 (ascorbate peroxidase 1); L-ascorbate peroxidase	K.QMGLSDKDIVALSGAHTLGR.C	4	2068.09	27.17	4.35186	3	3	0.89	2	19448881	28097543	0.746667	0.0981495	14N
AT1G07890.3	APX1 (ascorbate peroxidase 1); L-ascorbate peroxidase	K.ELLSGEKEGLLQLVSDK.A	2	1857.03	54.04	5.22343	1	1	0.97	2	1669665	2531072	0.66	0	14N
AT1G07890.3	APX1 (ascorbate peroxidase 1); L-ascorbate peroxidase	R.SGFEGAWTSNPLIFDNSYFK.E	2	2279.08	75.49	6.14288	5	5	0.91	2	21263951	29258795	0.734	0.00894427	14N
AT1G07890.3	APX1 (ascorbate peroxidase 1); L-ascorbate peroxidase	R.FDAEQAHGANSGIHIALR.L	3	1905.97	25.48	8.28982	1	1	0.8	2	5111634	5888325	0.87	0	14N
AT1G07890.3	APX1 (ascorbate peroxidase 1); L-ascorbate peroxidase	K.EGLLQLVSDK.A	2	1100.62	33.44	3.54347	1	1	0.93	2	12892870	10456346	1.23	0	15N
AT1G07890.3	APX1 (ascorbate peroxidase 1); L-ascorbate peroxidase	R.SGFEGAWTSNPLIFDNSYFK.E	2	2279.07	94.18	4.65104	6	6	0.97	2	25552904	21484047	1.185	0.0176068	15N
AT1G07890.3	APX1 (ascorbate peroxidase 1); L-ascorbate peroxidase	K.NYPTVSEDYKK.A	3	1342.65	20.71	3.87294	1	1	0.99	2	6003048	5106218	1.18	0	15N
AT1G07890.3	APX1 (ascorbate peroxidase 1); L-ascorbate peroxidase	K.ALLDDPVFRPLVEK.Y	2	1610.91	37.85	2.17268	2	2	0.97	2	5203955	6417892	0.95	0.19799	15N
AT1G07890.3	APX1 (ascorbate peroxidase 1); L-ascorbate peroxidase	K.QMGLSDKDIVALSGAHTLGR.C	4	2068.09	23.79	4.93211	1	1	0.97	2	24260310	21442850	1.13	0	15N
AT1G07890.3	APX1 (ascorbate peroxidase 1); L-ascorbate peroxidase	K.YAADEDAFFADYAEAHMK.L	3	2063.88	26.5	6.1535	1	1	0.82	2	7929622	6756236	1.17	0	15N
AT1G07890.3	APX1 (ascorbate peroxidase 1); L-ascorbate peroxidase	R.FDAEQAHGANSGIHIALR.L	3	1905.96	60.96	4.24984	3	3	0.96	2	7841209	5431905	1.42667	0.0152753	15N
AT1G07920.1	elongation factor 1-alpha / EF-1-alpha	R.YDEIIKEVSSYLK.K	3	1585.84	23.2	6.30584	1	1	0.85	3	3008186	3678595	0.82	0	14N
AT1G07920.1	elongation factor 1-alpha / EF-1-alpha	K.ARYDEIIK.E	3	1006.56	35.67	4.27201	2	2	0.94	3	7791588	9988626	0.78	0	14N
AT1G07920.1	elongation factor 1-alpha / EF-1-alpha	K.YYCTVIDAPGHRDFIK.N	3	1953.96	30.1	3.37778	1	1	0.93	3	3858233	5001539	0.77	0	14N
AT1G07920.1	elongation factor 1-alpha / EF-1-alpha	R.VETGMIKPGMVVTFAPTGLTTEVK.S	3	2505.34	39.03	3.99149	7	7	0.88	2	5984703	8120253	0.722857	0.00755929	14N
AT1G07920.1	elongation factor 1-alpha / EF-1-alpha	R.LPLQDVYK.I	2	974.554	40.29	2.97573	1	1	0.97	3	16303999	22294892	0.73	0	14N
AT1G07920.1	elongation factor 1-alpha / EF-1-alpha	K.MTPTKPMVVETFSEYPPLGR.F	2	2279.15	75.61	5.22127	6	6	0.98	2	179747059	253658888	0.733333	0.0571548	14N
AT1G07920.1	elongation factor 1-alpha / EF-1-alpha	K.YYCTVIDAPGHR.D	3	1450.68	55.46	4.41174	4	4	0.94	3	2745284	2939537	0.7875	0.095	14N
AT1G07920.1	elongation factor 1-alpha / EF-1-alpha	R.STNLDWYK.G	2	1025.49	39.32	3.31549	1	1	0.95	3	13303790	17682566	0.75	0	14N
AT1G07920.1	elongation factor 1-alpha / EF-1-alpha	R.VETGMIKPGM#VVTFAPTGLTTEVK.S	3	2521.34	28.82	6.70282	1	1	0.8	2	5659185	8145248	0.69	0	14N
AT1G07920.1	elongation factor 1-alpha / EF-1-alpha	K.IGGIGTVPVGR.V	2	1024.61	73.63	2.83034	3	3	0.97	3	83155191	119623566	0.7	1.49012e-08	14N
AT1G07920.1	elongation factor 1-alpha / EF-1-alpha	K.GAANFTSQVIIMNHPGQ*IGNGYAPVLDCHTSHIAVK.F	5	3819.92	23.27	10.5008	1	1	0.68	2	13992059	14174360	0.99	0	15N
AT1G07920.1	elongation factor 1-alpha / EF-1-alpha	K.ARYDEIIK.E	3	1006.56	34.1	6.85508	1	1	0.96	3	10077975	9472539	1.06	0	15N
AT1G07920.1	elongation factor 1-alpha / EF-1-alpha	R.VETGMIKPGMVVTFAPTGLTTEVK.S	3	2505.34	44.09	5.14902	8	8	0.94	2	7971296	6905884	1.0525	0.0601783	15N
AT1G07920.1	elongation factor 1-alpha / EF-1-alpha	R.EHALLAFTLGVK.Q	3	1297.76	33.22	7.24332	3	3	0.87	3	7613287	8259897	0.936667	0.0960902	15N
AT1G07920.1	elongation factor 1-alpha / EF-1-alpha	K.YYCTVIDAPGHR.D	3	1450.68	68.83	3.17094	5	5	0.97	3	52379450	51154863	1.18	0.219089	15N
AT1G07920.1	elongation factor 1-alpha / EF-1-alpha	R.VETGMIKPGM#VVTFAPTGLTTEVK.S	3	2522.36	25.84	10.9646	1	1	0.86	2	3910622	3951787	0.99	0	15N
AT1G07920.1	elongation factor 1-alpha / EF-1-alpha	K.IGGIGTVPVGR.V	2	1024.61	76.95	3.12314	4	4	0.97	3	97426078	101381219	0.96	0	15N
AT1G07920.1	elongation factor 1-alpha / EF-1-alpha	R.LPLQDVYK.I	2	974.554	55.46	3.07834	2	2	0.99	3	45551256	41963675	1.09	0	15N
AT1G07920.1	elongation factor 1-alpha / EF-1-alpha	K.MTPTKPMVVETFSEYPPLGR.F	2	2279.15	64	3.07133	8	8	0.97	2	245566514	234259410	1.0775	0.0509201	15N
AT1G07920.1	elongation factor 1-alpha / EF-1-alpha	R.STNLDWYK.G	2	1025.49	40.1	3.12046	3	3	0.96	3	40606749	35901155	1.13	0	15N
AT1G08200.1	AXS2 (UDP-D-APIOSE/UDP-D-XYLOSE SYNTHASE 2); UDP-glucuronate decarboxylase	K.DAIEAVLLMIENPER.A	3	1711.9	45.85	6.19199	2	2	0.9	2	961577	968811	1.09	0.141421	15N
AT1G08200.1	AXS2 (UDP-D-APIOSE/UDP-D-XYLOSE SYNTHASE 2); UDP-glucuronate decarboxylase	K.VSGETAIESPTIDVSSK.E	2	1718.87	45.64	1.10538	1	1	0.91	1	1237160	1278802	0.97	0	15N
AT1G08350.2	endomembrane protein 70 family protein	-.M#AQ*FLLTVLQ*VLLALTFWIGIGSGSSNHYNAGDHVPLFVNK.V	3	4488.34	21.75	2.60676	1	1	0.89	1	1125781	343136	3.28	0	14N
AT1G08880.1	H2AXA; DNA binding	R.VGAGAPVYLSAVLEYLAAEVLELAGNAAR.D	3	2886.57	61.71	4.33042	4	4	0.92	2	4668465	6915765	0.74	0.0711805	14N
AT1G08880.1	H2AXA; DNA binding	R.VGAGAPVYLSAVLEYLAAEVLELAGNAAR.D	3	2886.58	84.81	6.99796	6	6	0.9	2	13138277	13313406	1	0.0701427	15N
AT1G09080.1	BIP3; ATP binding	R.VEIESLFDGVDFSEPLTR.A	2	2052.03	54.83	7.3099	1	1	0.93	2	4284250	5980082	0.72	0	14N
AT1G09100.1	RPT5B (26S proteasome AAA-ATPase subunit RPT5B); ATPase/ calmodulin binding	K.QIQELVEAIVLPMTHK.E	3	1848.04	29.58	8.82022	1	1	0.79	2	2081248	7599093	0.27	0	15N
AT1G09100.1	RPT5B (26S proteasome AAA-ATPase subunit RPT5B); ATPase/ calmodulin binding	K.GVLLYGPPGTGK.T	2	1157.66	28.12	4.66461	1	1	0.96	11	3207280	3049294	1.05	0	15N
AT1G09180.1	ATSARA1A (ARABIDOPSIS THALIANA SECRETION-ASSOCIATED RAS SUPER FAMILY 1); GTP binding	K.ILFLGLDNAGK.T	2	1159.67	46.61	4.65651	1	1	0.85	4	2373830	2869053	0.83	0	15N
AT1G09200.1	histone H3	R.FQSSAVAALQEAAEAYLVGLFEDTN*LCAIHAK.R	3	3437.72	44.22	7.82502	1	1	0.83	2	9916800	12461174	0.8	0	14N
AT1G09200.1	histone H3	R.FQSSAVAALQ*EAAEAYLVGLFEDTNLCAIHAK.R	4	3437.74	22.21	14.4283	1	1	0.87	2	5779624	6822002	0.85	0	14N
AT1G09200.1	histone H3	R.FQSSAVAALQEAAEAYLVGLFEDTNLCAIHAK.R	3	3436.73	62.3	6.57607	5	5	0.87	2	10646940	12262108	0.874	0.00894427	14N
AT1G09200.1	histone H3	R.FRPGTVALR.E	3	1015.6	49.41	3.34777	1	1	0.96	4	6150896	6668751	0.92	0	15N
AT1G09200.1	histone H3	R.FQSSAVAALQEAAEAYLVGLFEDTN*LCAIHAK.R	3	3437.74	40.5	13.4974	1	1	0.77	2	9020449	10972943	0.82	0	15N
AT1G09200.1	histone H3	R.FQSSAVAALQEAAEAYLVGLFEDTNLCAIHAK.R	3	3436.73	54.67	6.89614	7	7	0.8	2	5323541	6107546	0.904286	0.0320713	15N
AT1G09210.1	calreticulin 2 (CRT2)	R.FYAISAEFPEFSNK.D	2	1648.79	69.35	1.94082	1	1	0.9	3	2941219	3399022	0.87	0	14N
AT1G09210.1	calreticulin 2 (CRT2)	K.FGGDTPYSIMFGPDICGYSTK.K	2	2312.04	57.87	8.56394	1	1	0.97	3	4339355	5769358	0.75	0	14N
AT1G09210.1	calreticulin 2 (CRT2)	R.FYAISAEFPEFSNKDK.T	3	1891.91	36.51	3.43569	1	1	0.9	3	10552332	9419793	1.12	0	15N
AT1G09210.1	calreticulin 2 (CRT2)	R.FYAISAEFPEFSNK.D	2	1648.79	80.51	4.67011	2	2	0.96	3	6098470	5011763	1.22	0	15N
AT1G09210.1	calreticulin 2 (CRT2)	K.FGGDTPYSIMFGPDICGYSTK.K	2	2312.03	80.66	4.45498	2	2	0.91	3	8001567	7126518	1.12	0	15N
AT1G09210.1	calreticulin 2 (CRT2)	R.FDDGWENR.W	2	1037.43	40.02	3.08455	1	1	0.94	1	788459	761947	1.03	0	15N
AT1G09270.1	IMPA-4 (IMPORTIN ALPHA ISOFORM 4); binding / protein transporter	R.NATWTLSNFCR.G	2	1368.64	44.3	3.14182	1	1	0.91	7	886048	828507	1.07	0	15N
AT1G09560.1	GLP5 (GERMIN-LIKE PROTEIN 5); manganese ion binding / nutrient reservoir	R.IDYAPGGLNPPHTHPR.A	4	1740.89	26.41	4.76771	1	1	0.98	4	13528470	3231610	4.19	0	14N
AT1G09560.1	GLP5 (GERMIN-LIKE PROTEIN 5); manganese ion binding / nutrient reservoir	R.IDYAPGGLNPPHTHPR.A	4	1740.89	34.62	6.66331	2	2	0.97	4	4502250	8043825	0.56	0	15N
AT1G09590.1	60S ribosomal protein L21 (RPL21A)	K.GPKPGFMVEGMTLETVTPIPYDVVNDLK.G	3	3046.57	41.52	6.36786	2	2	0.83	2	9402614	9310738	1.01	0	15N
AT1G09620.1	ATP binding / aminoacyl-tRNA ligase/ leucine-tRNA ligase/ nucleotide binding	R.SPLSVNEIIYALPMLTILTNK.G	3	2330.33	31.4	9.93661	1	1	0.93	1	1702955	2171903	0.78	0	14N
AT1G09620.1	ATP binding / aminoacyl-tRNA ligase/ leucine-tRNA ligase/ nucleotide binding	R.SPLSVNEIIYALPMLTILTNK.G	3	2329.32	31.44	5.19468	2	2	0.89	1	1671054	2083954	0.8	0	15N
AT1G09630.1	ATRAB11C (ARABIDOPSIS RAB GTPASE 11C); GTP binding	K.AQIWDTAGQER.Y	2	1273.62	48.58	1.96292	1	1	0.89	24	1741200	2709462	0.64	0	14N
AT1G09640.1	elongation factor 1B-gamma, putative / eEF-1B gamma, putative	R.VSQMIEDAEPFEGEALLDAK.C	2	2191.05	82.99	5.38556	1	1	0.88	2	7340771	9244691	0.79	0	14N
AT1G09640.1	elongation factor 1B-gamma, putative / eEF-1B gamma, putative	K.YNDENMVSFVTLNK.V	2	1674.79	50.77	1.24989	1	1	0.89	2	2990264	3732185	0.8	0	14N
AT1G09640.1	elongation factor 1B-gamma, putative / eEF-1B gamma, putative	K.MLICGSEGPFK.V	2	1237.6	26.93	3.15128	1	1	0.96	2	2946217	4321101	0.68	0	14N
AT1G09640.1	elongation factor 1B-gamma, putative / eEF-1B gamma, putative	K.VPVLETPEGSVFESNAIAR.Y	2	2014.06	78.19	6.20642	1	1	0.95	1	2491998	3111349	0.8	0	14N
AT1G09640.1	elongation factor 1B-gamma, putative / eEF-1B gamma, putative	K.GFWDMYDPEGYSLWFCDYK.Y	2	2478.02	25.42	7.6271	1	1	0.96	2	1275892	1134377	1.12	0	15N
AT1G09640.1	elongation factor 1B-gamma, putative / eEF-1B gamma, putative	R.VSQMIEDAEPFEGEALLDAK.C	2	2191.05	95.06	4.47276	2	2	0.92	2	11361931	9512940	1.19	0	15N
AT1G09640.1	elongation factor 1B-gamma, putative / eEF-1B gamma, putative	K.MLICGSEGPFK.V	2	1237.59	34.9	2.02005	1	1	0.94	2	4918971	4135212	1.19	0	15N
AT1G09640.1	elongation factor 1B-gamma, putative / eEF-1B gamma, putative	K.VDISDEAQKER.V	2	1288.64	47.69	5.43211	2	2	0.96	2	3152218	2839745	1.31	0.282843	15N
AT1G09640.1	elongation factor 1B-gamma, putative / eEF-1B gamma, putative	K.VPVLETPEGSVFESNAIAR.Y	2	2014.05	65.14	4.51827	1	1	0.93	1	4191167	3684489	1.14	0	15N
AT1G09640.1	elongation factor 1B-gamma, putative / eEF-1B gamma, putative	R.VSQ*MIEDAEPFEGEALLDAK.C	3	2192.06	32.56	13.0929	1	1	0.78	2	2160365	2427179	0.89	0	15N
AT1G09780.1	2,3-biphosphoglycerate-independent phosphoglycerate mutase, putative / phosphoglyceromutase, putative	R.SGYFNEKLEEYVEIPSDSGISFNVQPK.M	3	3075.49	34.15	3.15398	1	1	0.75	2	3745357	5105094	0.73	0	14N
AT1G09780.1	2,3-biphosphoglycerate-independent phosphoglycerate mutase, putative / phosphoglyceromutase, putative	R.LDQLQLLIK.G	2	1082.68	29.65	5.08	1	1	0.91	1	4256534	5146686	0.83	0	14N
AT1G09780.1	2,3-biphosphoglycerate-independent phosphoglycerate mutase, putative / phosphoglyceromutase, putative	K.LQILTSHTLKPVPIAIGGPGLAQGVR.F	3	2635.57	45.95	4.40134	1	1	0.92	1	2503626	3112504	0.8	0	14N
AT1G09780.1	2,3-biphosphoglycerate-independent phosphoglycerate mutase, putative / phosphoglyceromutase, putative	K.DLETPGLANVAATVMN*LHGFVAPSDYEPTLIEVVE.-	3	3711.86	23.14	6.7891	2	2	0.9	1	10440954	15711157	0.66	0	14N
AT1G09780.1	2,3-biphosphoglycerate-independent phosphoglycerate mutase, putative / phosphoglyceromutase, putative	R.YAGMLQYDGELKLPSR.Y	3	1839.93	31.24	4.0219	1	1	0.92	2	3293576	4127513	0.8	0	14N
AT1G09780.1	2,3-biphosphoglycerate-independent phosphoglycerate mutase, putative / phosphoglyceromutase, putative	K.TIAVIVLDGWGESAPDQYNCIHN*APTPAMDSLK.H	3	3583.74	92.53	9.85014	1	1	0.9	1	2025122	2872196	0.71	0	14N
AT1G09780.1	2,3-biphosphoglycerate-independent phosphoglycerate mutase, putative / phosphoglyceromutase, putative	K.DLETPGLANVAATVMNLHGFVAPSDYEPTLIEVVE.-	3	3710.87	22.76	7.5185	1	1	0.81	1	13297910	17712071	0.75	0	14N
AT1G09780.1	2,3-biphosphoglycerate-independent phosphoglycerate mutase, putative / phosphoglyceromutase, putative	K.DLETPGLAN*VAATVMN*LHGFVAPSDYEPTLIEVVE.-	3	3714.89	35.16	17.3698	1	1	0.82	1	8042508	16398328	0.49	0	14N
AT1G09780.1	2,3-biphosphoglycerate-independent phosphoglycerate mutase, putative / phosphoglyceromutase, putative	K.HGAPDTWTLIK.A	2	1237.66	26.1	4.60549	1	1	0.84	1	3058421	3997926	0.77	0	14N
AT1G09780.1	2,3-biphosphoglycerate-independent phosphoglycerate mutase, putative / phosphoglyceromutase, putative	K.MIFDAIEQVK.G	2	1192.63	39.06	5.11477	1	1	0.93	1	7580560	9075737	0.84	0	14N
AT1G09780.1	2,3-biphosphoglycerate-independent phosphoglycerate mutase, putative / phosphoglyceromutase, putative	R.TSGEYLTHNGVSTFACSETVK.F	3	2287.06	42.55	3.36678	1	1	0.92	1	1562995	1220489	1.28	0	15N
AT1G09780.1	2,3-biphosphoglycerate-independent phosphoglycerate mutase, putative / phosphoglyceromutase, putative	K.TIAVIVLDGWGESAPDQYNCIHN*APTPAMDSLK.H	3	3583.73	58.14	6.47375	1	1	0.92	1	2062728	2035346	1.01	0	15N
AT1G09780.1	2,3-biphosphoglycerate-independent phosphoglycerate mutase, putative / phosphoglyceromutase, putative	K.DLETPGLANVAATVMNLHGFVAPSDYEPTLIEVVE.-	3	3710.87	56.53	5.73993	3	3	0.88	1	18832052	15989276	1.18	0	15N
AT1G09780.1	2,3-biphosphoglycerate-independent phosphoglycerate mutase, putative / phosphoglyceromutase, putative	K.YVSESFETNTLHLVGLLSDGGVHSR.L	3	2716.36	40.66	2.8715	2	2	0.96	1	4155335	3645878	1.155	0.0212132	15N
AT1G09780.1	2,3-biphosphoglycerate-independent phosphoglycerate mutase, putative / phosphoglyceromutase, putative	R.YAGMLQYDGELK.L	2	1386.66	40.31	4.32695	1	1	0.89	2	1821565	1538358	1.18	0	15N
AT1G09780.1	2,3-biphosphoglycerate-independent phosphoglycerate mutase, putative / phosphoglyceromutase, putative	R.SGYFNEKLEEYVEIPSDSGISFNVQPK.M	3	3075.5	29.68	8.38894	1	1	0.53	2	4873275	5511263	0.88	0	15N
AT1G09780.1	2,3-biphosphoglycerate-independent phosphoglycerate mutase, putative / phosphoglyceromutase, putative	R.LDQLQLLIK.G	2	1082.68	41.67	4.80291	1	1	0.97	1	4568163	3620514	1.26	0	15N
AT1G09780.1	2,3-biphosphoglycerate-independent phosphoglycerate mutase, putative / phosphoglyceromutase, putative	K.LQILTSHTLKPVPIAIGGPGLAQGVR.F	3	2635.58	35.65	6.33641	1	1	0.95	1	3736293	3280413	1.14	0	15N
AT1G09780.1	2,3-biphosphoglycerate-independent phosphoglycerate mutase, putative / phosphoglyceromutase, putative	K.DLETPGLANVAATVMN*LHGFVAPSDYEPTLIEVVE.-	3	3712.88	55.01	11.2735	2	2	0.94	1	16879131	15247026	1.11	0	15N
AT1G09780.1	2,3-biphosphoglycerate-independent phosphoglycerate mutase, putative / phosphoglyceromutase, putative	K.RGWDAQVLGEAPHK.F	3	1562.81	20	2.49552	1	1	0.89	2	4136192	2814818	1.47	0	15N
AT1G09780.1	2,3-biphosphoglycerate-independent phosphoglycerate mutase, putative / phosphoglyceromutase, putative	K.LEEYVEIPSDSGISFNVQPK.M	2	2250.12	40.08	1.73325	1	1	0.92	2	2085875	1868531	1.12	0	15N
AT1G09780.1	2,3-biphosphoglycerate-independent phosphoglycerate mutase, putative / phosphoglyceromutase, putative	R.DVLDGSSVGFVETLEADLVALREN*GVDAQIASGGGR.M	3	3616.84	37.56	11.889	1	1	0.82	1	748524	1783642	0.42	0	15N
AT1G09780.1	2,3-biphosphoglycerate-independent phosphoglycerate mutase, putative / phosphoglyceromutase, putative	R.ENGVDAQIASGGGR.M	2	1329.64	50.92	3.91085	1	1	0.94	1	370155	290363	1.27	0	15N
AT1G10290.1	ADL6 (DYNAMIN-LIKE PROTEIN 6); GTPase	R.AAAASSYSDNSGTESSPR.A	2	1756.76	28.31	3.52923	1	1	0.92	1	44369	20834	2.13	0	15N
AT1G10840.2	TIF3H1; translation initiation factor	K.NFSWMDIFEEIPIK.V	2	1767.87	38.26	6.16564	1	1	0.69	2	1038349	957443	1.08	0	15N
AT1G11290.1	CRR22 (CHLORORESPIRATORY REDUCTION22); endonuclease	K.VGQ*VRVSM#LR.Q	3	1162.65	23.27	0.42287	1	1	0.84	1	926824	938647	0.99	0	15N
AT1G11580.1	PMEPCRA (METHYLESTERASE PCR A); enzyme inhibitor/ pectinesterase	R.VSADQTVINR.C	2	1101.59	62.04	2.99568	1	1	0.85	1	210277	407354	0.52	0	14N
AT1G11580.1	PMEPCRA (METHYLESTERASE PCR A); enzyme inhibitor/ pectinesterase	K.ITASSDLAPVK.G	2	1100.62	45.48	4.45205	1	1	0.96	1	1266976	1585705	0.8	0	14N
AT1G11580.1	PMEPCRA (METHYLESTERASE PCR A); enzyme inhibitor/ pectinesterase	R.IDAYQDTLYTHTLR.Q	3	1708.86	23.53	6.32004	1	1	0.89	1	2383061	3589909	0.66	0	14N
AT1G11580.1	PMEPCRA (METHYLESTERASE PCR A); enzyme inhibitor/ pectinesterase	K.LIQGGLWLKPTGVTFQEWL.-	2	2185.23	42.18	14.5982	1	1	0.66	1	2879767	5033700	0.57	0	14N
AT1G11580.1	PMEPCRA (METHYLESTERASE PCR A); enzyme inhibitor/ pectinesterase	K.TVNEAVAAAPENSNTR.Y	2	1642.8	29.73	2.55661	2	2	0.95	1	1744505	2468264	0.695	0.0212132	14N
AT1G11580.1	PMEPCRA (METHYLESTERASE PCR A); enzyme inhibitor/ pectinesterase	R.EDQNQNTAISIQK.C	2	1487.74	49.69	5.31011	1	1	0.94	1	606785	798220	0.76	0	14N
AT1G11580.1	PMEPCRA (METHYLESTERASE PCR A); enzyme inhibitor/ pectinesterase	K.ITASSDLAPVK.G	2	1100.62	45.61	4.17948	1	1	0.99	1	3954065	2568878	1.54	0	15N
AT1G11580.1	PMEPCRA (METHYLESTERASE PCR A); enzyme inhibitor/ pectinesterase	R.IDAYQDTLYTHTLR.Q	3	1708.86	25.66	4.15484	1	1	0.93	1	5770677	3989371	1.45	0	15N
AT1G11580.1	PMEPCRA (METHYLESTERASE PCR A); enzyme inhibitor/ pectinesterase	K.LIQGGLWLKPTGVTFQEWL.-	2	2185.21	39.88	2.19659	2	2	0.87	1	4453198	4029415	1.11	0	15N
AT1G11580.1	PMEPCRA (METHYLESTERASE PCR A); enzyme inhibitor/ pectinesterase	K.TVNEAVAAAPENSNTR.Y	2	1642.81	66.04	4.74799	2	2	0.97	1	3581269	2486660	1.44	0	15N
AT1G11580.1	PMEPCRA (METHYLESTERASE PCR A); enzyme inhibitor/ pectinesterase	R.EDQNQNTAISIQK.C	2	1487.73	39.73	2.75588	1	1	0.96	1	1822042	1254851	1.45	0	15N
AT1G11840.2	ATGLX1 (GLYOXALASE I HOMOLOG); lactoylglutathione lyase/ metal ion binding	K.DPDGYTFELIQR.G	2	1452.7	63.28	2.96001	1	1	0.92	2	3603515	3075328	1.17	0	14N
AT1G11840.2	ATGLX1 (GLYOXALASE I HOMOLOG); lactoylglutathione lyase/ metal ion binding	R.FLHVVYR.V	3	932.536	21.28	4.82558	1	1	0.97	2	15220293	14755098	1.03	0	14N
AT1G11840.2	ATGLX1 (GLYOXALASE I HOMOLOG); lactoylglutathione lyase/ metal ion binding	K.IVSFLDPDGWK.T	2	1275.67	33.71	5.80093	1	1	0.9	1	15040782	13863580	1.08	0	14N
AT1G11840.2	ATGLX1 (GLYOXALASE I HOMOLOG); lactoylglutathione lyase/ metal ion binding	R.TIEFYTEVFGMK.L	2	1463.72	35.43	7.78844	1	1	0.85	2	7215749	5953346	1.21	0	14N
AT1G11840.2	ATGLX1 (GLYOXALASE I HOMOLOG); lactoylglutathione lyase/ metal ion binding	R.FLHVVYR.V	3	932.537	22.2	6.4341	1	1	0.97	2	13349993	17048360	0.78	0	15N
AT1G11840.2	ATGLX1 (GLYOXALASE I HOMOLOG); lactoylglutathione lyase/ metal ion binding	K.IVSFLDPDGWK.T	2	1275.67	32.65	6.34967	1	1	0.88	1	12816046	15007947	0.85	0	15N
AT1G11840.2	ATGLX1 (GLYOXALASE I HOMOLOG); lactoylglutathione lyase/ metal ion binding	K.TVLVDNKDFLK.E	3	1290.73	25.13	6.12059	2	2	0.93	1	2833417	2005890	1.13	0.39598	15N
AT1G11840.2	ATGLX1 (GLYOXALASE I HOMOLOG); lactoylglutathione lyase/ metal ion binding	K.DPDGYTFELIQR.G	2	1452.7	73.77	1.72094	2	2	0.9	2	6245269	6945062	0.9	0	15N
AT1G11860.1	aminomethyltransferase, putative	R.TGYTGEDGFEISVPDEHAVDLAK.A	3	2449.13	22.82	-3.91975	1	1	0.9	1	1854600	1657883	1.12	0	15N
AT1G11910.1	aspartyl protease family protein	K.TVVDQYGQTILDLLLSETQPK.K	3	2360.27	61.06	6.1434	3	3	0.95	1	13856699	15172795	0.893333	0.0288675	14N
AT1G11910.1	aspartyl protease family protein	K.QGLIKEPVFSFWLNR.N	3	1833.01	24.62	6.00109	1	1	0.9	1	3616465	3632871	1	0	14N
AT1G11910.1	aspartyl protease family protein	K.CYFSLACLLHPK.Y	3	1507.75	46.94	7.75996	1	1	0.88	1	1434140	1438782	1	0	14N
AT1G11910.1	aspartyl protease family protein	K.TVVDQ*YGQTILDLLLSETQPK.K	3	2361.27	38.75	11.8158	1	1	0.89	1	9573700	15274951	0.63	0	14N
AT1G11910.1	aspartyl protease family protein	K.FDGILGLGFQEISVGK.A	2	1678.91	46.81	7.2071	1	1	0.89	1	2781083	3869860	0.72	0	14N
AT1G11910.1	aspartyl protease family protein	K.FDGILGLGFQEISVGK.A	2	1678.91	53.54	5.71803	1	1	0.94	1	2999431	2985463	1	0	15N
AT1G11910.1	aspartyl protease family protein	K.TVVDQYGQTILDLLLSETQPK.K	2	2360.26	91.2	3.05052	5	5	0.95	1	1949250	2207754	1	0.109545	15N
AT1G11910.1	aspartyl protease family protein	K.QGLIKEPVFSFWLNR.N	3	1833.01	36.68	4.80087	1	1	0.96	1	2822346	2549320	1.11	0	15N
AT1G11910.1	aspartyl protease family protein	R.ILNYVNELCER.L	2	1421.71	25.76	5.76772	1	1	0.79	1	6640589	7108211	0.93	0	15N
AT1G12000.1	pyrophosphate--fructose-6-phosphate 1-phosphotransferase beta subunit, putative / pyrophosphate-dependent 6-phosphofructose-1-kinase, putative	R.ASVYSEVQSSR.I	2	1211.59	34.08	2.55863	1	1	0.94	1	696123	854439	0.81	0	14N
AT1G12000.1	pyrophosphate--fructose-6-phosphate 1-phosphotransferase beta subunit, putative / pyrophosphate-dependent 6-phosphofructose-1-kinase, putative	K.IVEGPASSAAGNPDEIAK.L	2	1724.87	55.97	4.05829	1	1	0.97	1	1683639	2310812	0.73	0	14N
AT1G12000.1	pyrophosphate--fructose-6-phosphate 1-phosphotransferase beta subunit, putative / pyrophosphate-dependent 6-phosphofructose-1-kinase, putative	R.ASVYSEVQSSR.I	2	1211.59	49.06	1.65073	1	1	0.97	1	985410	791343	1.25	0	15N
AT1G12000.1	pyrophosphate--fructose-6-phosphate 1-phosphotransferase beta subunit, putative / pyrophosphate-dependent 6-phosphofructose-1-kinase, putative	K.IGVVLSGGQAPGGHNVISGLFDYLQER.A	3	2782.46	33.3	6.07379	1	1	0.91	1	4881971	4045074	1.21	0	15N
AT1G12000.1	pyrophosphate--fructose-6-phosphate 1-phosphotransferase beta subunit, putative / pyrophosphate-dependent 6-phosphofructose-1-kinase, putative	K.MLIQMVETELEK.R	2	1462.75	47.33	3.48659	1	1	0.97	2	2817476	2373849	1.19	0	15N
AT1G12000.1	pyrophosphate--fructose-6-phosphate 1-phosphotransferase beta subunit, putative / pyrophosphate-dependent 6-phosphofructose-1-kinase, putative	R.YISPGPIQFTGPGSDSLSHTLLLELGAQ.-	3	2898.5	21.84	1.29264	1	1	0	1	6696941	9430347	0.71	0	15N
AT1G12000.1	pyrophosphate--fructose-6-phosphate 1-phosphotransferase beta subunit, putative / pyrophosphate-dependent 6-phosphofructose-1-kinase, putative	R.DLTAVGSPENAPAK.G	2	1368.7	51.13	3.43392	1	1	0.99	1	866925	771690	1.12	0	15N
AT1G12000.1	pyrophosphate--fructose-6-phosphate 1-phosphotransferase beta subunit, putative / pyrophosphate-dependent 6-phosphofructose-1-kinase, putative	K.IVEGPASSAAGNPDEIAK.L	2	1724.87	75.38	3.01473	1	1	0.99	1	2194205	1883656	1.16	0	15N
AT1G12080.2	unknown protein	K.TVEETVVETEVTQQPEESVPAVTEQK.S	3	2885.43	27.84	5.30254	1	1	0.96	1	2152559	3981066	0.54	0	14N
AT1G12080.2	unknown protein	K.TVEETVVETEVTQQPEESVPAVTEQK.S	3	2885.42	38.38	2.04477	1	1	0.98	1	4773912	3549418	1.34	0	15N
AT1G12240.1	ATBETAFRUCT4; beta-fructofuranosidase/ hydrolase, hydrolyzing O-glycosyl compounds	R.ILVDHSIVEAFGQGGR.T	3	1696.91	28.28	4.83235	1	1	0.92	1	2393630	2460268	0.97	0	15N
AT1G12240.1	ATBETAFRUCT4; beta-fructofuranosidase/ hydrolase, hydrolyzing O-glycosyl compounds	K.TGISLVYDTIDFK.T	2	1470.77	39.27	3.46758	1	1	0.89	1	2000074	1898939	1.05	0	15N
AT1G12310.1	calmodulin, putative	R.SLGGNPTQAQLK.S	2	1212.66	32.3	3.46348	1	1	0.96	1	433998	617254	0.7	0	14N
AT1G12310.1	calmodulin, putative	R.SLGGNPTQAQLK.S	2	1212.66	39.2	4.20565	1	1	0.96	1	682355	614914	1.11	0	15N
AT1G12840.1	DET3 (DE-ETIOLATED 3); proton-transporting ATPase, rotational mechanism	K.EVVDNIQSQVAK.I	2	1328.71	56.44	3.38677	1	1	0.94	1	645990	966535	0.67	0	14N
AT1G12840.1	DET3 (DE-ETIOLATED 3); proton-transporting ATPase, rotational mechanism	R.VGTLDSLLALGDDLLK.S	2	1641.94	86.6	6.21221	2	2	0.8	1	4277556	5621043	0.76	0	14N
AT1G12840.1	DET3 (DE-ETIOLATED 3); proton-transporting ATPase, rotational mechanism	R.DLSNLVKPEDIVESEHLVTLLAVVPK.Y	4	2856.6	27.49	3.78073	1	1	0.85	1	3799246	5347324	0.71	0	14N
AT1G12840.1	DET3 (DE-ETIOLATED 3); proton-transporting ATPase, rotational mechanism	R.VGTLDSLLALGDDLLK.S	2	1641.93	75.68	4.38509	3	3	0.91	1	4465244	4188733	1.07333	0.0057735	15N
AT1G12840.1	DET3 (DE-ETIOLATED 3); proton-transporting ATPase, rotational mechanism	R.ISGVESNALTVDGVPVDSYLTR.F	2	2291.18	60.47	2.31323	1	1	0.96	1	2226904	1964496	1.13	0	15N
AT1G12840.1	DET3 (DE-ETIOLATED 3); proton-transporting ATPase, rotational mechanism	K.EVVDNIQSQVAK.I	2	1328.7	53.91	0.150523	1	1	0.97	1	1130056	886950	1.27	0	15N
AT1G13060.1	PBE1; endopeptidase/ peptidase/ threonine-type endopeptidase	K.LSGDDVGELHYHYYPVAPATAEQ*VMEEATAE.-	3	3392.54	40.38	8.45981	1	1	0.95	1	2367162	2102200	1.13	0	15N
AT1G13060.1	PBE1; endopeptidase/ peptidase/ threonine-type endopeptidase	K.LLANMLYSYR.G	2	1242.65	26.89	1.93135	1	1	0.96	2	3591620	2807367	1.28	0	15N
AT1G13320.1	PP2AA3 (PROTEIN PHOSPHATASE 2A SUBUNIT A3); binding / protein phosphatase type 2A regulator	K.LDQVNQVIGIDLLSQSLLPAIVELAEDR.H	3	3061.7	31	4.62165	1	1	0.86	5	963914	1457676	0.66	0	14N
AT1G13320.1	PP2AA3 (PROTEIN PHOSPHATASE 2A SUBUNIT A3); binding / protein phosphatase type 2A regulator	K.LDQVNQVIGIDLLSQSLLPAIVELAEDR.H	3	3060.68	28.62	0.13069	2	2	0.82	5	2715933	2816682	0.96	0	15N
AT1G13440.1	GAPC2 (GLYCERALDEHYDE-3-PHOSPHATE DEHYDROGENASE C2); NAD or NADH binding / binding / catalytic/ glyceraldehyde-3-phosphate dehydrogenase (phosphorylating)/ glyceraldehyde-3-phosphate dehydrogenase	K.AGIALSDKFVK.L	2	1147.67	43.65	3.31106	3	3	0.95	3	7210860	9037268	0.76	0.034641	14N
AT1G13440.1	GAPC2 (GLYCERALDEHYDE-3-PHOSPHATE DEHYDROGENASE C2); NAD or NADH binding / binding / catalytic/ glyceraldehyde-3-phosphate dehydrogenase (phosphorylating)/ glyceraldehyde-3-phosphate dehydrogenase	K.GILGYTEDDVVSTDFVGDNR.S	2	2171.02	105.88	4.09948	4	4	0.78	3	15661000	17074475	0.92	0	14N
AT1G13440.1	GAPC2 (GLYCERALDEHYDE-3-PHOSPHATE DEHYDROGENASE C2); NAD or NADH binding / binding / catalytic/ glyceraldehyde-3-phosphate dehydrogenase (phosphorylating)/ glyceraldehyde-3-phosphate dehydrogenase	R.FGIVEGLMTTVHSITATQK.T	2	2032.08	90.72	4.72424	15	15	0.81	3	17271901	21880936	0.796	0.0445293	14N
AT1G13440.1	GAPC2 (GLYCERALDEHYDE-3-PHOSPHATE DEHYDROGENASE C2); NAD or NADH binding / binding / catalytic/ glyceraldehyde-3-phosphate dehydrogenase (phosphorylating)/ glyceraldehyde-3-phosphate dehydrogenase	K.LVSWYDNEWGYSSR.V	2	1760.79	103.63	3.23719	4	4	0.89	3	58381768	72070015	0.81	0	14N
AT1G13440.1	GAPC2 (GLYCERALDEHYDE-3-PHOSPHATE DEHYDROGENASE C2); NAD or NADH binding / binding / catalytic/ glyceraldehyde-3-phosphate dehydrogenase (phosphorylating)/ glyceraldehyde-3-phosphate dehydrogenase	R.VVDLIVHMSKA.-	2	1210.69	31.79	3.96471	2	2	0.9	3	2147004	2958410	0.755	0.0353553	14N
AT1G13440.1	GAPC2 (GLYCERALDEHYDE-3-PHOSPHATE DEHYDROGENASE C2); NAD or NADH binding / binding / catalytic/ glyceraldehyde-3-phosphate dehydrogenase (phosphorylating)/ glyceraldehyde-3-phosphate dehydrogenase	R.VPTVDVSVVDLTVR.L	2	1497.86	91.05	5.27423	3	3	0.92	3	23958585	29480026	0.81	0	14N
AT1G13440.1	GAPC2 (GLYCERALDEHYDE-3-PHOSPHATE DEHYDROGENASE C2); NAD or NADH binding / binding / catalytic/ glyceraldehyde-3-phosphate dehydrogenase (phosphorylating)/ glyceraldehyde-3-phosphate dehydrogenase	R.VVDLIVHMSK.A	2	1139.65	37.71	1.40395	4	4	0.96	3	7201134	7296570	0.89	0.11547	14N
AT1G13440.1	GAPC2 (GLYCERALDEHYDE-3-PHOSPHATE DEHYDROGENASE C2); NAD or NADH binding / binding / catalytic/ glyceraldehyde-3-phosphate dehydrogenase (phosphorylating)/ glyceraldehyde-3-phosphate dehydrogenase	R.IGINGFGR.I	2	832.466	57.11	3.36351	1	1	0.92	3	28171791	34216559	0.82	0	14N
AT1G13440.1	GAPC2 (GLYCERALDEHYDE-3-PHOSPHATE DEHYDROGENASE C2); NAD or NADH binding / binding / catalytic/ glyceraldehyde-3-phosphate dehydrogenase (phosphorylating)/ glyceraldehyde-3-phosphate dehydrogenase	R.AASFNIIPSSTGAAK.A	2	1433.77	50.26	4.11506	3	3	0.97	3	82690270	106933944	0.77	0	14N
AT1G13440.1	GAPC2 (GLYCERALDEHYDE-3-PHOSPHATE DEHYDROGENASE C2); NAD or NADH binding / binding / catalytic/ glyceraldehyde-3-phosphate dehydrogenase (phosphorylating)/ glyceraldehyde-3-phosphate dehydrogenase	K.SDLDIVSNASCTTNCLAPLAK.V	2	2249.08	77.54	0.755866	1	1	0.97	2	7719521	8553608	0.9	0	14N
AT1G13440.1	GAPC2 (GLYCERALDEHYDE-3-PHOSPHATE DEHYDROGENASE C2); NAD or NADH binding / binding / catalytic/ glyceraldehyde-3-phosphate dehydrogenase (phosphorylating)/ glyceraldehyde-3-phosphate dehydrogenase	R.DDVELVAVNDPFITTEYMTYMFK.Y	2	2740.29	67.74	5.69286	8	8	0.89	3	36151867	45257802	0.8625	0.0517549	14N
AT1G13440.1	GAPC2 (GLYCERALDEHYDE-3-PHOSPHATE DEHYDROGENASE C2); NAD or NADH binding / binding / catalytic/ glyceraldehyde-3-phosphate dehydrogenase (phosphorylating)/ glyceraldehyde-3-phosphate dehydrogenase	R.IGIN*GFGR.I	2	833.45	35.79	3.35954	4	4	0.93	3	14439861	15944668	0.89	0.023094	14N
AT1G13440.1	GAPC2 (GLYCERALDEHYDE-3-PHOSPHATE DEHYDROGENASE C2); NAD or NADH binding / binding / catalytic/ glyceraldehyde-3-phosphate dehydrogenase (phosphorylating)/ glyceraldehyde-3-phosphate dehydrogenase	K.TLLFGEKPVTVFGIR.N	3	1675.99	54.88	6.98102	8	8	0.85	3	10343970	11898444	0.80625	0.0399777	14N
AT1G13440.1	GAPC2 (GLYCERALDEHYDE-3-PHOSPHATE DEHYDROGENASE C2); NAD or NADH binding / binding / catalytic/ glyceraldehyde-3-phosphate dehydrogenase (phosphorylating)/ glyceraldehyde-3-phosphate dehydrogenase	K.DAPMFVVGVNEHEYK.S	2	1733.82	45.96	3.57593	1	1	0.9	2	2033606	2652573	0.77	0	14N
AT1G13440.1	GAPC2 (GLYCERALDEHYDE-3-PHOSPHATE DEHYDROGENASE C2); NAD or NADH binding / binding / catalytic/ glyceraldehyde-3-phosphate dehydrogenase (phosphorylating)/ glyceraldehyde-3-phosphate dehydrogenase	K.AGIALSDKFVK.L	2	1147.67	58.58	2.0912	1	1	0.95	3	5828577	4726511	1.23	0	15N
AT1G13440.1	GAPC2 (GLYCERALDEHYDE-3-PHOSPHATE DEHYDROGENASE C2); NAD or NADH binding / binding / catalytic/ glyceraldehyde-3-phosphate dehydrogenase (phosphorylating)/ glyceraldehyde-3-phosphate dehydrogenase	K.GILGYTEDDVVSTDFVGDNR.S	2	2171.02	113.15	4.32978	3	3	0.89	3	28585672	21937055	1.3	0	15N
AT1G13440.1	GAPC2 (GLYCERALDEHYDE-3-PHOSPHATE DEHYDROGENASE C2); NAD or NADH binding / binding / catalytic/ glyceraldehyde-3-phosphate dehydrogenase (phosphorylating)/ glyceraldehyde-3-phosphate dehydrogenase	K.LVSWYDNEWGYSSR.V	2	1760.79	84.91	3.52115	6	6	0.91	3	79990652	69619469	1.15333	0.00516398	15N
AT1G13440.1	GAPC2 (GLYCERALDEHYDE-3-PHOSPHATE DEHYDROGENASE C2); NAD or NADH binding / binding / catalytic/ glyceraldehyde-3-phosphate dehydrogenase (phosphorylating)/ glyceraldehyde-3-phosphate dehydrogenase	R.VPTVDVSVVDLTVR.L	2	1497.86	112.37	5.54128	8	8	0.9	3	121097798	107198862	1.15375	0.0671751	15N
AT1G13440.1	GAPC2 (GLYCERALDEHYDE-3-PHOSPHATE DEHYDROGENASE C2); NAD or NADH binding / binding / catalytic/ glyceraldehyde-3-phosphate dehydrogenase (phosphorylating)/ glyceraldehyde-3-phosphate dehydrogenase	R.AASFNIIPSSTGAAK.A	2	1433.77	51.24	4.3243	4	4	0.97	3	118313264	108684634	1.09	0	15N
AT1G13440.1	GAPC2 (GLYCERALDEHYDE-3-PHOSPHATE DEHYDROGENASE C2); NAD or NADH binding / binding / catalytic/ glyceraldehyde-3-phosphate dehydrogenase (phosphorylating)/ glyceraldehyde-3-phosphate dehydrogenase	K.DAPMFVVGVN*EHEYKSDLDIVSNASCTTNCLAPLAK.V	4	3966.9	23.5	9.84539	1	1	0.88	2	19507943	16767494	1.16	0	15N
AT1G13440.1	GAPC2 (GLYCERALDEHYDE-3-PHOSPHATE DEHYDROGENASE C2); NAD or NADH binding / binding / catalytic/ glyceraldehyde-3-phosphate dehydrogenase (phosphorylating)/ glyceraldehyde-3-phosphate dehydrogenase	K.SDLDIVSNASCTTNCLAPLAK.V	2	2249.08	96.93	2.71223	3	3	0.9	2	24751375	20723033	1.19	0	15N
AT1G13440.1	GAPC2 (GLYCERALDEHYDE-3-PHOSPHATE DEHYDROGENASE C2); NAD or NADH binding / binding / catalytic/ glyceraldehyde-3-phosphate dehydrogenase (phosphorylating)/ glyceraldehyde-3-phosphate dehydrogenase	R.IGIN*GFGR.I	2	833.452	24.83	5.75921	1	1	0.98	3	6688754	5191549	1.29	0	15N
AT1G13440.1	GAPC2 (GLYCERALDEHYDE-3-PHOSPHATE DEHYDROGENASE C2); NAD or NADH binding / binding / catalytic/ glyceraldehyde-3-phosphate dehydrogenase (phosphorylating)/ glyceraldehyde-3-phosphate dehydrogenase	K.DAPMFVVGVNEHEYK.S	2	1733.82	75.82	1.26888	3	3	0.94	2	10160947	8020672	1.25667	0.023094	15N
AT1G13440.1	GAPC2 (GLYCERALDEHYDE-3-PHOSPHATE DEHYDROGENASE C2); NAD or NADH binding / binding / catalytic/ glyceraldehyde-3-phosphate dehydrogenase (phosphorylating)/ glyceraldehyde-3-phosphate dehydrogenase	R.FGIVEGLMTTVHSITATQK.T	2	2032.08	114.3	3.88765	14	14	0.96	3	26543829	23330599	1.08286	0.0774029	15N
AT1G13440.1	GAPC2 (GLYCERALDEHYDE-3-PHOSPHATE DEHYDROGENASE C2); NAD or NADH binding / binding / catalytic/ glyceraldehyde-3-phosphate dehydrogenase (phosphorylating)/ glyceraldehyde-3-phosphate dehydrogenase	R.VVDLIVHMSKA.-	3	1210.69	20.66	6.44265	1	1	0.99	3	7475008	6125387	1.22	0	15N
AT1G13440.1	GAPC2 (GLYCERALDEHYDE-3-PHOSPHATE DEHYDROGENASE C2); NAD or NADH binding / binding / catalytic/ glyceraldehyde-3-phosphate dehydrogenase (phosphorylating)/ glyceraldehyde-3-phosphate dehydrogenase	R.VVDLIVHMSK.A	2	1139.65	40.46	2.10592	5	5	0.93	3	16824491	12561759	1.16	0.164317	15N
AT1G13440.1	GAPC2 (GLYCERALDEHYDE-3-PHOSPHATE DEHYDROGENASE C2); NAD or NADH binding / binding / catalytic/ glyceraldehyde-3-phosphate dehydrogenase (phosphorylating)/ glyceraldehyde-3-phosphate dehydrogenase	R.DDVELVAVNDPFITTEYMTYMFK.Y	2	2740.28	88.33	2.33553	12	12	0.92	3	73883668	67428016	1.1075	0.0200567	15N
AT1G13440.1	GAPC2 (GLYCERALDEHYDE-3-PHOSPHATE DEHYDROGENASE C2); NAD or NADH binding / binding / catalytic/ glyceraldehyde-3-phosphate dehydrogenase (phosphorylating)/ glyceraldehyde-3-phosphate dehydrogenase	R.NPEDIPWGEAGADFVVESTGVFTDKDK.A	3	2922.38	40.06	5.30393	2	2	0.86	2	15171472	11425904	1.335	0.00707107	15N
AT1G13440.1	GAPC2 (GLYCERALDEHYDE-3-PHOSPHATE DEHYDROGENASE C2); NAD or NADH binding / binding / catalytic/ glyceraldehyde-3-phosphate dehydrogenase (phosphorylating)/ glyceraldehyde-3-phosphate dehydrogenase	K.TLLFGEKPVTVFGIR.N	2	1675.98	65.5	2.148	10	10	0.91	3	23674224	18155275	1.139	0.111101	15N
AT1G13510.1	unknown protein	K.VDGQEISR.G	2	902.455	24.54	1.99456	1	1	0.97	1	6561661	4755018	1.38	0	14N
AT1G13790.1	XH/XS domain-containing protein / XS zinc finger domain-containing protein	K.NLM#ATQ*EQ*N*K.A	2	1194.53	23.55	11.9714	1	1	0.87	1	597976	378682	1.58	0	15N
AT1G14760.1	KNATM (KNOX ARABIDOPSIS THALIANA MEINOX); transcription activator	K.FILPR.K	2	644.413	23.63	6.5176	1	1	0.97	6	9525039	9309988	1.02	0	15N
AT1G14810.1	semialdehyde dehydrogenase family protein	R.MVVSTYQAASGAGAAAMEELVQQTR.E	3	2568.25	32.32	5.80164	1	1	0.95	1	1858941	2190244	0.85	0	14N
AT1G14810.1	semialdehyde dehydrogenase family protein	K.GAALNAVQIAEMLL.-	2	1412.78	24	-1.06174	1	1	0.82	1	619188	669354	0.93	0	15N
AT1G14980.1	CPN10 (CHAPERONIN 10); chaperone binding	K.EGDTVLLPEYGGTQVK.L	2	1704.87	49.51	2.52219	1	1	0.86	1	3089405	4816067	0.64	0	14N
AT1G14980.1	CPN10 (CHAPERONIN 10); chaperone binding	K.EGDTVLLPEYGGTQVK.L	2	1704.87	31.27	1.93564	1	1	0.96	1	4386455	4663462	0.94	0	15N
AT1G14980.1	CPN10 (CHAPERONIN 10); chaperone binding	K.TESGILLPEK.S	2	1085.61	42.38	2.67132	1	1	0.97	1	2329749	2187817	1.06	0	15N
AT1G15690.1	AVP1; ATPase/ hydrogen-translocating pyrophosphatase	K.AAVIGDTIGDPLKDTSGPSLNILIK.L	3	2507.4	20.14	1.79469	1	1	0.95	1	2429235	2764625	0.88	0	15N
AT1G15690.1	AVP1; ATPase/ hydrogen-translocating pyrophosphatase	K.VIIGLLVGAMLPYWFSAMTMK.S	3	2340.27	21.26	7.52056	1	1	0.55	2	635516	709684	0.9	0	15N
AT1G15930.2	40S ribosomal protein S12 (RPS12A)	K.DFGEETTALSIVNK.H	2	1522.76	68.39	1.37908	1	1	0.83	1	2195717	2756313	0.8	0	14N
AT1G15930.2	40S ribosomal protein S12 (RPS12A)	R.VAQLVVLAEDCNQPDYVK.L	2	2060.04	72.67	3.98052	1	1	0.84	1	3866867	6105687	0.63	0	14N
AT1G15930.2	40S ribosomal protein S12 (RPS12A)	R.VAQLVVLAEDCNQPDYVK.L	2	2060.03	70.06	0.776687	1	1	0.91	1	4195785	4996750	0.84	0	15N
AT1G15930.2	40S ribosomal protein S12 (RPS12A)	K.DFGEETTALSIVNK.H	2	1522.77	86.47	6.69837	1	1	0.84	1	3046076	2908598	1.05	0	15N
AT1G16030.1	Hsp70b (heat shock protein 70B); ATP binding	K.ATAGDTHLGGEDFDNR.L	2	1674.73	40.42	1.19422	3	3	0.97	7	598842	744051	0.766667	0.0288675	14N
AT1G16030.1	Hsp70b (heat shock protein 70B); ATP binding	R.IINEPTAAAIAYGLDK.K	2	1658.91	65.49	5.66642	2	2	0.93	10	5218997	7093338	0.74	0	14N
AT1G16030.1	Hsp70b (heat shock protein 70B); ATP binding	R.IINEPTAAAIAYGLDKK.G	2	1787	62.16	4.53276	1	1	0.89	10	2347495	2451899	0.96	0	14N
AT1G16030.1	Hsp70b (heat shock protein 70B); ATP binding	K.NAVVTVPAYFNDSQR.Q	2	1679.84	44.48	5.47673	2	2	0.97	7	22541767	26783720	0.84	0	14N
AT1G16030.1	Hsp70b (heat shock protein 70B); ATP binding	K.ATAGDTHLGGEDFDNR.L	2	1674.74	47.4	3.34382	2	2	0.98	7	876820	744414	1.105	0.106066	15N
AT1G16030.1	Hsp70b (heat shock protein 70B); ATP binding	R.IINEPTAAAIAYGLDK.K	2	1658.9	71.02	3.61686	2	2	0.97	10	8681053	8055872	1.08	0	15N
AT1G16030.1	Hsp70b (heat shock protein 70B); ATP binding	R.IINEPTAAAIAYGLDKK.G	2	1787	67.32	2.90992	2	2	0.95	10	2326862	1818726	1.165	0.162635	15N
AT1G16030.1	Hsp70b (heat shock protein 70B); ATP binding	K.NAVVTVPAYFNDSQR.Q	2	1679.84	60.3	2.97648	2	2	0.97	7	27320508	22251131	1.23	0	15N
AT1G16300.1	GAPCP-2; NAD or NADH binding / binding / catalytic/ glyceraldehyde-3-phosphate dehydrogenase (phosphorylating)/ glyceraldehyde-3-phosphate dehydrogenase	R.GASQNIIPSSTGAAK.A	2	1400.74	31.5	2.78425	1	1	0.88	2	1442812	1941997	0.74	0	14N
AT1G16300.1	GAPCP-2; NAD or NADH binding / binding / catalytic/ glyceraldehyde-3-phosphate dehydrogenase (phosphorylating)/ glyceraldehyde-3-phosphate dehydrogenase	K.LTGM#AFR.V	2	810.417	30.47	3.57842	1	1	0.97	2	6237868	7539357	0.83	0	14N
AT1G16300.1	GAPCP-2; NAD or NADH binding / binding / catalytic/ glyceraldehyde-3-phosphate dehydrogenase (phosphorylating)/ glyceraldehyde-3-phosphate dehydrogenase	K.LVSWYDNEWGYSNR.V	2	1788.81	35.45	6.56976	1	1	0.9	2	3128389	2497970	1.25	0	15N
AT1G16300.1	GAPCP-2; NAD or NADH binding / binding / catalytic/ glyceraldehyde-3-phosphate dehydrogenase (phosphorylating)/ glyceraldehyde-3-phosphate dehydrogenase	R.GASQNIIPSSTGAAK.A	2	1400.74	36.63	3.71234	1	1	0.99	2	2473260	1968195	1.26	0	15N
AT1G16300.1	GAPCP-2; NAD or NADH binding / binding / catalytic/ glyceraldehyde-3-phosphate dehydrogenase (phosphorylating)/ glyceraldehyde-3-phosphate dehydrogenase	K.VVHEEFGILEGLMTTVHATTATQK.T	4	2611.36	43.99	7.54402	2	2	0.71	2	5601707	4912845	1.14	0	15N
AT1G16700.1	NADH-ubiquinone oxidoreductase 23 kDa subunit, mitochondrial, putative	K.LLENGDRWETEIAENLR.S	3	2057.04	20.94	9.0908	1	1	0.78	2	1736163	1538002	1.13	0	15N
AT1G17170.1	ATGSTU24 (GLUTATHIONE S-TRANSFERASE TAU 24); glutathione binding / glutathione transferase	K.FWADFIDKK.V	3	1168.61	37.02	6.07565	2	2	0.92	3	26351662	42423931	0.62	0	14N
AT1G17170.1	ATGSTU24 (GLUTATHIONE S-TRANSFERASE TAU 24); glutathione binding / glutathione transferase	K.VITFISER.R	2	963.552	27.7	5.60429	1	1	0.86	1	1576714	1860550	0.85	0	15N
AT1G17170.1	ATGSTU24 (GLUTATHIONE S-TRANSFERASE TAU 24); glutathione binding / glutathione transferase	K.FWADFIDKK.V	3	1168.61	44.85	6.50351	4	4	0.99	3	5310018	3454353	1.3925	0.0984463	15N
AT1G17180.1	ATGSTU25 (GLUTATHIONE S-TRANSFERASE TAU 25); glutathione transferase	K.FWGDFIDKK.V	3	1154.59	20.98	6.23601	1	1	0.9	1	1600120	1691733	0.95	0	15N
AT1G17180.1	ATGSTU25 (GLUTATHIONE S-TRANSFERASE TAU 25); glutathione transferase	K.FGSFSIEAECPK.L	2	1370.63	55.12	0.510716	1	1	0.75	1	1433114	1241482	1.15	0	15N
AT1G17190.1	ATGSTU26 (ARABIDOPSIS THALIANA GLUTATHIONE S-TRANSFERASE TAU 26); glutathione transferase	K.FGEFSIETEFPILTTWTK.R	2	2145.1	50.63	12.6336	1	1	0.85	1	2799313	4163301	0.67	0	14N
AT1G17190.1	ATGSTU26 (ARABIDOPSIS THALIANA GLUTATHIONE S-TRANSFERASE TAU 26); glutathione transferase	K.TPLLIEMNPIHK.K	3	1404.8	41.46	5.2677	1	1	0.88	1	2636405	4110422	0.64	0	14N
AT1G17190.1	ATGSTU26 (ARABIDOPSIS THALIANA GLUTATHIONE S-TRANSFERASE TAU 26); glutathione transferase	K.FGEFSIETEFPILTTWTK.R	2	2145.1	36.5	10.5824	1	1	0.88	1	3882046	3868470	1	0	15N
AT1G17190.1	ATGSTU26 (ARABIDOPSIS THALIANA GLUTATHIONE S-TRANSFERASE TAU 26); glutathione transferase	R.FWAEFIDKK.F	3	1182.62	28.05	6.0882	1	1	0.85	1	1719110	1339977	1.28	0	15N
AT1G17190.1	ATGSTU26 (ARABIDOPSIS THALIANA GLUTATHIONE S-TRANSFERASE TAU 26); glutathione transferase	K.TPLLIEMNPIHK.K	3	1404.79	43.67	4.84059	1	1	0.95	1	4204722	3551529	1.18	0	15N
AT1G17260.1	AHA10 (Autoinhibited H(+)-ATPase isoform 10); ATPase/ ATPase, coupled to transmembrane movement of ions, phosphorylative mechanism / cation-transporting ATPase	K.LGDIIPADAR.L	2	1039.58	24.9	3.84773	1	1	0.92	7	5350596	6813921	0.79	0	14N
AT1G17260.1	AHA10 (Autoinhibited H(+)-ATPase isoform 10); ATPase/ ATPase, coupled to transmembrane movement of ions, phosphorylative mechanism / cation-transporting ATPase	K.ADIGIAVADATDAAR.S	2	1428.74	76.82	5.59938	1	1	0.92	9	1683117	1570728	1.07	0	15N
AT1G17260.1	AHA10 (Autoinhibited H(+)-ATPase isoform 10); ATPase/ ATPase, coupled to transmembrane movement of ions, phosphorylative mechanism / cation-transporting ATPase	K.LGDIIPADAR.L	2	1039.58	24.64	4.04012	1	1	0.97	7	7528553	5767841	1.31	0	15N
AT1G17290.1	AlaAT1 (ALANINE AMINOTRANSFERAS); ATP binding / L-alanine:2-oxoglutarate aminotransferase	R.ALAVINPGNPTGQVLSEENQR.D	3	2207.15	29.4	0.292547	1	1	0.89	1	1514846	1388958	1.09	0	15N
AT1G17290.1	AlaAT1 (ALANINE AMINOTRANSFERAS); ATP binding / L-alanine:2-oxoglutarate aminotransferase	K.ILDQIPGR.A	2	910.536	23.74	4.61269	1	1	0.94	1	924099	832353	1.11	0	15N
AT1G17745.1	PGDH (3-PHOSPHOGLYCERATE DEHYDROGENASE); phosphoglycerate dehydrogenase	R.GGVIDEDALVR.A	2	1142.61	34.5	6.47645	1	1	0.92	2	1830856	2010367	0.91	0	14N
AT1G17745.1	PGDH (3-PHOSPHOGLYCERATE DEHYDROGENASE); phosphoglycerate dehydrogenase	R.GGVIDEDALVR.A	2	1142.61	46.31	3.85086	1	1	0.91	2	2040376	1700544	1.2	0	15N
AT1G17860.1	trypsin and protease inhibitor family protein / Kunitz family protein	K.SLLTGVNYYILPVIR.G	2	1720.02	56.25	13.6046	1	1	0.97	1	9607192	717138	13.4	0	14N
AT1G17860.1	trypsin and protease inhibitor family protein / Kunitz family protein	K.TETCPTSVIQDQFEVSQGLPVK.F	2	2462.22	69.2	4.30508	1	1	0.98	1	2783554	117154	23.76	0	14N
AT1G17860.1	trypsin and protease inhibitor family protein / Kunitz family protein	K.FSPTSIWELANFDETTK.Q	2	1984.96	40.54	4.78602	1	1	0.83	1	4483200	2017956	2.22	0	14N
AT1G17860.1	trypsin and protease inhibitor family protein / Kunitz family protein	R.LALSDVPLK.V	2	954.582	28.33	-0.838062	1	1	0.89	1	2776095	2997998	0.93	0	15N
AT1G17990.1	12-oxophytodienoate reductase, putative	R.VVLAPLTR.S	2	867.565	35.07	3.6885	1	1	0.83	4	3703267	3393933	1.09	0	15N
AT1G18080.1	ATARCA; nucleotide binding	K.SIVEDLKVDLK.A	2	1257.73	53.62	3.7369	1	1	0.81	1	1481602	1606075	0.92	0	14N
AT1G18080.1	ATARCA; nucleotide binding	R.FSPNTLQPTIVSASWDK.T	2	1889.98	41.94	9.36528	1	1	0.89	1	12203785	17372263	0.7	0	14N
AT1G18080.1	ATARCA; nucleotide binding	K.DGVVLLWDLAEGKK.L	3	1541.86	27.18	5.96685	1	1	0.87	1	4228861	5050440	0.84	0	14N
AT1G18080.1	ATARCA; nucleotide binding	R.LWDLAAGVSTR.R	2	1187.64	43.4	4.37844	1	1	0.89	1	4488365	5573348	0.81	0	14N
AT1G18080.1	ATARCA; nucleotide binding	K.YTISEGGEGHRDWVSCVR.F	3	2106.97	33.65	2.61039	1	1	0.92	1	1371546	1720012	0.8	0	14N
AT1G18080.1	ATARCA; nucleotide binding	R.FSPN*TLQPTIVSASWDK.T	2	1890.97	36.24	15.3891	1	1	0.93	1	7597942	16987097	0.45	0	14N
AT1G18080.1	ATARCA; nucleotide binding	K.LYSLEANSVIHALCFSPNR.Y	3	2190.11	43.37	7.94485	1	1	0.95	1	7793764	6956257	1.12	0	15N
AT1G18080.1	ATARCA; nucleotide binding	R.STLAGHTGYVSTVAVSPDGSLCASGGK.D	3	2578.25	30.92	4.34405	1	1	0.87	1	2767601	2483865	1.11	0	15N
AT1G18080.1	ATARCA; nucleotide binding	K.DGVVLLWDLAEGKK.L	3	1541.86	29.95	7.06941	2	2	0.95	1	10682131	8169008	1.31	0	15N
AT1G18080.1	ATARCA; nucleotide binding	R.YWLCAATEHGIK.I	3	1447.71	21.59	5.87138	1	1	0.93	1	5934094	5209185	1.14	0	15N
AT1G18080.1	ATARCA; nucleotide binding	R.FSPNTLQPTIVSASWDK.T	2	1889.97	62.09	4.55036	2	2	0.97	1	20291537	17250439	1.18	0	15N
AT1G18540.1	60S ribosomal protein L6 (RPL6A)	R.VNQAYVIGTSTK.I	2	1279.69	71.9	2.96948	2	2	0.97	3	6286248	8096776	0.78	0	14N
AT1G18540.1	60S ribosomal protein L6 (RPL6A)	K.ASITPGTVLIILAGR.F	2	1480.92	46.34	6.48252	2	2	0.94	3	3382755	2337298	1.45	0	14N
AT1G18540.1	60S ribosomal protein L6 (RPL6A)	K.SIEAVPELK.V	2	984.561	25.4	4.46901	1	1	0.93	1	1594524	2282248	0.7	0	15N
AT1G18540.1	60S ribosomal protein L6 (RPL6A)	R.VNQAYVIGTSTK.I	2	1279.69	66.94	3.51649	2	2	0.99	3	7967287	7776627	1.02	0	15N
AT1G18540.1	60S ribosomal protein L6 (RPL6A)	K.ASITPGTVLIILAGR.F	3	1480.92	38.62	7.15778	3	3	0.95	3	4437755	6684015	0.643333	0.0288675	15N
AT1G18740.1	unknown protein	R.SLLSLRR.D	2	844.53	23.34	-11.5639	1	1	0.91	3	2217095	488990	4.53	0	15N
AT1G18980.1	germin-like protein, putative	K.VLNAGEMFVVPR.G	2	1330.72	47.39	6.1621	1	1	0.86	1	2443717	2782531	0.88	0	15N
AT1G19410.1	FUNCTIONS IN: molecular_function unknown; INVOLVED IN: biological_process unknown; LOCATED IN: cellular_component unknown; CONTAINS InterPro DOMAIN/s: FBD (InterPro:IPR013596), Leucine-rich repeat 2 (InterPro:IPR013101); BEST Arabidopsis thaliana protein match is: F-box family protein (TAIR:AT5G62970.1); Has 533 Blast hits to 521 proteins in 5 species: Archae - 0; Bacteria - 0; Metazoa - 0; Fungi…	K.RGSFFGCGTLPLHR.V	4	1604.82	24.8	2.08591	1	1	0.86	1	3965169	57676	68.75	0	15N
AT1G19430.1	dehydration-responsive protein-related	K.N*EEVTVN*EISKK.R	2	1390.69	24.36	1.94148	1	1	0.99	1	303047	22403	13.53	0	15N
AT1G19570.1	DHAR1 (dehydroascorbate reductase); copper ion binding / glutathione dehydrogenase (ascorbate)	K.TPAEFASVGSNIFGTFGTFLK.S	2	2190.12	88.01	6.11842	2	2	0.9	2	1977621	2585822	0.715	0.0636396	14N
AT1G19570.1	DHAR1 (dehydroascorbate reductase); copper ion binding / glutathione dehydrogenase (ascorbate)	K.SKDSNDGSEHALLVELEALENHLK.S	4	2647.34	49.03	8.27253	2	2	0.92	2	13709009	20270707	0.68	0	14N
AT1G19570.1	DHAR1 (dehydroascorbate reductase); copper ion binding / glutathione dehydrogenase (ascorbate)	K.TLFSLDSFEK.T	2	1185.61	42.42	7.33806	2	2	0.94	3	12054890	18455105	0.65	0	14N
AT1G19570.1	DHAR1 (dehydroascorbate reductase); copper ion binding / glutathione dehydrogenase (ascorbate)	K.YVISGWAPK.V	2	1019.56	37.41	3.82521	1	1	0.84	2	7135200	10584043	0.67	0	14N
AT1G19570.1	DHAR1 (dehydroascorbate reductase); copper ion binding / glutathione dehydrogenase (ascorbate)	K.YPDPPLKTPAEFASVGSNIFGTFGTFLK.S	3	3000.56	23.81	6.89877	1	1	0.95	2	1976561	3358081	0.59	0	14N
AT1G19570.1	DHAR1 (dehydroascorbate reductase); copper ion binding / glutathione dehydrogenase (ascorbate)	K.LYHLQVALGHFK.S	4	1424.81	33.9	4.98315	1	1	0.87	3	17155472	26678716	0.64	0	14N
AT1G19570.1	DHAR1 (dehydroascorbate reductase); copper ion binding / glutathione dehydrogenase (ascorbate)	K.IHLINLSDKPQWFLDISPQGK.V	4	2448.34	39.74	4.41118	4	4	0.8	1	5955079	8864940	0.65	0.023094	14N
AT1G19570.1	DHAR1 (dehydroascorbate reductase); copper ion binding / glutathione dehydrogenase (ascorbate)	R.VSAVDLSLAPK.L	2	1098.64	64.96	5.18825	2	2	0.99	3	11452935	18086300	0.63	0	14N
AT1G19570.1	DHAR1 (dehydroascorbate reductase); copper ion binding / glutathione dehydrogenase (ascorbate)	K.AAVGAPDHLGDCPFSQR.A	3	1796.84	35.65	4.56358	1	1	0.97	2	15944231	10193800	1.56	0	15N
AT1G19570.1	DHAR1 (dehydroascorbate reductase); copper ion binding / glutathione dehydrogenase (ascorbate)	K.DSNDGSEHALLVELEALENHLK.S	3	2432.21	32.14	9.82654	1	1	0.9	2	3023715	2209129	1.37	0	15N
AT1G19570.1	DHAR1 (dehydroascorbate reductase); copper ion binding / glutathione dehydrogenase (ascorbate)	R.ALLTLEEK.S	2	915.541	36.69	6.11664	1	1	0.95	2	6771915	4431950	1.53	0	15N
AT1G19570.1	DHAR1 (dehydroascorbate reductase); copper ion binding / glutathione dehydrogenase (ascorbate)	K.LYHLQVALGHFK.S	3	1424.81	22.72	4.98315	1	1	0.94	3	6038265	3790521	1.59	0	15N
AT1G19570.1	DHAR1 (dehydroascorbate reductase); copper ion binding / glutathione dehydrogenase (ascorbate)	K.IHLINLSDKPQWFLDISPQGK.V	3	2448.34	41.19	6.45339	3	3	0.92	1	27130936	18624413	1.46667	0.0057735	15N
AT1G19570.1	DHAR1 (dehydroascorbate reductase); copper ion binding / glutathione dehydrogenase (ascorbate)	K.TPAEFASVGSNIFGTFGTFLK.S	2	2190.12	96.82	7.76218	5	5	0.94	2	10184456	6399378	1.59	0.01	15N
AT1G19570.1	DHAR1 (dehydroascorbate reductase); copper ion binding / glutathione dehydrogenase (ascorbate)	K.SKDSNDGSEHALLVELEALENHLK.S	4	2647.34	40.44	6.98821	2	2	0.79	2	19987390	12510784	1.6	0	15N
AT1G19570.1	DHAR1 (dehydroascorbate reductase); copper ion binding / glutathione dehydrogenase (ascorbate)	K.TLFSLDSFEK.T	2	1185.61	38.9	7.00068	1	1	0.96	3	20875605	12958785	1.61	0	15N
AT1G19570.1	DHAR1 (dehydroascorbate reductase); copper ion binding / glutathione dehydrogenase (ascorbate)	K.YVISGWAPK.V	2	1019.56	49.24	5.0022	2	2	0.98	2	10562017	6872506	1.54	0	15N
AT1G19570.1	DHAR1 (dehydroascorbate reductase); copper ion binding / glutathione dehydrogenase (ascorbate)	K.YPDPPLKTPAEFASVGSNIFGTFGTFLK.S	3	3000.51	34.19	-7.76528	1	1	0.96	2	3760258	3007452	1.25	0	15N
AT1G19570.1	DHAR1 (dehydroascorbate reductase); copper ion binding / glutathione dehydrogenase (ascorbate)	R.VSAVDLSLAPK.L	2	1098.64	76.24	3.91394	1	1	0.99	3	14568952	10404308	1.4	0	15N
AT1G20010.1	TUB5; structural constituent of cytoskeleton	R.SGPFGQIFRPDNFVFGQSGAGNNWAK.G	3	2797.35	39.8	2.14489	2	2	0.97	3	8966633	8814898	1.02	0	14N
AT1G20010.1	TUB5; structural constituent of cytoskeleton	R.SGPFGQIFRPDN*FVFGQSGAGNNWAK.G	3	2798.36	54.59	10.006	2	2	0.96	3	8184313	7167628	1.14	0	15N
AT1G20010.1	TUB5; structural constituent of cytoskeleton	R.SGPFGQIFRPDNFVFGQSGAGNNWAK.G	3	2797.36	52.6	6.39893	1	1	0.97	3	9691020	7447849	1.3	0	15N
AT1G20440.1	COR47 (COLD-REGULATED 47)	K.EEEVKPQETTTLESEFDHK.A	3	2275.05	20.44	-0.879099	1	1	0.88	1	1633633	3581271	0.46	0	15N
AT1G20450.1	ERD10 (EARLY RESPONSIVE TO DEHYDRATION 10); actin binding	K.KPEDSQVVNTTPLVETATPIADIPEEK.K	3	2920.51	34.84	2.87622	1	1	0.97	2	2737633	2180974	1.26	0	14N
AT1G20450.1	ERD10 (EARLY RESPONSIVE TO DEHYDRATION 10); actin binding	K.TVEEENQGVMDR.I	2	1405.63	37.17	3.91286	1	1	0.87	2	664727	298054	2.23	0	14N
AT1G20450.1	ERD10 (EARLY RESPONSIVE TO DEHYDRATION 10); actin binding	K.VATEESSAPEIK.E	2	1259.64	49.36	2.93737	1	1	0.91	2	311165	221171	1.41	0	14N
AT1G20450.1	ERD10 (EARLY RESPONSIVE TO DEHYDRATION 10); actin binding	K.TVEEENQGVMDR.I	2	1405.63	51.88	5.33572	2	2	0.95	2	499050	545609	0.91	0	15N
AT1G20450.1	ERD10 (EARLY RESPONSIVE TO DEHYDRATION 10); actin binding	K.VATEESSAPEIK.E	2	1259.64	33.67	5.23962	1	1	0.9	2	276148	403436	0.68	0	15N
AT1G20620.1	CAT3 (CATALASE 3); catalase	R.LNVRPSI.-	2	797.488	28.27	5.76814	1	1	0.92	4	2721415	3172056	0.86	0	15N
AT1G20620.2	CAT3 (CATALASE 3); catalase	K.GFFEVTHDISNLTCADFLR.A	3	2241.08	27.31	8.74586	1	1	0.87	5	4617183	5042730	0.92	0	14N
AT1G20620.2	CAT3 (CATALASE 3); catalase	K.LFIQTMDPADEDKFDFDPLDVTK.I	3	2699.3	30.65	8.78013	1	1	0.88	4	4533635	5496046	0.82	0	14N
AT1G20620.2	CAT3 (CATALASE 3); catalase	R.GPVLLEDYHLIEK.V	3	1524.84	23.18	6.42696	1	1	0.85	3	2556431	3335315	0.77	0	14N
AT1G20620.2	CAT3 (CATALASE 3); catalase	K.LFIQTMDPADEDKFDFDPLDVTK.I	3	2699.29	31.06	6.26094	1	1	0.96	4	4144504	6747880	0.61	0	15N
AT1G20620.2	CAT3 (CATALASE 3); catalase	R.GPVLLEDYHLIEK.V	3	1524.84	21.75	5.63999	1	1	0.93	3	2895659	4054526	0.71	0	15N
AT1G20620.2	CAT3 (CATALASE 3); catalase	K.GFFEVTHDISNLTCADFLR.A	3	2241.08	29.42	9.32594	1	1	0.86	5	5781153	5971262	0.97	0	15N
AT1G20840.1	TMT1 (TONOPLAST MONOSACCHARIDE TRANSPORTER1); carbohydrate transmembrane transporter/ nucleoside transmembrane transporter/ sugar:hydrogen symporter	K.TMEDLLVTLEDHEGDDTLETVDEDGQ*MR.L	3	3206.42	35.89	10.1984	1	1	0.91	1	1542411	997054	1.55	0	15N
AT1G21100.1	O-methyltransferase, putative	K.DNIQDIGSLASQVIVN*FDSVFLNTWAQLK.D	3	3236.66	46.61	3.29004	1	1	0.77	3	336141	623867	0.54	0	15N
AT1G21720.1	PBC1 (PROTEASOME BETA SUBUNIT C1); peptidase/ threonine-type endopeptidase	R.FGPYLCQPVIAGLGDDDKPFICTMDSIGAK.E	3	3284.57	29.25	2.43564	1	1	0.76	1	2677110	3591528	0.75	0	14N
AT1G21720.1	PBC1 (PROTEASOME BETA SUBUNIT C1); peptidase/ threonine-type endopeptidase	R.VFIGLSGLATDVQTLYQR.L	3	1980.09	32.36	6.4139	1	1	0.84	1	1498856	1885209	0.8	0	15N
AT1G21750.1	ATPDIL1-1 (PDI-LIKE 1-1); protein disulfide isomerase	K.VVVVGIFPK.L	2	956.619	32.39	5.12223	2	2	0.96	2	4988230	7173494	0.7	0	14N
AT1G21750.1	ATPDIL1-1 (PDI-LIKE 1-1); protein disulfide isomerase	K.SQPIPAENNEPVKVVVSDSLDDIVLNSGK.N	3	3062.6	33.7	3.65704	2	2	0.93	2	5823953	7863707	0.74	0	14N
AT1G21750.1	ATPDIL1-1 (PDI-LIKE 1-1); protein disulfide isomerase	K.AASALSSNVPPVVLAK.I	2	1522.89	28.22	5.05621	1	1	0.74	2	3370076	4393038	0.77	0	14N
AT1G21750.1	ATPDIL1-1 (PDI-LIKE 1-1); protein disulfide isomerase	K.LSGSEFDSFMAIAEK.L	2	1630.77	53.23	4.16983	1	1	0.77	2	3746793	4514969	0.83	0	14N
AT1G21750.1	ATPDIL1-1 (PDI-LIKE 1-1); protein disulfide isomerase	K.GQGLSFLLGDAENSQGAFQYFGLEESQVPLIIIQTADDKK.Y	4	4326.2	22.97	4.29941	1	1	0.6	2	4128411	5112615	0.81	0	14N
AT1G21750.1	ATPDIL1-1 (PDI-LIKE 1-1); protein disulfide isomerase	K.VVVSDSLDDIVLNSGK.N	2	1658.89	70.43	4.82253	1	1	0.86	2	1197364	2091997	0.57	0	14N
AT1G21750.1	ATPDIL1-1 (PDI-LIKE 1-1); protein disulfide isomerase	K.LRSELDFAHTSDAK.L	4	1588.8	23.46	4.72057	1	1	0.96	2	1797688	2373850	0.76	0	14N
AT1G21750.1	ATPDIL1-1 (PDI-LIKE 1-1); protein disulfide isomerase	K.GQGLSFLLGDAENSQGAFQYFGLEESQ*VPLIIIQTADDKK.Y	4	4327.18	37.06	4.94551	1	1	0.65	2	3755705	5082960	0.74	0	14N
AT1G21750.1	ATPDIL1-1 (PDI-LIKE 1-1); protein disulfide isomerase	R.LFKPFDEQFVDSKDFDGEALEK.F	4	2603.25	21.75	1.19082	1	1	0.89	2	7744564	10212085	0.76	0	14N
AT1G21750.1	ATPDIL1-1 (PDI-LIKE 1-1); protein disulfide isomerase	K.TNVEVDQIESWVK.D	2	1545.79	53.55	6.72802	1	1	0.84	2	3779662	4726669	0.8	0	14N
AT1G21750.1	ATPDIL1-1 (PDI-LIKE 1-1); protein disulfide isomerase	K.VVVVGIFPK.L	2	956.618	46.28	4.49502	2	2	0.96	2	6676218	4977105	1.34	0	15N
AT1G21750.1	ATPDIL1-1 (PDI-LIKE 1-1); protein disulfide isomerase	K.SQPIPAENNEPVKVVVSDSLDDIVLNSGK.N	3	3062.6	50.34	5.3223	1	1	0.87	2	5174831	5075540	1.02	0	15N
AT1G21750.1	ATPDIL1-1 (PDI-LIKE 1-1); protein disulfide isomerase	K.VVVSDSLDDIVLNSGK.N	2	1658.89	84.44	3.79774	1	1	0.92	2	3786016	4658116	0.81	0	15N
AT1G21750.1	ATPDIL1-1 (PDI-LIKE 1-1); protein disulfide isomerase	K.GQGLSFLLGDAENSQGAFQYFGLEESQ*VPLIIIQTADDKK.Y	4	4328.18	58.72	3.22276	1	1	0.84	2	3870605	4121452	0.94	0	15N
AT1G21750.1	ATPDIL1-1 (PDI-LIKE 1-1); protein disulfide isomerase	K.TNVEVDQIESWVK.D	2	1545.78	76.21	3.04055	1	1	0.83	2	5493647	4633684	1.19	0	15N
AT1G21750.1	ATPDIL1-1 (PDI-LIKE 1-1); protein disulfide isomerase	K.GQGLSFLLGDAENSQGAFQYFGLEESQVPLIIIQ*TADDKK.Y	4	4327.2	37.98	10.0297	1	1	0.84	2	3870605	4121452	0.94	0	15N
AT1G21750.1	ATPDIL1-1 (PDI-LIKE 1-1); protein disulfide isomerase	K.AASALSSNVPPVVLAK.I	2	1522.89	49.93	4.07123	1	1	0.78	2	4140501	3777680	1.1	0	15N
AT1G21750.1	ATPDIL1-1 (PDI-LIKE 1-1); protein disulfide isomerase	K.LSGSEFDSFMAIAEK.L	2	1630.77	63.94	1.41038	2	2	0.97	2	4112477	3771860	1.09	0	15N
AT1G21750.1	ATPDIL1-1 (PDI-LIKE 1-1); protein disulfide isomerase	R.LFKPFDEQFVDSKDFDGEALEK.F	4	2603.26	27.26	3.64928	1	1	0.94	2	6365933	5881285	1.08	0	15N
AT1G21750.1	ATPDIL1-1 (PDI-LIKE 1-1); protein disulfide isomerase	K.IDASEETNREFATQYEVQGFPTIK.I	3	2772.34	33.22	2.52495	1	1	0.91	2	2743856	2719743	1.01	0	15N
AT1G22275.1	ZYP1b	R.EYEVETN*N*GRIPK.R	2	1550.72	25.15	-9.13357	1	1	0.91	1	2969013	3465210	0.86	0	14N
AT1G22300.1	GRF10 (GENERAL REGULATORY FACTOR 10); ATP binding / protein binding / protein phosphorylated amino acid binding	K.HLIPSSNAVESTVFFYK.M	3	1938	34.94	3.14758	1	1	0.84	3	9473409	11901994	0.8	0	14N
AT1G22300.1	GRF10 (GENERAL REGULATORY FACTOR 10); ATP binding / protein binding / protein phosphorylated amino acid binding	R.YLAEFSSGAER.K	2	1228.58	24.09	2.52324	1	1	0.97	3	2345857	2146012	1.09	0	14N
AT1G22300.1	GRF10 (GENERAL REGULATORY FACTOR 10); ATP binding / protein binding / protein phosphorylated amino acid binding	K.VCNDILSVIDK.H	2	1274.66	37.69	1.8044	1	1	0.85	3	1906841	2628652	0.73	0	14N
AT1G22300.1	GRF10 (GENERAL REGULATORY FACTOR 10); ATP binding / protein binding / protein phosphorylated amino acid binding	K.AAVAAAEN*GLAPTHPVR.L	3	1644.87	42.14	2.79658	1	1	0.95	3	1416866	1721376	0.82	0	14N
AT1G22300.1	GRF10 (GENERAL REGULATORY FACTOR 10); ATP binding / protein binding / protein phosphorylated amino acid binding	K.AAVAAAENGLAPTHPVR.L	3	1643.89	59.23	2.79825	2	2	0.97	3	5017822	9200253	0.69	0.19799	14N
AT1G22300.1	GRF10 (GENERAL REGULATORY FACTOR 10); ATP binding / protein binding / protein phosphorylated amino acid binding	K.QAFDDAIAELDSLNEESYKDSTLIMQLLR.D	3	3327.64	67.51	4.59787	7	7	0.8	3	16074605	20264295	0.79	1.21667e-08	14N
AT1G22300.1	GRF10 (GENERAL REGULATORY FACTOR 10); ATP binding / protein binding / protein phosphorylated amino acid binding	R.DNLTLWTSDLNEEGDER.T	2	2005.9	77.3	5.18472	1	1	0.9	2	2839598	2902074	0.98	0	14N
AT1G22300.1	GRF10 (GENERAL REGULATORY FACTOR 10); ATP binding / protein binding / protein phosphorylated amino acid binding	K.HLIPSSNAVESTVFFYK.M	2	1938	50.48	2.73478	2	2	0.96	3	2196344	2123437	1.22	0.268701	15N
AT1G22300.1	GRF10 (GENERAL REGULATORY FACTOR 10); ATP binding / protein binding / protein phosphorylated amino acid binding	K.EAADQSLEAYK.A	2	1223.58	39.36	3.10565	2	2	0.95	3	3598345	2777268	1.3	0	15N
AT1G22300.1	GRF10 (GENERAL REGULATORY FACTOR 10); ATP binding / protein binding / protein phosphorylated amino acid binding	K.QAFDDAIAELDSLNEESYKDSTLIMQ*LLR.D	3	3328.65	31.9	11.326	1	1	0.76	3	14668962	13648098	1.07	0	15N
AT1G22300.1	GRF10 (GENERAL REGULATORY FACTOR 10); ATP binding / protein binding / protein phosphorylated amino acid binding	K.QAFDDAIAELDSLNEESYKDSTLIMQLLR.D	3	3327.65	67.63	6.2507	5	5	0.8	3	16200754	13497310	1.2	0	15N
AT1G22300.1	GRF10 (GENERAL REGULATORY FACTOR 10); ATP binding / protein binding / protein phosphorylated amino acid binding	K.LSEQTERYDEMVEAMK.K	3	1957.89	25.88	2.707	1	1	0.84	3	1452592	1165166	1.25	0	15N
AT1G22300.1	GRF10 (GENERAL REGULATORY FACTOR 10); ATP binding / protein binding / protein phosphorylated amino acid binding	K.VCNDILSVIDK.H	2	1274.67	37.67	4.31487	1	1	0.93	3	3622580	3378555	1.07	0	15N
AT1G22300.1	GRF10 (GENERAL REGULATORY FACTOR 10); ATP binding / protein binding / protein phosphorylated amino acid binding	K.DSTLIMQLLR.D	2	1188.67	62.24	7.82393	2	2	0.89	21	16445580	12940521	1.27	0	15N
AT1G22300.1	GRF10 (GENERAL REGULATORY FACTOR 10); ATP binding / protein binding / protein phosphorylated amino acid binding	K.AAVAAAEN*GLAPTHPVR.L	3	1644.88	36.37	6.68747	1	1	0.98	3	2283456	1721015	1.33	0	15N
AT1G22300.1	GRF10 (GENERAL REGULATORY FACTOR 10); ATP binding / protein binding / protein phosphorylated amino acid binding	K.AAVAAAENGLAPTHPVR.L	3	1643.89	55.73	4.37988	1	1	0.92	3	6725525	10184756	0.66	0	15N
AT1G22300.1	GRF10 (GENERAL REGULATORY FACTOR 10); ATP binding / protein binding / protein phosphorylated amino acid binding	R.DNLTLWTSDLNEEGDER.T	2	2005.9	101.58	3.39001	1	1	0.94	2	4914002	3886118	1.26	0	15N
AT1G22530.1	PATL2 (PATELLIN 2); transporter	K.ELFINVPWWYIPYYK.T	2	2030.05	26.56	5.41861	1	1	0.88	2	3120228	4624370	0.67	0	14N
AT1G22530.1	PATL2 (PATELLIN 2); transporter	K.TFGSIITSPR.T	2	1077.59	30.77	3.34079	1	1	0.91	2	2388623	2689048	0.89	0	14N
AT1G22530.1	PATL2 (PATELLIN 2); transporter	R.ALWQFIK.R	2	904.53	30.95	5.52776	1	1	0.87	1	1455595	1157761	1.26	0	15N
AT1G22530.1	PATL2 (PATELLIN 2); transporter	K.DSPFTVEDGVTEAVVK.S	2	1691.84	70.6	3.60556	1	1	0.89	1	2091306	1957075	1.07	0	15N
AT1G22530.1	PATL2 (PATELLIN 2); transporter	K.ELFINVPWWYIPYYK.T	2	2030.05	23.99	2.41374	1	1	0.95	2	3283801	3193706	1.03	0	15N
AT1G22530.1	PATL2 (PATELLIN 2); transporter	K.SSFVFVSDFR.N	2	1189.59	50.25	5.63222	1	1	0.81	2	2469648	1929940	1.28	0	15N
AT1G22530.1	PATL2 (PATELLIN 2); transporter	K.QFEDNYPEFVAK.E	2	1485.69	37.49	5.18279	1	1	0.95	1	1381630	970770	1.42	0	15N
AT1G22530.1	PATL2 (PATELLIN 2); transporter	K.TFGSIITSPR.T	2	1077.59	34.06	3.34079	1	1	0.9	2	2771805	1793144	1.55	0	15N
AT1G22780.1	PFL (POINTED FIRST LEAVES); RNA binding / nucleic acid binding / structural constituent of ribosome	R.AGELSAAEIDNLMTIVANPR.Q	2	2084.07	39	3.55075	2	2	0.91	1	2858770	5481034	0.635	0.162635	14N
AT1G22780.1	PFL (POINTED FIRST LEAVES); RNA binding / nucleic acid binding / structural constituent of ribosome	K.IPDWFLNR.Q	2	1059.57	33.26	7.26718	1	1	0.83	1	6531363	7863950	0.83	0	14N
AT1G22780.1	PFL (POINTED FIRST LEAVES); RNA binding / nucleic acid binding / structural constituent of ribosome	K.IMFALTSIK.G	2	1022.59	32.73	1.56465	1	1	0.92	1	6842184	5388361	1.27	0	15N
AT1G22780.1	PFL (POINTED FIRST LEAVES); RNA binding / nucleic acid binding / structural constituent of ribosome	R.AGELSAAEIDNLMTIVANPR.Q	3	2084.08	31.63	5.80596	2	2	0.85	1	6227027	5462886	1.14	0	15N
AT1G22780.1	PFL (POINTED FIRST LEAVES); RNA binding / nucleic acid binding / structural constituent of ribosome	K.YSQVVSNALDMK.L	2	1354.67	51.55	1.65875	2	2	0.96	1	4916496	3776199	1.3	0	15N
AT1G22780.1	PFL (POINTED FIRST LEAVES); RNA binding / nucleic acid binding / structural constituent of ribosome	K.IPDWFLNR.Q	2	1059.56	47.73	6.22901	1	1	0.91	1	10270870	8210226	1.25	0	15N
AT1G22840.1	CYTC-1 (CYTOCHROME C-1); electron carrier/ heme binding / iron ion binding	R.ADLIAYLK.E	2	905.535	40.37	5.52163	2	2	0.93	2	6007388	6540892	0.92	0	14N
AT1G22840.1	CYTC-1 (CYTOCHROME C-1); electron carrier/ heme binding / iron ion binding	R.ADLIAYLK.E	2	905.534	24.34	4.85903	1	1	0.97	2	6171515	5982681	1.03	0	15N
AT1G23190.1	phosphoglucomutase, cytoplasmic, putative / glucose phosphomutase, putative	K.VSTVSTSPIDGQKPGTSGLR.K	3	1986.05	22.36	4.43091	1	1	0.97	1	1058981	1447151	0.73	0	14N
AT1G23190.1	phosphoglucomutase, cytoplasmic, putative / glucose phosphomutase, putative	R.ESQEALSPLVDLALK.L	2	1611.89	44.98	6.51413	1	1	0.94	1	1971274	1695660	1.16	0	15N
AT1G23190.1	phosphoglucomutase, cytoplasmic, putative / glucose phosphomutase, putative	R.SMPTSAALDVVAK.S	2	1288.68	29.34	2.17277	1	1	0.92	4	1681921	1211610	1.39	0	15N
AT1G23190.1	phosphoglucomutase, cytoplasmic, putative / glucose phosphomutase, putative	K.ATGAFILTASHNPGGPTEDFGIK.Y	3	2300.18	27.52	11.1732	1	1	0.9	4	3381282	5184021	0.65	0	15N
AT1G23190.1	phosphoglucomutase, cytoplasmic, putative / glucose phosphomutase, putative	R.FFVTPSDSVAIIAANAIGAIPYFSSGLK.G	3	2855.53	46.65	3.81717	4	4	0.96	1	6501339	5638279	1.145	0.01	15N
AT1G23190.1	phosphoglucomutase, cytoplasmic, putative / glucose phosphomutase, putative	K.QPNYLENFVQATFNALTAEK.V	3	2297.16	34.58	7.48757	1	1	0.94	1	1734956	1253630	1.38	0	15N
AT1G23190.1	phosphoglucomutase, cytoplasmic, putative / glucose phosphomutase, putative	K.NTLLSTPAVSAVIR.E	2	1440.84	36.31	2.56795	1	1	0.94	1	1417188	1145885	1.24	0	15N
AT1G23190.1	phosphoglucomutase, cytoplasmic, putative / glucose phosphomutase, putative	K.LVSVEDIVR.Q	2	1028.6	23.69	7.2915	1	1	0.88	1	2223955	1792145	1.24	0	15N
AT1G23190.1	phosphoglucomutase, cytoplasmic, putative / glucose phosphomutase, putative	R.YDYENVDAGK.A	2	1172.51	48.39	4.94667	1	1	0.94	1	565091	337876	1.67	0	15N
AT1G23190.1	phosphoglucomutase, cytoplasmic, putative / glucose phosphomutase, putative	K.VSTVSTSPIDGQKPGTSGLR.K	3	1986.05	23.6	4.33021	1	1	0.96	1	1848919	1195779	1.55	0	15N
AT1G23410.1	ubiquitin extension protein, putative / 40S ribosomal protein S27A (RPS27aA)	R.TLADYNIQK.E	2	1064.56	37.82	3.38169	1	1	0.97	16	7935543	9697103	0.82	0	14N
AT1G23410.1	ubiquitin extension protein, putative / 40S ribosomal protein S27A (RPS27aA)	K.LAVLQFYK.V	2	980.581	29.98	4.07923	1	1	0.89	3	7713010	9682240	0.8	0	14N
AT1G23410.1	ubiquitin extension protein, putative / 40S ribosomal protein S27A (RPS27aA)	K.LAVLQFYK.V	2	980.581	29.3	3.87527	1	1	0.96	3	9048070	7459050	1.21	0	15N
AT1G23410.1	ubiquitin extension protein, putative / 40S ribosomal protein S27A (RPS27aA)	R.TLADYNIQK.E	2	1064.56	39.35	4.41498	1	1	0.98	16	8715436	8001335	1.09	0	15N
AT1G24180.1	IAR4; oxidoreductase, acting on the aldehyde or oxo group of donors, disulfide as acceptor / pyruvate dehydrogenase (acetyl-transferring)	K.DASFYGGHGIVGAQIPLGCGLAFAQK.Y	3	2633.33	27.94	7.63297	1	1	0.85	1	3129866	4651368	0.67	0	14N
AT1G24180.1	IAR4; oxidoreductase, acting on the aldehyde or oxo group of donors, disulfide as acceptor / pyruvate dehydrogenase (acetyl-transferring)	K.NGPIILEMDTYR.Y	2	1420.72	38.77	7.32028	1	1	0.9	1	2287257	2447659	0.93	0	14N
AT1G24180.1	IAR4; oxidoreductase, acting on the aldehyde or oxo group of donors, disulfide as acceptor / pyruvate dehydrogenase (acetyl-transferring)	K.DASFYGGHGIVGAQIPLGCGLAFAQK.Y	3	2633.32	31.47	3.9494	1	1	0.85	1	4164167	4128434	1.01	0	15N
AT1G24180.1	IAR4; oxidoreductase, acting on the aldehyde or oxo group of donors, disulfide as acceptor / pyruvate dehydrogenase (acetyl-transferring)	K.NGPIILEMDTYR.Y	2	1420.72	47.68	4.36402	1	1	0.92	1	2502110	1998666	1.25	0	15N
AT1G24360.1	3-oxoacyl-(acyl-carrier protein) reductase, chloroplast / 3-ketoacyl-acyl carrier protein reductase	R.IINISSVVGLIGNIGQANYAAAK.G	3	2285.31	32.47	10.327	2	2	0.86	1	3184325	4882073	0.65	0	14N
AT1G24360.1	3-oxoacyl-(acyl-carrier protein) reductase, chloroplast / 3-ketoacyl-acyl carrier protein reductase	K.VESPVVVITGASR.G	2	1312.75	66.67	5.7894	1	1	0.9	1	1604965	2007869	0.8	0	15N
AT1G24360.1	3-oxoacyl-(acyl-carrier protein) reductase, chloroplast / 3-ketoacyl-acyl carrier protein reductase	R.IINISSVVGLIGNIGQANYAAAK.G	2	2285.29	74.33	2.97556	3	3	0.95	1	1262360	1388486	0.95	0.034641	15N
AT1G24360.1	3-oxoacyl-(acyl-carrier protein) reductase, chloroplast / 3-ketoacyl-acyl carrier protein reductase	K.AQATATEQSPGEVVQK.V	2	1642.83	44.22	3.9566	1	1	0.98	1	101860	110423	0.92	0	15N
AT1G24510.1	T-complex protein 1 epsilon subunit, putative / TCP-1-epsilon, putative / chaperonin, putative	K.Q*Q*Q*ILLATQVVK.M	3	1370.78	21.05	1.82379	1	1	0.92	2	7117929	2390439	2.98	0	14N
AT1G24510.1	T-complex protein 1 epsilon subunit, putative / TCP-1-epsilon, putative / chaperonin, putative	K.Q*Q*Q*ILLATQVVK.M	3	1370.77	22.81	-4.08528	1	1	0.85	2	6702572	1059803	6.32	0	15N
AT1G24510.1	T-complex protein 1 epsilon subunit, putative / TCP-1-epsilon, putative / chaperonin, putative	R.IAEGYEMASR.V	2	1125.53	68.38	11.5502	1	1	0.96	2	22149387	562349	39.39	0	15N
AT1G25350.1	OVA9 (ovule abortion 9); glutamine-tRNA ligase	K.ITYTSDYFQELYDLAVELIR.R	3	2451.25	28.62	7.8736	1	1	0.62	1	777059	544433	1.43	0	15N
AT1G25490.1	RCN1 (ROOTS CURL IN NPA); protein phosphatase type 2A regulator	K.FATTVESTFLIAEIMTMFDDLTKDDQ*DSVR.L	3	3439.62	21.3	1.54087	1	1	0.59	1	1275347	1236276	1.03	0	14N
AT1G25490.1	RCN1 (ROOTS CURL IN NPA); protein phosphatase type 2A regulator	K.FATTVESTFLIAEIMTMFDDLTKDDQ*DSVR.L	3	3439.62	32.69	2.5875	1	1	0.85	1	751309	729211	1.03	0	15N
AT1G26550.1	peptidyl-prolyl cis-trans isomerase PPIC-type family protein	K.IAAEYSECPSGK.K	2	1310.59	29.37	3.12836	1	1	0.99	1	86554	103950	0.83	0	14N
AT1G26550.1	peptidyl-prolyl cis-trans isomerase PPIC-type family protein	K.IAAEYSECPSGK.K	2	1310.59	46.76	2.13644	1	1	0.95	1	128431	116626	1.1	0	15N
AT1G26570.1	UGD1 (UDP-GLUCOSE DEHYDROGENASE 1); NAD or NADH binding / UDP-glucose 6-dehydrogenase/ binding / catalytic/ coenzyme binding / oxidoreductase/ oxidoreductase, acting on the CH-OH group of donors, NAD or NADP as acceptor	K.AADLTYWESAAR.M	2	1352.65	59.22	6.94935	1	1	0.84	4	2247018	2294220	0.98	0	15N
AT1G26570.1	UGD1 (UDP-GLUCOSE DEHYDROGENASE 1); NAD or NADH binding / UDP-glucose 6-dehydrogenase/ binding / catalytic/ coenzyme binding / oxidoreductase/ oxidoreductase, acting on the CH-OH group of donors, NAD or NADP as acceptor	K.LAANAFLAQR.I	2	1073.61	75.45	6.14751	1	1	0.78	4	3077358	4368936	0.7	0	15N
AT1G26630.1	FBR12 (FUMONISIN B1-RESISTANT12); translation initiation factor	R.LGFDEGKDIVVSVMSSMGEEQICAVK.E	3	2827.37	39.43	5.48216	2	2	0.84	1	36080447	49594606	0.73	0	14N
AT1G26630.1	FBR12 (FUMONISIN B1-RESISTANT12); translation initiation factor	K.CHFVAIDIFTAK.K	2	1420.73	33.05	5.70131	1	1	0.89	2	2788315	4122151	0.68	0	14N
AT1G26630.1	FBR12 (FUMONISIN B1-RESISTANT12); translation initiation factor	R.LGFDEGKDIVVSVMSSMGEEQICAVK.E	3	2827.37	30.7	7.17986	2	2	0.83	1	48234357	43936258	1.1	0	15N
AT1G26630.1	FBR12 (FUMONISIN B1-RESISTANT12); translation initiation factor	K.CHFVAIDIFTAK.K	2	1420.73	45.47	5.70131	1	1	0.53	2	7536295	4368606	1.73	0	15N
AT1G26630.1	FBR12 (FUMONISIN B1-RESISTANT12); translation initiation factor	K.KLEDIVPSSHNCDVPHVNR.V	4	2215.09	24.82	1.26406	3	3	0.99	4	27190008	22178765	1.23	0	15N
AT1G26880.1	60S ribosomal protein L34 (RPL34A)	R.AYGGVLSGSAVR.E	2	1135.61	51.95	3.34623	1	1	0.95	3	4398994	6283189	0.7	0	14N
AT1G26880.1	60S ribosomal protein L34 (RPL34A)	R.AYGGVLSGSAVR.E	2	1135.61	62.96	2.46564	1	1	0.98	3	8136282	7060609	1.15	0	15N
AT1G26910.1	60S ribosomal protein L10 (RPL10B)	K.ENVSSEALEAAR.I	2	1274.62	74.11	1.80446	1	1	0.89	4	1264507	2173043	0.58	0	14N
AT1G26910.1	60S ribosomal protein L10 (RPL10B)	R.VAIGQVLLSVR.C	2	1153.74	72.58	8.66757	2	2	0.94	3	4228120	6476723	0.65	0	14N
AT1G26910.1	60S ribosomal protein L10 (RPL10B)	K.FLSCHGPLANR.Q	3	1270.64	20.37	5.90257	1	1	0.95	3	3048912	2128527	1.43	0	15N
AT1G26910.1	60S ribosomal protein L10 (RPL10B)	R.VHPFHVLR.I	3	1003.58	21.84	5.2811	1	1	0.96	3	5716704	3874068	1.48	0	15N
AT1G26910.1	60S ribosomal protein L10 (RPL10B)	R.VAIGQVLLSVR.C	2	1153.73	77.34	6.0673	2	2	0.99	3	9245700	8843902	1.05	0	15N
AT1G26910.1	60S ribosomal protein L10 (RPL10B)	K.ENVSSEALEAAR.I	2	1274.62	80.48	2.27519	1	1	0.91	4	3818974	3423930	1.12	0	15N
AT1G27030.1	unknown protein	R.LVIAEVLVDELSPESQGIIR.K	3	2179.24	21.99	8.53517	1	1	0.9	1	1369584	2165178	0.63	0	15N
AT1G27450.1	APT1 (ADENINE PHOSPHORIBOSYL TRANSFERASE 1); adenine phosphoribosyltransferase	K.LGETSLFVLVK.S	2	1204.72	65.88	5.7275	1	1	0.97	2	1854114	2238515	0.83	0	14N
AT1G27970.1	NTF2B (NUCLEAR TRANSPORT FACTOR 2B); Ran GTPase binding / protein transporter	K.FSQMFHLMPTPQGSFYVFNDIFR.L	3	2808.32	26	-1.63799	1	1	0.78	1	3664473	3801189	0.96	0	15N
AT1G28130.1	GH3.17; indole-3-acetic acid amido synthetase	K.LLEDLTTNAEAIQQQVLHQ*ILSQNSGTQYLR.A	3	3524.84	63.79	6.15634	1	1	0.56	1	1212339	1346125	0.9	0	15N
AT1G28290.1	AGP31 (arabinogalactan-protein 31)	K.LVYGLFNVGPFAFNPSCPK.-	2	2126.08	46.77	1.31698	5	5	0.9	2	28448756	34893128	0.82	0	14N
AT1G28290.1	AGP31 (arabinogalactan-protein 31)	K.LFGGDVGAELKPEKK.L	4	1586.88	32.23	4.22214	1	1	0.98	2	6497072	9027397	0.72	0	14N
AT1G28290.1	AGP31 (arabinogalactan-protein 31)	K.LVYGLFNVGPFAFNPSCPK.-	2	2126.09	51.59	5.78531	5	5	0.95	2	41737310	22333962	1.912	0.0939149	15N
AT1G28290.1	AGP31 (arabinogalactan-protein 31)	K.N*GYFLLLAPK.T	2	1135.64	45.81	4.31476	1	1	0.91	2	3062746	1955384	1.57	0	15N
AT1G28290.1	AGP31 (arabinogalactan-protein 31)	K.TVTNFGFR.G	2	940.49	44.84	5.42274	1	1	0.93	2	13915525	8194225	1.7	0	15N
AT1G28290.1	AGP31 (arabinogalactan-protein 31)	K.NGYFLLLAPK.T	2	1134.66	44.6	5.9049	1	1	0.97	2	2881868	2048887	1.41	0	15N
AT1G28290.1	AGP31 (arabinogalactan-protein 31)	K.YAAFNTLLGAKPIEGATVK.L	2	1963.09	52.11	2.03761	2	2	0.98	2	2000927	1307197	1.455	0.106066	15N
AT1G28290.1	AGP31 (arabinogalactan-protein 31)	K.LFGGDVGAELKPEKK.L	4	1586.89	32.53	7.12092	1	1	0.96	2	7944721	4684326	1.7	0	15N
AT1G29250.1	nucleic acid binding	R.YMQQ*YTDVELSALGMAIATVVTVAEILK.N	3	3057.62	40.83	16.1239	4	4	0.39	1	1349335	1901498	0.71	0	14N
AT1G29250.1	nucleic acid binding	R.YMQQYTDVELSALGMAIATVVTVAEILK.N	3	3057.61	31.92	6.9834	4	4	0.68	1	2021743	2080713	0.975	0.01	15N
AT1G29310.1	P-P-bond-hydrolysis-driven protein transmembrane transporter	K.AFSPTTINTGR.G	2	1163.61	25.41	6.53145	1	1	0.23	2	1574481	3693852	0.43	0	15N
AT1G29310.1	P-P-bond-hydrolysis-driven protein transmembrane transporter	R.GTVMELGITPIVTSGLVMQLLAGSK.I	3	2514.41	20.86	8.27239	1	1	0.86	2	938405	1206892	0.78	0	15N
AT1G29750.1	RKF1 (RECEPTOR-LIKE KINASE IN FLOWERS 1); ATP binding / kinase/ protein serine/threonine kinase/ receptor signaling protein serine/threonine kinase	K.FLPCIKDFK.C	3	1166.61	23.44	-10.3718	1	1	0.91	2	132726816	182552525	0.73	0	14N
AT1G29965.1	60S ribosomal protein L18A (RPL18aA)	R.DTTLNGAVEQMYTEMASR.H	2	2015.91	115.6	2.48028	1	1	0.92	3	1982032	2109979	0.94	0	14N
AT1G29965.1	60S ribosomal protein L18A (RPL18aA)	R.DTTLNGAVEQMYTEMASR.H	2	2015.91	80.73	4.4149	1	1	0.97	3	2857349	2549212	1.12	0	15N
AT1G29965.1	60S ribosomal protein L18A (RPL18aA)	R.FPCIQIIK.T	2	1017.58	27.73	1.86718	1	1	0.94	4	1544769	1370656	1.13	0	15N
AT1G29965.1	60S ribosomal protein L18A (RPL18aA)	K.IKFPLVFR.K	3	1018.65	25.27	6.18471	1	1	0.95	4	11223161	8684099	1.29	0	15N
AT1G29965.1	60S ribosomal protein L18A (RPL18aA)	R.DTTLN*GAVEQMYTEMASR.H	2	2017.89	53.29	2.60074	1	1	0.93	3	3875759	2410495	1.61	0	15N
AT1G30230.1	elongation factor 1-beta / EF-1-beta	K.KLDEHLLTR.S	3	1123.65	25.92	4.44981	1	1	0.91	3	3865072	5477767	0.71	0	14N
AT1G30230.1	elongation factor 1-beta / EF-1-beta	K.LDEHLLTR.S	3	995.553	22.98	5.3237	1	1	0.96	3	1189105	963741	1.23	0	15N
AT1G30230.1	elongation factor 1-beta / EF-1-beta	R.SYITGYQASK.D	2	1116.56	25.38	6.53798	1	1	0.9	3	367501	301894	1.22	0	15N
AT1G30230.1	elongation factor 1-beta / EF-1-beta	K.SSVLIDIKPWDDETDMK.K	3	1990.97	27.76	4.36974	1	1	0.85	2	8439447	6158435	1.37	0	15N
AT1G30230.1	elongation factor 1-beta / EF-1-beta	K.KLDEHLLTR.S	3	1123.65	24.72	5.07279	2	2	0.96	3	6136350	4882158	1.26	0	15N
AT1G30230.1	elongation factor 1-beta / EF-1-beta	K.SIQMEGLFWGASK.L	2	1452.72	63.8	2.20277	1	1	0.83	3	5299811	3012455	1.76	0	15N
AT1G30360.1	ERD4 (early-responsive to dehydration 4)	R.AEAILAATNNRPTNK.T	3	1582.86	23.51	4.10652	1	1	0.92	1	388630	507630	0.77	0	15N
AT1G30370.1	lipase class 3 family protein	R.VVNKQ*DIVPK.L	3	1139.65	27.95	-12.3721	1	1	0.96	1	54277027	69533022	0.78	0	14N
AT1G30510.3	ATRFNR2 (ROOT FNR 2); FAD binding / NADP or NADPH binding / electron carrier/ ferredoxin-NADP+ reductase/ oxidoreductase	K.VMLLPESDPNATHIMIATGTGVAPYR.G	3	2753.41	28.62	6.82793	1	1	0.84	3	9666732	14284361	0.68	0	14N
AT1G30510.3	ATRFNR2 (ROOT FNR 2); FAD binding / NADP or NADPH binding / electron carrier/ ferredoxin-NADP+ reductase/ oxidoreductase	R.MFMENVPNK.T	2	1108.52	30.4	4.42034	1	1	0.86	3	2296523	2089074	1.1	0	14N
AT1G30510.3	ATRFNR2 (ROOT FNR 2); FAD binding / NADP or NADPH binding / electron carrier/ ferredoxin-NADP+ reductase/ oxidoreductase	K.MYVQDKIEEYSDEIFK.L	3	2037.98	23.71	8.14891	1	1	0.84	4	3885985	4561489	0.85	0	14N
AT1G30510.3	ATRFNR2 (ROOT FNR 2); FAD binding / NADP or NADPH binding / electron carrier/ ferredoxin-NADP+ reductase/ oxidoreductase	K.VMLLPESDPNATHIMIATGTGVAPYR.G	3	2753.41	42.85	6.17419	2	2	0.93	3	15666977	9766253	1.6	0	15N
AT1G30510.3	ATRFNR2 (ROOT FNR 2); FAD binding / NADP or NADPH binding / electron carrier/ ferredoxin-NADP+ reductase/ oxidoreductase	K.MYVQDKIEEYSDEIFK.L	3	2035.96	22.78	3.92936	1	1	0.93	4	5373090	3316270	1.62	0	15N
AT1G30580.1	GTP binding	R.SLADMAPDEAAK.Y	2	1217.57	30.08	5.66704	1	1	0.89	1	928387	870862	1.07	0	14N
AT1G30580.1	GTP binding	R.AVDGIFHVLR.A	3	1125.65	22.66	8.26199	1	1	0.81	1	1912978	2189502	0.87	0	14N
AT1G30580.1	GTP binding	R.SLADMAPDEAAK.Y	2	1217.57	33.15	4.7636	1	1	0.92	1	1227880	1104288	1.11	0	15N
AT1G30580.1	GTP binding	R.AFEDADIIHVDDIVDPVRDLETITEELR.L	3	3238.64	29.92	7.58133	1	1	0.83	1	1217035	1484882	0.82	0	15N
AT1G30580.1	GTP binding	K.TGFSAINLIYFFTAGPDEVK.C	2	2189.13	32.57	7.7657	1	1	0.86	1	1291263	1653769	0.78	0	15N
AT1G30580.1	GTP binding	R.AVDGIFHVLR.A	3	1125.65	29.54	7.81779	1	1	0.94	1	2904457	2174314	1.34	0	15N
AT1G31180.1	3-isopropylmalate dehydrogenase, chloroplast, putative	K.ANPLATILSAAMLLK.Y	2	1525.91	58.95	7.20887	4	4	0.89	4	1750824	2377471	0.725	0.0173205	14N
AT1G31180.1	3-isopropylmalate dehydrogenase, chloroplast, putative	K.ANPLATILSAAMLLK.Y	2	1525.91	83.48	5.9637	5	5	0.98	4	3148374	2043400	1.576	0.049295	15N
AT1G31180.1	3-isopropylmalate dehydrogenase, chloroplast, putative	R.ELTGGIYFGEPR.G	2	1337.67	59.3	3.88736	1	1	0.9	5	3015151	1498044	2.01	0	15N
AT1G31480.1	SGR2 (SHOOT GRAVITROPISM 2); phospholipase A1	K.SDQLNNPEKITGQDNN*TM#AK.E	3	2234	21.14	-10.6982	1	1	0.86	1	13240965	177824	74.46	0	15N
AT1G31812.1	ACBP6 (acyl-CoA-binding protein 6); acyl-CoA binding / phosphatidylcholine binding	K.VNTLTELPSNEDLLILYGLYK.Q	3	2407.31	23.44	7.22803	1	1	0.49	1	1848957	4780449	0.39	0	14N
AT1G31812.1	ACBP6 (acyl-CoA-binding protein 6); acyl-CoA binding / phosphatidylcholine binding	K.SSEEAMNDYITK.V	2	1386.61	64.55	2.45203	1	1	0.93	1	1943774	2014399	0.96	0	14N
AT1G31812.1	ACBP6 (acyl-CoA-binding protein 6); acyl-CoA binding / phosphatidylcholine binding	K.SSEEAMNDYITK.V	2	1386.61	57.95	2.37991	1	1	0.97	1	2830105	2233326	1.27	0	15N
AT1G31812.1	ACBP6 (acyl-CoA-binding protein 6); acyl-CoA binding / phosphatidylcholine binding	K.VNTLTELPSNEDLLILYGLYK.Q	2	2407.31	28.84	6.81262	1	1	0.94	1	4651097	4434539	1.05	0	15N
AT1G31910.1	GHMP kinase family protein	R.FSPEVLSFAQVAVTGLPLNEVIGTILK.G	3	2841.61	27.38	4.01183	1	1	0.75	1	957367	966932	0.99	0	15N
AT1G33120.1	60S ribosomal protein L9 (RPL90B)	R.KVEMLDGVTIVR.S	3	1358.78	25.37	6.47646	1	1	0.83	1	4049040	6012199	0.67	0	14N
AT1G33120.1	60S ribosomal protein L9 (RPL90B)	K.FLDGIYVSEK.S	2	1169.61	38.14	5.12994	1	1	0.89	2	2449806	2819217	0.87	0	14N
AT1G33120.1	60S ribosomal protein L9 (RPL90B)	R.FVYAHFPINASIGGDGK.S	3	1791.9	33.6	0.111613	1	1	0.93	1	8753190	8574011	1.02	0	14N
AT1G33120.1	60S ribosomal protein L9 (RPL90B)	K.TILSSETMDIPDSVTIK.V	2	1848.97	59.9	12.764	1	1	0.96	1	5052393	7402316	0.68	0	14N
AT1G33120.1	60S ribosomal protein L9 (RPL90B)	K.IDSWFGTR.K	2	980.476	35.13	-3.67167	1	1	0.85	1	2493705	1322689	1.89	0	15N
AT1G33120.1	60S ribosomal protein L9 (RPL90B)	R.FVYAHFPINASIGGDGK.S	3	1791.91	54.25	2.06484	1	1	0.98	1	12469086	10352770	1.2	0	15N
AT1G33120.1	60S ribosomal protein L9 (RPL90B)	K.FLDGIYVSEK.S	2	1169.61	30.4	4.87344	1	1	0.88	2	4067598	3361268	1.21	0	15N
AT1G33120.1	60S ribosomal protein L9 (RPL90B)	K.TILSSETMDIPDSVTIK.V	2	1848.96	36.26	4.54313	1	1	0.94	1	9275196	9186217	1.01	0	15N
AT1G33120.1	60S ribosomal protein L9 (RPL90B)	R.TALSHVDNLISGVTR.G	2	1581.87	51.98	11.379	1	1	0.89	1	2036009	5863172	0.35	0	15N
AT1G34510.1	peroxidase, putative	K.TVSCADIVTIATR.D	2	1405.74	52.2	4.7662	1	1	0.94	1	1889246	4787865	0.39	0	14N
AT1G34510.1	peroxidase, putative	K.TVSCADIVTIATR.D	2	1405.74	56.32	4.7662	1	1	0.77	1	4535495	7596304	0.6	0	15N
AT1G35160.1	GF14 PHI (GF14 PROTEIN PHI CHAIN); protein binding / protein phosphorylated amino acid binding	K.AAQDIANAELAPTHPIR.L	3	1786.95	21.36	2.91	1	1	0.89	1	3311220	4900107	0.68	0	14N
AT1G35160.1	GF14 PHI (GF14 PROTEIN PHI CHAIN); protein binding / protein phosphorylated amino acid binding	K.DAAEHTLTAYK.A	2	1218.6	40.03	4.9237	1	1	0.92	3	512319	556741	0.92	0	14N
AT1G35160.1	GF14 PHI (GF14 PROTEIN PHI CHAIN); protein binding / protein phosphorylated amino acid binding	K.DAAEHTLTAYK.A	2	1218.6	24.6	3.8569	1	1	0.86	3	760497	482773	1.58	0	15N
AT1G35580.1	CINV1 (cytosolic invertase 1); beta-fructofuranosidase	R.DFVPSALAFLMNGEPDIVK.H	2	2062.07	62.72	7.12882	1	1	0.83	6	1184282	2220626	0.53	0	14N
AT1G35580.1	CINV1 (cytosolic invertase 1); beta-fructofuranosidase	R.DFVPSALAFLMNGEPDIVK.H	2	2062.06	32.95	6.06192	1	1	0.95	6	1172067	1403941	0.83	0	15N
AT1G35580.1	CINV1 (cytosolic invertase 1); beta-fructofuranosidase	R.SMSELSTGYSR.H	2	1216.55	41.9	0.986398	1	1	0.91	2	396258	264632	1.5	0	15N
AT1G35720.1	ANNAT1 (ANNEXIN ARABIDOPSIS 1); ATP binding / calcium ion binding / calcium-dependent phospholipid binding / copper ion binding / peroxidase/ protein homodimerization	R.YEGDEVNMTLAK.Q	2	1368.63	67.92	2.99569	1	1	0.9	1	7823359	6653452	1.18	0	14N
AT1G35720.1	ANNAT1 (ANNEXIN ARABIDOPSIS 1); ATP binding / calcium ion binding / calcium-dependent phospholipid binding / copper ion binding / peroxidase/ protein homodimerization	R.TAFEGWGTNEDLIISILAHR.S	3	2242.16	48.34	7.71582	3	3	0.9	1	37232734	38890684	0.96	0	14N
AT1G35720.1	ANNAT1 (ANNEXIN ARABIDOPSIS 1); ATP binding / calcium ion binding / calcium-dependent phospholipid binding / copper ion binding / peroxidase/ protein homodimerization	R.STIQCLTRPELYFVDVLR.S	3	2209.19	28.92	10.4112	2	2	0.83	1	39424345	50984561	0.77	0	14N
AT1G35720.1	ANNAT1 (ANNEXIN ARABIDOPSIS 1); ATP binding / calcium ion binding / calcium-dependent phospholipid binding / copper ion binding / peroxidase/ protein homodimerization	K.VSDSVPAPSDDAEQLR.T	2	1684.8	42.72	2.31482	2	2	0.98	1	21674453	21615529	1	0	14N
AT1G35720.1	ANNAT1 (ANNEXIN ARABIDOPSIS 1); ATP binding / calcium ion binding / calcium-dependent phospholipid binding / copper ion binding / peroxidase/ protein homodimerization	R.DALLANEATKR.W	2	1200.66	32.14	4.58084	1	1	0.91	1	294532	299540	0.98	0	14N
AT1G35720.1	ANNAT1 (ANNEXIN ARABIDOPSIS 1); ATP binding / calcium ion binding / calcium-dependent phospholipid binding / copper ion binding / peroxidase/ protein homodimerization	K.SLEEGDDDDKFLALLR.S	2	1834.91	80.89	5.39538	4	4	0.92	1	31248165	33539221	0.8675	0.125	14N
AT1G35720.1	ANNAT1 (ANNEXIN ARABIDOPSIS 1); ATP binding / calcium ion binding / calcium-dependent phospholipid binding / copper ion binding / peroxidase/ protein homodimerization	R.YQDDHGEEILK.S	2	1345.63	34.39	1.85788	1	1	0.94	1	514807	496790	1.04	0	14N
AT1G35720.1	ANNAT1 (ANNEXIN ARABIDOPSIS 1); ATP binding / calcium ion binding / calcium-dependent phospholipid binding / copper ion binding / peroxidase/ protein homodimerization	K.AQINATFNR.Y	2	1033.54	34.99	4.741	1	1	0.98	1	2215773	2044265	1.08	0	14N
AT1G35720.1	ANNAT1 (ANNEXIN ARABIDOPSIS 1); ATP binding / calcium ion binding / calcium-dependent phospholipid binding / copper ion binding / peroxidase/ protein homodimerization	R.WTSSNQVLMEVACTR.T	2	1780.84	66.14	7.24381	1	1	0.78	1	3430054	3127079	1.1	0	14N
AT1G35720.1	ANNAT1 (ANNEXIN ARABIDOPSIS 1); ATP binding / calcium ion binding / calcium-dependent phospholipid binding / copper ion binding / peroxidase/ protein homodimerization	K.LLVSLVTSYR.Y	2	1149.7	38.98	10.2637	2	2	0.99	1	6018760	5824235	1.03	0	14N
AT1G35720.1	ANNAT1 (ANNEXIN ARABIDOPSIS 1); ATP binding / calcium ion binding / calcium-dependent phospholipid binding / copper ion binding / peroxidase/ protein homodimerization	K.MLVALLGEDDA.-	2	1145.58	51.91	7.76905	1	1	0.88	1	5216334	5231861	1	0	14N
AT1G35720.1	ANNAT1 (ANNEXIN ARABIDOPSIS 1); ATP binding / calcium ion binding / calcium-dependent phospholipid binding / copper ion binding / peroxidase/ protein homodimerization	R.SKAQINATFNR.Y	3	1248.67	25.03	3.36359	1	1	0.77	1	720797	649969	1.11	0	14N
AT1G35720.1	ANNAT1 (ANNEXIN ARABIDOPSIS 1); ATP binding / calcium ion binding / calcium-dependent phospholipid binding / copper ion binding / peroxidase/ protein homodimerization	R.AILLWTLEPGER.D	2	1396.79	31.32	6.08543	1	1	0.97	1	6371994	5852090	1.09	0	14N
AT1G35720.1	ANNAT1 (ANNEXIN ARABIDOPSIS 1); ATP binding / calcium ion binding / calcium-dependent phospholipid binding / copper ion binding / peroxidase/ protein homodimerization	K.TLDKELSNDFER.A	2	1465.72	39.71	3.07018	2	2	0.98	1	2989699	2782529	1.035	0.0494975	14N
AT1G35720.1	ANNAT1 (ANNEXIN ARABIDOPSIS 1); ATP binding / calcium ion binding / calcium-dependent phospholipid binding / copper ion binding / peroxidase/ protein homodimerization	R.YEGDEVNMTLAK.Q	2	1368.63	61.02	1.97277	1	1	0.91	1	11227059	11498064	0.98	0	15N
AT1G35720.1	ANNAT1 (ANNEXIN ARABIDOPSIS 1); ATP binding / calcium ion binding / calcium-dependent phospholipid binding / copper ion binding / peroxidase/ protein homodimerization	R.STIQCLTRPELYFVDVLR.S	3	2211.2	30.43	11.2671	2	2	0.96	1	34347901	45009676	0.76	0	15N
AT1G35720.1	ANNAT1 (ANNEXIN ARABIDOPSIS 1); ATP binding / calcium ion binding / calcium-dependent phospholipid binding / copper ion binding / peroxidase/ protein homodimerization	K.VSDSVPAPSDDAEQLR.T	2	1684.8	41.38	3.44255	1	1	0.99	1	30938032	28612640	1.08	0	15N
AT1G35720.1	ANNAT1 (ANNEXIN ARABIDOPSIS 1); ATP binding / calcium ion binding / calcium-dependent phospholipid binding / copper ion binding / peroxidase/ protein homodimerization	R.DALLANEATKR.W	2	1200.66	23.77	7.99564	1	1	0.92	1	559385	567764	0.99	0	15N
AT1G35720.1	ANNAT1 (ANNEXIN ARABIDOPSIS 1); ATP binding / calcium ion binding / calcium-dependent phospholipid binding / copper ion binding / peroxidase/ protein homodimerization	R.YQDDHGEEILK.S	2	1345.63	26.3	7.80308	1	1	0.94	1	636335	654749	0.97	0	15N
AT1G35720.1	ANNAT1 (ANNEXIN ARABIDOPSIS 1); ATP binding / calcium ion binding / calcium-dependent phospholipid binding / copper ion binding / peroxidase/ protein homodimerization	K.SLEEDVAHHTTGDFR.K	3	1712.79	27.66	5.6633	1	1	0.93	1	3745966	3524645	1.06	0	15N
AT1G35720.1	ANNAT1 (ANNEXIN ARABIDOPSIS 1); ATP binding / calcium ion binding / calcium-dependent phospholipid binding / copper ion binding / peroxidase/ protein homodimerization	K.LLVSLVTSYR.Y	2	1149.69	60.27	6.17561	1	1	0.95	1	9299633	9979949	0.93	0	15N
AT1G35720.1	ANNAT1 (ANNEXIN ARABIDOPSIS 1); ATP binding / calcium ion binding / calcium-dependent phospholipid binding / copper ion binding / peroxidase/ protein homodimerization	R.TAFEGWGTNEDLIISILAHR.S	3	2242.16	58.62	8.11722	3	3	0.79	1	37742017	40334610	0.94	0	15N
AT1G35720.1	ANNAT1 (ANNEXIN ARABIDOPSIS 1); ATP binding / calcium ion binding / calcium-dependent phospholipid binding / copper ion binding / peroxidase/ protein homodimerization	K.SLEEGDDDDKFLALLR.S	2	1834.92	86.51	8.8833	4	4	0.92	1	31173308	34359820	0.905	0.01	15N
AT1G35720.1	ANNAT1 (ANNEXIN ARABIDOPSIS 1); ATP binding / calcium ion binding / calcium-dependent phospholipid binding / copper ion binding / peroxidase/ protein homodimerization	K.AQINATFNR.Y	2	1033.54	43.76	4.93451	1	1	0.94	1	2895539	3054021	0.95	0	15N
AT1G35720.1	ANNAT1 (ANNEXIN ARABIDOPSIS 1); ATP binding / calcium ion binding / calcium-dependent phospholipid binding / copper ion binding / peroxidase/ protein homodimerization	K.MLVALLGEDDA.-	2	1145.58	30.81	5.58673	1	1	0.89	1	4067667	4276230	0.95	0	15N
AT1G35720.1	ANNAT1 (ANNEXIN ARABIDOPSIS 1); ATP binding / calcium ion binding / calcium-dependent phospholipid binding / copper ion binding / peroxidase/ protein homodimerization	R.AILLWTLEPGER.D	2	1396.79	43.34	6.30021	2	2	0.85	1	16044344	22902368	0.7	0	15N
AT1G36240.1	60S ribosomal protein L30 (RPL30A)	R.SEIEYYAMLAK.V	2	1316.64	46.09	3.49374	1	1	0.89	3	2616984	3497121	0.75	0	14N
AT1G36240.1	60S ribosomal protein L30 (RPL30A)	R.VSCLSIVDPGDSDIIK.S	2	1716.89	42.48	12.1151	1	1	0.94	3	4716171	6818142	0.69	0	14N
AT1G36240.1	60S ribosomal protein L30 (RPL30A)	R.SEIEYYAMLAK.V	2	1317.65	61.7	7.55362	1	1	0.93	3	4439604	3287132	1.35	0	15N
AT1G36240.1	60S ribosomal protein L30 (RPL30A)	R.VSCLSIVDPGDSDIIK.S	2	1716.87	51.7	3.14526	2	2	0.95	3	9283246	7637312	1.22	0	15N
AT1G41830.1	SKS6 (SKU5-SIMILAR 6); pectinesterase	R.YGVNSVSFVPADTPLK.L	2	1692.89	24.93	8.15179	1	1	0.91	1	1193400	566171	2.11	0	14N
AT1G41830.1	SKS6 (SKU5-SIMILAR 6); pectinesterase	K.DQIGSFYYFPSLAFHK.A	3	1918.95	32.4	8.75486	1	1	0.83	2	3481269	4842296	0.72	0	14N
AT1G41830.1	SKS6 (SKU5-SIMILAR 6); pectinesterase	R.ILSRPGIPVPFADPAGDYTVLIGDWYK.F	3	2960.58	25.09	7.98951	1	1	0.94	1	2570048	3394725	0.76	0	15N
AT1G43170.1	ARP1 (ARABIDOPSIS RIBOSOMAL PROTEIN 1); structural constituent of ribosome	K.FIDTASIFGHGR.F	3	1319.68	23.77	6.441	1	1	0.9	2	11644914	15038933	0.77	0	14N
AT1G43170.1	ARP1 (ARABIDOPSIS RIBOSOMAL PROTEIN 1); structural constituent of ribosome	K.VDFAYSFFEK.Q	2	1251.6	29.59	5.75269	1	1	0.87	2	6067158	6630825	0.91	0	14N
AT1G43170.1	ARP1 (ARABIDOPSIS RIBOSOMAL PROTEIN 1); structural constituent of ribosome	K.VGTEAHTAMTEYDR.T	3	1579.71	38.18	5.44407	1	1	0.98	2	2638621	3471724	0.76	0	14N
AT1G43170.1	ARP1 (ARABIDOPSIS RIBOSOMAL PROTEIN 1); structural constituent of ribosome	K.QIPIEAVFQKDEMIDIIGVTK.G	3	2386.3	22.48	2.97533	1	1	0.96	2	8958617	8371652	1.07	0	15N
AT1G43170.1	ARP1 (ARABIDOPSIS RIBOSOMAL PROTEIN 1); structural constituent of ribosome	K.FIDTASIFGHGR.F	3	1319.68	31.16	4.69814	2	2	0.97	2	15711606	13482550	1.17	0	15N
AT1G43170.1	ARP1 (ARABIDOPSIS RIBOSOMAL PROTEIN 1); structural constituent of ribosome	K.VDFAYSFFEK.Q	2	1251.6	39.82	6.71147	2	2	0.95	2	8601189	6500874	1.32	0	15N
AT1G43170.1	ARP1 (ARABIDOPSIS RIBOSOMAL PROTEIN 1); structural constituent of ribosome	K.VGTEAHTAMTEYDR.T	3	1579.71	44.87	4.55782	1	1	0.99	2	6619473	6015293	1.1	0	15N
AT1G45000.1	26S proteasome regulatory complex subunit p42D, putative	R.EVDPVVYNMLHEDPGN*ISYSAVGGLGDQIR.E	3	3244.58	50.98	11.9277	1	1	0.88	3	979533	1431014	0.68	0	14N
AT1G45000.1	26S proteasome regulatory complex subunit p42D, putative	R.FSEGTSADREIQR.T	3	1494.72	31.75	2.8099	1	1	0.9	3	341002	459386	0.74	0	14N
AT1G45000.1	26S proteasome regulatory complex subunit p42D, putative	R.EVDPVVYNMLHEDPGN*ISYSAVGGLGDQIR.E	3	3244.58	43.89	11.8353	1	1	0.87	3	1602450	1619129	0.99	0	15N
AT1G45000.1	26S proteasome regulatory complex subunit p42D, putative	R.ESIELPLMNPELFLR.V	2	1799.97	51.41	6.0557	1	1	0.85	3	2001419	3178092	0.63	0	15N
AT1G45000.1	26S proteasome regulatory complex subunit p42D, putative	K.SLQSVGQIIGEVLRPLDNER.L	3	2222.22	28.94	4.09502	1	1	0.89	3	1605385	2159752	0.74	0	15N
AT1G45145.1	ATTRX5; oxidoreductase, acting on sulfur group of donors, disulfide as acceptor	K.IDVDELQAVAQEFKVEAMPTFVFMK.E	3	2884.46	46.17	6.17103	1	1	0.93	1	9149732	19956979	0.46	0	14N
AT1G45145.1	ATTRX5; oxidoreductase, acting on sulfur group of donors, disulfide as acceptor	K.VEAMPTFVFMK.E	2	1298.66	24.88	6.54527	1	1	0.91	1	2878068	1988547	1.45	0	15N
AT1G45145.1	ATTRX5; oxidoreductase, acting on sulfur group of donors, disulfide as acceptor	K.IDVDELQAVAQEFK.V	2	1603.83	72.78	7.98096	1	1	0.94	1	3935577	2961672	1.33	0	15N
AT1G45145.1	ATTRX5; oxidoreductase, acting on sulfur group of donors, disulfide as acceptor	R.FIAPVFAEMAK.K	2	1222.66	30.16	8.83327	1	1	0.91	1	10224883	10352407	0.99	0	15N
AT1G45145.1	ATTRX5; oxidoreductase, acting on sulfur group of donors, disulfide as acceptor	K.FTNVVFFK.I	2	1000.55	39.72	5.29711	1	1	0.94	1	1791031	1790228	1	0	15N
AT1G45145.1	ATTRX5; oxidoreductase, acting on sulfur group of donors, disulfide as acceptor	K.IDVDELQAVAQEFKVEAMPTFVFMK.E	3	2884.46	39.86	5.02696	3	3	0.83	1	9928495	7926565	1.25	0	15N
AT1G45201.1	TLL1 (TRIACYLGLYCEROL LIPASE-LIKE 1); triacylglycerol lipase	R.FVYNNDVVPR.V	2	1221.63	30.93	5.97566	1	1	0.77	2	1115403	1506901	0.74	0	14N
AT1G45201.1	TLL1 (TRIACYLGLYCEROL LIPASE-LIKE 1); triacylglycerol lipase	R.VGDEDFGEFMK.G	2	1272.55	29.17	4.95072	1	1	0.95	2	969120	1228581	0.79	0	14N
AT1G45201.1	TLL1 (TRIACYLGLYCEROL LIPASE-LIKE 1); triacylglycerol lipase	R.VGDEDFGEFMK.G	2	1272.55	37.15	4.32206	1	1	0.95	2	1241260	1246343	1	0	15N
AT1G47128.1	RD21 (responsive to dehydration 21); cysteine-type endopeptidase/ cysteine-type peptidase	K.NGGIDTDKDYPYK.G	3	1484.69	33.5	4.98422	1	1	0.91	1	558877	543704	1.03	0	14N
AT1G47128.1	RD21 (responsive to dehydration 21); cysteine-type endopeptidase/ cysteine-type peptidase	K.VVTIDSYEDVPTYSEESLKK.A	3	2301.14	34	3.78074	1	1	0.96	1	20342889	24276695	0.84	0	14N
AT1G47128.1	RD21 (responsive to dehydration 21); cysteine-type endopeptidase/ cysteine-type peptidase	K.VVTIDSYEDVPTYSEESLKK.A	3	2301.14	26.3	2.73778	1	1	0.99	1	16038538	27904151	0.57	0	15N
AT1G47250.1	PAF2; endopeptidase/ peptidase/ threonine-type endopeptidase	R.NQYDTDVTTWSPTGR.L	2	1739.79	57.48	4.36836	1	1	0.95	2	976666	1170502	0.83	0	14N
AT1G47250.1	PAF2; endopeptidase/ peptidase/ threonine-type endopeptidase	R.NQYDTDVTTWSPTGR.L	2	1739.79	64.64	3.50618	1	1	0.97	2	1157468	1118028	1.04	0	15N
AT1G47260.1	GAMMA CA2 (GAMMA CARBONIC ANHYDRASE 2); carbonate dehydratase	R.AIYTVGNWIR.G	2	1191.65	33.01	3.77628	1	1	0.88	1	1535431	2280521	0.67	0	15N
AT1G47260.1	GAMMA CA2 (GAMMA CARBONIC ANHYDRASE 2); carbonate dehydratase	K.SFEQIEVER.A	2	1135.56	48.69	4.22699	1	1	0.98	1	28786324	28541707	1.01	0	15N
AT1G47420.1	FUNCTIONS IN: molecular_function unknown; INVOLVED IN: biological_process unknown; LOCATED IN: mitochondrion, nucleus; EXPRESSED IN: 26 plant structures; EXPRESSED DURING: 15 growth stages; BEST Arabidopsis thaliana protein match is: GAMMA CA2 (GAMMA CARBONIC ANHYDRASE 2); carbonate dehydratase (TAIR:AT1G47260.1); Has 85 Blast hits to 85 proteins in 16 species: Archae - 0; Bacteria - 0; Metazoa -…	K.MEIDDSIGMSGEGVKPLPNDITDALR.T	3	2772.35	44.18	5.69916	1	1	0.93	1	2788164	2948326	0.95	0	14N
AT1G47420.1	FUNCTIONS IN: molecular_function unknown; INVOLVED IN: biological_process unknown; LOCATED IN: mitochondrion, nucleus; EXPRESSED IN: 26 plant structures; EXPRESSED DURING: 15 growth stages; BEST Arabidopsis thaliana protein match is: GAMMA CA2 (GAMMA CARBONIC ANHYDRASE 2); carbonate dehydratase (TAIR:AT1G47260.1); Has 85 Blast hits to 85 proteins in 16 species: Archae - 0; Bacteria - 0; Metazoa -…	K.MEIDDSIGMSGEGVKPLPNDITDALR.T	3	2772.35	60.54	4.43669	1	1	0.98	1	2707187	2203675	1.23	0	15N
AT1G47600.1	BGLU34 (BETA GLUCOSIDASE 34); hydrolase, hydrolyzing O-glycosyl compounds / thioglucosidase	K.GSLDFLGLNYYVTQYATDAPPPTQLNAITDAR.V	3	3484.7	28.5	-5.96891	1	1	0.84	1	2323149	701110	3.31	0	14N
AT1G47600.1	BGLU34 (BETA GLUCOSIDASE 34); hydrolase, hydrolyzing O-glycosyl compounds / thioglucosidase	K.FWITLNQPFSLATK.G	2	1664.91	54.55	8.16866	1	1	0.89	1	2062294	2731265	0.76	0	14N
AT1G47600.1	BGLU34 (BETA GLUCOSIDASE 34); hydrolase, hydrolyzing O-glycosyl compounds / thioglucosidase	K.FWITLNQPFSLATK.G	2	1664.92	73.25	13.0338	1	1	0.74	1	1905662	3013625	0.63	0	15N
AT1G48030.1	mtLPD1 (mitochondrial lipoamide dehydrogenase 1); ATP binding / dihydrolipoyl dehydrogenase	K.VSSVEVDLPAMLAQK.D	2	1585.86	46.19	5.42297	1	1	0.93	2	3487514	3294728	1.06	0	14N
AT1G48030.1	mtLPD1 (mitochondrial lipoamide dehydrogenase 1); ATP binding / dihydrolipoyl dehydrogenase	R.GALGGTCLNVGCIPSK.A	2	1602.79	37.65	-0.187173	1	1	0.91	3	2156577	2763231	0.78	0	14N
AT1G48030.1	mtLPD1 (mitochondrial lipoamide dehydrogenase 1); ATP binding / dihydrolipoyl dehydrogenase	K.VSSVEVDLPAMLAQK.D	2	1585.85	50.49	2.58537	1	1	0.89	2	6080411	3641825	1.67	0	15N
AT1G48030.1	mtLPD1 (mitochondrial lipoamide dehydrogenase 1); ATP binding / dihydrolipoyl dehydrogenase	R.GALGGTCLNVGCIPSK.A	2	1602.8	60.52	2.93238	1	1	0.92	3	3304117	2839997	1.16	0	15N
AT1G48030.1	mtLPD1 (mitochondrial lipoamide dehydrogenase 1); ATP binding / dihydrolipoyl dehydrogenase	R.TPFTSGLDLEK.I	2	1206.63	37.59	7.54172	1	1	0.66	2	12243450	3458775	3.54	0	15N
AT1G48440.1	unknown protein	R.LSCSSEVCTATER.D	2	1498.65	62.24	3.93688	1	1	0.95	1	248680	257664	0.97	0	14N
AT1G48440.1	unknown protein	R.LSCSSEVCTATER.D	2	1498.65	34.34	3.87016	1	1	0.95	1	355876	322402	1.1	0	15N
AT1G48600.2	phosphoethanolamine N-methyltransferase 2, putative (NMT2)	R.SAETPSPEFAEYIK.Q	2	1567.75	24.89	0.255143	1	1	0.92	2	3196503	1382390	2.31	0	15N
AT1G48600.2	phosphoethanolamine N-methyltransferase 2, putative (NMT2)	K.AGEVIALDFIESAIQK.N	2	1702.94	62.92	8.80839	1	1	0.87	2	1994336	1671930	1.19	0	15N
AT1G48630.1	RACK1B_AT (RECEPTOR FOR ACTIVATED C KINASE 1 B); nucleotide binding	R.FSPNTLVPTIVSASWDK.T	2	1860.98	31.91	6.39451	1	1	0.93	2	5322308	6632405	0.8	0	14N
AT1G48630.1	RACK1B_AT (RECEPTOR FOR ACTIVATED C KINASE 1 B); nucleotide binding	K.LWNTLGECK.Y	2	1119.55	42.17	2.8583	1	1	0.92	3	7466919	10129405	0.74	0	14N
AT1G48630.1	RACK1B_AT (RECEPTOR FOR ACTIVATED C KINASE 1 B); nucleotide binding	R.FSPNTLVPTIVSASWDK.T	2	1860.98	33.47	3.38533	1	1	0.95	2	6324209	5835958	1.08	0	15N
AT1G48630.1	RACK1B_AT (RECEPTOR FOR ACTIVATED C KINASE 1 B); nucleotide binding	K.LYSLEAGSIIHSLCFSPNR.Y	3	2163.1	23.16	6.88831	1	1	0.77	2	5027853	6811067	0.74	0	15N
AT1G48630.1	RACK1B_AT (RECEPTOR FOR ACTIVATED C KINASE 1 B); nucleotide binding	K.DGVILLWDLAEGKK.L	3	1555.88	21.33	7.90555	1	1	0.84	2	2862045	2657942	1.08	0	15N
AT1G48830.1	40S ribosomal protein S7 (RPS7A)	R.TLTSVHEAILDDVVLPAEIVGK.R	3	2318.29	29.71	5.73701	1	1	0.89	1	3988643	6051864	0.66	0	15N
AT1G48830.1	40S ribosomal protein S7 (RPS7A)	K.GVELSELDEQVAQAFFDLENTNQELK.S	3	2965.43	20.56	0.404663	1	1	0.9	1	3155996	2842633	1.11	0	15N
AT1G48850.1	EMB1144 (embryo defective 1144); chorismate synthase	R.ISSGVSEGMTTGTPIHVFVPN*TDQR.G	3	2630.3	23.84	8.93444	1	1	0.89	3	1566315	2590013	0.6	0	14N
AT1G48850.1	EMB1144 (embryo defective 1144); chorismate synthase	R.VAFKPTSTIGR.K	3	1175.68	24.1	3.91265	1	1	0.98	1	1116825	1100151	1.02	0	15N
AT1G48860.2	3-phosphoshikimate 1-carboxyvinyltransferase, putative / 5-enolpyruvylshikimate-3-phosphate, putative / EPSP synthase, putative	R.ILLLAALSEGTTVVDNLLNSDDIN*YMLDALK.I	3	3347.78	33.95	7.94564	1	1	0.76	3	2388230	3764370	0.63	0	14N
AT1G48860.2	3-phosphoshikimate 1-carboxyvinyltransferase, putative / 5-enolpyruvylshikimate-3-phosphate, putative / EPSP synthase, putative	R.ILLLAALSEGTTVVDNLLNSDDIN*YMLDALK.I	4	3347.78	36.28	8.3937	1	1	0.88	3	476509	562378	0.85	0	15N
AT1G48860.2	3-phosphoshikimate 1-carboxyvinyltransferase, putative / 5-enolpyruvylshikimate-3-phosphate, putative / EPSP synthase, putative	R.ILLLAALSEGTTVVDN*LLN*SDDINYMLDALK.I	3	3350.78	53.48	10.5385	1	1	0.79	3	1765270	2922460	0.6	0	15N
AT1G48860.2	3-phosphoshikimate 1-carboxyvinyltransferase, putative / 5-enolpyruvylshikimate-3-phosphate, putative / EPSP synthase, putative	K.SDIELYLGNAGTAMRPLTAAVTAAGGNASYVLDGVPR.M	3	3691.91	59.35	7.38183	1	1	0.95	3	3060228	2517706	1.22	0	15N
AT1G48920.1	ATNUC-L1; nucleic acid binding / nucleotide binding	K.GFDASLSEDDIKNTLR.E	3	1779.87	22.08	-2.47209	1	1	0.75	1	2742349	2393621	1.15	0	14N
AT1G49240.1	ACT8 (ACTIN 8); copper ion binding / structural constituent of cytoskeleton	R.IAPEEHPVLLTEAPLNPK.A	3	1967.09	29.3	4.27029	2	2	0.98	3	31144046	44163241	0.71	0	14N
AT1G49240.1	ACT8 (ACTIN 8); copper ion binding / structural constituent of cytoskeleton	R.TTGIVLDSGDGVSHTVPIYEGFSLPHAILR.L	3	3150.66	42.41	5.17355	7	7	0.92	3	8825691	11380934	0.78	0.0571548	14N
AT1G49240.1	ACT8 (ACTIN 8); copper ion binding / structural constituent of cytoskeleton	R.GYMFTTTAER.E	2	1175.54	59.45	3.48777	3	3	0.92	4	15506767	19809357	0.78	1.82501e-08	14N
AT1G49240.1	ACT8 (ACTIN 8); copper ion binding / structural constituent of cytoskeleton	K.AEYDEAGPGIVHRK.C	4	1540.78	44.52	5.51672	1	1	0.9	2	1162979	1534871	0.76	0	14N
AT1G49240.1	ACT8 (ACTIN 8); copper ion binding / structural constituent of cytoskeleton	K.IWHHTFYNELR.I	3	1514.76	29.69	3.96105	2	2	0.7	9	13148972	10547174	1.25	0	14N
AT1G49240.1	ACT8 (ACTIN 8); copper ion binding / structural constituent of cytoskeleton	K.YPIEHGVVSNWDDMEK.I	3	1917.86	28.42	-0.938544	1	1	0.89	4	9890146	13572865	0.73	0	14N
AT1G49240.1	ACT8 (ACTIN 8); copper ion binding / structural constituent of cytoskeleton	K.AEYDEAGPGIVHR.K	3	1412.69	26.53	6.44167	1	1	0.99	2	8996682	11810548	0.76	0	14N
AT1G49240.1	ACT8 (ACTIN 8); copper ion binding / structural constituent of cytoskeleton	K.NYELPDGQVITIGAER.F	2	1773.89	54.29	-2.42404	2	2	0.93	4	32806914	43549082	0.75	0	14N
AT1G49240.1	ACT8 (ACTIN 8); copper ion binding / structural constituent of cytoskeleton	K.AEYDEAGPGIVHRK.C	4	1540.78	29.64	5.1273	1	1	0.9	2	478631	334502	1.43	0	15N
AT1G49240.1	ACT8 (ACTIN 8); copper ion binding / structural constituent of cytoskeleton	K.IWHHTFYNELR.I	3	1514.76	40.11	5.01733	2	2	0.82	9	19902283	14987585	1.33	0	15N
AT1G49240.1	ACT8 (ACTIN 8); copper ion binding / structural constituent of cytoskeleton	K.YPIEHGVVSNWDDMEK.I	3	1917.87	24.41	2.08565	2	2	0.98	4	17404325	14113751	1.23	0	15N
AT1G49240.1	ACT8 (ACTIN 8); copper ion binding / structural constituent of cytoskeleton	R.IAPEEHPVLLTEAPLNPK.A	3	1967.09	41.66	6.60878	1	1	0.99	3	41656408	37418572	1.11	0	15N
AT1G49240.1	ACT8 (ACTIN 8); copper ion binding / structural constituent of cytoskeleton	R.TTGIVLDSGDGVSHTVPIYEGFSLPHAILR.L	3	3150.65	54.03	1.46002	6	6	0.89	3	10489268	9235458	1.055	0.0814248	15N
AT1G49240.1	ACT8 (ACTIN 8); copper ion binding / structural constituent of cytoskeleton	R.GYMFTTTAER.E	2	1175.54	64.55	2.38189	3	3	0.97	4	19855481	18089003	1.1	0	15N
AT1G49240.1	ACT8 (ACTIN 8); copper ion binding / structural constituent of cytoskeleton	K.AEYDEAGPGIVHR.K	2	1412.68	51.39	2.47757	3	3	0.99	2	759111	1058284	0.986667	0.23094	15N
AT1G49240.1	ACT8 (ACTIN 8); copper ion binding / structural constituent of cytoskeleton	K.LSFVAVDYEQEMETSK.T	2	1874.88	59.03	5.22703	1	1	0.07	3	4334208	4449356	0.97	0	15N
AT1G49240.1	ACT8 (ACTIN 8); copper ion binding / structural constituent of cytoskeleton	K.NYELPDGQVITIGAER.F	2	1773.9	51.52	3.26964	2	2	0.98	4	40707509	36750769	1.11	0	15N
AT1G49760.1	PAB8 (POLY(A) BINDING PROTEIN 8); RNA binding / translation initiation factor	K.VTGMLLEMDQTEVLHLLESPEALK.A	3	2695.41	41.7	9.1267	1	1	0.71	2	4006691	5708602	0.7	0	14N
AT1G50200.1	ALATS (ALANYL-TRNA SYNTHETASE); ATP binding / alanine-tRNA ligase/ ligase, forming aminoacyl-tRNA and related compounds / nucleic acid binding / nucleotide binding	K.LATEAAESAASDGK.T	2	1319.63	44.89	4.16784	1	1	0.92	1	623960	581730	1.07	0	15N
AT1G50380.1	prolyl oligopeptidase family protein	K.KVEHVM#EM#FGDVR.V	4	1608.78	24.43	14.8937	1	1	0.91	1	1213170	120156	10.1	0	14N
AT1G50390.1	fructokinase-related	K.LLLVTLGEK.G	2	984.635	33.4	5.78898	2	2	0.9	4	6096725	8914435	0.68	0	14N
AT1G50390.1	fructokinase-related	K.LLLVTLGEK.G	2	984.635	30.46	4.87493	1	1	0.97	4	9670544	6491515	1.49	0	15N
AT1G50480.1	THFS (10-FORMYLTETRAHYDROFOLATE SYNTHETASE); ATP binding / copper ion binding / formate-tetrahydrofolate ligase	K.SYGASGVEYSDQAEK.Q	2	1589.7	84.69	4.21465	1	1	0.92	1	264957	366367	0.72	0	14N
AT1G51060.1	HTA10; DNA binding	R.VGAGAPVYLAAVLEYLAAEVLELAGN*AAR.D	4	2871.57	44.31	8.53199	1	1	0.64	4	1314189	1861146	0.71	0	14N
AT1G51060.1	HTA10; DNA binding	R.VGAGAPVYLAAVLEYLAAEVLELAGNAAR.D	3	2870.58	82.13	6.47957	7	7	0.67	4	1662965	1904822	0.844286	0.0113389	14N
AT1G51060.1	HTA10; DNA binding	K.LLGDVTIANGGVMPNIHNLLLPK.K	3	2398.37	21.75	7.50516	1	1	0.89	3	3159841	5012564	0.63	0	14N
AT1G51060.1	HTA10; DNA binding	K.LLGDVTIANGGVMPNIHN*LLLPK.K	3	2399.36	41.19	12.3784	1	1	0.8	3	1802689	2224499	0.81	0	15N
AT1G51060.1	HTA10; DNA binding	R.VGAGAPVYLAAVLEYLAAEVLELAGNAAR.D	3	2870.57	77.31	2.54306	9	9	0.83	4	2902576	2950749	0.925556	0.0792324	15N
AT1G51470.1	BGLU35 (BETA GLUCOSIDASE 35); catalytic/ cation binding / hydrolase, hydrolyzing O-glycosyl compounds	R.LTGGVDENGITYYNNLINELK.A	2	2339.18	41.28	3.84751	1	1	0.95	2	1926732	1672587	1.15	0	14N
AT1G51470.1	BGLU35 (BETA GLUCOSIDASE 35); catalytic/ cation binding / hydrolase, hydrolyzing O-glycosyl compounds	K.FWITLNQPLSLALK.G	2	1642.96	62.59	4.38235	1	1	0.77	1	2460907	2211145	1.11	0	15N
AT1G51470.1	BGLU35 (BETA GLUCOSIDASE 35); catalytic/ cation binding / hydrolase, hydrolyzing O-glycosyl compounds	R.IVEDYTNYAELLFQR.F	2	1872.95	65.56	10.1445	1	1	0.92	2	3163806	3009616	1.05	0	15N
AT1G51470.1	BGLU35 (BETA GLUCOSIDASE 35); catalytic/ cation binding / hydrolase, hydrolyzing O-glycosyl compounds	K.GSLDFLGLNYYVSQYATDAPPPTQPNAITDAR.V	3	3455.69	20.45	3.34196	1	1	0.9	1	2140803	1592036	1.34	0	15N
AT1G51470.1	BGLU35 (BETA GLUCOSIDASE 35); catalytic/ cation binding / hydrolase, hydrolyzing O-glycosyl compounds	K.IGTTLIGR.W	2	829.513	35.55	4.09881	1	1	0.94	3	620379	627496	0.99	0	15N
AT1G51650.1	ATP synthase epsilon chain, mitochondrial	K.WADGKPQKPVLR.S	3	1393.8	22.3	5.59625	1	1	0.92	1	938436	832090	1.13	0	15N
AT1G51680.1	4CL1 (4-COUMARATE:COA LIGASE 1); 4-coumarate-CoA ligase	K.LGVNQNDVVMLLLPN*CPEFVLSFLAASFR.G	3	3264.7	22.05	6.44836	1	1	0.79	3	727248	1044369	0.7	0	14N
AT1G51980.1	mitochondrial processing peptidase alpha subunit, putative	R.EQMSYTIDALK.T	2	1297.64	25.17	4.93207	1	1	0.86	2	1747331	1943336	0.9	0	14N
AT1G51980.1	mitochondrial processing peptidase alpha subunit, putative	K.TYVPEMVEVLIDSVR.N	3	1748.93	45.23	9.37727	2	2	0.91	3	2319024	3040909	0.795	0.0494975	14N
AT1G51980.1	mitochondrial processing peptidase alpha subunit, putative	R.EIEAIGGNTSASASR.E	2	1461.72	90.03	5.74668	1	1	0.85	3	916071	731485	1.25	0	15N
AT1G51980.1	mitochondrial processing peptidase alpha subunit, putative	R.MIAAEDIGR.Q	2	974.495	26.07	2.25758	1	1	0.91	3	2733547	1765761	1.55	0	15N
AT1G51980.1	mitochondrial processing peptidase alpha subunit, putative	R.AALTSLDMPLQGVSLPPPLADKVEPSK.L	3	2773.52	33	7.78799	1	1	0.89	2	6476346	6294331	1.03	0	15N
AT1G51980.1	mitochondrial processing peptidase alpha subunit, putative	K.TYVPEMVEVLIDSVR.N	2	1748.92	63.69	5.77503	5	5	0.92	3	5446505	4022734	1.276	0.105972	15N
AT1G51980.1	mitochondrial processing peptidase alpha subunit, putative	K.IASETTPNPAASIGLYVDCGSIYEAPYFHGATHLLER.M	4	4020.98	27.54	7.7726	1	1	0.88	2	5408986	4774386	1.13	0	15N
AT1G51980.1	mitochondrial processing peptidase alpha subunit, putative	R.NPAFLDWEVNEELRK.M	3	1858.94	20.58	4.7877	1	1	0.92	3	3621069	2916434	1.24	0	15N
AT1G51980.1	mitochondrial processing peptidase alpha subunit, putative	K.SAVLMNLESR.M	2	1118.59	29.19	3.84415	1	1	0.83	2	1935847	1257582	1.54	0	15N
AT1G51980.1	mitochondrial processing peptidase alpha subunit, putative	K.NPMGFLLEAIHSAGYSGPLASPLYAPESALDR.L	3	3343.69	34.83	7.89553	1	1	0.94	2	4250596	4043243	1.05	0	15N
AT1G51980.1	mitochondrial processing peptidase alpha subunit, putative	R.AALTSLDMPLQ*GVSLPPPLADKVEPSK.L	3	2774.51	33.96	7.4248	1	1	0.84	2	4864309	5788729	0.84	0	15N
AT1G52570.1	PLDALPHA2 (phosphlipase d alpha 2); phospholipase D	K.VILLVWDDR.T	2	1127.65	40.07	5.58688	2	2	0.91	1	4425461	6705231	0.66	0	14N
AT1G52570.1	PLDALPHA2 (phosphlipase d alpha 2); phospholipase D	K.DGLMATHDEETENFFR.G	3	1910.83	27.11	6.01836	1	1	0.85	2	3174825	2564711	1.24	0	15N
AT1G52570.1	PLDALPHA2 (phosphlipase d alpha 2); phospholipase D	K.VILLVWDDR.T	2	1127.65	43.94	6.47369	2	2	0.93	1	6479371	4307180	1.5	0	15N
AT1G52730.2	transducin family protein / WD-40 repeat family protein	K.SPVTSAEVSQDGR.Y	2	1331.65	77.39	4.28044	1	1	0.94	3	145457	105548	1.38	0	15N
AT1G52740.1	HTA9 (HISTONE H2A PROTEIN 9); DNA binding	R.VGATAAVYTAAILEYLTAEVLELAGNASK.D	3	2908.57	57.09	6.32617	2	2	0.92	1	3746122	4765737	0.8	0.0141421	14N
AT1G52740.1	HTA9 (HISTONE H2A PROTEIN 9); DNA binding	R.VGATAAVYTAAILEYLTAEVLELAGNASK.D	3	2908.57	64.9	4.9853	5	5	0.83	1	3676584	3600550	0.986	0.0760263	15N
AT1G53240.1	malate dehydrogenase (NAD), mitochondrial	K.LNPLVSSLSLYDIANTPGVAADVGHINTR.S	3	3006.6	66.31	5.48795	2	2	0.97	3	46761583	61502953	0.72	0.0565685	14N
AT1G53240.1	malate dehydrogenase (NAD), mitochondrial	K.ALEGADLVIIPAGVPR.K	2	1589.93	55.02	6.79279	2	2	0.95	3	14713411	20802819	0.71	0	14N
AT1G53240.1	malate dehydrogenase (NAD), mitochondrial	R.KVAILGAAGGIGQPLALLMK.L	3	1920.18	41.18	5.46827	1	1	0.92	1	2391319	2820112	0.85	0	14N
AT1G53240.1	malate dehydrogenase (NAD), mitochondrial	K.YCPHALINMISNPVNSTVPIAAEIFKK.A	4	3026.6	26.6	8.16103	1	1	0.84	1	16210552	22091473	0.73	0	14N
AT1G53240.1	malate dehydrogenase (NAD), mitochondrial	K.VAILGAAGGIGQPLALLMK.L	2	1792.08	79.74	6.08234	2	2	0.84	1	19074923	25478873	0.75	0	14N
AT1G53240.1	malate dehydrogenase (NAD), mitochondrial	K.GLNGVPDVIECSYVQSTITELPFFASK.V	3	2970.51	32.13	13.0282	1	1	0.86	1	5362692	6858874	0.78	0	14N
AT1G53240.1	malate dehydrogenase (NAD), mitochondrial	K.LFGVTTLDVVR.A	2	1218.71	66.32	7.13872	1	1	0.94	4	2401987	2723064	0.88	0	14N
AT1G53240.1	malate dehydrogenase (NAD), mitochondrial	K.ANVPVAEVN*VPVIGGHAGVTILPLFSQ*ATPQANLSSDILTALTK.R	4	4424.46	30.27	15.0529	1	1	0.8	1	7407563	12383503	0.6	0	14N
AT1G53240.1	malate dehydrogenase (NAD), mitochondrial	R.SEVVGYMGDDNLAK.A	2	1496.7	70.42	4.94425	1	1	0.96	1	9659772	10822264	0.89	0	14N
AT1G53240.1	malate dehydrogenase (NAD), mitochondrial	K.ANVPVAEVNVPVIGGHAGVTILPLFSQATPQAN*LSSDILTALTKR.T	4	4579.56	24.19	11.1584	1	1	0.79	1	5698998	8920578	0.64	0	14N
AT1G53240.1	malate dehydrogenase (NAD), mitochondrial	K.N*GVEEVLDLGPLSDFEKEGLEALKPELK.S	4	3068.61	21.18	8.53813	1	1	0.97	1	9897741	13001161	0.76	0	14N
AT1G53240.1	malate dehydrogenase (NAD), mitochondrial	K.KLFGVTTLDVVR.A	3	1346.81	45.3	7.35076	2	2	0.95	4	20430431	27440631	0.74	0	14N
AT1G53240.1	malate dehydrogenase (NAD), mitochondrial	K.ANVPVAEVNVPVIGGHAGVTILPLFSQATPQANLSSDILTALTK.R	4	4422.45	28.9	5.8339	1	1	0.79	1	10193290	12880912	0.79	0	14N
AT1G53240.1	malate dehydrogenase (NAD), mitochondrial	R.DDLFNINAGIVK.N	2	1317.71	48.46	5.23639	2	2	0.91	3	7268914	9981594	0.73	0	14N
AT1G53240.1	malate dehydrogenase (NAD), mitochondrial	R.KVAILGAAGGIGQPLALLMK.L	3	1920.18	36.76	5.36412	1	1	0.96	1	2911490	2572282	1.13	0	15N
AT1G53240.1	malate dehydrogenase (NAD), mitochondrial	K.YCPHALINMISNPVNSTVPIAAEIFKK.A	4	3026.6	21.48	7.86366	1	1	0.91	1	17744012	15824718	1.12	0	15N
AT1G53240.1	malate dehydrogenase (NAD), mitochondrial	R.SEVVGYMGDDNLAK.A	2	1496.7	73.13	4.00885	3	3	0.94	1	10539238	8059517	1.31	0	15N
AT1G53240.1	malate dehydrogenase (NAD), mitochondrial	K.ANVPVAEVNVPVIGGHAGVTILPLFSQATPQ*ANLSSDILTALTK.R	4	4424.46	30.27	10.6808	1	1	0.87	1	20169885	18345113	1.1	0	15N
AT1G53240.1	malate dehydrogenase (NAD), mitochondrial	K.KLFGVTTLDVVR.A	3	1346.81	45.64	6.60826	3	3	0.99	4	20901155	17698191	1.02	0.277128	15N
AT1G53240.1	malate dehydrogenase (NAD), mitochondrial	K.LNPLVSSLSLYDIANTPGVAADVGHINTR.S	3	3006.61	68.01	7.91596	2	2	0.98	3	61425394	52058318	0.99	0.268701	15N
AT1G53240.1	malate dehydrogenase (NAD), mitochondrial	K.ALEGADLVIIPAGVPR.K	2	1589.93	65.83	3.89956	4	4	0.92	3	22151077	18608287	1.06	0.26	15N
AT1G53240.1	malate dehydrogenase (NAD), mitochondrial	K.VAILGAAGGIGQPLALLMK.L	2	1792.08	86.08	4.91052	2	2	0.91	1	22994990	20038567	1.15	0	15N
AT1G53240.1	malate dehydrogenase (NAD), mitochondrial	K.LFGVTTLDVVR.A	2	1218.71	51.72	6.23613	1	1	0.97	4	5916587	4922324	1.2	0	15N
AT1G53240.1	malate dehydrogenase (NAD), mitochondrial	K.LNPLVSSLSLYDIANTPGVAADVGHIN*TR.S	3	3007.61	75.97	12.2025	1	1	0.95	3	50491404	52064658	0.97	0	15N
AT1G53240.1	malate dehydrogenase (NAD), mitochondrial	K.ANVPVAEVNVPVIGGHAGVTILPLFSQATPQANLSSDILTALTK.R	4	4422.45	23.61	5.94696	1	1	0.86	1	21454255	18517238	1.16	0	15N
AT1G53240.1	malate dehydrogenase (NAD), mitochondrial	R.DDLFNINAGIVK.N	2	1317.71	53.46	4.78106	1	1	0.93	3	10092362	8756952	1.15	0	15N
AT1G53240.1	malate dehydrogenase (NAD), mitochondrial	K.NGVEEVLDLGPLSDFEKEGLEALKPELK.S	3	3068.63	21.93	5.98037	1	1	0.87	1	2683112	3400707	0.79	0	15N
AT1G53310.1	ATPPC1 (PHOSPHOENOLPYRUVATE CARBOXYLASE 1); catalytic/ phosphoenolpyruvate carboxylase	R.FLDILQDLHGEDLR.E	3	1682.88	23.91	7.30894	1	1	0.82	2	3353246	3812979	0.88	0	14N
AT1G53310.1	ATPPC1 (PHOSPHOENOLPYRUVATE CARBOXYLASE 1); catalytic/ phosphoenolpyruvate carboxylase	R.ALLDEMAVVATEEYR.S	2	1708.86	40.38	7.84157	1	1	0.86	2	5371569	9675345	0.56	0	14N
AT1G53310.1	ATPPC1 (PHOSPHOENOLPYRUVATE CARBOXYLASE 1); catalytic/ phosphoenolpyruvate carboxylase	R.VTIDLIEMVFAK.G	2	1377.78	57.96	9.58073	2	2	0.97	2	3194052	42650148	0.07	0	14N
AT1G53310.1	ATPPC1 (PHOSPHOENOLPYRUVATE CARBOXYLASE 1); catalytic/ phosphoenolpyruvate carboxylase	R.VPYNAPLIQFSSWMGGDRDGNPR.V	3	2576.23	22.52	1.55266	1	1	0.84	3	11503661	12170384	0.95	0	14N
AT1G53310.1	ATPPC1 (PHOSPHOENOLPYRUVATE CARBOXYLASE 1); catalytic/ phosphoenolpyruvate carboxylase	R.LSAAWQLYK.A	2	1078.59	30.48	4.91383	1	1	0.87	2	1768977	1559416	1.13	0	14N
AT1G53310.1	ATPPC1 (PHOSPHOENOLPYRUVATE CARBOXYLASE 1); catalytic/ phosphoenolpyruvate carboxylase	R.SLCSCGDRPIADGSLLDFLR.Q	3	2252.09	30.95	0.997477	1	1	0.87	1	6578762	7041841	0.93	0	14N
AT1G53310.1	ATPPC1 (PHOSPHOENOLPYRUVATE CARBOXYLASE 1); catalytic/ phosphoenolpyruvate carboxylase	R.QVSTFGLSLVR.L	2	1205.69	41.57	3.15174	1	1	0.94	2	4709743	4796758	0.98	0	14N
AT1G53310.1	ATPPC1 (PHOSPHOENOLPYRUVATE CARBOXYLASE 1); catalytic/ phosphoenolpyruvate carboxylase	K.LLVSEELWPFGEK.L	2	1545.83	33.94	11.3856	1	1	0.87	1	2884432	3123094	0.92	0	14N
AT1G53310.1	ATPPC1 (PHOSPHOENOLPYRUVATE CARBOXYLASE 1); catalytic/ phosphoenolpyruvate carboxylase	R.AIPWIFAWTQTR.F	2	1488.81	49.95	8.73189	2	2	0.85	3	5980904	6099512	0.98	0	14N
AT1G53310.1	ATPPC1 (PHOSPHOENOLPYRUVATE CARBOXYLASE 1); catalytic/ phosphoenolpyruvate carboxylase	R.TPPTPQDEMR.A	2	1170.55	35.64	5.21126	1	1	0.98	3	1486984	1486013	1	0	14N
AT1G53310.1	ATPPC1 (PHOSPHOENOLPYRUVATE CARBOXYLASE 1); catalytic/ phosphoenolpyruvate carboxylase	K.LADLEAAPAAVAR.L	2	1266.71	59.81	3.23675	1	1	0.95	2	7209103	8540843	0.84	0	14N
AT1G53310.1	ATPPC1 (PHOSPHOENOLPYRUVATE CARBOXYLASE 1); catalytic/ phosphoenolpyruvate carboxylase	K.MASIDVHLR.Q	3	1040.56	28.5	5.38176	1	1	0.88	1	1259686	944944	1.33	0	14N
AT1G53310.1	ATPPC1 (PHOSPHOENOLPYRUVATE CARBOXYLASE 1); catalytic/ phosphoenolpyruvate carboxylase	R.VTIDLIEMVFAK.G	2	1377.78	69.39	8.27427	1	1	0.96	2	3946874	38609784	0.1	0	15N
AT1G53310.1	ATPPC1 (PHOSPHOENOLPYRUVATE CARBOXYLASE 1); catalytic/ phosphoenolpyruvate carboxylase	R.FHLPVWLGFGSAIR.H	3	1598.89	41.48	6.62964	1	1	0.88	1	2606578	2758937	0.94	0	15N
AT1G53310.1	ATPPC1 (PHOSPHOENOLPYRUVATE CARBOXYLASE 1); catalytic/ phosphoenolpyruvate carboxylase	K.GDPGIAALYDK.L	2	1118.57	37.14	4.3806	1	1	0.62	2	4854230	4187767	1.16	0	15N
AT1G53310.1	ATPPC1 (PHOSPHOENOLPYRUVATE CARBOXYLASE 1); catalytic/ phosphoenolpyruvate carboxylase	R.QVSTFGLSLVR.L	2	1206.69	27.26	4.35056	1	1	0.93	2	4905533	3571851	1.37	0	15N
AT1G53310.1	ATPPC1 (PHOSPHOENOLPYRUVATE CARBOXYLASE 1); catalytic/ phosphoenolpyruvate carboxylase	R.AIPWIFAWTQTR.F	2	1488.81	68.22	6.98551	2	2	0.93	3	10145330	7653243	1.32	0.0141421	15N
AT1G53310.1	ATPPC1 (PHOSPHOENOLPYRUVATE CARBOXYLASE 1); catalytic/ phosphoenolpyruvate carboxylase	R.VPYNAPLIQFSSWMGGDR.D	2	2037	91.33	6.08743	1	1	0.93	3	3308911	3438031	0.96	0	15N
AT1G53310.1	ATPPC1 (PHOSPHOENOLPYRUVATE CARBOXYLASE 1); catalytic/ phosphoenolpyruvate carboxylase	K.LADLEAAPAAVAR.L	2	1266.71	63.98	4.02621	1	1	0.98	2	8354346	6272349	1.33	0	15N
AT1G53310.1	ATPPC1 (PHOSPHOENOLPYRUVATE CARBOXYLASE 1); catalytic/ phosphoenolpyruvate carboxylase	K.MASIDVHLR.Q	3	1040.56	23.33	4.22853	1	1	0.9	1	1204052	1071664	1.12	0	15N
AT1G53310.1	ATPPC1 (PHOSPHOENOLPYRUVATE CARBOXYLASE 1); catalytic/ phosphoenolpyruvate carboxylase	R.FLDILQDLHGEDLR.E	3	1682.88	30.98	4.93205	2	2	0.92	2	13784158	10899312	1.26	0	15N
AT1G53310.1	ATPPC1 (PHOSPHOENOLPYRUVATE CARBOXYLASE 1); catalytic/ phosphoenolpyruvate carboxylase	R.LSAAWQLYK.A	2	1078.6	36.38	8.06609	1	1	0.93	2	1759612	1969621	0.89	0	15N
AT1G53310.1	ATPPC1 (PHOSPHOENOLPYRUVATE CARBOXYLASE 1); catalytic/ phosphoenolpyruvate carboxylase	K.KLEELGSVLTSLDPGDSIVIAK.A	3	2284.28	21.02	3.26086	1	1	0.93	1	3357161	4589241	0.73	0	15N
AT1G53310.1	ATPPC1 (PHOSPHOENOLPYRUVATE CARBOXYLASE 1); catalytic/ phosphoenolpyruvate carboxylase	R.SLCSCGDRPIADGSLLDFLR.Q	3	2251.1	44.83	6.93001	2	2	0.9	1	7330140	6523258	1.12	0	15N
AT1G53310.1	ATPPC1 (PHOSPHOENOLPYRUVATE CARBOXYLASE 1); catalytic/ phosphoenolpyruvate carboxylase	K.LLVSEELWPFGEK.L	2	1545.82	56.29	4.65774	1	1	0.98	1	2990611	3498123	0.85	0	15N
AT1G53310.1	ATPPC1 (PHOSPHOENOLPYRUVATE CARBOXYLASE 1); catalytic/ phosphoenolpyruvate carboxylase	K.NQTVDLVLTAHPTQSVR.R	3	1878.01	29.52	3.88711	1	1	0.82	3	10422746	9352566	1.11	0	15N
AT1G53580.1	GLY3 (GLYOXALASE II 3); hydrolase/ hydroxyacylglutathione hydrolase	R.ATPGHTAGCVTYVTGEGADQPQPR.M	3	2469.14	36.98	1.053	1	1	0.98	2	1480324	1441389	1.03	0	14N
AT1G53580.1	GLY3 (GLYOXALASE II 3); hydrolase/ hydroxyacylglutathione hydrolase	R.ATPGHTAGCVTYVTGEGADQPQPR.M	3	2469.15	42.27	3.56399	1	1	0.98	2	1690039	1399766	1.21	0	15N
AT1G53580.1	GLY3 (GLYOXALASE II 3); hydrolase/ hydroxyacylglutathione hydrolase	K.GFEVSTVGEEMQHNPR.L	3	1815.84	21.22	4.84627	1	1	0.94	1	1692837	1146921	1.48	0	15N
AT1G53750.1	RPT1A (REGULATORY PARTICLE TRIPLE-A 1A); ATPase	R.FDDGVGGDNEVQR.T	2	1406.62	68.09	3.48354	1	1	0.99	1	417939	550214	0.76	0	14N
AT1G53830.1	ATPME2; pectinesterase	R.DITFQNTAGPSK.H	2	1277.64	63.6	2.81771	1	1	0.89	2	2518817	2796799	0.9	0	15N
AT1G53850.1	PAE1; endopeptidase/ peptidase/ threonine-type endopeptidase	R.ITSPLLEPSSVEK.I	2	1398.78	37.69	4.86142	1	1	0.9	2	1168883	7512408	0.16	0	14N
AT1G53850.1	PAE1; endopeptidase/ peptidase/ threonine-type endopeptidase	R.FSYGEPMTVESTTQALCDLALR.F	2	2488.18	52.89	5.82758	1	1	0.94	2	1560444	1588017	0.98	0	15N
AT1G53850.1	PAE1; endopeptidase/ peptidase/ threonine-type endopeptidase	R.ITSPLLEPSSVEK.I	2	1398.77	33.78	4.07501	1	1	0.89	2	2830860	9591312	0.3	0	15N
AT1G54000.1	myrosinase-associated protein, putative	K.TLVAQGFWPYGK.S	2	1365.72	38.6	4.53974	1	1	0.98	1	6381804	14275983	0.45	0	14N
AT1G54000.1	myrosinase-associated protein, putative	K.FSDGLITPDFLAK.F	2	1422.75	27.67	4.99035	1	1	0.91	1	4317336	10498555	0.41	0	14N
AT1G54000.1	myrosinase-associated protein, putative	R.QEYNTGMDQCYEK.L	2	1664.65	44.58	0.480581	1	1	0.96	1	1417477	3505515	0.4	0	14N
AT1G54000.1	myrosinase-associated protein, putative	K.AANWNDDFVAK.S	2	1249.59	53.15	4.1614	1	1	0.97	1	3526285	7552673	0.47	0	14N
AT1G54000.1	myrosinase-associated protein, putative	R.GASFAVEGATLLGAPVESMTLNQQVK.K	2	2617.36	50.71	5.2343	2	2	0.94	1	3060660	1856095	1.61	0.0565685	15N
AT1G54000.1	myrosinase-associated protein, putative	K.FSDGLITPDFLAK.F	2	1422.76	29.23	6.74751	1	1	0.92	1	15081816	8990301	1.68	0	15N
AT1G54000.1	myrosinase-associated protein, putative	R.QEYNTGMDQCYEK.L	2	1664.65	53.39	0.480581	2	2	0.93	1	3337494	1654062	2.02	0	15N
AT1G54000.1	myrosinase-associated protein, putative	K.AANWNDDFVAK.S	2	1249.58	37.04	-0.480161	2	2	0.98	1	8032824	3615653	2.22	0	15N
AT1G54000.1	myrosinase-associated protein, putative	K.TLVAQGFWPYGK.S	2	1365.72	72.66	6.58995	2	2	0.83	1	18965452	7537901	2.52	0	15N
AT1G54000.1	myrosinase-associated protein, putative	R.NSPASAPFQFTVFDFYNAVLTR.T	3	2491.24	30.22	5.13803	3	3	0.76	1	15649495	7860029	1.99	0	15N
AT1G54000.1	myrosinase-associated protein, putative	K.IGPMLNEMAR.N	2	1130.57	34.31	6.8992	1	1	0.98	1	9050916	3934014	2.3	0	15N
AT1G54000.1	myrosinase-associated protein, putative	R.QEYNTGM#DQCYEK.L	2	1680.66	33.76	6.00959	1	1	0.94	1	144128	118863	1.21	0	15N
AT1G54010.1	myrosinase-associated protein, putative	K.FVIQTLAPLGCLPIVR.Q	2	1796.05	51.8	4.84397	3	3	0.96	2	19979929	50447057	0.4	0	14N
AT1G54010.1	myrosinase-associated protein, putative	R.TAPASAPFQFTVFDFYNAILTR.T	3	2476.27	21.31	8.8844	1	1	0.91	1	5222670	1762345	2.96	0	15N
AT1G54010.1	myrosinase-associated protein, putative	K.IGPMLNELAR.T	2	1112.61	42.7	3.59515	1	1	0.97	1	3225593	1313512	2.46	0	15N
AT1G54010.1	myrosinase-associated protein, putative	R.GASFAVADATLLGAPVESLTLNQQVR.K	3	2628.41	28.05	1.12103	1	1	0.92	1	3305701	1468848	2.25	0	15N
AT1G54010.1	myrosinase-associated protein, putative	K.FVIQTLAPLGCLPIVR.Q	2	1796.05	66.23	4.56558	4	4	0.96	2	39864392	20887092	1.9575	0.095	15N
AT1G54100.1	ALDH7B4 (Aldehyde Dehydrogenase 7B4); 3-chloroallyl aldehyde dehydrogenase/ oxidoreductase	R.VGSMVQQTVNAR.S	2	1288.67	62.52	3.72479	1	1	0.91	1	653419	875211	0.75	0	14N
AT1G54100.1	ALDH7B4 (Aldehyde Dehydrogenase 7B4); 3-chloroallyl aldehyde dehydrogenase/ oxidoreductase	R.VGSMVQQTVNAR.S	2	1288.66	65.11	0.620798	1	1	0.89	1	920431	1146287	0.8	0	15N
AT1G54100.1	ALDH7B4 (Aldehyde Dehydrogenase 7B4); 3-chloroallyl aldehyde dehydrogenase/ oxidoreductase	K.WQANGPLVSTLNPANNQPIAQVVEASLEDYEQGLK.A	3	3792.93	25.69	6.30124	1	1	0.94	1	2391228	2627856	0.91	0	15N
AT1G54270.1	EIF4A-2; ATP-dependent helicase/ translation initiation factor	R.SRDHTVSATHGDMDQNTR.D	4	2026.9	29.84	3.35488	1	1	0.82	5	2178062	2703777	0.81	0	14N
AT1G54270.1	EIF4A-2; ATP-dependent helicase/ translation initiation factor	K.FYNVVVEELPSNVADLL.-	2	1920.01	55.66	6.9271	2	2	0.85	4	9447399	12837698	0.74	0	14N
AT1G54270.1	EIF4A-2; ATP-dependent helicase/ translation initiation factor	K.MFVLDEADEMLSR.G	2	1554.72	88.26	5.78885	2	2	0.88	5	11976374	15755345	0.76	0	14N
AT1G54270.1	EIF4A-2; ATP-dependent helicase/ translation initiation factor	K.GLDVIQQAQSGTGK.T	2	1400.74	71.33	0.928085	1	1	0.9	5	3716413	4784006	0.78	0	14N
AT1G54270.1	EIF4A-2; ATP-dependent helicase/ translation initiation factor	R.GIYAYGFEKPSAIQQR.G	3	1826.95	24.9	5.69258	1	1	0.76	5	8971764	8988483	1	0	14N
AT1G54270.1	EIF4A-2; ATP-dependent helicase/ translation initiation factor	R.VLITTDLLAR.G	2	1113.69	48.58	4.75898	2	2	0.86	5	7876463	9331535	0.84	0	14N
AT1G54270.1	EIF4A-2; ATP-dependent helicase/ translation initiation factor	K.MFVLDEADEMLSR.G	2	1554.72	101.45	5.85317	3	3	0.91	5	15925841	12677724	1.26	0	15N
AT1G54270.1	EIF4A-2; ATP-dependent helicase/ translation initiation factor	R.VLITTDLLAR.G	2	1113.69	46.3	4.84877	2	2	0.9	5	10318322	7654962	1.35	0	15N
AT1G54270.1	EIF4A-2; ATP-dependent helicase/ translation initiation factor	K.IQVGVFSATMPPEALEITR.K	2	2058.1	36.95	5.05323	2	2	0.9	4	5317424	5150129	1.03	0	15N
AT1G54270.1	EIF4A-2; ATP-dependent helicase/ translation initiation factor	R.SRDHTVSATHGDMDQNTR.D	4	2026.9	27.78	2.81218	1	1	0.81	5	2463696	2013056	1.22	0	15N
AT1G54270.1	EIF4A-2; ATP-dependent helicase/ translation initiation factor	K.FYNVVVEELPSNVADLL.-	2	1920.01	56.93	5.46876	1	1	0.93	4	12451434	10327874	1.21	0	15N
AT1G54270.1	EIF4A-2; ATP-dependent helicase/ translation initiation factor	K.GLDVIQQAQSGTGK.T	2	1400.74	87.13	3.2126	2	2	0.92	5	6582008	5438053	1.21	0	15N
AT1G54580.1	ACP2 (ACYL CARRIER PROTEIN 2); acyl carrier	K.AQ*SIATVEQAAALIEELLFEK.A	3	2274.23	30.94	8.22265	1	1	0.82	1	7249691	12403267	0.58	0	14N
AT1G54580.1	ACP2 (ACYL CARRIER PROTEIN 2); acyl carrier	K.AQSIATVEQAAALIEELLFEK.A	2	2273.26	41.15	14.6048	5	5	0.9	1	1204726	1578675	0.796	0.0328634	14N
AT1G54580.1	ACP2 (ACYL CARRIER PROTEIN 2); acyl carrier	K.AQSIATVEQAAALIEELLFEK.A	2	2273.23	79.21	3.56322	6	6	0.91	1	5978343	6241057	0.925	0.0582237	15N
AT1G54630.1	ACP3 (ACYL CARRIER PROTEIN 3); acyl carrier	K.AQ*SIATVEQAAALIEELLLEK.A	2	2240.25	39.5	10.49	1	1	0.41	1	729197	1327154	0.55	0	14N
AT1G54630.1	ACP3 (ACYL CARRIER PROTEIN 3); acyl carrier	K.AQSIATVEQAAALIEELLLEK.A	3	2239.25	46.89	6.92199	2	2	0.91	1	7989901	9383820	0.85	0	14N
AT1G54630.1	ACP3 (ACYL CARRIER PROTEIN 3); acyl carrier	K.AQSIATVEQAAALIEELLLEK.A	3	2239.26	51.39	7.50255	4	4	0.95	1	9392861	9484201	0.9525	0.075	15N
AT1G55490.1	CPN60B (CHAPERONIN 60 BETA); ATP binding / protein binding	R.EVELEDPVENIGAK.L	2	1540.75	40.36	-10.7089	1	1	0.92	4	3816045	4526446	0.84	0	14N
AT1G55490.1	CPN60B (CHAPERONIN 60 BETA); ATP binding / protein binding	K.VVAAGANPVLITR.G	2	1279.77	48.39	3.2037	1	1	0.96	3	1812870	2512121	0.72	0	14N
AT1G55490.1	CPN60B (CHAPERONIN 60 BETA); ATP binding / protein binding	K.LADLVGVTLGPK.G	2	1181.71	46.6	4.06191	1	1	0.96	4	1322969	1707615	0.77	0	14N
AT1G55490.1	CPN60B (CHAPERONIN 60 BETA); ATP binding / protein binding	R.EVELEDPVEN*IGAK.L	2	1543.75	24.71	-5.13	1	1	0.92	4	3344026	3940397	0.85	0	14N
AT1G55490.1	CPN60B (CHAPERONIN 60 BETA); ATP binding / protein binding	R.GGYPILIIAEDIEQEALATLVVNK.L	3	2568.42	25.81	4.47747	2	2	0.86	2	2730476	3119631	0.88	0	14N
AT1G55490.1	CPN60B (CHAPERONIN 60 BETA); ATP binding / protein binding	K.VVAAGANPVLITR.G	2	1279.77	60.92	3.98509	1	1	0.98	3	2226473	1697365	1.31	0	15N
AT1G55490.1	CPN60B (CHAPERONIN 60 BETA); ATP binding / protein binding	R.DLVGVLEDAIR.G	2	1198.67	29.83	9.34374	1	1	0.86	2	1817126	1849367	0.98	0	15N
AT1G55490.1	CPN60B (CHAPERONIN 60 BETA); ATP binding / protein binding	R.GYISPYFVTDSEK.M	2	1504.73	35.7	6.57931	1	1	0.94	4	1541952	1543601	1	0	15N
AT1G55490.1	CPN60B (CHAPERONIN 60 BETA); ATP binding / protein binding	R.GGYPILIIAEDIEQEALATLVVNK.L	3	2568.43	42.45	5.10043	3	3	0.91	2	2398805	2472574	0.97	0	15N
AT1G56070.1	LOS1; copper ion binding / translation elongation factor/ translation factor, nucleic acid binding	K.RQETVEDVPCGNTVAMVGLDQFITK.N	3	2808.38	56.53	-0.537776	2	2	0.88	1	12961640	18365797	0.71	0	14N
AT1G56070.1	LOS1; copper ion binding / translation elongation factor/ translation factor, nucleic acid binding	K.AYLPVVESFGFSSQLR.A	2	1798.95	80.48	8.00474	2	2	0.89	1	14003619	23242127	0.6	0	14N
AT1G56070.1	LOS1; copper ion binding / translation elongation factor/ translation factor, nucleic acid binding	R.IRPVLTVNK.M	2	1038.67	40.67	4.7176	2	2	0.96	2	4354306	6313467	0.745	0.0777817	14N
AT1G56070.1	LOS1; copper ion binding / translation elongation factor/ translation factor, nucleic acid binding	R.LYMEARPMEEGLAEAIDDGR.I	3	2265.06	48.33	5.96014	1	1	0.87	1	12902620	17667528	0.73	0	14N
AT1G56070.1	LOS1; copper ion binding / translation elongation factor/ translation factor, nucleic acid binding	R.NCDPNGPLMLYVSK.M	2	1606.76	64.18	3.85871	2	2	0.93	1	10133460	13598273	0.75	0	14N
AT1G56070.1	LOS1; copper ion binding / translation elongation factor/ translation factor, nucleic acid binding	R.VMQTWLPASTALLEMMIFHLPSPHTAQR.Y	4	3205.66	41.39	9.17136	4	4	0.87	1	49061720	71239739	0.69	0	14N
AT1G56070.1	LOS1; copper ion binding / translation elongation factor/ translation factor, nucleic acid binding	R.DGNEYLIN*LIDSPGHVDFSSEVTAALR.I	3	2932.46	33.25	14.9706	1	1	0.73	2	5866909	9668133	0.61	0	14N
AT1G56070.1	LOS1; copper ion binding / translation elongation factor/ translation factor, nucleic acid binding	R.RVIYASQITAKPR.L	3	1501.89	45.19	2.92966	2	2	0.96	1	10696633	15568142	0.69	0	14N
AT1G56070.1	LOS1; copper ion binding / translation elongation factor/ translation factor, nucleic acid binding	K.KIWAFGPETTGPNMVVDMCK.G	3	2280.1	36.3	6.88572	2	2	0.91	1	6772940	8597523	0.79	0	14N
AT1G56070.1	LOS1; copper ion binding / translation elongation factor/ translation factor, nucleic acid binding	K.DLQDDFMGGAEIIK.S	2	1550.75	63.67	6.51303	1	1	0.87	1	6693027	9130556	0.73	0	14N
AT1G56070.1	LOS1; copper ion binding / translation elongation factor/ translation factor, nucleic acid binding	R.FFAFGR.V	2	743.388	24.32	6.72601	1	1	0.85	2	10523307	15139271	0.7	0	14N
AT1G56070.1	LOS1; copper ion binding / translation elongation factor/ translation factor, nucleic acid binding	K.NDEKELMGKPLMK.R	4	1531.79	21.24	5.74494	1	1	0.93	1	1793451	2076367	0.86	0	14N
AT1G56070.1	LOS1; copper ion binding / translation elongation factor/ translation factor, nucleic acid binding	K.STLTDSLVAAAGIIAQEVAGDVR.M	2	2256.22	101.19	7.13588	13	13	0.84	1	6820306	10181649	0.685385	0.00877058	14N
AT1G56070.1	LOS1; copper ion binding / translation elongation factor/ translation factor, nucleic acid binding	R.LLEPVYMVEIQAPEGALGGIYSVLNQK.R	3	2930.57	48.23	4.4019	4	4	0.9	2	35159934	54072729	0.65	0	14N
AT1G56070.1	LOS1; copper ion binding / translation elongation factor/ translation factor, nucleic acid binding	R.LWGENFFDPATR.K	2	1452.71	25.1	12.9128	1	1	0.66	1	19284198	8263547	2.33	0	14N
AT1G56070.1	LOS1; copper ion binding / translation elongation factor/ translation factor, nucleic acid binding	K.IWAFGPETTGPNMVVDMCK.G	2	2152	81.1	4.04278	2	2	0.93	1	7180787	9570247	0.75	0	14N
AT1G56070.1	LOS1; copper ion binding / translation elongation factor/ translation factor, nucleic acid binding	R.VENLYEGPLDDQYANAIR.N	2	2079.02	77.04	8.17701	1	1	0.96	1	1725287	2116576	0.82	0	14N
AT1G56070.1	LOS1; copper ion binding / translation elongation factor/ translation factor, nucleic acid binding	K.EAMTPLSEFEDKL.-	2	1508.72	45.03	5.96534	2	2	0.86	1	15448455	21280524	0.73	0	14N
AT1G56070.1	LOS1; copper ion binding / translation elongation factor/ translation factor, nucleic acid binding	K.STGISLYYEMTDESLK.S	2	1835.87	61.52	4.90234	1	1	0.49	1	3690732	4874417	0.76	0	14N
AT1G56070.1	LOS1; copper ion binding / translation elongation factor/ translation factor, nucleic acid binding	R.YRVENLYEGPLDDQYANAIR.N	3	2398.17	66.58	2.62701	3	3	0.91	1	20558533	27278408	0.75	0	14N
AT1G56070.1	LOS1; copper ion binding / translation elongation factor/ translation factor, nucleic acid binding	K.RQETVEDVPCGNTVAMVGLDQFITK.N	3	2806.38	72.12	2.42306	3	3	0.73	1	16327077	15770760	1.04	0	15N
AT1G56070.1	LOS1; copper ion binding / translation elongation factor/ translation factor, nucleic acid binding	K.AYLPVVESFGFSSQLR.A	2	1798.95	86.04	9.22769	2	2	0.98	1	18420697	15242524	1.21	0	15N
AT1G56070.1	LOS1; copper ion binding / translation elongation factor/ translation factor, nucleic acid binding	R.IRPVLTVNK.M	3	1038.67	25.4	4.42877	2	2	0.99	2	6272613	5556853	1.13	0	15N
AT1G56070.1	LOS1; copper ion binding / translation elongation factor/ translation factor, nucleic acid binding	R.NCDPNGPLMLYVSK.M	2	1606.76	74.55	3.85871	3	3	0.96	1	14182670	10534289	1.35	0	15N
AT1G56070.1	LOS1; copper ion binding / translation elongation factor/ translation factor, nucleic acid binding	R.VIYASQITAKPR.L	2	1345.78	64.63	0.148613	1	1	0.98	1	766814	690684	1.11	0	15N
AT1G56070.1	LOS1; copper ion binding / translation elongation factor/ translation factor, nucleic acid binding	R.DGNEYLINLIDSPGHVDFSSEVTAALR.I	3	2931.44	39.11	3.78654	3	3	0.54	2	9575046	9122531	1.05	0	15N
AT1G56070.1	LOS1; copper ion binding / translation elongation factor/ translation factor, nucleic acid binding	K.KIWAFGPETTGPNMVVDMCK.G	3	2280.1	34.67	5.92084	2	2	0.78	1	9934327	9251346	1.07	0	15N
AT1G56070.1	LOS1; copper ion binding / translation elongation factor/ translation factor, nucleic acid binding	K.QIIATCMNDQK.D	2	1320.63	49.88	2.95315	1	1	0.95	1	1716682	1278227	1.34	0	15N
AT1G56070.1	LOS1; copper ion binding / translation elongation factor/ translation factor, nucleic acid binding	K.FSVSPVVR.V	2	889.515	25.25	6.07076	1	1	0.97	2	13299231	11147755	1.19	0	15N
AT1G56070.1	LOS1; copper ion binding / translation elongation factor/ translation factor, nucleic acid binding	K.STLTDSLVAAAGIIAQEVAGDVR.M	2	2256.22	101.59	5.31867	15	15	0.82	1	11631864	9970567	1.12467	0.0887103	15N
AT1G56070.1	LOS1; copper ion binding / translation elongation factor/ translation factor, nucleic acid binding	R.VIENANVIMATYEDPLLGDVQVYPEK.G	3	2919.49	29.74	9.35103	1	1	0.92	1	15892744	13119846	1.21	0	15N
AT1G56070.1	LOS1; copper ion binding / translation elongation factor/ translation factor, nucleic acid binding	K.IWAFGPETTGPNMVVDMCK.G	2	2151.99	78.68	2.3699	3	3	0.91	1	10123348	8353499	1.21	0	15N
AT1G56070.1	LOS1; copper ion binding / translation elongation factor/ translation factor, nucleic acid binding	R.VENLYEGPLDDQYANAIR.N	2	2079.01	73.03	4.66571	1	1	0.95	1	3140404	2379893	1.32	0	15N
AT1G56070.1	LOS1; copper ion binding / translation elongation factor/ translation factor, nucleic acid binding	K.STGISLYYEMTDESLK.S	2	1835.87	63.94	4.35764	1	1	0.66	1	5707413	4890836	1.17	0	15N
AT1G56070.1	LOS1; copper ion binding / translation elongation factor/ translation factor, nucleic acid binding	R.LYMEARPMEEGLAEAIDDGR.I	3	2265.07	33.39	7.46121	1	1	0.89	1	10206862	8657857	1.18	0	15N
AT1G56070.1	LOS1; copper ion binding / translation elongation factor/ translation factor, nucleic acid binding	R.VMQTWLPASTALLEMMIFHLPSPHTAQR.Y	4	3205.66	42.44	7.95475	4	4	0.87	1	47835357	42987721	1.11	0	15N
AT1G56070.1	LOS1; copper ion binding / translation elongation factor/ translation factor, nucleic acid binding	K.EGPLAEENMR.G	2	1144.53	41.49	1.39796	1	1	0.99	2	7700412	7083852	1.09	0	15N
AT1G56070.1	LOS1; copper ion binding / translation elongation factor/ translation factor, nucleic acid binding	K.DLQDDFMGGAEIIK.S	2	1550.74	84.43	4.38501	2	2	0.94	1	14910523	11851904	1.26	0	15N
AT1G56070.1	LOS1; copper ion binding / translation elongation factor/ translation factor, nucleic acid binding	R.AATSGQAFPQ*CVFDHWEMMSSDPLEPGTQASVLVADIR.K	3	4148.95	27.36	13.2324	1	1	0.71	1	6187438	6266997	0.99	0	15N
AT1G56070.1	LOS1; copper ion binding / translation elongation factor/ translation factor, nucleic acid binding	R.LLEPVYMVEIQAPEGALGGIYSVLNQK.R	3	2930.57	53.91	4.67488	4	4	0.92	2	59287745	56215748	1.05	0	15N
AT1G56070.1	LOS1; copper ion binding / translation elongation factor/ translation factor, nucleic acid binding	R.LWGENFFDPATR.K	2	1451.7	42.25	5.0975	2	2	0.98	1	16478338	8570007	1.92	0	15N
AT1G56070.1	LOS1; copper ion binding / translation elongation factor/ translation factor, nucleic acid binding	K.EAMTPLSEFEDKL.-	2	1508.73	65.09	7.29097	3	3	0.92	1	23753418	19959896	1.19	0	15N
AT1G56070.1	LOS1; copper ion binding / translation elongation factor/ translation factor, nucleic acid binding	R.GFVQFCYEPIK.Q	2	1386.68	27.12	3.38941	1	1	0.86	2	10339741	7595728	1.36	0	15N
AT1G56070.1	LOS1; copper ion binding / translation elongation factor/ translation factor, nucleic acid binding	K.SDPVVSFR.E	2	905.474	24.32	5.522	1	1	0.92	1	3143034	2194719	1.43	0	15N
AT1G56070.1	LOS1; copper ion binding / translation elongation factor/ translation factor, nucleic acid binding	R.YRVENLYEGPLDDQYANAIR.N	3	2398.17	55.98	2.9189	2	2	0.96	1	26534092	21951644	1.21	0	15N
AT1G56110.1	NOP56 (Arabidopsis homolog of nucleolar protein Nop56)	R.VDNMVIQAIFMLDTLDKDINSFAMR.V	3	2899.45	28.52	5.62178	1	1	0.8	2	1646190	2118253	0.78	0	14N
AT1G56110.1	NOP56 (Arabidopsis homolog of nucleolar protein Nop56)	K.MSDIAPNLAALIGEMVGAR.L	2	1928	52.83	3.47512	1	1	0.87	2	1337201	2078286	0.64	0	14N
AT1G56110.1	NOP56 (Arabidopsis homolog of nucleolar protein Nop56)	R.VVQLTAFHPFESALDALNQ*VNAVSEGVMTDELR.S	3	3600.83	30.1	12.9694	1	1	0.84	1	1786640	2957039	0.6	0	14N
AT1G56110.1	NOP56 (Arabidopsis homolog of nucleolar protein Nop56)	R.VVQ*LTAFHPFESALDALNQVNAVSEGVMTDELR.S	3	3601.82	29.88	8.62184	1	1	0.84	1	1786640	2957039	0.6	0	14N
AT1G56110.1	NOP56 (Arabidopsis homolog of nucleolar protein Nop56)	K.MSDIAPNLAALIGEMVGAR.L	2	1928	72.5	1.50415	3	3	0.87	2	1713983	2003745	0.896667	0.0635085	15N
AT1G56110.1	NOP56 (Arabidopsis homolog of nucleolar protein Nop56)	R.VDNMVIQAIFMLDTLDKDIN*SFAMR.V	3	2900.45	52.87	11.7224	1	1	0.69	2	2103891	2307687	0.91	0	15N
AT1G56110.1	NOP56 (Arabidopsis homolog of nucleolar protein Nop56)	R.VVQLTAFHPFESALDALNQVNAVSEGVMTDELR.S	3	3599.82	60.82	3.94466	3	3	0.92	1	2768803	2777917	1	0	15N
AT1G56190.1	phosphoglycerate kinase, putative	K.FLKPSVAGFLLQK.E	3	1446.88	28.5	6.91148	1	1	0.91	3	1480272	1918262	0.77	0	14N
AT1G56190.1	phosphoglycerate kinase, putative	K.GVTTIIGGGDSVAAVEK.V	2	1572.85	67.91	3.49685	2	2	0.88	4	4135081	5345892	0.76	0.0141421	14N
AT1G56190.1	phosphoglycerate kinase, putative	K.FLKPSVAGFLLQK.E	3	1446.88	43.8	7.53352	1	1	0.94	3	2050446	1727201	1.19	0	15N
AT1G56190.1	phosphoglycerate kinase, putative	R.GVSLLLPTDVVIADK.F	2	1538.91	43.79	3.44402	1	1	0.95	3	12661195	9138718	1.39	0	15N
AT1G56190.1	phosphoglycerate kinase, putative	K.GVTTIIGGGDSVAAVEK.V	2	1572.85	82.78	2.60674	1	1	0.88	4	6054919	4830668	1.25	0	15N
AT1G56330.1	ATSAR1B (SECRETION-ASSOCIATED RAS 1 B); GTP binding	K.VDAVVYLVDAYDKER.F	3	1753.91	26.96	5.87264	1	1	0.83	3	2110865	2476745	0.85	0	14N
AT1G56330.1	ATSAR1B (SECRETION-ASSOCIATED RAS 1 B); GTP binding	K.VDAVVYLVDAYDKER.F	3	1753.91	37.96	8.38134	1	1	0.95	3	2969319	2447890	1.21	0	15N
AT1G56330.1	ATSAR1B (SECRETION-ASSOCIATED RAS 1 B); GTP binding	R.ELDALLSDEALATVPFLILGNK.I	3	2341.32	26.17	13.4541	1	1	0.92	1	1232294	1422658	0.87	0	15N
AT1G56340.1	CRT1 (CALRETICULIN 1); calcium ion binding / unfolded protein binding	K.EVPCETDQLTHVYTFVLRPDATYSILIDNVEK.Q	4	3766.9	27.18	6.21291	1	1	0.78	2	9295035	12290255	0.76	0	14N
AT1G56340.1	CRT1 (CALRETICULIN 1); calcium ion binding / unfolded protein binding	K.APMIDNPEFKDDPELYVFPK.L	3	2364.15	25.73	3.93377	1	1	0.87	2	4448565	5953789	0.75	0	14N
AT1G56340.1	CRT1 (CALRETICULIN 1); calcium ion binding / unfolded protein binding	K.SGSLFDNVLVSDDPEYAK.K	2	1954.93	80.18	5.47336	1	1	0.94	2	2308720	3387907	0.68	0	14N
AT1G56340.1	CRT1 (CALRETICULIN 1); calcium ion binding / unfolded protein binding	K.YVGVELWQVK.S	2	1219.67	42.51	5.41131	1	1	0.91	2	2330281	3558503	0.65	0	14N
AT1G56340.1	CRT1 (CALRETICULIN 1); calcium ion binding / unfolded protein binding	K.APMIDNPEFKDDPELYVFPK.L	3	2364.15	33.36	3.76458	1	1	0.96	2	6623318	5868203	1.13	0	15N
AT1G56340.1	CRT1 (CALRETICULIN 1); calcium ion binding / unfolded protein binding	K.SGSLFDNVLVSDDPEYAK.K	2	1954.93	96.34	3.98993	1	1	0.95	2	3179829	3160023	1.01	0	15N
AT1G56340.1	CRT1 (CALRETICULIN 1); calcium ion binding / unfolded protein binding	K.QTGSLYSDWDLLPAKK.I	3	1820.95	21.33	8.18259	1	1	0.92	2	4533977	3724446	1.22	0	15N
AT1G56340.1	CRT1 (CALRETICULIN 1); calcium ion binding / unfolded protein binding	K.YVGVELWQVK.S	2	1219.68	37.68	6.72314	1	1	0.96	2	3692577	3135454	1.18	0	15N
AT1G56410.1	ERD2 (EARLY-RESPONSIVE TO DEHYDRATION 2); ATP binding	R.TTPSYVAFTDSER.L	2	1472.69	104.33	3.59887	3	3	0.95	6	24839358	32693303	0.76	0	14N
AT1G56410.1	ERD2 (EARLY-RESPONSIVE TO DEHYDRATION 2); ATP binding	R.MVNHFVQEFK.R	3	1277.64	24.01	5.08754	1	1	0.98	6	33360760	35709698	0.93	0	14N
AT1G56410.1	ERD2 (EARLY-RESPONSIVE TO DEHYDRATION 2); ATP binding	K.NQVAMNPVNTVFDAK.R	2	1646.83	62.44	8.98704	2	2	0.94	4	16394168	22010992	0.74	0	14N
AT1G56410.1	ERD2 (EARLY-RESPONSIVE TO DEHYDRATION 2); ATP binding	R.MVNHFVQEFK.R	2	1277.63	40.33	1.09578	4	4	0.94	6	4533866	3658617	1.215	0.0288675	15N
AT1G56410.1	ERD2 (EARLY-RESPONSIVE TO DEHYDRATION 2); ATP binding	K.NQVAMNPVNTVFDAK.R	2	1646.82	88.61	4.12918	3	3	1	4	25443796	22596320	1.13	0	15N
AT1G56410.1	ERD2 (EARLY-RESPONSIVE TO DEHYDRATION 2); ATP binding	K.SINPDEAVAYGAAVQAAILSGEGNEK.V	3	2573.28	32.56	6.21777	1	1	0.92	4	4240943	3646294	1.16	0	15N
AT1G56410.1	ERD2 (EARLY-RESPONSIVE TO DEHYDRATION 2); ATP binding	K.VQQLLQDFFNGK.E	2	1435.76	43.69	3.55214	1	1	0.96	5	39306354	17830430	2.2	0	15N
AT1G56410.1	ERD2 (EARLY-RESPONSIVE TO DEHYDRATION 2); ATP binding	R.VEIIANDQGNR.T	2	1227.63	35.56	4.15435	1	1	0.92	10	419409	1911667	0.22	0	15N
AT1G56410.1	ERD2 (EARLY-RESPONSIVE TO DEHYDRATION 2); ATP binding	R.TTPSYVAFTDSER.L	2	1472.69	105.65	3.19145	4	4	0.99	6	27210934	24853807	1.0925	0.005	15N
AT1G56450.1	PBG1; peptidase/ threonine-type endopeptidase	K.ITEEGVTVSQPYSLK.T	2	1649.87	44.29	4.42462	1	1	0.93	1	1309116	1521545	0.86	0	14N
AT1G56450.1	PBG1; peptidase/ threonine-type endopeptidase	K.TYWEFSSFHNPTAGAAGSW.-	2	2114.93	46.1	5.05929	1	1	0.94	1	1806811	1480416	1.22	0	15N
AT1G56450.1	PBG1; peptidase/ threonine-type endopeptidase	K.FNPLWNTLVLGGVK.N	2	1556.89	42.65	5.52387	1	1	0.76	1	1569200	2636097	0.6	0	15N
AT1G56450.1	PBG1; peptidase/ threonine-type endopeptidase	K.ITEEGVTVSQPYSLK.T	2	1649.87	43.71	6.36418	1	1	0.95	1	1328098	1381141	0.96	0	15N
AT1G57720.1	elongation factor 1B-gamma, putative / eEF-1B gamma, putative	K.KAAPVAEAPKPAEEEEAPKPK.A	4	2186.17	43.72	3.20195	1	1	0.99	1	2165419	3355420	0.65	0	14N
AT1G57720.1	elongation factor 1B-gamma, putative / eEF-1B gamma, putative	K.VPVLETPEGPIFESNAIAR.Y	2	2038.09	67.17	4.85751	1	1	0.9	1	4434864	5814592	0.76	0	14N
AT1G57720.1	elongation factor 1B-gamma, putative / eEF-1B gamma, putative	K.QTEAVPPVPTK.K	2	1165.65	24.02	4.28948	1	1	0.88	1	1290202	1027187	1.26	0	15N
AT1G57720.1	elongation factor 1B-gamma, putative / eEF-1B gamma, putative	K.KAAPVAEAPKPAEEEEAPKPK.A	4	2186.17	23.53	2.65305	1	1	1	1	2927855	2686396	1.09	0	15N
AT1G57720.1	elongation factor 1B-gamma, putative / eEF-1B gamma, putative	K.ALIAAEYAGVK.I	2	1104.63	56.49	5.79382	1	1	0.9	1	3029762	3744566	0.81	0	15N
AT1G57720.1	elongation factor 1B-gamma, putative / eEF-1B gamma, putative	K.AAPVAEAPKPAEEEEAPKPK.A	3	2058.08	23.32	4.81033	1	1	0.99	1	381313	335406	1.14	0	15N
AT1G57720.1	elongation factor 1B-gamma, putative / eEF-1B gamma, putative	K.VPVLETPEGPIFESNAIAR.Y	2	2038.09	71.01	5.49536	1	1	0.91	1	8278005	7333101	1.13	0	15N
AT1G57720.1	elongation factor 1B-gamma, putative / eEF-1B gamma, putative	K.KFTSAFPHVER.Y	3	1317.7	31.13	10.4729	1	1	0.97	1	2057511	1623156	1.27	0	15N
AT1G57720.1	elongation factor 1B-gamma, putative / eEF-1B gamma, putative	R.MGYAPFSAPAEEAAISALKR.G	3	2079.07	22.72	8.85018	2	2	0.94	1	15966222	12337778	1.29	0	15N
AT1G58220.1	myb family transcription factor	K.TAVAASLPR.S	2	884.522	28.9	6.67032	3	3	0.99	1	45147775	908987	49.67	1.16801e-06	14N
AT1G58220.1	myb family transcription factor	K.TAVAASLPR.S	2	884.521	25.76	5.87892	1	1	0.97	1	15732920	361157	43.56	0	15N
AT1G58270.1	ZW9	R.FLDSYTSDSFSSGGR.N	2	1624.72	65.32	5.60101	1	1	0.87	1	3327031	489407	6.8	0	14N
AT1G58270.1	ZW9	R.VIDQIQSNNFEK.K	2	1433.73	39.47	4.11516	1	1	0.85	1	2890848	937380	3.08	0	14N
AT1G58983.1	40S ribosomal protein S2, putative	K.TYGFLTPEFWK.E	2	1387.7	40.67	7.13416	2	2	0.86	4	8050682	9465545	0.85	0	14N
AT1G58983.1	40S ribosomal protein S2, putative	K.KVLQFAGIDDVFTSSR.G	3	1781.95	22.64	5.38739	1	1	0.91	4	4450306	5380220	0.83	0	14N
AT1G58983.1	40S ribosomal protein S2, putative	K.VLQFAGIDDVFTSSR.G	2	1653.85	77.46	1.2093	1	1	0.63	4	6293657	4238217	1.48	0	14N
AT1G58983.1	40S ribosomal protein S2, putative	K.VLQ*FAGIDDVFTSSR.G	2	1656.83	24.51	-0.911998	1	1	0.9	4	4856521	1289441	3.77	0	14N
AT1G58983.1	40S ribosomal protein S2, putative	K.EYQIIDHLVGPTLKDEVMK.I	3	2227.16	34.45	-1.70621	1	1	0.94	2	2884182	4720813	0.61	0	15N
AT1G58983.1	40S ribosomal protein S2, putative	K.KVLQFAGIDDVFTSSR.G	3	1781.95	25.95	6.95871	1	1	0.93	4	4116676	3696426	1.11	0	15N
AT1G58983.1	40S ribosomal protein S2, putative	K.VLQFAGIDDVFTSSR.G	2	1653.85	54.79	3.93024	2	2	0.93	4	8894030	4890211	1.82	0	15N
AT1G58983.1	40S ribosomal protein S2, putative	K.TYGFLTPEFWK.E	2	1387.7	38.82	7.20623	2	2	0.92	4	10363203	8078524	1.28	0	15N
AT1G59870.1	PEN3 (PENETRATION 3); ATPase, coupled to transmembrane movement of substances / cadmium ion transmembrane transporter	K.YNPATWMLEASSLAAELK.L	2	1994	58.06	4.76432	1	1	0.82	2	1224211	1549120	0.79	0	15N
AT1G59900.1	AT-E1 ALPHA; oxidoreductase, acting on the aldehyde or oxo group of donors, disulfide as acceptor / pyruvate dehydrogenase (acetyl-transferring)	R.YHGHSMSDPGSTYR.T	3	1593.68	23.98	4.76886	1	1	0.89	2	1223298	1607604	0.76	0	14N
AT1G59900.1	AT-E1 ALPHA; oxidoreductase, acting on the aldehyde or oxo group of donors, disulfide as acceptor / pyruvate dehydrogenase (acetyl-transferring)	R.YHGHSMSDPGSTYR.T	3	1593.68	30.42	4.89436	1	1	0.97	2	1564185	1142090	1.37	0	15N
AT1G60810.1	ACLA-2; ATP citrate synthase	R.VVIDCATANPDGK.S	2	1358.66	39.99	2.79688	1	1	0.94	2	242042	302924	0.8	0	14N
AT1G60810.1	ACLA-2; ATP citrate synthase	R.VVIDCATANPDGK.S	2	1358.66	58.84	1.17763	1	1	0.87	2	220454	211451	1.04	0	15N
AT1G60810.1	ACLA-2; ATP citrate synthase	K.GPITTFIVEPFVPHN*EEFYLN*IVSDR.L	3	3034.53	20.29	7.08518	1	1	0.93	1	2399413	2699332	0.89	0	15N
AT1G61580.1	RPL3B (R-PROTEIN L3 B); structural constituent of ribosome	R.KVACIGAWHPAR.V	3	1364.72	29.79	1.31895	1	1	0.83	3	1152048	1918844	0.6	0	14N
AT1G61580.1	RPL3B (R-PROTEIN L3 B); structural constituent of ribosome	K.DEMIDIIGVTK.G	2	1232.64	28.44	2.10929	1	1	0.75	3	3367000	1219797	2.76	0	15N
AT1G61580.1	RPL3B (R-PROTEIN L3 B); structural constituent of ribosome	R.KVACIGAWHPAR.V	3	1364.73	36.49	5.49563	1	1	0.96	3	811953	706170	1.15	0	15N
AT1G61580.1	RPL3B (R-PROTEIN L3 B); structural constituent of ribosome	R.HGSLGFLPR.K	2	982.546	34.03	3.25686	1	1	0.82	2	7346666	3011065	2.44	0	15N
AT1G62020.1	coatomer protein complex, subunit alpha, putative	R.GWSESSSPNVR.S	2	1204.55	29.2	-0.747164	1	1	0.93	2	467099	460628	1.01	0	14N
AT1G62020.1	coatomer protein complex, subunit alpha, putative	R.GWSESSSPNVR.S	2	1204.56	32.41	3.48676	1	1	0.93	2	690346	469045	1.47	0	15N
AT1G62480.1	vacuolar calcium-binding protein-related	K.AVESEEVTTVSESLPAPVTESQAPVEVTTK.D	3	3113.56	34.43	0.12847	1	1	0.97	1	4407078	3833070	1.15	0	14N
AT1G62480.1	vacuolar calcium-binding protein-related	K.AVESEEVTTVSESLPAPVTESQAPVEVTTK.D	3	3113.57	36.51	4.36799	1	1	0.97	1	5285590	7266528	0.73	0	15N
AT1G62660.1	beta-fructosidase (BFRUCT3) / beta-fructofuranosidase / invertase, vacuolar	R.TGISLIYDTTDFK.T	2	1472.76	59.32	5.49992	1	1	0.93	1	7383977	7404810	1	0	14N
AT1G62660.1	beta-fructosidase (BFRUCT3) / beta-fructofuranosidase / invertase, vacuolar	K.TQLNGLDTSVNGPDVK.H	2	1656.84	57.97	-0.905338	1	1	0.94	1	2812616	295236	9.53	0	14N
AT1G62660.1	beta-fructosidase (BFRUCT3) / beta-fructofuranosidase / invertase, vacuolar	K.FSGNPVLVPPPGIGAK.D	2	1548.88	27.79	4.00291	1	1	0.94	1	7032166	7303627	0.96	0	14N
AT1G62660.1	beta-fructosidase (BFRUCT3) / beta-fructofuranosidase / invertase, vacuolar	K.LNTVFCTDTSR.S	2	1312.62	66.42	3.88537	1	1	0.92	1	5218544	4899736	1.07	0	14N
AT1G62660.1	beta-fructosidase (BFRUCT3) / beta-fructofuranosidase / invertase, vacuolar	R.ILVDHSIVEGFAQGGR.S	3	1696.91	32.22	6.30563	2	2	0.95	1	11914589	13026566	0.915	0.00707107	14N
AT1G62660.1	beta-fructosidase (BFRUCT3) / beta-fructofuranosidase / invertase, vacuolar	K.NLVQWPVEEIK.S	2	1353.75	39.23	7.38696	2	2	0.97	2	13371301	11592508	1.15	0	14N
AT1G62660.1	beta-fructosidase (BFRUCT3) / beta-fructofuranosidase / invertase, vacuolar	R.TGISLIYDTTDFK.T	2	1472.76	59.77	5.29622	1	1	0.97	1	9674908	12346933	0.78	0	15N
AT1G62660.1	beta-fructosidase (BFRUCT3) / beta-fructofuranosidase / invertase, vacuolar	R.TAFHFQPEK.N	2	1103.55	25.67	3.26221	1	1	0.95	1	582329	708399	0.82	0	15N
AT1G62660.1	beta-fructosidase (BFRUCT3) / beta-fructofuranosidase / invertase, vacuolar	K.FSGNPVLVPPPGIGAK.D	2	1548.88	37.56	2.90534	2	2	0.93	1	6729349	8143729	0.83	0	15N
AT1G62660.1	beta-fructosidase (BFRUCT3) / beta-fructofuranosidase / invertase, vacuolar	K.LNTVFCTDTSR.S	2	1312.62	54.25	5.33286	1	1	0.98	1	4994721	5833119	0.86	0	15N
AT1G62660.1	beta-fructosidase (BFRUCT3) / beta-fructofuranosidase / invertase, vacuolar	K.HETLLHQVPNTGMWECVDFYPVSK.T	4	2887.38	24.07	7.15276	1	1	0.9	1	2619273	2986407	0.88	0	15N
AT1G62660.1	beta-fructosidase (BFRUCT3) / beta-fructofuranosidase / invertase, vacuolar	R.STLANDVVKPIYGSFVPVLK.G	3	2146.22	21.95	5.82422	1	1	0.96	1	9503400	13655048	0.7	0	15N
AT1G62660.1	beta-fructosidase (BFRUCT3) / beta-fructofuranosidase / invertase, vacuolar	R.ILVDHSIVEGFAQGGR.S	3	1696.91	32.07	6.12883	1	1	0.9	1	11721808	16138518	0.73	0	15N
AT1G62660.1	beta-fructosidase (BFRUCT3) / beta-fructofuranosidase / invertase, vacuolar	K.NLVQWPVEEIK.S	2	1353.74	43.66	5.39248	2	2	0.96	2	11750077	14165184	0.83	0	15N
AT1G63000.1	NRS/ER (NUCLEOTIDE-RHAMNOSE SYNTHASE/EPIMERASE-REDUCTASE); UDP-4-keto-6-deoxy-glucose-3,5-epimerase/ UDP-4-keto-rhamnose-4-keto-reductase/ dTDP-4-dehydrorhamnose 3,5-epimerase/ dTDP-4-dehydrorhamnose reductase	K.LKTEFPELMSIK.E	3	1434.8	32.79	6.62119	1	1	0.9	1	3367562	4199038	0.8	0	14N
AT1G63000.1	NRS/ER (NUCLEOTIDE-RHAMNOSE SYNTHASE/EPIMERASE-REDUCTASE); UDP-4-keto-6-deoxy-glucose-3,5-epimerase/ UDP-4-keto-rhamnose-4-keto-reductase/ dTDP-4-dehydrorhamnose 3,5-epimerase/ dTDP-4-dehydrorhamnose reductase	K.VVDIPNSMTILDELLPISIEMAK.R	2	2540.37	34.01	5.43231	2	2	0.83	1	5367053	7997679	0.705	0.0494975	14N
AT1G63000.1	NRS/ER (NUCLEOTIDE-RHAMNOSE SYNTHASE/EPIMERASE-REDUCTASE); UDP-4-keto-6-deoxy-glucose-3,5-epimerase/ UDP-4-keto-rhamnose-4-keto-reductase/ dTDP-4-dehydrorhamnose 3,5-epimerase/ dTDP-4-dehydrorhamnose reductase	R.NLTGIYNFTN*PGVVSHNEILEMYR.D	3	2781.38	33.44	8.98844	1	1	0.81	1	6080636	10058040	0.6	0	14N
AT1G63000.1	NRS/ER (NUCLEOTIDE-RHAMNOSE SYNTHASE/EPIMERASE-REDUCTASE); UDP-4-keto-6-deoxy-glucose-3,5-epimerase/ UDP-4-keto-rhamnose-4-keto-reductase/ dTDP-4-dehydrorhamnose 3,5-epimerase/ dTDP-4-dehydrorhamnose reductase	K.LCEAQGITYTYGSGR.L	2	1674.78	84.29	3.64228	1	1	0.9	1	1629407	292170	5.58	0	14N
AT1G63000.1	NRS/ER (NUCLEOTIDE-RHAMNOSE SYNTHASE/EPIMERASE-REDUCTASE); UDP-4-keto-6-deoxy-glucose-3,5-epimerase/ UDP-4-keto-rhamnose-4-keto-reductase/ dTDP-4-dehydrorhamnose 3,5-epimerase/ dTDP-4-dehydrorhamnose reductase	R.MPISSDLTNPR.N	2	1229.62	48.09	4.14764	1	1	0.91	1	4307200	4311508	1	0	14N
AT1G63000.1	NRS/ER (NUCLEOTIDE-RHAMNOSE SYNTHASE/EPIMERASE-REDUCTASE); UDP-4-keto-6-deoxy-glucose-3,5-epimerase/ UDP-4-keto-rhamnose-4-keto-reductase/ dTDP-4-dehydrorhamnose 3,5-epimerase/ dTDP-4-dehydrorhamnose reductase	R.TNVAGTLTLADICR.E	2	1503.79	51.57	9.24338	1	1	0.95	1	2221534	2906420	0.76	0	14N
AT1G63000.1	NRS/ER (NUCLEOTIDE-RHAMNOSE SYNTHASE/EPIMERASE-REDUCTASE); UDP-4-keto-6-deoxy-glucose-3,5-epimerase/ UDP-4-keto-rhamnose-4-keto-reductase/ dTDP-4-dehydrorhamnose 3,5-epimerase/ dTDP-4-dehydrorhamnose reductase	R.NLTGIYNFTNPGVVSHNEILEMYR.D	3	2780.39	22.75	6.83363	1	1	0.82	1	12492303	11747259	1.06	0	15N
AT1G63000.1	NRS/ER (NUCLEOTIDE-RHAMNOSE SYNTHASE/EPIMERASE-REDUCTASE); UDP-4-keto-6-deoxy-glucose-3,5-epimerase/ UDP-4-keto-rhamnose-4-keto-reductase/ dTDP-4-dehydrorhamnose 3,5-epimerase/ dTDP-4-dehydrorhamnose reductase	R.TNVAGTLTLADICR.E	2	1503.79	63.07	7.7139	1	1	0.67	1	3280298	3368026	0.97	0	15N
AT1G63000.1	NRS/ER (NUCLEOTIDE-RHAMNOSE SYNTHASE/EPIMERASE-REDUCTASE); UDP-4-keto-6-deoxy-glucose-3,5-epimerase/ UDP-4-keto-rhamnose-4-keto-reductase/ dTDP-4-dehydrorhamnose 3,5-epimerase/ dTDP-4-dehydrorhamnose reductase	K.LKTEFPELMSIK.E	3	1434.8	31.65	8.43331	1	1	0.91	1	3974118	3363267	1.18	0	15N
AT1G63000.1	NRS/ER (NUCLEOTIDE-RHAMNOSE SYNTHASE/EPIMERASE-REDUCTASE); UDP-4-keto-6-deoxy-glucose-3,5-epimerase/ UDP-4-keto-rhamnose-4-keto-reductase/ dTDP-4-dehydrorhamnose 3,5-epimerase/ dTDP-4-dehydrorhamnose reductase	K.VVDIPNSMTILDELLPISIEMAK.R	2	2540.36	54.57	3.50345	4	4	0.92	1	4596437	4829433	0.965	0.01	15N
AT1G63000.1	NRS/ER (NUCLEOTIDE-RHAMNOSE SYNTHASE/EPIMERASE-REDUCTASE); UDP-4-keto-6-deoxy-glucose-3,5-epimerase/ UDP-4-keto-rhamnose-4-keto-reductase/ dTDP-4-dehydrorhamnose 3,5-epimerase/ dTDP-4-dehydrorhamnose reductase	R.MPISSDLTNPR.N	2	1229.62	50.54	5.28621	1	1	0.95	1	8275030	4073451	2.03	0	15N
AT1G63500.1	ATP binding / binding / protein kinase/ protein serine/threonine kinase/ protein tyrosine kinase	R.VTPESVMYSYGTLLLDLLSGK.H	3	2285.21	28.58	5.60127	1	1	0.92	1	485657	392574	1.24	0	15N
AT1G63770.2	peptidase M1 family protein	K.NTALAYLASLEDPAYMELALNEYK.M	2	2702.33	39.24	4.21859	1	1	0.92	4	1218055	570674	2.13	0	15N
AT1G63770.2	peptidase M1 family protein	K.LLDHPAFDLR.N	3	1195.65	20.41	5.10186	1	1	0.89	4	1295917	919930	1.41	0	15N
AT1G63770.2	peptidase M1 family protein	K.AITLPGEGEIMDMMAVADPDAVHAVR.K	3	2709.32	21.2	2.82295	1	1	0.91	4	2810908	2258689	1.24	0	15N
AT1G63940.1	monodehydroascorbate reductase, putative	K.GIEVIYEDPVAGADFEK.Q	2	1850.91	79.09	4.53833	1	1	0.6	4	2531637	5767063	0.44	0	14N
AT1G63940.1	monodehydroascorbate reductase, putative	K.IATFWIESGR.L	2	1178.62	32.07	4.4968	1	1	0.94	3	3227668	3018351	1.07	0	14N
AT1G63940.1	monodehydroascorbate reductase, putative	K.LASASSVEEALEIAQAALQS.-	3	1987.04	25.73	8.45488	1	1	0.91	3	9544887	8258554	1.16	0	14N
AT1G63940.1	monodehydroascorbate reductase, putative	R.EVADADSLIASLGK.A	2	1387.74	39.44	9.29577	1	1	0.95	4	2221799	2781637	0.8	0	14N
AT1G63940.1	monodehydroascorbate reductase, putative	K.LADGSTIEADTVVIGIGAKPAIGPFETLAMN*K.S	3	3200.72	31.73	11.3278	1	1	0.91	4	2107191	3066860	0.69	0	14N
AT1G63940.1	monodehydroascorbate reductase, putative	R.TFVENGMADGR.L	2	1195.54	57.91	1.92382	1	1	0.92	4	1219205	1079955	1.13	0	14N
AT1G63940.1	monodehydroascorbate reductase, putative	R.VFEYEGSPR.K	2	1082.51	34.22	0.369511	1	1	0.88	4	1752675	1784207	0.98	0	14N
AT1G63940.1	monodehydroascorbate reductase, putative	R.TSTPGIFAIGDVAAFPLK.I	2	1804.01	59.43	12.0289	2	2	0.75	4	7401457	171419183	0.025	0.0212132	14N
AT1G63940.1	monodehydroascorbate reductase, putative	K.GASINNLEAGSDGR.V	2	1359.65	61.15	3.08904	1	1	0.93	4	1826785	1954845	0.93	0	14N
AT1G63940.1	monodehydroascorbate reductase, putative	K.GIEVIYEDPVAGADFEK.Q	2	1850.91	68.53	5.83499	1	1	0.89	4	3750376	4268918	0.88	0	15N
AT1G63940.1	monodehydroascorbate reductase, putative	K.YGSLIIATGCTASR.F	2	1468.75	46.62	4.97024	1	1	0.59	4	2053075	2686611	0.76	0	15N
AT1G63940.1	monodehydroascorbate reductase, putative	R.TFVENGMADGR.L	2	1195.54	41.7	5.18595	1	1	0.91	4	1533562	834035	1.84	0	15N
AT1G63940.1	monodehydroascorbate reductase, putative	R.LKGVLVESGSPEEFQLLPK.L	3	2069.16	30.39	6.28278	1	1	0.98	3	2366350	2348179	1.01	0	15N
AT1G63940.1	monodehydroascorbate reductase, putative	R.TSTPGIFAIGDVAAFPLK.I	2	1804	65.59	6.37478	2	2	0.85	4	10524545	178113184	0.06	0	15N
AT1G63940.1	monodehydroascorbate reductase, putative	K.GVLVESGSPEEFQLLPK.L	2	1827.98	49.26	3.55586	1	1	0.95	3	4144142	3277371	1.26	0	15N
AT1G63940.1	monodehydroascorbate reductase, putative	K.IATFWIESGR.L	2	1178.62	41.94	4.83618	1	1	0.71	3	7536871	5122841	1.47	0	15N
AT1G63940.1	monodehydroascorbate reductase, putative	K.LASASSVEEALEIAQAALQS.-	2	1987.03	43.8	5.53593	3	3	0.97	3	3915355	2997737	1.49667	0.161658	15N
AT1G63940.1	monodehydroascorbate reductase, putative	R.LPGFHTCVGGGGER.Q	3	1442.68	20.55	2.28741	1	1	0.97	4	3202965	1744870	1.84	0	15N
AT1G63940.1	monodehydroascorbate reductase, putative	R.VFEYEGSPR.K	2	1082.51	45.24	3.23322	1	1	0.95	4	2240244	1382094	1.62	0	15N
AT1G63940.1	monodehydroascorbate reductase, putative	K.GASINNLEAGSDGR.V	2	1359.65	54.45	1.91226	1	1	0.98	4	2881860	1619368	1.78	0	15N
AT1G64090.1	reticulon family protein (RTNLB3)	K.LFGGGKPADIFLWR.N	3	1575.87	21.92	6.59955	1	1	0.87	1	1802536	2881591	0.63	0	15N
AT1G64190.1	6-phosphogluconate dehydrogenase family protein	R.LPANLVQAQR.D	2	1108.65	83.28	2.34521	1	1	0.96	3	3952176	3925754	1.01	0	14N
AT1G64190.1	6-phosphogluconate dehydrogenase family protein	K.VAAQVEDGPCVTYIGEGGSGNFVK.M	2	2453.17	52.44	1.83437	2	2	0.95	2	2475247	2923274	0.845	0.00707107	14N
AT1G64190.1	6-phosphogluconate dehydrogenase family protein	R.ARLPAN*LVQAQR.D	3	1336.79	26.65	15.4851	1	1	0.84	2	555840	1533347	0.36	0	14N
AT1G64190.1	6-phosphogluconate dehydrogenase family protein	R.AAVEGNLPVSGQYSPR.D	2	1643.84	73.96	1.21667	1	1	0.97	1	1393682	1533094	0.91	0	14N
AT1G64190.1	6-phosphogluconate dehydrogenase family protein	R.NPDLASLVVDPEFAK.E	2	1613.84	49.48	2.85035	1	1	0.89	1	1989364	2545241	0.78	0	14N
AT1G64190.1	6-phosphogluconate dehydrogenase family protein	K.NVGGLSNEELAEIFTEWNSGELESFLVEITSDIFR.V	3	3943.93	29.48	5.50216	1	1	0.86	1	1648963	1271911	1.3	0	15N
AT1G64190.1	6-phosphogluconate dehydrogenase family protein	K.VAAQVEDGPCVTYIGEGGSGNFVK.M	2	2453.17	58.06	5.21776	2	2	0.98	2	3978050	2973859	1.45	0.155563	15N
AT1G64190.1	6-phosphogluconate dehydrogenase family protein	K.SWNLNFGELAR.I	2	1305.66	35.51	5.05494	1	1	0.95	1	2182396	1353202	1.61	0	15N
AT1G64190.1	6-phosphogluconate dehydrogenase family protein	R.NPDLASLVVDPEFAK.E	2	1613.85	52.93	5.08106	1	1	0.94	1	2717023	2172953	1.25	0	15N
AT1G64190.1	6-phosphogluconate dehydrogenase family protein	R.LPANLVQAQR.D	2	1108.65	57.02	5.05122	2	2	0.98	3	8123584	4907828	1.66	0	15N
AT1G64190.1	6-phosphogluconate dehydrogenase family protein	R.VKDEFGDGELVDK.I	3	1449.72	38.44	5.93223	1	1	0.56	1	2819476	2867301	0.98	0	15N
AT1G64190.1	6-phosphogluconate dehydrogenase family protein	R.IGLAGLAVMGQNLALNIAEK.G	3	1995.14	51.42	8.32027	2	2	0.88	2	1359045	1886010	0.725	0.00707107	15N
AT1G64190.1	6-phosphogluconate dehydrogenase family protein	K.MVHNGIEYGDMQLISEAYDVLK.N	3	2524.22	40.81	4.51627	1	1	0.87	2	11213795	7215382	1.55	0	15N
AT1G64190.1	6-phosphogluconate dehydrogenase family protein	K.GFPISVYNR.T	2	1051.56	26.26	7.22741	1	1	0.97	3	9565268	6765074	1.41	0	15N
AT1G64190.1	6-phosphogluconate dehydrogenase family protein	R.DLFGAHTYER.T	2	1207.57	37.81	2.64995	1	1	0.47	2	2805536	948142	2.96	0	15N
AT1G64190.1	6-phosphogluconate dehydrogenase family protein	R.AAVEGNLPVSGQYSPR.D	2	1643.84	58.35	2.31167	1	1	0.96	1	2333255	1662672	1.4	0	15N
AT1G64200.1	VHA-E3 (VACUOLAR H+-ATPASE SUBUNIT E ISOFORM 3); proton-transporting ATPase, rotational mechanism	K.DLIVQCLLR.L	2	1128.65	24.04	8.24	1	1	0.88	2	4145223	5151771	0.8	0	14N
AT1G64200.1	VHA-E3 (VACUOLAR H+-ATPASE SUBUNIT E ISOFORM 3); proton-transporting ATPase, rotational mechanism	K.IVCENTLDAR.L	2	1189.59	45.75	7.81786	1	1	0.99	3	3137533	4231316	0.74	0	14N
AT1G64200.1	VHA-E3 (VACUOLAR H+-ATPASE SUBUNIT E ISOFORM 3); proton-transporting ATPase, rotational mechanism	K.IVCENTLDAR.L	2	1189.59	60.99	4.5394	1	1	0.94	3	3703621	3196442	1.16	0	15N
AT1G64200.1	VHA-E3 (VACUOLAR H+-ATPASE SUBUNIT E ISOFORM 3); proton-transporting ATPase, rotational mechanism	K.VLQAQDDIVNAMK.E	2	1443.76	38.93	7.41127	1	1	0.93	2	3746546	4360141	0.86	0	15N
AT1G64200.1	VHA-E3 (VACUOLAR H+-ATPASE SUBUNIT E ISOFORM 3); proton-transporting ATPase, rotational mechanism	K.DLIVQCLLR.L	2	1128.65	30.16	7.17678	1	1	0.92	2	3915322	3455551	1.13	0	15N
AT1G64230.1	ubiquitin-conjugating enzyme, putative	K.VLLSICSLLTDPNPDDPLVPEIAHMYK.T	3	3049.58	70.3	6.55833	2	2	0.85	9	9841157	14176848	0.69	0	14N
AT1G64230.1	ubiquitin-conjugating enzyme, putative	K.VLLSICSLLTDPNPDDPLVPEIAHMYK.T	3	3049.57	47.66	3.935	2	2	0.92	9	10284214	9159698	1.12	0	15N
AT1G64230.1	ubiquitin-conjugating enzyme, putative	K.EQWSPALTISK.V	2	1258.66	37.91	-1.35064	1	1	0.91	11	9444172	2848620	3.32	0	15N
AT1G64520.1	RPN12a (Regulatory Particle non-ATPase 12a); peptidase	K.EIPSLQLINQTLSYAR.E	2	1845	38.36	-2.81842	1	1	0.62	1	1256537	2553847	0.49	0	14N
AT1G64520.1	RPN12a (Regulatory Particle non-ATPase 12a); peptidase	R.NRIPQSPQENLILGLNLLR.L	3	2187.27	27.03	4.06902	1	1	0.32	1	2002065	3969836	0.5	0	15N
AT1G65930.1	isocitrate dehydrogenase, putative / NADP+ isocitrate dehydrogenase, putative	R.FKDIFQEVYEASWK.S	3	1788.89	41.18	3.68946	3	3	0.9	1	7903919	8254493	0.953333	0.0057735	14N
AT1G65930.1	isocitrate dehydrogenase, putative / NADP+ isocitrate dehydrogenase, putative	K.DLALIIHGSK.L	2	1065.63	31.71	3.8475	2	2	0.84	1	9641879	12933890	0.75	0	14N
AT1G65930.1	isocitrate dehydrogenase, putative / NADP+ isocitrate dehydrogenase, putative	R.LIDDMVAYALK.S	2	1250.68	67.86	7.43604	2	2	0.96	1	17584743	21075184	0.83	0	14N
AT1G65930.1	isocitrate dehydrogenase, putative / NADP+ isocitrate dehydrogenase, putative	R.AFADASMNTAYEK.K	2	1417.63	65.08	2.9627	1	1	0.89	1	5337785	5231749	1.02	0	14N
AT1G65930.1	isocitrate dehydrogenase, putative / NADP+ isocitrate dehydrogenase, putative	R.DTYLNTEEFIDAVAAELKER.L	3	2326.16	33	7.56618	1	1	0.93	1	27211186	31519148	0.86	0	14N
AT1G65930.1	isocitrate dehydrogenase, putative / NADP+ isocitrate dehydrogenase, putative	K.LEAACVGTVESGK.M	2	1319.65	43.61	3.25845	1	1	0.97	1	2303328	1996485	1.15	0	14N
AT1G65930.1	isocitrate dehydrogenase, putative / NADP+ isocitrate dehydrogenase, putative	K.TIEAEAAHGTVTR.H	2	1354.7	81.29	4.28142	4	4	0.96	2	2144681	2427658	0.8575	0.045	14N
AT1G65930.1	isocitrate dehydrogenase, putative / NADP+ isocitrate dehydrogenase, putative	K.VANPIVEMDGDEMTR.V	2	1675.76	78.17	-1.25316	3	3	0.91	1	11442254	12040272	0.95	1.49012e-08	14N
AT1G65930.1	isocitrate dehydrogenase, putative / NADP+ isocitrate dehydrogenase, putative	R.DTYLNTEEFIDAVAAELK.E	2	2041.02	94.28	9.0642	2	2	0.83	1	6047755	6518479	0.93	0	14N
AT1G65930.1	isocitrate dehydrogenase, putative / NADP+ isocitrate dehydrogenase, putative	K.SKYDAAGIWYEHR.L	3	1594.77	47.45	3.32338	1	1	0.83	1	6372391	6665287	0.96	0	14N
AT1G65930.1	isocitrate dehydrogenase, putative / NADP+ isocitrate dehydrogenase, putative	K.SEGGYVWACK.N	2	1155.51	41.45	3.11551	1	1	0.89	3	3331261	3372103	0.99	0	14N
AT1G65930.1	isocitrate dehydrogenase, putative / NADP+ isocitrate dehydrogenase, putative	K.YFDLGLPHR.D	3	1116.59	33.81	7.70209	2	2	0.92	1	14815773	15875875	0.93	0	14N
AT1G65930.1	isocitrate dehydrogenase, putative / NADP+ isocitrate dehydrogenase, putative	K.GGETSTNSIASIFAWTR.G	2	1796.87	57.73	-2.17043	1	1	0.95	1	8979596	9830542	0.91	0	14N
AT1G65930.1	isocitrate dehydrogenase, putative / NADP+ isocitrate dehydrogenase, putative	R.LIDDMVAYALK.S	2	1250.67	37.71	2.39872	2	2	0.97	1	21239214	21627529	0.98	0	15N
AT1G65930.1	isocitrate dehydrogenase, putative / NADP+ isocitrate dehydrogenase, putative	R.AFADASMNTAYEK.K	2	1417.63	70.01	2.75108	1	1	0.91	1	7484119	6549166	1.14	0	15N
AT1G65930.1	isocitrate dehydrogenase, putative / NADP+ isocitrate dehydrogenase, putative	R.DTYLNTEEFIDAVAAELKER.L	3	2326.16	25.35	7.86711	1	1	0.96	1	13266527	13452646	0.99	0	15N
AT1G65930.1	isocitrate dehydrogenase, putative / NADP+ isocitrate dehydrogenase, putative	K.LEAACVGTVESGK.M	2	1319.65	47.99	3.63734	1	1	0.98	1	4498689	4315074	1.04	0	15N
AT1G65930.1	isocitrate dehydrogenase, putative / NADP+ isocitrate dehydrogenase, putative	K.SKYDAAGIWYEHR.L	3	1594.77	25.48	4.82831	1	1	0.84	1	6219348	5349010	1.16	0	15N
AT1G65930.1	isocitrate dehydrogenase, putative / NADP+ isocitrate dehydrogenase, putative	R.FKDIFQEVYEASWK.S	3	1788.89	33.1	5.03108	2	2	0.92	1	10142244	9338121	1.09	0	15N
AT1G65930.1	isocitrate dehydrogenase, putative / NADP+ isocitrate dehydrogenase, putative	K.DLALIIHGSK.L	2	1065.63	42.89	4.87976	2	2	0.9	1	12186993	11728411	1.04	0	15N
AT1G65930.1	isocitrate dehydrogenase, putative / NADP+ isocitrate dehydrogenase, putative	K.YDAAGIWYEHR.L	3	1379.64	22.03	7.97313	1	1	0.82	1	1439142	1148857	1.25	0	15N
AT1G65930.1	isocitrate dehydrogenase, putative / NADP+ isocitrate dehydrogenase, putative	R.DATDDKVTIESAEATK.K	3	1692.82	26.27	3.36718	1	1	0.93	1	1105050	1019204	1.08	0	15N
AT1G65930.1	isocitrate dehydrogenase, putative / NADP+ isocitrate dehydrogenase, putative	K.TIEAEAAHGTVTR.H	2	1354.7	89.13	4.2076	2	2	0.99	2	2630498	2600105	1.01	0	15N
AT1G65930.1	isocitrate dehydrogenase, putative / NADP+ isocitrate dehydrogenase, putative	K.VANPIVEMDGDEMTR.V	2	1675.76	64.58	0.0596743	3	3	0.95	1	16506008	15081526	1.09	0	15N
AT1G65930.1	isocitrate dehydrogenase, putative / NADP+ isocitrate dehydrogenase, putative	R.DTYLNTEEFIDAVAAELK.E	2	2041.01	117.45	6.02647	6	6	0.9	1	13063583	12622592	1.03667	0.010328	15N
AT1G65930.1	isocitrate dehydrogenase, putative / NADP+ isocitrate dehydrogenase, putative	K.YFDLGLPHR.D	3	1116.59	31.31	6.00047	4	4	0.95	1	23502721	23209084	0.8375	0.351698	15N
AT1G65930.1	isocitrate dehydrogenase, putative / NADP+ isocitrate dehydrogenase, putative	K.GGETSTNSIASIFAWTR.G	2	1796.88	70.79	3.39478	2	2	0.94	1	11830252	9770388	1.21	0	15N
AT1G65960.2	GAD2 (GLUTAMATE DECARBOXYLASE 2); calmodulin binding / glutamate decarboxylase	K.NYVDMDEYPVTTELQNR.C	2	2085.95	97.05	5.56104	2	2	0.95	4	6090965	6771629	0.9	0	14N
AT1G65960.2	GAD2 (GLUTAMATE DECARBOXYLASE 2); calmodulin binding / glutamate decarboxylase	K.NYVDMDEYPVTTELQNR.C	2	2085.94	96.65	-1.77378	2	2	0.96	4	9323385	6332214	1.47	0	15N
AT1G65960.2	GAD2 (GLUTAMATE DECARBOXYLASE 2); calmodulin binding / glutamate decarboxylase	R.LNLASFVTTWMEPECDK.L	2	2039.95	44.34	2.7942	1	1	0.96	5	2369002	1847600	1.28	0	15N
AT1G65980.1	TPX1 (thioredoxin-dependent peroxidase 1); antioxidant/ oxidoreductase	K.VILFGVPGAFTPTCSMK.H	2	1823.95	26.05	5.70194	1	1	0.92	2	8039831	10188982	0.79	0	15N
AT1G65980.1	TPX1 (thioredoxin-dependent peroxidase 1); antioxidant/ oxidoreductase	M.APIAVGDVVPDGTISFFDENDQLQ*TASVHSLAAGK.K	3	3569.78	40.47	5.85473	1	1	0.82	2	3299331	4250296	0.78	0	15N
AT1G66200.1	ATGSR2; copper ion binding / glutamate-ammonia ligase	R.GNNILVMCDAYTPAGEPIPTNKR.H	3	2530.25	51.63	5.05881	2	2	0.97	4	13471947	20612471	0.65	0	14N
AT1G66200.1	ATGSR2; copper ion binding / glutamate-ammonia ligase	K.DVNWPLGWPIGGFPGPQGPYYCSIGADK.S	3	3047.45	38.57	5.2175	1	1	0.91	2	14421516	22574114	0.64	0	14N
AT1G66200.1	ATGSR2; copper ion binding / glutamate-ammonia ligase	R.TLPGPVTDPSKLPK.W	2	1448.84	39.89	3.52008	1	1	0.94	3	2946936	3920251	0.75	0	14N
AT1G66200.1	ATGSR2; copper ion binding / glutamate-ammonia ligase	K.WNYDGSSTGQAPGQDSEVILYPQ*AIFKDPFR.R	3	3487.67	74.63	5.17558	1	1	0.95	2	5553823	9068054	0.61	0	14N
AT1G66200.1	ATGSR2; copper ion binding / glutamate-ammonia ligase	K.WNYDGSSTGQAPGQDSEVILYPQAIFKDPFR.R	3	3485.68	59.82	4.99188	1	1	0.96	2	8118978	10482750	0.77	0	14N
AT1G66200.1	ATGSR2; copper ion binding / glutamate-ammonia ligase	R.HAAAEIFANPDVIAEVPWYGIEQEYTLLQK.D	3	3414.74	72.61	6.20841	6	6	0.88	2	48200437	83763359	0.581667	0.00408248	14N
AT1G66200.1	ATGSR2; copper ion binding / glutamate-ammonia ligase	R.HAAAEIFAN*PDVIAEVPWYGIEQEYTLLQK.D	3	3415.76	34.95	14.8139	1	1	0.82	2	46004457	88564074	0.52	0	14N
AT1G66200.1	ATGSR2; copper ion binding / glutamate-ammonia ligase	R.LTGHHETADINTFLWGVANR.G	4	2251.14	27	8.39582	1	1	0.78	2	5480580	8791748	0.62	0	14N
AT1G66200.1	ATGSR2; copper ion binding / glutamate-ammonia ligase	R.HKEHISAYGEGNER.R	3	1625.77	24.48	2.46038	1	1	0.84	2	270189	352013	0.77	0	14N
AT1G66200.1	ATGSR2; copper ion binding / glutamate-ammonia ligase	K.DVNWPLGWPIGGFPGPQGPYYCSIGADK.S	3	3047.45	42.02	3.77366	2	2	0.91	2	33999056	8987907	3.78	0	15N
AT1G66200.1	ATGSR2; copper ion binding / glutamate-ammonia ligase	R.HAAAEIFANPDVIAEVPWYGIEQEYTLLQK.D	3	3414.73	88.74	3.3092	10	10	0.9	2	119981215	36194384	3.269	0.129653	15N
AT1G66200.1	ATGSR2; copper ion binding / glutamate-ammonia ligase	K.IIAEYIWVGGSGMDMR.S	2	1796.88	70.4	6.73394	1	1	0.33	3	7351241	3760152	1.96	0	15N
AT1G66200.1	ATGSR2; copper ion binding / glutamate-ammonia ligase	K.SMREEGGYEIIK.K	3	1410.7	38.8	4.4659	1	1	0.75	2	2983318	898755	3.32	0	15N
AT1G66200.1	ATGSR2; copper ion binding / glutamate-ammonia ligase	R.HKEHISAYGEGNER.R	3	1625.77	33.29	4.73624	1	1	0.89	2	347925	109233	3.19	0	15N
AT1G66200.1	ATGSR2; copper ion binding / glutamate-ammonia ligase	R.GNNILVMCDAYTPAGEPIPTNKR.H	3	2530.25	39.74	5.49355	2	2	0.98	4	30265675	8870353	3.41	0	15N
AT1G66200.1	ATGSR2; copper ion binding / glutamate-ammonia ligase	R.TLPGPVTDPSK.L	2	1110.6	25.01	3.6917	1	1	0.97	3	6237094	2102057	2.97	0	15N
AT1G66200.1	ATGSR2; copper ion binding / glutamate-ammonia ligase	R.TLPGPVTDPSKLPK.W	2	1448.83	32.48	1.38042	1	1	0.96	3	5709004	1589848	3.59	0	15N
AT1G66200.1	ATGSR2; copper ion binding / glutamate-ammonia ligase	K.WNYDGSSTGQAPGQDSEVILYPQ*AIFKDPFR.R	3	3486.67	46.79	8.14537	1	1	0.84	2	2414340	1785377	1.35	0	15N
AT1G66200.1	ATGSR2; copper ion binding / glutamate-ammonia ligase	K.WNYDGSSTGQAPGQDSEVILYPQAIFKDPFR.R	3	3485.68	66.52	4.6763	3	3	0.94	2	12458983	4167309	2.99	0	15N
AT1G66200.1	ATGSR2; copper ion binding / glutamate-ammonia ligase	R.LTGHHETADINTFLWGVANR.G	4	2251.14	23.43	6.61892	1	1	0.96	2	17244587	5061265	3.41	0	15N
AT1G66200.1	ATGSR2; copper ion binding / glutamate-ammonia ligase	K.WNYDGSSTGQAPGQDSEVILYPQAIFK.D	3	2970.43	23.49	4.67949	1	1	0.93	2	19782316	5525466	3.58	0	15N
AT1G66240.1	ATX1 (ARABIDOPSIS HOMOLOG OF ANTI-OXIDANT 1); metal ion binding	R.VAMTCEGCVGAVK.R	2	1380.64	58.86	5.43231	1	1	0.93	1	1202348	1327708	0.91	0	14N
AT1G66240.1	ATX1 (ARABIDOPSIS HOMOLOG OF ANTI-OXIDANT 1); metal ion binding	K.GNVQPDAVLQTVTK.T	2	1468.8	36.46	5.31047	1	1	0.94	2	4272870	5542634	0.77	0	14N
AT1G66240.1	ATX1 (ARABIDOPSIS HOMOLOG OF ANTI-OXIDANT 1); metal ion binding	K.TAFWEAEGETAKA.-	2	1409.66	63.72	2.341	1	1	0.94	2	2506643	306804	8.17	0	14N
AT1G66240.1	ATX1 (ARABIDOPSIS HOMOLOG OF ANTI-OXIDANT 1); metal ion binding	K.GNVQPDAVLQTVTK.T	2	1468.8	48.45	3.6084	1	1	0.94	2	6267450	5635242	1.11	0	15N
AT1G66240.1	ATX1 (ARABIDOPSIS HOMOLOG OF ANTI-OXIDANT 1); metal ion binding	R.VAMTCEGCVGAVK.R	2	1380.63	58.04	2.8248	1	1	0.95	1	2060145	1682912	1.22	0	15N
AT1G66270.1	BGLU21; catalytic/ cation binding / hydrolase, hydrolyzing O-glycosyl compounds	R.FGLYYVDFK.N	2	1150.58	69.05	5.99699	7	7	0.87	4	245785311	322837817	0.762857	0.0048795	14N
AT1G66270.1	BGLU21; catalytic/ cation binding / hydrolase, hydrolyzing O-glycosyl compounds	R.GPALWDIYCR.R	2	1249.6	45.31	2.8009	7	7	0.91	3	211750104	278535979	0.765714	0.009759	14N
AT1G66270.1	BGLU21; catalytic/ cation binding / hydrolase, hydrolyzing O-glycosyl compounds	K.GVSQAGVQFYHELIDELLK.N	3	2145.14	24.43	9.27688	1	1	0.98	2	12900353	43861852	0.29	0	14N
AT1G66270.1	BGLU21; catalytic/ cation binding / hydrolase, hydrolyzing O-glycosyl compounds	K.NGIVPFVTVFHWDTPQ*DLEDEYGGFLSQNIVK.D	3	3664.82	26.24	9.71409	1	1	0.88	1	7223380	23223792	0.31	0	14N
AT1G66270.1	BGLU21; catalytic/ cation binding / hydrolase, hydrolyzing O-glycosyl compounds	K.NLNTDAFR.L	2	949.473	31.64	3.68627	1	1	0.96	4	11097024	12164679	0.91	0	14N
AT1G66270.1	BGLU21; catalytic/ cation binding / hydrolase, hydrolyzing O-glycosyl compounds	K.QDSLVSWEPK.N	2	1187.6	28.03	6.82054	1	1	0.96	2	3048252	10361095	0.29	0	14N
AT1G66270.1	BGLU21; catalytic/ cation binding / hydrolase, hydrolyzing O-glycosyl compounds	K.LGTTDSVDVGTADHNR.K	3	1656.78	37.43	2.95755	1	1	0.94	2	393309	872627	0.45	0	14N
AT1G66270.1	BGLU21; catalytic/ cation binding / hydrolase, hydrolyzing O-glycosyl compounds	R.YKEDIQLMK.N	2	1166.61	46.38	3.51446	8	8	0.93	8	67603565	92872960	0.73	0	14N
AT1G66270.1	BGLU21; catalytic/ cation binding / hydrolase, hydrolyzing O-glycosyl compounds	R.EYADYVFTEYGGK.V	2	1540.69	48.99	4.99779	1	1	0.93	3	7474088	20606405	0.36	0	14N
AT1G66270.1	BGLU21; catalytic/ cation binding / hydrolase, hydrolyzing O-glycosyl compounds	R.LPQFTAAQK.A	2	1002.56	25.65	2.49362	1	1	0.98	2	2673408	9023191	0.3	0	14N
AT1G66270.1	BGLU21; catalytic/ cation binding / hydrolase, hydrolyzing O-glycosyl compounds	R.LSIAWSR.I	2	831.471	39.87	3.36754	2	2	0.93	5	13939991	33233296	0.42	0	14N
AT1G66270.1	BGLU21; catalytic/ cation binding / hydrolase, hydrolyzing O-glycosyl compounds	R.GPALWDIYCR.R	2	1249.61	49.48	5.28169	8	8	0.9	3	262354820	263450238	1.005	0.0092582	15N
AT1G66270.1	BGLU21; catalytic/ cation binding / hydrolase, hydrolyzing O-glycosyl compounds	K.GVSQAGVQFYHELIDELLK.N	3	2145.13	38.36	5.96704	5	5	0.86	2	2606787	1951686	1.82	0.268328	15N
AT1G66270.1	BGLU21; catalytic/ cation binding / hydrolase, hydrolyzing O-glycosyl compounds	K.NLNTDAFR.L	2	949.473	25.85	3.26498	2	2	0.83	4	14658744	11403992	1.29	0	15N
AT1G66270.1	BGLU21; catalytic/ cation binding / hydrolase, hydrolyzing O-glycosyl compounds	K.LGTTDSVDVGTADHNR.K	3	1656.78	50.65	2.35397	1	1	0.98	2	2792689	1091585	2.56	0	15N
AT1G66270.1	BGLU21; catalytic/ cation binding / hydrolase, hydrolyzing O-glycosyl compounds	R.YKEDIQLMK.N	2	1166.61	45.47	2.22868	6	6	0.93	8	75089514	75145746	0.998333	0.00408248	15N
AT1G66270.1	BGLU21; catalytic/ cation binding / hydrolase, hydrolyzing O-glycosyl compounds	R.EYADYVFTEYGGK.V	2	1540.69	70.63	4.99779	2	2	0.85	3	27395352	15180750	1.8	0	15N
AT1G66270.1	BGLU21; catalytic/ cation binding / hydrolase, hydrolyzing O-glycosyl compounds	K.N*GIVPFVTVFHWDTPQDLEDEYGGFLSQNIVK.D	3	3664.8	37.49	5.10262	1	1	0.89	1	9406078	4988733	1.89	0	15N
AT1G66270.1	BGLU21; catalytic/ cation binding / hydrolase, hydrolyzing O-glycosyl compounds	R.LPQFTAAQK.A	2	1002.56	38.21	2.99235	2	2	0.99	2	8582171	3781452	2.27	0	15N
AT1G66270.1	BGLU21; catalytic/ cation binding / hydrolase, hydrolyzing O-glycosyl compounds	K.DFLAQGVRPSALK.R	2	1400.79	26.69	5.85386	1	1	0.97	2	1626023	612108	2.66	0	15N
AT1G66270.1	BGLU21; catalytic/ cation binding / hydrolase, hydrolyzing O-glycosyl compounds	K.N*GIVPFVTVFHWDTPQ*DLEDEYGGFLSQNIVK.D	3	3666.8	35.4	7.70519	1	1	0.91	1	6894869	3656278	1.89	0	15N
AT1G66270.1	BGLU21; catalytic/ cation binding / hydrolase, hydrolyzing O-glycosyl compounds	R.YKEDIQLM#K.N	3	1182.61	20.99	5.83459	1	1	0.97	8	2972131	2269355	1.31	0	15N
AT1G66270.1	BGLU21; catalytic/ cation binding / hydrolase, hydrolyzing O-glycosyl compounds	K.NGIVPFVTVFHWDTPQDLEDEYGGFLSQNIVK.D	3	3663.8	28.73	-0.109176	2	2	0.86	1	20048701	13204223	1.52	0	15N
AT1G66270.1	BGLU21; catalytic/ cation binding / hydrolase, hydrolyzing O-glycosyl compounds	R.HLLAMNEAICIDK.V	3	1526.77	32.87	4.58485	2	2	0.76	3	1959764	1453515	1.41	0.0848528	15N
AT1G66270.1	BGLU21; catalytic/ cation binding / hydrolase, hydrolyzing O-glycosyl compounds	K.DKYANPEIMIMENGYGDK.L	3	2086.95	48.43	4.98337	1	1	0.84	3	4260347	2935875	1.45	0	15N
AT1G66270.1	BGLU21; catalytic/ cation binding / hydrolase, hydrolyzing O-glycosyl compounds	R.FGLYYVDFK.N	2	1150.58	54.84	3.47651	9	9	0.86	4	322275297	323393394	1.01111	0.0261937	15N
AT1G66270.1	BGLU21; catalytic/ cation binding / hydrolase, hydrolyzing O-glycosyl compounds	K.NGIVPFVTVFHWDTPQ*DLEDEYGGFLSQNIVK.D	3	3665.81	41.46	6.07005	1	1	0.88	1	15679036	11925073	1.31	0	15N
AT1G66270.1	BGLU21; catalytic/ cation binding / hydrolase, hydrolyzing O-glycosyl compounds	K.QDSLVSWEPK.N	2	1187.6	35.53	5.97849	2	2	0.96	2	8954218	4145987	2.16	0	15N
AT1G66270.1	BGLU21; catalytic/ cation binding / hydrolase, hydrolyzing O-glycosyl compounds	K.IGIAHSPAWFEPHDLKDSNDAPTVSR.V	4	2859.41	33.33	2.55298	1	1	0.95	2	9009513	4410210	2.04	0	15N
AT1G66270.1	BGLU21; catalytic/ cation binding / hydrolase, hydrolyzing O-glycosyl compounds	K.NVDHSAIGSMPLTAALPVYAK.G	3	2154.14	21.48	6.26705	1	1	0.86	2	63951859	104586723	0.61	0	15N
AT1G66270.1	BGLU21; catalytic/ cation binding / hydrolase, hydrolyzing O-glycosyl compounds	R.LSIAWSR.I	2	831.473	49.58	6.13373	3	3	0.95	5	26186417	18713107	1.4	2.98023e-08	15N
AT1G66270.1	BGLU21; catalytic/ cation binding / hydrolase, hydrolyzing O-glycosyl compounds	R.VLDFMLGWHLEPTTSGDYPQIMK.D	3	2677.32	49.19	6.68584	2	2	0.96	2	41673539	21081621	1.98	0	15N
AT1G66280.1	BGLU22; catalytic/ cation binding / hydrolase, hydrolyzing O-glycosyl compounds	K.FYHDLIDELLK.N	3	1404.75	34.84	8.89846	2	2	0.91	4	11431043	25759049	0.44	0	14N
AT1G66280.1	BGLU22; catalytic/ cation binding / hydrolase, hydrolyzing O-glycosyl compounds	K.GVSQAGVKFYHDLIDELLK.N	2	2131.11	81.47	-14.1708	17	17	0.75	1	65092942	76734936	0.814118	0.0367524	14N
AT1G66280.1	BGLU22; catalytic/ cation binding / hydrolase, hydrolyzing O-glycosyl compounds	K.NVDHSAIGSQPLTAALPVYAK.G	3	2151.15	48.1	3.90491	1	1	0.95	1	10358421	24935280	0.42	0	14N
AT1G66280.1	BGLU22; catalytic/ cation binding / hydrolase, hydrolyzing O-glycosyl compounds	R.VLDFMLGWHLDPTTFGDYPQIMK.D	3	2723.34	38.39	5.98534	2	2	0.92	1	18812092	41760016	0.45	0	14N
AT1G66280.1	BGLU22; catalytic/ cation binding / hydrolase, hydrolyzing O-glycosyl compounds	R.GPALWDIFCK.R	2	1205.61	39.52	5.64035	1	1	0.86	1	5243935	10384894	0.5	0	14N
AT1G66280.1	BGLU22; catalytic/ cation binding / hydrolase, hydrolyzing O-glycosyl compounds	K.N*GIIPFVTVFHWDTPQDLEDEYGGFLSENIVK.D	3	3680.81	23.04	7.26821	1	1	0.89	1	3015046	5153410	0.59	0	14N
AT1G66280.1	BGLU22; catalytic/ cation binding / hydrolase, hydrolyzing O-glycosyl compounds	K.QDSLVAWEPK.N	2	1171.6	27.95	5.29193	1	1	0.79	1	3586699	10914342	0.33	0	14N
AT1G66280.1	BGLU22; catalytic/ cation binding / hydrolase, hydrolyzing O-glycosyl compounds	R.GPALWDIFCK.R	2	1205.61	44.39	7.29928	1	1	0.93	1	13502938	8525515	1.58	0	15N
AT1G66280.1	BGLU22; catalytic/ cation binding / hydrolase, hydrolyzing O-glycosyl compounds	K.GVSQ*AGVKFYHDLIDELLK.N	2	2132.13	42.1	2.39198	1	1	0.82	1	54671186	72098444	0.76	0	15N
AT1G66280.1	BGLU22; catalytic/ cation binding / hydrolase, hydrolyzing O-glycosyl compounds	K.FYHDLIDELLK.N	2	1404.75	55.15	6.54927	3	3	0.95	4	22863071	17744412	1.09667	0.334863	15N
AT1G66280.1	BGLU22; catalytic/ cation binding / hydrolase, hydrolyzing O-glycosyl compounds	R.CSGHN*ADVAVDFFHR.Y	4	1731.76	46.68	5.13931	1	1	0.73	1	2898602	1596361	1.82	0	15N
AT1G66280.1	BGLU22; catalytic/ cation binding / hydrolase, hydrolyzing O-glycosyl compounds	K.GVSQAGVKFYHDLIDELLK.N	2	2131.11	83.31	-12.6693	16	16	0.89	1	72885851	65809346	1.02062	0.0828226	15N
AT1G66280.1	BGLU22; catalytic/ cation binding / hydrolase, hydrolyzing O-glycosyl compounds	K.NVDHSAIGSQPLTAALPVYAK.G	3	2151.14	26.88	2.18489	1	1	0.98	1	21094696	13756050	1.53	0	15N
AT1G66280.1	BGLU22; catalytic/ cation binding / hydrolase, hydrolyzing O-glycosyl compounds	R.CSGHNADVAVDFFHR.Y	4	1730.78	33.88	6.58668	1	1	0.95	1	3679750	2578909	1.43	0	15N
AT1G66280.1	BGLU22; catalytic/ cation binding / hydrolase, hydrolyzing O-glycosyl compounds	R.VLDFMLGWHLDPTTFGDYPQIMK.D	3	2723.34	65.4	8.26197	3	3	0.96	1	32870040	25985702	1.26	0	15N
AT1G66280.1	BGLU22; catalytic/ cation binding / hydrolase, hydrolyzing O-glycosyl compounds	K.NGIIPFVTVFHWDTPQDLEDEYGGFLSENIVK.D	3	3678.82	40.22	5.46374	2	2	0.84	1	11161874	8451668	1.32	0	15N
AT1G66280.1	BGLU22; catalytic/ cation binding / hydrolase, hydrolyzing O-glycosyl compounds	K.N*GIIPFVTVFHWDTPQDLEDEYGGFLSENIVK.D	3	3679.79	36.39	2.7719	1	1	0.92	1	5715368	4668564	1.22	0	15N
AT1G66280.1	BGLU22; catalytic/ cation binding / hydrolase, hydrolyzing O-glycosyl compounds	K.IGIAHSPAWFEPHDLKDSNDVPTVSR.V	4	2887.44	28.61	2.66673	1	1	0.92	1	5992651	4367498	1.37	0	15N
AT1G66280.1	BGLU22; catalytic/ cation binding / hydrolase, hydrolyzing O-glycosyl compounds	K.NGIIPFVTVFHWDTPQ*DLEDEYGGFLSENIVK.D	3	3679.82	30.58	9.75602	2	2	0.82	1	9295587	7611978	1.22	0	15N
AT1G66280.1	BGLU22; catalytic/ cation binding / hydrolase, hydrolyzing O-glycosyl compounds	K.N*GIIPFVTVFHWDTPQ*DLEDEYGGFLSEN*IVK.D	3	3681.8	45	13.0101	1	1	0.76	1	3614548	4437921	0.81	0	15N
AT1G66290.1	F-box family protein	R.NFLVGLSR.V	2	904.505	31.65	-17.91	1	1	0.82	1	2681184	3727225	0.72	0	14N
AT1G66410.1	CAM4 (calmodulin 4); calcium ion binding / signal transducer	R.VFDKDQ*NGFISAAELR.H	3	1809.9	30.58	2.09957	2	2	0.91	8	3207001	3527809	0.85	0.0848528	14N
AT1G66410.1	CAM4 (calmodulin 4); calcium ion binding / signal transducer	R.SLGQN*PTEAELQDMINEVDADGNGTIDFPEFLN*LMAK.K	3	4039.91	77.44	12.8016	1	1	0.97	3	4052263	6972167	0.58	0	14N
AT1G66410.1	CAM4 (calmodulin 4); calcium ion binding / signal transducer	R.VFDKDQNGFISAAELR.H	2	1808.92	73.4	4.47783	2	2	0.97	8	1095220	1353470	0.77	0.0565685	14N
AT1G66410.1	CAM4 (calmodulin 4); calcium ion binding / signal transducer	R.SLGQNPTEAELQDMINEVDADGN*GTIDFPEFLNLMAK.K	3	4036.89	48.13	7.60491	1	1	0.92	3	5729411	8135022	0.7	0	14N
AT1G66410.1	CAM4 (calmodulin 4); calcium ion binding / signal transducer	R.SLGQNPTEAELQDMINEVDADGNGTIDFPEFLN*LMAK.K	3	4036.9	27.03	7.8774	1	1	0.96	3	1738751	1234280	1.41	0	15N
AT1G66410.1	CAM4 (calmodulin 4); calcium ion binding / signal transducer	R.VFDKDQNGFISAAELR.H	3	1808.92	35.55	4.31198	2	2	0.98	8	30853035	24062149	1.24	0.0565685	15N
AT1G66410.1	CAM4 (calmodulin 4); calcium ion binding / signal transducer	K.DTDSEEELKEAFR.V	3	1567.72	28.78	5.10299	1	1	0.94	8	4145191	2514109	1.65	0	15N
AT1G66410.1	CAM4 (calmodulin 4); calcium ion binding / signal transducer	R.SLGQNPTEAELQDMINEVDADGNGTIDFPEFLNLMAK.K	3	4035.9	48.29	4.53433	3	3	0.96	3	9274858	7732737	1.2	0	15N
AT1G67280.1	lactoylglutathione lyase, putative / glyoxalase I, putative	R.GPTPEPLCQ*VM#LR.V	4	1514.76	20.35	12.7139	1	1	0.76	2	2473528	137590	17.98	0	15N
AT1G67430.1	60S ribosomal protein L17 (RPL17B)	K.SAQFVLDLLK.N	2	1132.67	58.13	7.59277	3	3	0.92	2	14296896	18526089	0.77	0	14N
AT1G67430.1	60S ribosomal protein L17 (RPL17B)	R.YLEDVIAHK.Q	3	1086.59	35.81	5.89005	2	2	0.86	2	2059362	2179464	0.865	0.106066	14N
AT1G67430.1	60S ribosomal protein L17 (RPL17B)	K.SAQFVLDLLK.N	2	1132.66	60.82	5.56214	2	2	0.94	2	15253228	13185252	1.16	0	15N
AT1G67430.1	60S ribosomal protein L17 (RPL17B)	R.YLEDVIAHK.Q	3	1086.59	31.03	5.79801	3	3	0.91	2	1977533	1907247	1.36	0.277128	15N
AT1G68560.1	XYL1 (ALPHA-XYLOSIDASE 1); alpha-N-arabinofuranosidase/ hydrolase, hydrolyzing O-glycosyl compounds / xylan 1,4-beta-xylosidase	K.IYGSDITTLR.L	2	1137.62	23.86	4.9226	1	1	0.86	1	796459	1209110	0.66	0	15N
AT1G68560.1	XYL1 (ALPHA-XYLOSIDASE 1); alpha-N-arabinofuranosidase/ hydrolase, hydrolyzing O-glycosyl compounds / xylan 1,4-beta-xylosidase	K.TIATSATHYN*GVR.E	3	1390.69	20.71	2.1572	1	1	0.88	1	229505	289451	0.79	0	15N
AT1G70410.3	carbonic anhydrase, putative / carbonate dehydratase, putative	K.GTFDLWELDFK.T	2	1369.67	42.77	5.84085	1	1	0.84	3	1456547	2410534	0.6	0	14N
AT1G70410.3	carbonic anhydrase, putative / carbonate dehydratase, putative	K.GLMSIEDDAAPTQSDFIENWVK.I	2	2465.17	25.25	6.61217	1	1	0.94	2	2576072	1164936	2.21	0	15N
AT1G70410.3	carbonic anhydrase, putative / carbonate dehydratase, putative	R.VCPSHILNFQPGEAFVVR.N	3	2069.07	24.26	4.68812	1	1	0.84	2	4265844	3392965	1.26	0	15N
AT1G70410.3	carbonic anhydrase, putative / carbonate dehydratase, putative	K.ELDSSNSDAIER.I	2	1334.61	29.42	3.44672	1	1	0.77	2	290203	65347	4.44	0	15N
AT1G70410.3	carbonic anhydrase, putative / carbonate dehydratase, putative	K.GTFDLWELDFK.T	2	1369.67	48.45	8.32321	1	1	0.87	3	2946076	1532282	1.92	0	15N
AT1G70490.1	ARFA1D; GTP binding / phospholipase activator/ protein binding	K.QDLPNAMNAAEITDK.L	2	1629.78	52.27	2.57704	1	1	0.93	5	2757934	3324674	0.83	0	14N
AT1G70490.1	ARFA1D; GTP binding / phospholipase activator/ protein binding	K.NISFTVWDVGGQDK.I	2	1564.77	67.71	5.68777	2	2	0.86	5	4485172	4699618	0.95	0	14N
AT1G70490.1	ARFA1D; GTP binding / phospholipase activator/ protein binding	R.ILMVGLDAAGK.T	2	1086.63	39.96	6.71809	1	1	0.83	5	3572272	4796837	0.74	0	14N
AT1G70490.1	ARFA1D; GTP binding / phospholipase activator/ protein binding	R.MLNEDELRDAVLLVFANK.Q	3	2089.11	21.74	8.08963	1	1	0.93	5	131249989	26689777	4.92	0	14N
AT1G70490.1	ARFA1D; GTP binding / phospholipase activator/ protein binding	K.QDLPNAMNAAEITDKLGLHSLR.Q	4	2406.26	56.13	6.44158	1	1	0.94	5	7456510	9661861	0.77	0	14N
AT1G70490.1	ARFA1D; GTP binding / phospholipase activator/ protein binding	R.DAVLLVFANK.Q	2	1088.63	45.29	3.21505	1	1	0.47	5	2177406	2250083	0.97	0	15N
AT1G70490.1	ARFA1D; GTP binding / phospholipase activator/ protein binding	K.QDLPNAMNAAEITDK.L	2	1629.78	84.12	4.35643	1	1	0.92	5	7053826	5799437	1.22	0	15N
AT1G70490.1	ARFA1D; GTP binding / phospholipase activator/ protein binding	K.NISFTVWDVGGQDK.I	2	1564.77	72.48	4.79307	2	2	0.79	5	7234567	6211773	1.16	0	15N
AT1G70490.1	ARFA1D; GTP binding / phospholipase activator/ protein binding	K.QDLPNAMNAAEITDKLGLHSLR.Q	4	2406.26	59.31	7.35587	1	1	0.93	5	3736237	3173313	1.18	0	15N
AT1G70770.1	unknown protein	K.IDPLNLEAFLVEASESYASQPEIQLMR.F	3	3062.55	28.48	5.15913	1	1	0.91	1	2815577	4459119	0.63	0	14N
AT1G70830.2	MLP28 (MLP-LIKE PROTEIN 28)	R.VIEGDLMKEYK.S	2	1323.68	25.81	1.81312	1	1	0.93	7	4776213	5460524	0.87	0	14N
AT1G70830.2	MLP28 (MLP-LIKE PROTEIN 28)	K.NLITFR.V	2	762.45	27.25	4.32817	1	1	0.96	8	39282685	38427960	1.02	0	15N
AT1G70830.2	MLP28 (MLP-LIKE PROTEIN 28)	R.VIEGDLMK.E	2	903.485	23.9	4.09527	1	1	0.93	7	8248712	6495079	1.27	0	15N
AT1G70840.1	MLP31 (MLP-LIKE PROTEIN 31)	K.ERIEAVEPEK.N	3	1198.63	28.89	6.50744	1	1	0.81	3	297790	319052	0.93	0	14N
AT1G70840.1	MLP31 (MLP-LIKE PROTEIN 31)	R.IEAVEPEKNLITFR.V	2	1657.92	33.59	6.33327	1	1	0.98	3	3296849	13175369	0.25	0	14N
AT1G70840.1	MLP31 (MLP-LIKE PROTEIN 31)	K.SFVITIQVTPK.R	2	1231.73	38.87	5.03359	1	1	0.92	2	2605259	7617344	0.34	0	14N
AT1G70840.1	MLP31 (MLP-LIKE PROTEIN 31)	R.IEAVEPEKNLITFR.V	3	1657.92	46.87	4.2825	3	3	0.96	3	1907685	2148800	1.01	0.103923	15N
AT1G70840.1	MLP31 (MLP-LIKE PROTEIN 31)	K.SFVITIQVTPK.R	2	1231.73	31.69	7.38801	2	2	0.96	2	5442873	12064947	0.355	0.13435	15N
AT1G70850.1	MLP34 (MLP-LIKE PROTEIN 34)	K.HGGPGSIVHWHLEYEK.I	4	1844.92	25.97	6.82963	4	4	0.84	2	14596440	15057319	0.97	0	14N
AT1G70850.1	MLP34 (MLP-LIKE PROTEIN 34)	K.IN*EEVAHPETLLQFAVEVSKEIDEHLLAEE.-	3	3431.75	26.82	11.5977	1	1	0.82	1	8920007	12044265	0.74	0	14N
AT1G70850.1	MLP34 (MLP-LIKE PROTEIN 34)	K.INEEVAHPETLLQFAVEVSKEIDEHLLAEE.-	3	3430.75	45.27	7.57858	5	5	0.8	1	11580835	13150299	0.848	0.0438178	14N
AT1G70850.1	MLP34 (MLP-LIKE PROTEIN 34)	K.ERIEAVDPEK.N	3	1184.62	22.59	5.90911	1	1	0.91	1	383575	240623	1.59	0	14N
AT1G70850.1	MLP34 (MLP-LIKE PROTEIN 34)	K.ATPGNIQSCDLHEGDWGTVGSIVFWNYVHDGEAK.V	3	3758.76	30.14	11.1208	1	1	0.9	1	7555244	8417068	0.9	0	14N
AT1G70850.1	MLP34 (MLP-LIKE PROTEIN 34)	R.IEAVDPEKNLITFR.V	3	1643.9	45.97	4.68399	3	3	0.9	1	54660889	68451805	0.8	0	14N
AT1G70850.1	MLP34 (MLP-LIKE PROTEIN 34)	K.INEEVAHPETLLQ*FAVEVSKEIDEHLLAEE.-	4	3432.74	26.08	8.49298	1	1	0.8	1	68614815	99056634	0.69	0	14N
AT1G70850.1	MLP34 (MLP-LIKE PROTEIN 34)	K.INEEVAHPETLLQFAVEVSK.E	3	2252.2	66.03	8.39188	3	3	0.92	1	24064113	29424070	0.823333	0.0057735	14N
AT1G70850.1	MLP34 (MLP-LIKE PROTEIN 34)	K.SFLITIQVTPK.H	2	1245.75	55.02	7.46544	4	4	0.82	3	6617479	8715471	0.76	0	14N
AT1G70850.1	MLP34 (MLP-LIKE PROTEIN 34)	K.ASPGNIQSCDLHEGDWGTVGSIVFWNYVHDGEAK.V	3	3744.7	34.25	0.320453	1	1	0.72	2	7415864	7680723	0.97	0	14N
AT1G70850.1	MLP34 (MLP-LIKE PROTEIN 34)	K.INEEVAHPETLLQFAVEVSKEIDEHLLAEE.-	4	3430.75	23.25	7.46199	1	1	0.82	1	22053355	19530262	1.13	0	15N
AT1G70850.1	MLP34 (MLP-LIKE PROTEIN 34)	K.INEEVAHPETLLQFAVEVSK.E	3	2252.19	70.67	5.9498	7	7	0.87	1	112760609	97582539	1.14857	0.0302372	15N
AT1G70850.1	MLP34 (MLP-LIKE PROTEIN 34)	K.SFLITIQVTPK.H	2	1245.75	71.88	8.10762	7	7	0.91	3	32469257	27025990	1.21429	0.0299205	15N
AT1G70850.1	MLP34 (MLP-LIKE PROTEIN 34)	K.LETEVEIK.A	2	959.53	26.98	4.5856	1	1	0.99	3	7236910	4574398	1.58	0	15N
AT1G70850.1	MLP34 (MLP-LIKE PROTEIN 34)	K.ASPGNIQSCDLHEGDWGTVGSIVFWNYVHDGEAK.V	4	3744.72	36.24	6.14202	2	2	0.8	2	114076545	106206876	1.195	0.176777	15N
AT1G70850.1	MLP34 (MLP-LIKE PROTEIN 34)	K.HGGPGSIVHWHLEYEK.I	4	1844.91	23.23	5.85396	3	3	0.81	2	19301042	12348671	1.55667	0.0057735	15N
AT1G70850.1	MLP34 (MLP-LIKE PROTEIN 34)	K.EIDEHLLAEE.-	2	1196.57	32.97	3.92791	2	2	0.96	7	37091939	33650790	1.1	0	15N
AT1G70850.1	MLP34 (MLP-LIKE PROTEIN 34)	K.ATPGNIQSCDLHEGDWGTVGSIVFWNYVHDGEAK.V	3	3758.72	25.88	1.38345	1	1	0.92	1	9655177	7914627	1.22	0	15N
AT1G70850.1	MLP34 (MLP-LIKE PROTEIN 34)	R.IEAVDPEKNLITFR.V	3	1643.9	34.72	4.80566	2	2	0.91	1	31696947	28874446	1.1	0	15N
AT1G70890.1	MLP43 (MLP-LIKE PROTEIN 43)	K.VLEGDLMNEYK.S	2	1309.64	62.83	4.19966	1	1	0.89	1	3229477	2536872	1.27	0	14N
AT1G70890.1	MLP43 (MLP-LIKE PROTEIN 43)	K.VLEGDLMNEYK.S	2	1309.64	61.4	3.97059	1	1	0.95	1	2585326	2560795	1.01	0	15N
AT1G71920.1	histidinol-phosphate aminotransferase, putative	K.ILEMPILVVLDEAYIEFSGVESR.M	3	2621.39	33.99	7.55329	1	1	0.74	3	547344	544622	1	0	15N
AT1G72000.1	beta-fructofuranosidase, putative / invertase, putative / saccharase, putative / beta-fructosidase, putative	R.VAPVDSGFWWIILLR.A	2	1772	42.61	5.164	1	1	0.63	7	705040	1445644	0.49	0	15N
AT1G72150.1	PATL1 (PATELLIN 1); transporter	K.DTPLTEETITEAIVKPAAN*YTIELPASEACTLSWELR.V	3	4133.09	36.54	9.70228	1	1	0.89	1	1654891	2173420	0.76	0	14N
AT1G72150.1	PATL1 (PATELLIN 1); transporter	K.VVVLTAEEVQK.K	2	1213.71	53.86	5.10835	1	1	0.9	1	768628	1197814	0.64	0	15N
AT1G72150.1	PATL1 (PATELLIN 1); transporter	K.DTPLTEETITEAIVKPAAN*YTIELPASEACTLSWELR.V	3	4133.08	36.58	7.91184	1	1	0.92	1	1519825	1959730	0.78	0	15N
AT1G72150.1	PATL1 (PATELLIN 1); transporter	R.ALWQFIR.R	2	932.536	53.99	5.68346	1	1	0.84	1	1259223	1271369	0.99	0	15N
AT1G72370.1	P40; structural constituent of ribosome	R.FVDIGIPANNK.G	2	1186.65	24.72	3.62367	1	1	0.94	4	8670324	8283991	1.05	0	14N
AT1G72370.1	P40; structural constituent of ribosome	K.FAQYTGANAIAGR.H	2	1338.68	58.29	5.22905	1	1	0.94	2	9059057	11181623	0.81	0	14N
AT1G72370.1	P40; structural constituent of ribosome	R.TDHQPIKEGALGNIPIIAFCDTDSPMR.F	4	2995.47	21.09	2.90439	1	1	0.83	2	6698036	7988699	0.84	0	14N
AT1G72370.1	P40; structural constituent of ribosome	K.EGALGNIPIIAFCDTDSPMR.F	2	2176.05	37.55	3.99809	1	1	0.93	2	2376775	2703876	0.88	0	14N
AT1G72370.1	P40; structural constituent of ribosome	R.LLILTDPR.T	2	939.586	32.05	3.40577	1	1	0.97	4	11439376	13752059	0.83	0	14N
AT1G72370.1	P40; structural constituent of ribosome	K.FAQYTGANAIAGR.H	2	1338.68	70.96	2.09162	1	1	0.98	2	11966079	10486529	1.14	0	15N
AT1G72370.1	P40; structural constituent of ribosome	R.RNDGIYIFNLGK.T	3	1408.76	22.81	4.82696	1	1	0.95	2	3451955	3183073	1.08	0	15N
AT1G72370.1	P40; structural constituent of ribosome	R.LLILTDPR.T	2	939.588	32.29	4.89579	2	2	0.94	4	13411918	11243281	1.19	0	15N
AT1G72370.1	P40; structural constituent of ribosome	R.FVDIGIPANNK.G	2	1187.64	28.11	-4.59667	2	2	0.97	4	13035193	7796161	1.67	0	15N
AT1G72370.1	P40; structural constituent of ribosome	K.HSIGCLFWLLAR.M	3	1471.8	43.1	8.90077	1	1	0.9	4	3359718	3021315	1.11	0	15N
AT1G72370.1	P40; structural constituent of ribosome	K.EGALGNIPIIAFCDTDSPMR.F	2	2176.05	56.21	3.99809	1	1	0.96	2	4112865	3569372	1.15	0	15N
AT1G73260.1	trypsin and protease inhibitor family protein / Kunitz family protein	R.LALSDKPFLVMFK.K	3	1507.87	21.36	8.48888	1	1	0.89	1	2750754	2374622	1.16	0	14N
AT1G74020.1	SS2 (STRICTOSIDINE SYNTHASE 2); strictosidine synthase	R.FSPIQVLIALGLK.D	2	1397.88	31.49	7.51142	1	1	0.91	1	981419	1711184	0.57	0	14N
AT1G74020.1	SS2 (STRICTOSIDINE SYNTHASE 2); strictosidine synthase	R.FSPIQVLIALGLK.D	2	1397.88	44.95	7.94064	2	2	0.89	1	1628955	1169088	1.39	0	15N
AT1G74030.1	enolase, putative	R.NQADVDALMLELDGTPNK.S	2	1942.95	57.23	5.97034	1	1	0.88	1	1638306	2385363	0.69	0	14N
AT1G74030.1	enolase, putative	R.IEEELGNVR.Y	2	1057.55	55.77	3.02587	1	1	0.93	1	1104132	1216805	0.91	0	14N
AT1G74030.1	enolase, putative	R.EGLVLLIDAIEK.A	2	1311.78	44.65	9.14793	1	1	0.72	1	1754761	2481274	0.71	0	14N
AT1G74030.1	enolase, putative	K.VNQIGTVTESIQAALDSK.A	2	1873	75.31	6.19332	1	1	0.91	1	2362991	4044103	0.58	0	14N
AT1G74030.1	enolase, putative	K.NINELVAPK.L	2	996.573	25.15	5.31825	1	1	0.6	1	973154	1025909	0.95	0	15N
AT1G74030.1	enolase, putative	R.NQADVDALMLELDGTPNK.S	2	1942.95	109.7	3.80866	1	1	0.87	1	2066861	2091225	0.99	0	15N
AT1G74030.1	enolase, putative	R.IEEELGNVR.Y	2	1057.55	45.5	4.25513	1	1	0.97	1	1432744	922500	1.55	0	15N
AT1G74030.1	enolase, putative	R.GNPTVEVDLITDDLYR.S	2	1818.91	42	1.53939	1	1	0.69	1	2033797	2244720	0.91	0	15N
AT1G74030.1	enolase, putative	R.EGLVLLIDAIEK.A	2	1311.78	45.09	6.40355	1	1	0.79	1	2386076	2447660	0.97	0	15N
AT1G74030.1	enolase, putative	K.AAGWGVMVSHR.S	2	1169.59	34.77	5.38653	2	2	0.94	1	599257	807043	1.14	0.565685	15N
AT1G74030.1	enolase, putative	K.VNQIGTVTESIQAALDSK.A	2	1873	68.54	4.48481	1	1	0.6	1	3531342	3994034	0.88	0	15N
AT1G74560.1	NRP1 (NAP1-RELATED PROTEIN 1); DNA binding / chromatin binding / histone binding	K.ASDEVLEVEQK.Y	2	1245.61	36.07	-2.72957	1	1	0.85	4	1186227	923602	1.28	0	15N
AT1G75270.1	DHAR2 (DEHYDROASCORBATE REDUCTASE 2); glutathione binding / glutathione dehydrogenase (ascorbate)	K.IFGAFVTFLK.S	2	1141.67	42.21	7.44529	1	1	0.85	1	2100378	2261248	0.93	0	14N
AT1G75270.1	DHAR2 (DEHYDROASCORBATE REDUCTASE 2); glutathione binding / glutathione dehydrogenase (ascorbate)	K.WVADSDVIVGLLEEKYPEPSLK.T	3	2486.32	35	5.99284	1	1	0.97	1	5499313	4684070	1.17	0	14N
AT1G75270.1	DHAR2 (DEHYDROASCORBATE REDUCTASE 2); glutathione binding / glutathione dehydrogenase (ascorbate)	K.ALVDELEALENHLK.T	3	1592.86	22.81	6.27806	1	1	0.88	1	4939534	4756993	1.04	0	15N
AT1G75270.1	DHAR2 (DEHYDROASCORBATE REDUCTASE 2); glutathione binding / glutathione dehydrogenase (ascorbate)	K.IFGAFVTFLK.S	2	1141.67	45.08	5.51827	1	1	0.79	1	2123330	2192199	0.97	0	15N
AT1G75600.1	histone H3.2, putative	R.FQSHAVLALQEAAEAYLVGLFEDTNLCAIHAK.R	4	3528.8	51.95	5.97941	3	3	0.77	5	12018806	15144724	0.79	0	14N
AT1G75600.1	histone H3.2, putative	R.FQSHAVLALQEAAEAYLVGLFEDTN*LCAIHAK.R	4	3529.82	58.54	16.2334	2	2	0.76	5	9559548	13646667	0.705	0.00707107	14N
AT1G75600.1	histone H3.2, putative	R.FQSHAVLALQ*EAAEAYLVGLFEDTNLCAIHAK.R	4	3529.8	36.77	11.6722	1	1	0.72	5	11682822	16362016	0.71	0	14N
AT1G75600.1	histone H3.2, putative	R.FQSHAVLALQEAAEAYLVGLFEDTNLCAIHAK.R	4	3528.8	49.28	6.74454	2	2	0.88	5	8212092	8766407	0.94	0	15N
AT1G75600.1	histone H3.2, putative	R.FQSHAVLALQEAAEAYLVGLFEDTN*LCAIHAK.R	4	3529.8	49.79	11.6722	1	1	0.77	5	8340269	9939051	0.84	0	15N
AT1G75630.1	AVA-P4; ATPase	K.SGVGVASMGVMRPELVMK.S	3	1846.96	32.8	4.06074	1	1	0.93	3	8760714	10508535	0.83	0	14N
AT1G75630.1	AVA-P4; ATPase	K.SGVGVASMGVMRPELVMK.S	3	1846.96	36.34	4.27731	1	1	0.95	3	16365581	14188734	1.15	0	15N
AT1G75780.1	TUB1; GTP binding / GTPase/ structural molecule	K.LAVNLIPFPR.L	2	1138.7	44.6	6.84995	1	1	0.93	8	13228477	18173888	0.73	0	14N
AT1G75780.1	TUB1; GTP binding / GTPase/ structural molecule	R.VSEQFTAMFR.R	2	1214.59	73.32	2.30532	1	1	0.91	8	2742583	3434761	0.8	0	14N
AT1G75780.1	TUB1; GTP binding / GTPase/ structural molecule	R.LHFFMVGFAPLTSR.G	3	1621.86	34.19	5.48755	3	3	0.88	8	20327261	26671765	0.76	0	14N
AT1G75780.1	TUB1; GTP binding / GTPase/ structural molecule	R.MMLTFSVFPSPK.V	2	1383.71	31.86	8.74466	1	1	0.88	5	4147761	4641516	0.89	0	14N
AT1G75780.1	TUB1; GTP binding / GTPase/ structural molecule	R.AVLMDLEPGTMDSIR.S	2	1646.82	41.3	4.31137	1	1	0.86	2	9302059	12636756	0.74	0	14N
AT1G75780.1	TUB1; GTP binding / GTPase/ structural molecule	K.EAENCDCLQGFQVCHSLGGGTGSGMGTLLISK.I	3	3382.52	42.57	1.68514	1	1	0.91	7	1990683	2302524	0.86	0	14N
AT1G75780.1	TUB1; GTP binding / GTPase/ structural molecule	R.AVLMDLEPGTMDSIR.S	2	1646.81	57.55	2.73256	3	3	0.95	2	15415369	11921761	1.14	0.259808	15N
AT1G75780.1	TUB1; GTP binding / GTPase/ structural molecule	K.GHYTEGAELIDAVLDVVR.K	3	1956.01	29.23	5.41921	1	1	0.91	3	1921219	1871130	1.03	0	15N
AT1G75780.1	TUB1; GTP binding / GTPase/ structural molecule	R.VSEQFTAMFR.R	2	1214.59	55.02	3.54031	1	1	0.93	8	3838305	2935897	1.31	0	15N
AT1G75780.1	TUB1; GTP binding / GTPase/ structural molecule	R.LHFFMVGFAPLTSR.G	3	1621.86	38.25	6.41242	2	2	0.96	8	26672739	24253930	1.1	0	15N
AT1G75780.1	TUB1; GTP binding / GTPase/ structural molecule	K.NSSYFVEWIPNNVK.S	2	1695.84	28.36	5.543	1	1	0.89	8	14888128	17093039	0.87	0	15N
AT1G75780.1	TUB1; GTP binding / GTPase/ structural molecule	R.MMLTFSVFPSPK.V	2	1383.71	61.62	6.43203	2	2	0.95	5	5756860	4492276	1.28	0	15N
AT1G75950.1	SKP1 (S PHASE KINASE-ASSOCIATED PROTEIN 1); protein binding / ubiquitin-protein ligase	K.NLLDLTCQTVADMIK.G	2	1733.89	59.21	5.01766	1	1	0.82	1	3779744	4738008	0.8	0	14N
AT1G75950.1	SKP1 (S PHASE KINASE-ASSOCIATED PROTEIN 1); protein binding / ubiquitin-protein ligase	K.IDQATLFELILAANYLNIK.N	3	2162.22	36.43	5.96613	2	2	0.91	1	1550227	1615407	0.96	0	15N
AT1G75950.1	SKP1 (S PHASE KINASE-ASSOCIATED PROTEIN 1); protein binding / ubiquitin-protein ligase	K.NLLDLTCQTVADMIK.G	2	1733.88	75.52	3.46045	1	1	0.9	1	3310265	3535528	0.94	0	15N
AT1G76030.1	vacuolar ATP synthase subunit B / V-ATPase B subunit / vacuolar proton pump B subunit / V-ATPase 57 kDa subunit	R.IALTTAEYLAYECGK.H	2	1701.85	32.25	10.048	1	1	0.88	3	2197670	2011374	1.09	0	14N
AT1G76030.1	vacuolar ATP synthase subunit B / V-ATPase B subunit / vacuolar proton pump B subunit / V-ATPase 57 kDa subunit	K.TPVSLDMLGR.I	2	1087.58	35.82	5.33295	1	1	0.89	3	6067945	7392701	0.82	0	14N
AT1G76030.1	vacuolar ATP synthase subunit B / V-ATPase B subunit / vacuolar proton pump B subunit / V-ATPase 57 kDa subunit	R.TYPEEMIQTGISTIDVMNSIAR.G	2	2468.22	82.83	7.25225	2	2	0.97	3	3253969	4182476	0.815	0.0494975	14N
AT1G76030.1	vacuolar ATP synthase subunit B / V-ATPase B subunit / vacuolar proton pump B subunit / V-ATPase 57 kDa subunit	R.VTLFLNLANDPTIER.I	2	1714.94	61.54	4.19841	2	2	0.94	3	8262084	10848604	0.76	0	14N
AT1G76030.1	vacuolar ATP synthase subunit B / V-ATPase B subunit / vacuolar proton pump B subunit / V-ATPase 57 kDa subunit	R.GYPGYMYTDLATIYER.A	2	1911.89	60.18	4.28897	1	1	0.9	3	5877133	7228359	0.81	0	14N
AT1G76030.1	vacuolar ATP synthase subunit B / V-ATPase B subunit / vacuolar proton pump B subunit / V-ATPase 57 kDa subunit	K.AVVQVFEGTSGIDNK.F	2	1562.81	51.85	4.60711	2	2	0.89	3	3292626	4403683	0.75	0	14N
AT1G76030.1	vacuolar ATP synthase subunit B / V-ATPase B subunit / vacuolar proton pump B subunit / V-ATPase 57 kDa subunit	R.TVSGVAGPLVILDK.V	2	1367.81	28.82	1.5353	1	1	0.96	2	4719512	6215401	0.76	0	14N
AT1G76030.1	vacuolar ATP synthase subunit B / V-ATPase B subunit / vacuolar proton pump B subunit / V-ATPase 57 kDa subunit	R.IFN*GSGKPIDNGPPILPEAYLDISGSSINPSER.T	3	3454.76	60.87	7.67064	1	1	0.97	3	4684034	5123275	0.91	0	14N
AT1G76030.1	vacuolar ATP synthase subunit B / V-ATPase B subunit / vacuolar proton pump B subunit / V-ATPase 57 kDa subunit	R.NIFQSLDLAWTLLR.I	2	1688.94	96.75	5.56564	9	9	0.91	3	11622927	15870823	0.755556	0.0278887	14N
AT1G76030.1	vacuolar ATP synthase subunit B / V-ATPase B subunit / vacuolar proton pump B subunit / V-ATPase 57 kDa subunit	K.YQEIVNIR.L	2	1033.57	30.65	4.35387	1	1	0.97	3	4678765	5833920	0.8	0	14N
AT1G76030.1	vacuolar ATP synthase subunit B / V-ATPase B subunit / vacuolar proton pump B subunit / V-ATPase 57 kDa subunit	R.IFNGSGKPIDN*GPPILPEAYLDISGSSINPSER.T	3	3454.79	58.19	15.2255	1	1	0.94	3	2936134	4650798	0.63	0	14N
AT1G76030.1	vacuolar ATP synthase subunit B / V-ATPase B subunit / vacuolar proton pump B subunit / V-ATPase 57 kDa subunit	K.TLDQFYSR.D	2	1028.5	36.01	-2.91687	1	1	0.91	3	3696927	3749189	0.99	0	14N
AT1G76030.1	vacuolar ATP synthase subunit B / V-ATPase B subunit / vacuolar proton pump B subunit / V-ATPase 57 kDa subunit	R.QIYPPINVLPSLSR.L	2	1595.92	25.21	7.95784	1	1	0.93	3	5288495	7217654	0.73	0	14N
AT1G76030.1	vacuolar ATP synthase subunit B / V-ATPase B subunit / vacuolar proton pump B subunit / V-ATPase 57 kDa subunit	R.KFVMQGAYDTR.N	3	1314.65	25.56	4.0315	1	1	0.9	2	1797947	1935774	0.93	0	14N
AT1G76030.1	vacuolar ATP synthase subunit B / V-ATPase B subunit / vacuolar proton pump B subunit / V-ATPase 57 kDa subunit	K.IPLFSAAGLPHNEIAAQICR.Q	3	2177.16	62.96	7.02754	2	2	0.87	3	13320082	17354291	0.77	0	14N
AT1G76030.1	vacuolar ATP synthase subunit B / V-ATPase B subunit / vacuolar proton pump B subunit / V-ATPase 57 kDa subunit	K.TPVSLDMLGR.I	2	1087.58	42.84	6.06853	1	1	0.95	3	6947099	5646423	1.23	0	15N
AT1G76030.1	vacuolar ATP synthase subunit B / V-ATPase B subunit / vacuolar proton pump B subunit / V-ATPase 57 kDa subunit	R.IFN*GSGKPIDN*GPPILPEAYLDISGSSINPSER.T	3	3455.74	52.65	7.7842	1	1	0.96	3	2896715	3381592	0.86	0	15N
AT1G76030.1	vacuolar ATP synthase subunit B / V-ATPase B subunit / vacuolar proton pump B subunit / V-ATPase 57 kDa subunit	R.TYPEEMIQTGISTIDVMNSIAR.G	3	2468.21	63.49	3.76793	5	5	0.96	3	12783131	11096418	1.11	0.0547723	15N
AT1G76030.1	vacuolar ATP synthase subunit B / V-ATPase B subunit / vacuolar proton pump B subunit / V-ATPase 57 kDa subunit	K.HVLVILTDMSSYADALR.E	3	1903	46.82	4.2039	1	1	0.89	3	4154118	4637823	0.9	0	15N
AT1G76030.1	vacuolar ATP synthase subunit B / V-ATPase B subunit / vacuolar proton pump B subunit / V-ATPase 57 kDa subunit	K.AVVQVFEGTSGIDNK.F	2	1562.81	59.16	3.51932	2	2	0.94	3	7627912	6074261	1.26	0	15N
AT1G76030.1	vacuolar ATP synthase subunit B / V-ATPase B subunit / vacuolar proton pump B subunit / V-ATPase 57 kDa subunit	K.FTTVQFTGEVLK.T	2	1368.74	62.89	4.60278	1	1	0.94	2	4204843	4519057	0.93	0	15N
AT1G76030.1	vacuolar ATP synthase subunit B / V-ATPase B subunit / vacuolar proton pump B subunit / V-ATPase 57 kDa subunit	R.NIFQSLDLAWTLLR.I	2	1688.94	99.52	5.68406	5	5	0.86	3	13764383	13543597	1.02	0	15N
AT1G76030.1	vacuolar ATP synthase subunit B / V-ATPase B subunit / vacuolar proton pump B subunit / V-ATPase 57 kDa subunit	K.FVMQGAYDTR.N	2	1186.55	44.26	1.60128	1	1	0.79	2	1851589	904342	2.05	0	15N
AT1G76030.1	vacuolar ATP synthase subunit B / V-ATPase B subunit / vacuolar proton pump B subunit / V-ATPase 57 kDa subunit	R.VTLFLNLANDPTIER.I	2	1714.94	58.55	2.44907	2	2	0.97	3	10842174	9020075	1.2	0	15N
AT1G76030.1	vacuolar ATP synthase subunit B / V-ATPase B subunit / vacuolar proton pump B subunit / V-ATPase 57 kDa subunit	K.GSITQIPILTMPNDDITHPTPDLTGYITEGQ*IYIDR.Q	3	3999.02	36.99	6.37661	1	1	0.96	3	1175014	1421175	0.83	0	15N
AT1G76030.1	vacuolar ATP synthase subunit B / V-ATPase B subunit / vacuolar proton pump B subunit / V-ATPase 57 kDa subunit	R.GYPGYMYTDLATIYER.A	2	1911.88	77.5	0.993787	2	2	0.86	3	6996041	6414387	1.09	0	15N
AT1G76030.1	vacuolar ATP synthase subunit B / V-ATPase B subunit / vacuolar proton pump B subunit / V-ATPase 57 kDa subunit	R.IFNGSGKPIDNGPPILPEAYLDISGSSINPSER.T	3	3453.77	28.28	6.19616	1	1	0.98	3	6012382	5057934	1.19	0	15N
AT1G76030.1	vacuolar ATP synthase subunit B / V-ATPase B subunit / vacuolar proton pump B subunit / V-ATPase 57 kDa subunit	K.YQEIVNIR.L	2	1033.57	30.61	2.03181	1	1	0.96	3	5719654	4641588	1.23	0	15N
AT1G76030.1	vacuolar ATP synthase subunit B / V-ATPase B subunit / vacuolar proton pump B subunit / V-ATPase 57 kDa subunit	K.TLDQFYSR.D	2	1028.5	30.96	2.81964	1	1	0.9	3	4726604	3274957	1.44	0	15N
AT1G76030.1	vacuolar ATP synthase subunit B / V-ATPase B subunit / vacuolar proton pump B subunit / V-ATPase 57 kDa subunit	R.QIYPPINVLPSLSR.L	2	1595.92	25.47	6.45399	1	1	0.95	3	5779418	5605864	1.03	0	15N
AT1G76030.1	vacuolar ATP synthase subunit B / V-ATPase B subunit / vacuolar proton pump B subunit / V-ATPase 57 kDa subunit	K.IPLFSAAGLPHNEIAAQICR.Q	3	2177.16	68.95	6.15484	1	1	0.95	3	21871187	20836713	1.05	0	15N
AT1G76160.1	sks5 (SKU5 Similar 5); copper ion binding / oxidoreductase	R.IPVPFPDPAGDTTVLIGDWYK.A	2	2300.19	56.13	3.82579	1	1	0.91	1	1355300	1368804	0.99	0	15N
AT1G76180.1	ERD14 (EARLY RESPONSE TO DEHYDRATION 14); calcium ion binding	K.VATEESSAEVTDR.G	2	1392.65	84.17	2.36959	3	3	0.94	1	1487107	1246188	1.19	0	14N
AT1G76180.1	ERD14 (EARLY RESPONSE TO DEHYDRATION 14); calcium ion binding	R.GLFDFLGK.K	2	895.496	42.78	8.71033	3	3	0.92	2	18478104	20979532	0.88	0	14N
AT1G76180.1	ERD14 (EARLY RESPONSE TO DEHYDRATION 14); calcium ion binding	K.VATEESSAEVTDR.G	2	1392.65	73.58	5.02641	3	3	0.92	1	3169873	2755618	1.15	0	15N
AT1G76180.1	ERD14 (EARLY RESPONSE TO DEHYDRATION 14); calcium ion binding	R.GLFDFLGK.K	2	895.495	38.14	8.15198	3	3	0.86	2	23916304	21296929	1.12	0	15N
AT1G76180.1	ERD14 (EARLY RESPONSE TO DEHYDRATION 14); calcium ion binding	K.VHISEPEPEVK.H	2	1262.66	26.58	-2.53434	1	1	0.93	1	710074	598845	1.19	0	15N
AT1G76680.2	OPR1; 12-oxophytodienoate reductase	R.RLGIEEIPGIVNDFR.L	3	1726.96	22.46	7.87518	1	1	0.66	2	3640898	3681389	0.99	0	14N
AT1G76680.2	OPR1; 12-oxophytodienoate reductase	R.LSPFADYMESGDTNPGALGLYMAESLNK.Y	3	2990.39	26.58	3.47782	1	1	0.92	2	3264570	3170088	1.03	0	14N
AT1G76680.2	OPR1; 12-oxophytodienoate reductase	K.DTVNDRTDEYGGSLQNR.C	3	1938.89	26.02	6.34389	1	1	0.96	2	850358	892205	0.95	0	15N
AT1G76680.2	OPR1; 12-oxophytodienoate reductase	R.LSPFADYMESGDTNPGALGLYMAESLNK.Y	3	2990.41	47.68	10.701	1	1	0.93	2	3296547	3002973	1.1	0	15N
AT1G76790.1	O-methyltransferase family 2 protein	M.GHLIPQTGDEETELGLAAVR.L	3	2105.1	23.22	6.08052	1	1	0.84	1	1634122	1826745	0.89	0	15N
AT1G76790.1	O-methyltransferase family 2 protein	R.DDVTGSSSFLTPSEIAIR.L	2	1893.95	65.02	4.0656	1	1	0.5	1	5192711	5367669	0.97	0	15N
AT1G77440.1	PBC2; peptidase/ threonine-type endopeptidase	R.DMKPETFASLVSAILYEK.R	3	2041.07	26.84	7.59412	2	2	0.94	2	3770794	3612853	1.04	0	15N
AT1G77510.1	ATPDIL1-2 (PDI-LIKE 1-2); protein disulfide isomerase	R.SASGNVVVYEGDR.T	2	1351.65	46.69	5.69676	1	1	0.9	3	984117	952262	1.03	0	14N
AT1G77510.1	ATPDIL1-2 (PDI-LIKE 1-2); protein disulfide isomerase	K.LDATANDIPSDTFDVK.G	2	1720.83	24.9	5.17194	1	1	0.88	1	5132718	3516025	1.46	0	14N
AT1G77510.1	ATPDIL1-2 (PDI-LIKE 1-2); protein disulfide isomerase	K.NVLIEFYAPWCGHCQ*K.L	3	2021.96	32.99	17.5081	1	1	0.94	1	2637001	4451823	0.59	0	14N
AT1G77510.1	ATPDIL1-2 (PDI-LIKE 1-2); protein disulfide isomerase	R.EAEGIVTYLK.K	2	1121.61	42.29	5.17116	1	1	0.93	3	1563905	1926032	0.81	0	14N
AT1G77510.1	ATPDIL1-2 (PDI-LIKE 1-2); protein disulfide isomerase	R.SASGNVVVYEGDR.T	2	1351.65	77.62	6.21465	1	1	0.93	3	2499021	1678995	1.49	0	15N
AT1G77510.1	ATPDIL1-2 (PDI-LIKE 1-2); protein disulfide isomerase	R.EAEGIVTYLK.K	2	1121.61	31.14	4.27958	1	1	0.94	3	2443223	2308125	1.06	0	15N
AT1G77510.1	ATPDIL1-2 (PDI-LIKE 1-2); protein disulfide isomerase	K.NVLIEFYAPWCGHCQK.L	3	2020.95	23.11	5.98732	1	1	0.9	1	4879908	4138523	1.18	0	15N
AT1G78090.1	ATTPPB (TREHALOSE-6-PHOSPHATE PHOSPHATASE); trehalose-phosphatase	K.GQ*ALN*FLLK.S	2	1006.56	30.85	-12.0542	1	1	0.97	1	3948235	185184	21.32	0	14N
AT1G78300.1	GRF2 (GENERAL REGULATORY FACTOR 2); protein binding / protein phosphorylated amino acid binding	K.QAFDEAIAELDTLGEESYKDSTLIMQLLR.D	3	3298.65	86.16	4.15323	8	8	0.74	4	24557123	35689007	0.69	0	14N
AT1G78300.1	GRF2 (GENERAL REGULATORY FACTOR 2); protein binding / protein phosphorylated amino acid binding	R.DNLTLWTSDMQDDAADEIKEAAAPKPTEEQQ.-	3	3459.58	36.13	3.35302	1	1	0.94	1	4267770	5292822	0.81	0	14N
AT1G78300.1	GRF2 (GENERAL REGULATORY FACTOR 2); protein binding / protein phosphorylated amino acid binding	R.NLLSVAYK.N	2	906.531	39.65	6.8393	1	1	0.95	12	29276625	38687807	0.76	0	14N
AT1G78300.1	GRF2 (GENERAL REGULATORY FACTOR 2); protein binding / protein phosphorylated amino acid binding	R.IISSIEQKEESR.G	2	1417.76	69.73	4.30259	2	2	0.94	5	4670015	6561812	0.735	0.0353553	14N
AT1G78300.1	GRF2 (GENERAL REGULATORY FACTOR 2); protein binding / protein phosphorylated amino acid binding	K.SAQDIANAELAPTHPIR.L	3	1802.94	43.84	2.55139	1	1	0.88	1	4614561	6207972	0.74	0	14N
AT1G78300.1	GRF2 (GENERAL REGULATORY FACTOR 2); protein binding / protein phosphorylated amino acid binding	K.LAEQAERYEEMVEFMEK.V	3	2130.98	44.63	4.73963	3	3	0.92	8	16486886	23104222	0.75	0.069282	14N
AT1G78300.1	GRF2 (GENERAL REGULATORY FACTOR 2); protein binding / protein phosphorylated amino acid binding	R.YEEMVEFMEK.V	2	1333.57	41.22	4.0493	1	1	0.86	8	8981034	6363661	1.41	0	15N
AT1G78300.1	GRF2 (GENERAL REGULATORY FACTOR 2); protein binding / protein phosphorylated amino acid binding	R.DNLTLWTSDMQDDAADEIKEAAAPKPTEEQQ.-	3	3459.58	31.55	2.63038	1	1	0.91	1	5290517	4891336	1.08	0	15N
AT1G78300.1	GRF2 (GENERAL REGULATORY FACTOR 2); protein binding / protein phosphorylated amino acid binding	K.QAFDEAIAELDTLGEESYKDSTLIMQ*LLR.D	3	3300.65	83.9	6.95395	1	1	0.83	4	32544499	29655395	1.1	0	15N
AT1G78300.1	GRF2 (GENERAL REGULATORY FACTOR 2); protein binding / protein phosphorylated amino acid binding	R.NLLSVAYK.N	2	906.53	36.82	5.40525	1	1	0.96	12	34361895	28673027	1.2	0	15N
AT1G78300.1	GRF2 (GENERAL REGULATORY FACTOR 2); protein binding / protein phosphorylated amino acid binding	K.SAQDIANAELAPTHPIR.L	3	1802.94	40.94	0.388256	1	1	0.94	1	5687443	7642093	0.74	0	15N
AT1G78300.1	GRF2 (GENERAL REGULATORY FACTOR 2); protein binding / protein phosphorylated amino acid binding	K.VSAAVDGDELTVEER.N	2	1588.77	82.12	3.02121	1	1	0.9	1	1805417	1934611	0.93	0	15N
AT1G78300.1	GRF2 (GENERAL REGULATORY FACTOR 2); protein binding / protein phosphorylated amino acid binding	K.QAFDEAIAELDTLGEESYKDSTLIMQLLR.D	3	3298.65	122.11	5.03238	5	5	0.82	4	38248745	29903127	1.28	0	15N
AT1G78300.1	GRF2 (GENERAL REGULATORY FACTOR 2); protein binding / protein phosphorylated amino acid binding	R.IISSIEQKEESR.G	2	1417.75	42.01	2.4687	2	2	1	5	682794	464856	1.3	0.240416	15N
AT1G78300.1	GRF2 (GENERAL REGULATORY FACTOR 2); protein binding / protein phosphorylated amino acid binding	K.QAFDEAIAELDTLGEESYK.D	2	2128	95.63	4.4643	1	1	0.97	4	2651771	2039976	1.3	0	15N
AT1G78300.1	GRF2 (GENERAL REGULATORY FACTOR 2); protein binding / protein phosphorylated amino acid binding	K.LAEQAERYEEMVEFMEK.V	3	2130.98	36.36	6.38208	1	1	0.97	8	10303243	8030736	1.28	0	15N
AT1G78320.1	ATGSTU23 (GLUTATHIONE S-TRANSFERASE TAU 23); glutathione transferase	K.SPLLLQMNPIHK.K	3	1389.79	53.58	3.52572	1	1	0.83	2	3624942	6340432	0.57	0	14N
AT1G78320.1	ATGSTU23 (GLUTATHIONE S-TRANSFERASE TAU 23); glutathione transferase	K.SPLLLQMNPIHK.K	3	1389.8	38.94	5.32455	1	1	0.97	2	9286424	6813327	1.36	0	15N
AT1G78340.1	ATGSTU22 (GLUTATHIONE S-TRANSFERASE TAU 22); glutathione transferase	K.SPLLLQMN*PVHK.K	3	1376.76	27.42	5.73812	1	1	0.88	1	1945457	2538396	0.77	0	15N
AT1G78370.1	ATGSTU20 (GLUTATHIONE S-TRANSFERASE TAU 20); glutathione transferase	R.FWADFVDKK.F	3	1154.59	23.48	4.41718	1	1	0.94	1	1823359	737623	2.47	0	15N
AT1G78380.1	ATGSTU19 (GLUTATHIONE S-TRANSFERASE TAU 19); glutathione binding / glutathione transferase	K.SLPDPEKVTEFVSELR.K	3	1844.97	48.59	4.87816	1	1	0.94	1	41857067	66062571	0.63	0	14N
AT1G78380.1	ATGSTU19 (GLUTATHIONE S-TRANSFERASE TAU 19); glutathione binding / glutathione transferase	K.FANFSIESEVPK.L	2	1366.69	47.36	3.29264	2	2	0.97	1	16902138	28228017	0.6	0	14N
AT1G78380.1	ATGSTU19 (GLUTATHIONE S-TRANSFERASE TAU 19); glutathione binding / glutathione transferase	R.NKSPLLLQMNPIHK.K	3	1631.93	29.78	4.5958	1	1	0.94	2	7407512	11559329	0.64	0	14N
AT1G78380.1	ATGSTU19 (GLUTATHIONE S-TRANSFERASE TAU 19); glutathione binding / glutathione transferase	K.VTEFVSELR.K	2	1078.59	29.37	14.2781	1	1	0.55	1	4949209	2563150	1.93	0	14N
AT1G78380.1	ATGSTU19 (GLUTATHIONE S-TRANSFERASE TAU 19); glutathione binding / glutathione transferase	R.NKSPLLLQMNPIHK.K	3	1631.93	25.13	2.02215	1	1	0.96	2	14268111	7924419	1.8	0	15N
AT1G78380.1	ATGSTU19 (GLUTATHIONE S-TRANSFERASE TAU 19); glutathione binding / glutathione transferase	K.VTEFVSELR.K	2	1078.58	60.16	2.68874	1	1	0.96	1	5321879	2750038	1.94	0	15N
AT1G78380.1	ATGSTU19 (GLUTATHIONE S-TRANSFERASE TAU 19); glutathione binding / glutathione transferase	K.SLPDPEKVTEFVSELR.K	3	1844.97	44.18	7.37143	3	3	0.95	1	52406031	34105925	1.54	0	15N
AT1G78380.1	ATGSTU19 (GLUTATHIONE S-TRANSFERASE TAU 19); glutathione binding / glutathione transferase	K.GVEFEYREEDLR.N	3	1540.73	23.49	4.08899	1	1	0.9	1	10683589	7007427	1.52	0	15N
AT1G78380.1	ATGSTU19 (GLUTATHIONE S-TRANSFERASE TAU 19); glutathione binding / glutathione transferase	K.FANFSIESEVPK.L	2	1366.69	59.03	4.17068	2	2	0.96	1	28497709	18300716	1.56	0	15N
AT1G78570.1	RHM1 (RHAMNOSE BIOSYNTHESIS 1); UDP-L-rhamnose synthase/ UDP-glucose 4,6-dehydratase/ catalytic	K.TGWIGGLLGK.I	2	1000.58	56.77	6.09647	2	2	0.86	2	4839153	6268460	0.77	0	14N
AT1G78570.1	RHM1 (RHAMNOSE BIOSYNTHESIS 1); UDP-L-rhamnose synthase/ UDP-glucose 4,6-dehydratase/ catalytic	K.VVNIPNSMTVLDELLPISIEMAK.R	3	2525.38	22.51	8.79084	1	1	0.95	1	1249586	1537862	0.81	0	15N
AT1G78850.1	curculin-like (mannose-binding) lectin family protein	K.ILENGNMVIYDSSGK.F	2	1638.81	73.05	5.91896	1	1	0.87	1	2362049	2600152	0.91	0	14N
AT1G78850.1	curculin-like (mannose-binding) lectin family protein	R.LSPSVNTN*GPYSLVMEAK.K	2	1906.97	36.95	16.1515	1	1	0.94	1	2280632	4286917	0.53	0	14N
AT1G78850.1	curculin-like (mannose-binding) lectin family protein	R.LVWQTNTANK.G	2	1173.63	40.9	3.23784	1	1	0.9	1	1020313	1561010	0.65	0	14N
AT1G78850.1	curculin-like (mannose-binding) lectin family protein	R.TGDSSLVAYVK.A	2	1138.6	66.54	5.18183	1	1	0.93	1	4355462	6742729	0.65	0	14N
AT1G78850.1	curculin-like (mannose-binding) lectin family protein	K.ILEN*GNMVIYDSSGK.F	2	1639.79	57.44	4.69574	1	1	0.93	1	1343830	1566814	0.86	0	14N
AT1G78850.1	curculin-like (mannose-binding) lectin family protein	R.LSPSVNTNGPYSLVMEAK.K	2	1905.96	38.48	2.25608	1	1	0.9	1	3357193	5681471	0.59	0	15N
AT1G78850.1	curculin-like (mannose-binding) lectin family protein	K.ILEN*GNMVIYDSSGK.F	2	1639.79	82.62	2.68328	1	1	0.94	1	906767	1787862	0.51	0	15N
AT1G78860.1	curculin-like (mannose-binding) lectin family protein	K.FVWQSFDSPTDTLLVGQSLK.L	2	2267.18	50.2	12.7473	3	3	0.94	2	11069377	17062559	0.673333	0.0404145	14N
AT1G78860.1	curculin-like (mannose-binding) lectin family protein	R.VVNEGGYTDYSPIEYNPDVR.G	2	2286.07	82.28	6.82399	2	2	0.96	2	7264044	8711848	0.83	0	14N
AT1G78860.1	curculin-like (mannose-binding) lectin family protein	K.FVWQ*SFDSPTDTLLVGQSLK.L	3	2268.17	29.9	11.7718	1	1	0.87	2	2174156	3788217	0.57	0	15N
AT1G78860.1	curculin-like (mannose-binding) lectin family protein	R.VVNEGGYTDYSPIEYNPDVR.G	2	2286.05	63.99	1.39979	1	1	0.93	2	7661148	8283707	0.92	0	15N
AT1G78860.1	curculin-like (mannose-binding) lectin family protein	K.FVWQSFDSPTDTLLVGQSLK.L	2	2267.17	74.93	5.11654	2	2	0.88	2	11298085	15166424	0.74	0	15N
AT1G78860.1	curculin-like (mannose-binding) lectin family protein	K.TGDTSLVAYVK.A	2	1154.61	26.5	-3.39161	1	1	0.9	1	2726567	475383	5.74	0	15N
AT1G78900.1	VHA-A (VACUOLAR ATP SYNTHASE SUBUNIT A); ATP binding / hydrogen ion transporting ATP synthase, rotational mechanism / hydrolase, acting on acid anhydrides, catalyzing transmembrane movement of substances / proton-transporting ATPase, rotational mechanism	R.TTLVANTSNMPVAAR.E	2	1544.81	78.87	1.81253	1	1	0.9	1	7263515	9350519	0.78	0	14N
AT1G78900.1	VHA-A (VACUOLAR ATP SYNTHASE SUBUNIT A); ATP binding / hydrogen ion transporting ATP synthase, rotational mechanism / hydrolase, acting on acid anhydrides, catalyzing transmembrane movement of substances / proton-transporting ATPase, rotational mechanism	K.YSNSDAVVYVGCGER.G	2	1674.75	57.17	5.25455	1	1	0.88	1	2204414	2575968	0.86	0	14N
AT1G78900.1	VHA-A (VACUOLAR ATP SYNTHASE SUBUNIT A); ATP binding / hydrogen ion transporting ATP synthase, rotational mechanism / hydrolase, acting on acid anhydrides, catalyzing transmembrane movement of substances / proton-transporting ATPase, rotational mechanism	K.ITYIAPAGQYSLK.D	2	1423.78	24.94	3.86296	1	1	0.81	1	1717485	2249333	0.76	0	14N
AT1G78900.1	VHA-A (VACUOLAR ATP SYNTHASE SUBUNIT A); ATP binding / hydrogen ion transporting ATP synthase, rotational mechanism / hydrolase, acting on acid anhydrides, catalyzing transmembrane movement of substances / proton-transporting ATPase, rotational mechanism	R.LAEMPADSGYPAYLAAR.L	2	1794.88	55.97	3.73286	1	1	0.96	1	10443127	15085111	0.69	0	14N
AT1G78900.1	VHA-A (VACUOLAR ATP SYNTHASE SUBUNIT A); ATP binding / hydrogen ion transporting ATP synthase, rotational mechanism / hydrolase, acting on acid anhydrides, catalyzing transmembrane movement of substances / proton-transporting ATPase, rotational mechanism	K.FEDPAEGEDTLVEK.F	2	1577.72	62.26	3.04237	1	1	0.95	1	1763536	2030841	0.87	0	14N
AT1G78900.1	VHA-A (VACUOLAR ATP SYNTHASE SUBUNIT A); ATP binding / hydrogen ion transporting ATP synthase, rotational mechanism / hydrolase, acting on acid anhydrides, catalyzing transmembrane movement of substances / proton-transporting ATPase, rotational mechanism	R.ISGDVYIPR.G	2	1018.56	36.24	4.31986	1	1	0.97	1	5660834	8266433	0.68	0	14N
AT1G78900.1	VHA-A (VACUOLAR ATP SYNTHASE SUBUNIT A); ATP binding / hydrogen ion transporting ATP synthase, rotational mechanism / hydrolase, acting on acid anhydrides, catalyzing transmembrane movement of substances / proton-transporting ATPase, rotational mechanism	R.VGHDNLIGEIIR.L	3	1334.75	22.26	6.0686	1	1	0.87	1	9789005	12070799	0.81	0	14N
AT1G78900.1	VHA-A (VACUOLAR ATP SYNTHASE SUBUNIT A); ATP binding / hydrogen ion transporting ATP synthase, rotational mechanism / hydrolase, acting on acid anhydrides, catalyzing transmembrane movement of substances / proton-transporting ATPase, rotational mechanism	R.NIIHFYNLANQAVER.A	3	1800.94	53.77	3.1095	2	2	0.91	1	9382279	10802497	0.87	0	14N
AT1G78900.1	VHA-A (VACUOLAR ATP SYNTHASE SUBUNIT A); ATP binding / hydrogen ion transporting ATP synthase, rotational mechanism / hydrolase, acting on acid anhydrides, catalyzing transmembrane movement of substances / proton-transporting ATPase, rotational mechanism	K.LAADTPLLTGQR.V	2	1254.7	55.81	2.70981	1	1	0.95	1	6863914	9068063	0.76	0	14N
AT1G78900.1	VHA-A (VACUOLAR ATP SYNTHASE SUBUNIT A); ATP binding / hydrogen ion transporting ATP synthase, rotational mechanism / hydrolase, acting on acid anhydrides, catalyzing transmembrane movement of substances / proton-transporting ATPase, rotational mechanism	R.VLDALFPSVLGGTCAIPGAFGCGK.T	2	2406.23	65.05	7.72998	1	1	0.9	1	3177446	4001772	0.79	0	14N
AT1G78900.1	VHA-A (VACUOLAR ATP SYNTHASE SUBUNIT A); ATP binding / hydrogen ion transporting ATP synthase, rotational mechanism / hydrolase, acting on acid anhydrides, catalyzing transmembrane movement of substances / proton-transporting ATPase, rotational mechanism	R.LVSQKFEDPAEGEDTLVEK.F	3	2133.07	34.25	4.82875	1	1	0.92	1	8038936	10499920	0.77	0	14N
AT1G78900.1	VHA-A (VACUOLAR ATP SYNTHASE SUBUNIT A); ATP binding / hydrogen ion transporting ATP synthase, rotational mechanism / hydrolase, acting on acid anhydrides, catalyzing transmembrane movement of substances / proton-transporting ATPase, rotational mechanism	K.SYTMLQSWPVR.T	2	1366.69	25.63	6.07312	1	1	0.86	1	5362209	5358240	1	0	14N
AT1G78900.1	VHA-A (VACUOLAR ATP SYNTHASE SUBUNIT A); ATP binding / hydrogen ion transporting ATP synthase, rotational mechanism / hydrolase, acting on acid anhydrides, catalyzing transmembrane movement of substances / proton-transporting ATPase, rotational mechanism	R.GNEMAEVLMDFPQ*LTMTLPDGREESVMK.R	3	3168.5	52.48	12.4666	1	1	0.93	1	3015860	3946839	0.76	0	14N
AT1G78900.1	VHA-A (VACUOLAR ATP SYNTHASE SUBUNIT A); ATP binding / hydrogen ion transporting ATP synthase, rotational mechanism / hydrolase, acting on acid anhydrides, catalyzing transmembrane movement of substances / proton-transporting ATPase, rotational mechanism	K.FVEGDTITGGDLYATVFENTLMN*HLVALPPDAMGK.I	3	3736.84	52.42	9.31276	1	1	0.92	1	6328345	8814256	0.72	0	14N
AT1G78900.1	VHA-A (VACUOLAR ATP SYNTHASE SUBUNIT A); ATP binding / hydrogen ion transporting ATP synthase, rotational mechanism / hydrolase, acting on acid anhydrides, catalyzing transmembrane movement of substances / proton-transporting ATPase, rotational mechanism	K.YSTALESFYEKFDPDFINIR.T	3	2454.2	31.97	7.13069	1	1	0.89	1	12755979	16044026	0.8	0	14N
AT1G78900.1	VHA-A (VACUOLAR ATP SYNTHASE SUBUNIT A); ATP binding / hydrogen ion transporting ATP synthase, rotational mechanism / hydrolase, acting on acid anhydrides, catalyzing transmembrane movement of substances / proton-transporting ATPase, rotational mechanism	K.FVEGDTITGGDLYATVFEN*TLMNHLVALPPDAMGK.I	3	3736.85	25.14	10.0888	1	1	0.92	1	6328345	8814256	0.72	0	14N
AT1G78900.1	VHA-A (VACUOLAR ATP SYNTHASE SUBUNIT A); ATP binding / hydrogen ion transporting ATP synthase, rotational mechanism / hydrolase, acting on acid anhydrides, catalyzing transmembrane movement of substances / proton-transporting ATPase, rotational mechanism	R.LGDLFYR.L	2	882.471	46.43	3.96615	1	1	0.96	1	4020615	7846360	0.51	0	14N
AT1G78900.1	VHA-A (VACUOLAR ATP SYNTHASE SUBUNIT A); ATP binding / hydrogen ion transporting ATP synthase, rotational mechanism / hydrolase, acting on acid anhydrides, catalyzing transmembrane movement of substances / proton-transporting ATPase, rotational mechanism	R.TTLVANTSNMPVAAR.E	2	1544.81	82.8	4.40185	1	1	0.98	1	9276197	8153437	1.14	0	15N
AT1G78900.1	VHA-A (VACUOLAR ATP SYNTHASE SUBUNIT A); ATP binding / hydrogen ion transporting ATP synthase, rotational mechanism / hydrolase, acting on acid anhydrides, catalyzing transmembrane movement of substances / proton-transporting ATPase, rotational mechanism	K.YSNSDAVVYVGCGER.G	2	1674.75	65.9	4.65744	1	1	0.94	1	2881379	2122015	1.36	0	15N
AT1G78900.1	VHA-A (VACUOLAR ATP SYNTHASE SUBUNIT A); ATP binding / hydrogen ion transporting ATP synthase, rotational mechanism / hydrolase, acting on acid anhydrides, catalyzing transmembrane movement of substances / proton-transporting ATPase, rotational mechanism	K.FEDPAEGEDTLVEK.F	2	1577.72	73.88	1.8381	2	2	0.93	1	3801337	3361565	1.13	0	15N
AT1G78900.1	VHA-A (VACUOLAR ATP SYNTHASE SUBUNIT A); ATP binding / hydrogen ion transporting ATP synthase, rotational mechanism / hydrolase, acting on acid anhydrides, catalyzing transmembrane movement of substances / proton-transporting ATPase, rotational mechanism	K.LTTFEDDEKESEYGYVR.K	3	2079.94	22.36	4.08667	1	1	0.86	1	1679373	3296585	0.51	0	15N
AT1G78900.1	VHA-A (VACUOLAR ATP SYNTHASE SUBUNIT A); ATP binding / hydrogen ion transporting ATP synthase, rotational mechanism / hydrolase, acting on acid anhydrides, catalyzing transmembrane movement of substances / proton-transporting ATPase, rotational mechanism	R.VGHDNLIGEIIR.L	3	1334.75	20.39	6.66797	1	1	0.99	1	12159854	10900434	1.12	0	15N
AT1G78900.1	VHA-A (VACUOLAR ATP SYNTHASE SUBUNIT A); ATP binding / hydrogen ion transporting ATP synthase, rotational mechanism / hydrolase, acting on acid anhydrides, catalyzing transmembrane movement of substances / proton-transporting ATPase, rotational mechanism	R.NIIHFYNLANQAVER.A	3	1800.95	47.76	5.66372	1	1	0.88	1	12038815	10083206	1.19	0	15N
AT1G78900.1	VHA-A (VACUOLAR ATP SYNTHASE SUBUNIT A); ATP binding / hydrogen ion transporting ATP synthase, rotational mechanism / hydrolase, acting on acid anhydrides, catalyzing transmembrane movement of substances / proton-transporting ATPase, rotational mechanism	K.DALAEGDKITLETAK.L	2	1573.84	66.9	4.70191	1	1	0.94	1	1577612	1647863	0.96	0	15N
AT1G78900.1	VHA-A (VACUOLAR ATP SYNTHASE SUBUNIT A); ATP binding / hydrogen ion transporting ATP synthase, rotational mechanism / hydrolase, acting on acid anhydrides, catalyzing transmembrane movement of substances / proton-transporting ATPase, rotational mechanism	K.LAADTPLLTGQR.V	2	1254.71	63.22	3.34741	1	1	0.94	1	7550411	7026230	1.07	0	15N
AT1G78900.1	VHA-A (VACUOLAR ATP SYNTHASE SUBUNIT A); ATP binding / hydrogen ion transporting ATP synthase, rotational mechanism / hydrolase, acting on acid anhydrides, catalyzing transmembrane movement of substances / proton-transporting ATPase, rotational mechanism	K.FVEGDTITGGDLYATVFENTLMN*HLVALPPDAMGK.I	3	3736.85	36.32	10.0888	2	2	0.88	1	11820822	10681994	1.11	0	15N
AT1G78900.1	VHA-A (VACUOLAR ATP SYNTHASE SUBUNIT A); ATP binding / hydrogen ion transporting ATP synthase, rotational mechanism / hydrolase, acting on acid anhydrides, catalyzing transmembrane movement of substances / proton-transporting ATPase, rotational mechanism	R.GNEMAEVLMDFPQLTMTLPDGR.E	2	2464.16	53.77	3.97703	1	1	0.95	1	1478785	1329493	1.11	0	15N
AT1G78900.1	VHA-A (VACUOLAR ATP SYNTHASE SUBUNIT A); ATP binding / hydrogen ion transporting ATP synthase, rotational mechanism / hydrolase, acting on acid anhydrides, catalyzing transmembrane movement of substances / proton-transporting ATPase, rotational mechanism	K.YSTALESFYEKFDPDFINIR.T	3	2454.2	50.18	6.84546	2	2	0.87	1	8322024	7301775	1.14	0	15N
AT1G78900.1	VHA-A (VACUOLAR ATP SYNTHASE SUBUNIT A); ATP binding / hydrogen ion transporting ATP synthase, rotational mechanism / hydrolase, acting on acid anhydrides, catalyzing transmembrane movement of substances / proton-transporting ATPase, rotational mechanism	K.FDPDFINIR.T	2	1135.58	32.09	6.60459	1	1	0.97	1	3774801	2484505	1.52	0	15N
AT1G78900.1	VHA-A (VACUOLAR ATP SYNTHASE SUBUNIT A); ATP binding / hydrogen ion transporting ATP synthase, rotational mechanism / hydrolase, acting on acid anhydrides, catalyzing transmembrane movement of substances / proton-transporting ATPase, rotational mechanism	K.ITYIAPAGQYSLK.D	2	1423.78	27	3.58202	1	1	0.92	1	4906114	4349055	1.13	0	15N
AT1G78900.1	VHA-A (VACUOLAR ATP SYNTHASE SUBUNIT A); ATP binding / hydrogen ion transporting ATP synthase, rotational mechanism / hydrolase, acting on acid anhydrides, catalyzing transmembrane movement of substances / proton-transporting ATPase, rotational mechanism	R.LAEMPADSGYPAYLAAR.L	2	1794.87	67.81	1.67143	2	2	0.97	1	13430477	11873169	1.13	0	15N
AT1G78900.1	VHA-A (VACUOLAR ATP SYNTHASE SUBUNIT A); ATP binding / hydrogen ion transporting ATP synthase, rotational mechanism / hydrolase, acting on acid anhydrides, catalyzing transmembrane movement of substances / proton-transporting ATPase, rotational mechanism	R.ISGDVYIPR.G	2	1018.56	52.22	3.43625	1	1	0.98	1	8371630	7056820	1.19	0	15N
AT1G78900.1	VHA-A (VACUOLAR ATP SYNTHASE SUBUNIT A); ATP binding / hydrogen ion transporting ATP synthase, rotational mechanism / hydrolase, acting on acid anhydrides, catalyzing transmembrane movement of substances / proton-transporting ATPase, rotational mechanism	R.THKPLSVELGPGILGNIFDGIQRPLK.T	4	2798.6	27.07	4.6452	1	1	0.82	1	12974210	12759142	1.02	0	15N
AT1G78900.1	VHA-A (VACUOLAR ATP SYNTHASE SUBUNIT A); ATP binding / hydrogen ion transporting ATP synthase, rotational mechanism / hydrolase, acting on acid anhydrides, catalyzing transmembrane movement of substances / proton-transporting ATPase, rotational mechanism	R.GNEMAEVLMDFPQLTMTLPDGREESVMK.R	3	3167.48	56.73	3.4728	2	2	0.85	1	5079128	5108686	0.99	0	15N
AT1G78900.1	VHA-A (VACUOLAR ATP SYNTHASE SUBUNIT A); ATP binding / hydrogen ion transporting ATP synthase, rotational mechanism / hydrolase, acting on acid anhydrides, catalyzing transmembrane movement of substances / proton-transporting ATPase, rotational mechanism	R.VLDALFPSVLGGTCAIPGAFGCGK.T	2	2406.23	53.38	7.1066	1	1	0.97	1	3118313	2920438	1.07	0	15N
AT1G78900.1	VHA-A (VACUOLAR ATP SYNTHASE SUBUNIT A); ATP binding / hydrogen ion transporting ATP synthase, rotational mechanism / hydrolase, acting on acid anhydrides, catalyzing transmembrane movement of substances / proton-transporting ATPase, rotational mechanism	R.LVSQKFEDPAEGEDTLVEK.F	3	2133.06	20.26	2.25029	1	1	0.96	1	3679087	3863258	0.95	0	15N
AT1G78900.1	VHA-A (VACUOLAR ATP SYNTHASE SUBUNIT A); ATP binding / hydrogen ion transporting ATP synthase, rotational mechanism / hydrolase, acting on acid anhydrides, catalyzing transmembrane movement of substances / proton-transporting ATPase, rotational mechanism	K.SYTMLQSWPVR.T	2	1366.68	42.75	4.31704	1	1	0.86	1	6141467	5317073	1.16	0	15N
AT1G78900.1	VHA-A (VACUOLAR ATP SYNTHASE SUBUNIT A); ATP binding / hydrogen ion transporting ATP synthase, rotational mechanism / hydrolase, acting on acid anhydrides, catalyzing transmembrane movement of substances / proton-transporting ATPase, rotational mechanism	K.ITYTLIK.H	2	850.528	31.5	3.76239	1	1	0.91	1	4558602	4660730	0.98	0	15N
AT1G78900.1	VHA-A (VACUOLAR ATP SYNTHASE SUBUNIT A); ATP binding / hydrogen ion transporting ATP synthase, rotational mechanism / hydrolase, acting on acid anhydrides, catalyzing transmembrane movement of substances / proton-transporting ATPase, rotational mechanism	K.YSTALESFYEK.F	2	1336.63	39.65	4.18965	1	1	0.84	1	2849594	2691302	1.06	0	15N
AT1G78900.1	VHA-A (VACUOLAR ATP SYNTHASE SUBUNIT A); ATP binding / hydrogen ion transporting ATP synthase, rotational mechanism / hydrolase, acting on acid anhydrides, catalyzing transmembrane movement of substances / proton-transporting ATPase, rotational mechanism	R.LGDLFYR.L	2	882.473	34.64	5.77925	1	1	0.93	1	4811243	6303874	0.76	0	15N
AT1G79210.1	20S proteasome alpha subunit B, putative	R.VLTPAEIDDYLAEVE.-	2	1675.83	34.23	2.68524	1	1	0.99	2	3666025	3058971	1.2	0	15N
AT1G79330.1	ATMC5 (ARABIDOPSIS THALIANA METACASPASE 5); cysteine-type endopeptidase	K.AVLIGINYPGTK.A	2	1244.73	32.36	3.53493	1	1	0.89	2	1485057	1873017	0.79	0	15N
AT1G79330.1	ATMC5 (ARABIDOPSIS THALIANA METACASPASE 5); cysteine-type endopeptidase	K.SLPLQTLIDILK.Q	2	1352.85	47.34	9.53553	1	1	0.97	2	4550486	3077888	1.48	0	15N
AT1G79340.1	AtMC4 (metacaspase 4); cysteine-type peptidase	K.IRPSLFDAFGDDSSPK.V	3	1750.87	31.25	4.05515	1	1	0.94	1	3357312	2790889	1.2	0	15N
AT1G79440.1	ALDH5F1; 3-chloroallyl aldehyde dehydrogenase/ NAD or NADH binding / succinate-semialdehyde dehydrogenase	R.IANDTIAGLAAYIFTNSVQR.S	3	2137.14	23.93	7.95461	1	1	0.83	1	1111788	2053504	0.54	0	14N
AT1G79440.1	ALDH5F1; 3-chloroallyl aldehyde dehydrogenase/ NAD or NADH binding / succinate-semialdehyde dehydrogenase	R.IANDTIAGLAAYIFTNSVQR.S	3	2137.15	35.54	11.23	1	1	0.81	1	1504830	1861045	0.81	0	15N
AT1G79530.1	GAPCP-1 (GLYCERALDEHYDE-3-PHOSPHATE DEHYDROGENASE OF PLASTID 1); NAD or NADH binding / binding / catalytic/ glyceraldehyde-3-phosphate dehydrogenase (phosphorylating)/ glyceraldehyde-3-phosphate dehydrogenase	K.GILGYTDEDVVSNDFVGDSR.S	2	2157	89.92	4.63608	1	1	0.9	1	1969662	2010406	0.98	0	14N
AT1G79530.1	GAPCP-1 (GLYCERALDEHYDE-3-PHOSPHATE DEHYDROGENASE OF PLASTID 1); NAD or NADH binding / binding / catalytic/ glyceraldehyde-3-phosphate dehydrogenase (phosphorylating)/ glyceraldehyde-3-phosphate dehydrogenase	R.VPTSNVSVVDLTCR.L	2	1545.79	43.28	2.13483	1	1	0.93	1	1693169	2322857	0.73	0	14N
AT1G79530.1	GAPCP-1 (GLYCERALDEHYDE-3-PHOSPHATE DEHYDROGENASE OF PLASTID 1); NAD or NADH binding / binding / catalytic/ glyceraldehyde-3-phosphate dehydrogenase (phosphorylating)/ glyceraldehyde-3-phosphate dehydrogenase	R.VLDLIEHMALVAASH.-	3	1617.88	27.5	8.28253	1	1	0.59	1	11805848	6961291	1.7	0	14N
AT1G79530.1	GAPCP-1 (GLYCERALDEHYDE-3-PHOSPHATE DEHYDROGENASE OF PLASTID 1); NAD or NADH binding / binding / catalytic/ glyceraldehyde-3-phosphate dehydrogenase (phosphorylating)/ glyceraldehyde-3-phosphate dehydrogenase	K.GILGYTDEDVVSNDFVGDSR.S	2	2157.01	79.24	5.19241	1	1	0.96	1	2704572	2458481	1.1	0	15N
AT1G79530.1	GAPCP-1 (GLYCERALDEHYDE-3-PHOSPHATE DEHYDROGENASE OF PLASTID 1); NAD or NADH binding / binding / catalytic/ glyceraldehyde-3-phosphate dehydrogenase (phosphorylating)/ glyceraldehyde-3-phosphate dehydrogenase	R.VPTSNVSVVDLTCR.L	2	1545.79	61.43	2.13483	1	1	0.94	1	2525209	2144183	1.18	0	15N
AT1G79550.1	PGK (PHOSPHOGLYCERATE KINASE); phosphoglycerate kinase	K.YSLKPLVPR.L	3	1071.66	26.21	7.09186	2	2	0.96	1	19774421	24552228	0.81	0	14N
AT1G79550.1	PGK (PHOSPHOGLYCERATE KINASE); phosphoglycerate kinase	K.LVAGLPEGGVLLLENVR.F	2	1748.04	81.08	6.00677	5	5	0.95	1	30049968	38859618	0.766	0.00547723	14N
AT1G79550.1	PGK (PHOSPHOGLYCERATE KINASE); phosphoglycerate kinase	K.TFSEALDTTK.T	2	1111.55	48.34	2.7889	1	1	0.95	1	7259800	6642053	1.09	0	14N
AT1G79550.1	PGK (PHOSPHOGLYCERATE KINASE); phosphoglycerate kinase	K.MSHISTGGGASLELLEGKPLPGVLALDEA.-	3	2862.5	28.64	0.120706	2	2	0.81	1	18730634	24200397	0.69	0.113137	14N
AT1G79550.1	PGK (PHOSPHOGLYCERATE KINASE); phosphoglycerate kinase	R.VDLNVPLDDNSNITDDTR.I	2	2014.96	71.34	4.71475	2	2	0.85	1	16160647	18875525	0.86	0	14N
AT1G79550.1	PGK (PHOSPHOGLYCERATE KINASE); phosphoglycerate kinase	K.IGVIESLLNTVDILLLGGGMIFTFYK.A	3	2825.58	48.3	1.69877	5	5	0.96	1	6875676	8152741	0.842	0.00447214	14N
AT1G79550.1	PGK (PHOSPHOGLYCERATE KINASE); phosphoglycerate kinase	K.FLKPSVAGFLMQK.E	3	1464.83	33.83	6.21235	1	1	0.98	1	25117572	32549586	0.77	0	14N
AT1G79550.1	PGK (PHOSPHOGLYCERATE KINASE); phosphoglycerate kinase	K.IVPATAIPDGWMGLDIGPDSIK.T	2	2265.19	64.9	4.28222	4	4	0.91	1	15778502	21546920	0.74	0.02	14N
AT1G79550.1	PGK (PHOSPHOGLYCERATE KINASE); phosphoglycerate kinase	K.ELDYLVGAVANPK.K	2	1387.75	86.25	7.71036	2	2	0.91	1	11275282	15307285	0.74	0	14N
AT1G79550.1	PGK (PHOSPHOGLYCERATE KINASE); phosphoglycerate kinase	K.MSHISTGGGASLELLEGKPLPGVLALDEA.-	3	2861.5	24.46	1.67745	1	1	0.83	1	26276541	21927333	1.2	0	15N
AT1G79550.1	PGK (PHOSPHOGLYCERATE KINASE); phosphoglycerate kinase	K.IGVIESLLN*TVDILLLGGGM#IFTFYK.A	3	2844.59	26.74	10.0581	1	1	0.38	1	112416	159050	0.71	0	15N
AT1G79550.1	PGK (PHOSPHOGLYCERATE KINASE); phosphoglycerate kinase	R.FYAEEEKNDPEFAK.K	2	1715.78	39.93	2.73929	1	1	0.97	1	634766	470769	1.35	0	15N
AT1G79550.1	PGK (PHOSPHOGLYCERATE KINASE); phosphoglycerate kinase	K.FLKPSVAGFLMQK.E	3	1464.83	36.83	7.23636	3	3	0.95	1	45465998	40324778	1.13	0	15N
AT1G79550.1	PGK (PHOSPHOGLYCERATE KINASE); phosphoglycerate kinase	K.TIIWNGPMGVFEFDK.F	2	1752.87	44.09	6.2184	1	1	0.92	1	5342514	4328094	1.23	0	15N
AT1G79550.1	PGK (PHOSPHOGLYCERATE KINASE); phosphoglycerate kinase	K.ELDYLVGAVANPK.K	2	1387.75	79.36	4.90004	2	2	0.95	1	16985240	13797791	1.23	0	15N
AT1G79550.1	PGK (PHOSPHOGLYCERATE KINASE); phosphoglycerate kinase	K.YSLKPLVPR.L	3	1071.66	28.98	4.75901	2	2	0.96	1	23266496	19544969	1.19	0	15N
AT1G79550.1	PGK (PHOSPHOGLYCERATE KINASE); phosphoglycerate kinase	K.LVAGLPEGGVLLLENVR.F	2	1748.04	80.7	4.57659	5	5	0.97	1	41466746	34687857	1.236	0.049295	15N
AT1G79550.1	PGK (PHOSPHOGLYCERATE KINASE); phosphoglycerate kinase	R.VDLNVPLDDNSNITDDTR.I	2	2014.96	77.92	3.87106	2	2	0.94	1	19871272	14497730	1.37	0	15N
AT1G79550.1	PGK (PHOSPHOGLYCERATE KINASE); phosphoglycerate kinase	K.TIIWNGPMGVFEFDKFAAGTEAVAK.Q	3	2698.37	21.3	5.85542	1	1	0.93	1	12323582	10099718	1.22	0	15N
AT1G79550.1	PGK (PHOSPHOGLYCERATE KINASE); phosphoglycerate kinase	K.IGVIESLLNTVDILLLGGGMIFTFYK.A	3	2827.58	48.83	0.173699	6	6	0.92	1	5034672	4786708	1.09333	0.106145	15N
AT1G79550.1	PGK (PHOSPHOGLYCERATE KINASE); phosphoglycerate kinase	K.IVPATAIPDGWMGLDIGPDSIK.T	2	2265.19	71.58	3.9732	3	3	0.94	1	28709847	21206605	1.35	0	15N
AT1G79690.1	atnudt3 (Arabidopsis thaliana Nudix hydrolase homolog 3); hydrolase	K.FINNEFNDVYLVTILHPIPLEAFTLQ*K.E	3	3188.72	24.54	8.90649	1	1	0.81	1	1377326	1672108	0.82	0	15N
AT1G79750.1	ATNADP-ME4 (NADP-malic enzyme 4); malate dehydrogenase (oxaloacetate-decarboxylating) (NADP+)/ malic enzyme/ oxidoreductase, acting on NADH or NADPH, NAD or NADP as acceptor	R.ILGLGDLGCQGMGIPVGK.L	2	1783.95	58.62	6.50246	3	3	0.94	4	14047858	36221055	0.39	9.12506e-09	14N
AT1G79750.1	ATNADP-ME4 (NADP-malic enzyme 4); malate dehydrogenase (oxaloacetate-decarboxylating) (NADP+)/ malic enzyme/ oxidoreductase, acting on NADH or NADPH, NAD or NADP as acceptor	R.ILGLGDLGCQGMGIPVGK.L	2	1783.95	74.1	3.19517	3	3	0.97	4	17875047	10763479	1.66	0	15N
AT1G79870.1	oxidoreductase family protein	R.VTN*TPDVLTEDVADLAIGLILALLR.R	3	2635.5	38.34	8.49941	1	1	0.82	1	1051042	1719714	0.61	0	14N
AT1G79870.1	oxidoreductase family protein	R.VTN*TPDVLTEDVADLAIGLILALLR.R	3	2635.51	39.78	11.497	2	2	0.77	1	1596805	2057574	0.78	0	15N
AT1G79870.1	oxidoreductase family protein	R.VTNTPDVLTEDVADLAIGLILALLR.R	2	2636.49	64.72	-1.78752	2	2	0.81	1	2224703	2243110	1.06	0.0989949	15N
AT1G79920.1	ATP binding	R.FIGTAGAASTMMNPK.N	2	1495.73	49.58	6.08401	1	1	0.98	4	1928872	2293631	0.84	0	14N
AT1G79920.1	ATP binding	R.AFTPTQVMGMMLSNLK.G	3	1767.89	32.06	7.74939	1	1	0.89	4	2221752	2948530	0.75	0	14N
AT1G79920.1	ATP binding	K.YATPALLSADVK.S	2	1247.69	30.33	4.32802	1	1	0.94	4	1406686	1912800	0.74	0	14N
AT1G79920.1	ATP binding	K.YATPALLSADVK.S	2	1247.69	42.22	4.80891	1	1	0.94	4	1412825	1364140	1.04	0	15N
AT1G79920.1	ATP binding	K.TNVPLSELVYGALK.T	2	1502.84	40.18	1.13119	1	1	0.97	4	1831972	4222745	0.43	0	15N
AT1G79920.1	ATP binding	R.FIGTAGAASTMMNPK.N	2	1495.73	46.64	5.48229	1	1	0.97	4	2308154	1652776	1.4	0	15N
AT1G79920.1	ATP binding	R.AFTPTQVMGMMLSNLK.G	2	1767.89	51.05	8.14535	3	3	0.91	4	2547394	2704438	1.04	0.0866025	15N
AT1G79920.1	ATP binding	K.FDHIELAEK.Q	3	1101.56	22.99	-4.86535	1	1	0.95	4	1491850	907646	1.64	0	15N
AT1G80050.1	APT2 (ADENINE PHOSPHORIBOSYL TRANSFERASE 2); adenine phosphoribosyltransferase/ phosphate transmembrane transporter	R.GFIFGPPIALAIGAK.F	2	1470.88	38.08	8.29442	2	2	0.89	3	6324688	8166500	0.77	0	14N
AT1G80300.1	NTT1 (NUCLEOTIDE TRANSPORTER 1); ATP:ADP antiporter	K.LGMTPLLAAVYVGALQNIFSK.S	3	2205.24	21.57	6.25785	1	1	0.8	2	528791	703028	0.75	0	14N
AT1G80360.1	aminotransferase class I and II family protein	R.SLMAELTNPMSLAQGVVHWQPPQK.A	3	2661.36	22.2	4.47142	1	1	0.6	1	2072325	2413794	0.86	0	15N
AT1G80410.1	EMB2753 (EMBRYO DEFECTIVE 2753); binding	K.VVQTNEALGQAR.E	2	1284.69	38.93	3.65848	1	1	0.8	1	126819	235266	0.54	0	15N
AT1G80460.1	NHO1 (nonhost resistance to P. s. phaseolicola 1); carbohydrate kinase/ glycerol kinase	K.LLWLMENVDDVKDAIK.K	3	1901.02	21.49	6.31245	1	1	0.9	2	2695052	2203689	1.22	0	15N
AT1G80660.1	AHA9; hydrogen-exporting ATPase, phosphorylative mechanism	R.LLDGDPLKIDQSALTGESLPVTK.H	3	2409.32	32.24	6.84844	1	1	0.94	1	7363162	8587634	0.86	0	14N
AT1G80660.1	AHA9; hydrogen-exporting ATPase, phosphorylative mechanism	K.MITGDQLAIGK.E	2	1145.62	40.78	4.71361	1	1	0.87	8	4907629	5891065	0.83	0	14N
AT1G80660.1	AHA9; hydrogen-exporting ATPase, phosphorylative mechanism	R.LLDGDPLKIDQSALTGESLPVTK.H	3	2409.32	29.81	3.6525	2	2	0.95	1	12915155	9993043	1.29	0	15N
AT1G80660.1	AHA9; hydrogen-exporting ATPase, phosphorylative mechanism	K.ADGFAGVFPEHK.Y	2	1273.62	29.82	1.72736	1	1	0.71	12	1815244	1144783	1.59	0	15N
AT1G80660.1	AHA9; hydrogen-exporting ATPase, phosphorylative mechanism	K.MITGDQLAIGK.E	2	1145.63	32.9	5.49921	1	1	0.95	8	6501875	4619466	1.41	0	15N
AT2G01140.1	fructose-bisphosphate aldolase, putative	R.TVVSVPCGPSALAVK.E	2	1483.82	24.84	3.63927	1	1	0.95	1	6596668	9494109	0.69	0	14N
AT2G01140.1	fructose-bisphosphate aldolase, putative	R.LASIGLDNTEDNR.Q	2	1416.7	57.73	2.82348	1	1	0.96	1	4781670	6209254	0.77	0	14N
AT2G01140.1	fructose-bisphosphate aldolase, putative	K.GLSPLAGSNEESWCQGLDGLASR.S	2	2403.13	76.3	4.32771	1	1	0.91	1	3356862	4304906	0.78	0	14N
AT2G01140.1	fructose-bisphosphate aldolase, putative	R.YAAISQDNGLVPIVEPEILLDGDHPIER.T	3	3073.61	35.56	5.87304	1	1	0.86	1	13794989	19452647	0.71	0	14N
AT2G01140.1	fructose-bisphosphate aldolase, putative	R.YAAISQDN*GLVPIVEPEILLDGDHPIER.T	3	3073.61	23.48	12.1683	1	1	0.92	1	11244699	18316010	0.61	0	14N
AT2G01140.1	fructose-bisphosphate aldolase, putative	R.DANIVPGIK.V	2	925.538	23.55	6.91495	1	1	0.86	1	1439442	1511518	0.95	0	15N
AT2G01140.1	fructose-bisphosphate aldolase, putative	R.LASIGLDNTEDNR.Q	2	1416.7	75.14	2.61172	1	1	0.98	1	8938018	6953137	1.29	0	15N
AT2G01140.1	fructose-bisphosphate aldolase, putative	R.GILAIDESNATCGK.R	2	1447.71	61.1	2.48669	1	1	0.96	1	2053654	1754792	1.17	0	15N
AT2G01140.1	fructose-bisphosphate aldolase, putative	R.YAAISQDN*GLVPIVEPEILLDGDHPIER.T	3	3073.59	28.97	7.45062	1	1	0.75	1	4898950	5992615	0.82	0	15N
AT2G01140.1	fructose-bisphosphate aldolase, putative	R.TVVSVPCGPSALAVK.E	2	1483.82	23.95	2.02182	1	1	0.98	1	8981338	6327701	1.42	0	15N
AT2G01140.1	fructose-bisphosphate aldolase, putative	K.GLSPLAGSNEESWCQGLDGLASR.S	2	2403.13	99.96	3.74513	1	1	0.94	1	5546576	4389108	1.26	0	15N
AT2G01140.1	fructose-bisphosphate aldolase, putative	R.YAAISQDNGLVPIVEPEILLDGDHPIER.T	3	3072.6	40.56	5.79317	3	3	0.96	1	17492106	15274863	1.15	0	15N
AT2G01250.1	60S ribosomal protein L7 (RPL7B)	K.HGIICTEDLIHEILTVGPHFK.E	4	2428.28	42.13	4.40644	2	2	0.61	1	7190991	8610633	0.84	0	14N
AT2G01250.1	60S ribosomal protein L7 (RPL7B)	R.RVEPYVTYGFPNLK.S	3	1681.9	22.93	5.70786	1	1	0.9	2	3040096	4063749	0.75	0	14N
AT2G01250.1	60S ribosomal protein L7 (RPL7B)	R.IALTDNSIVEQALGK.H	2	1570.88	64.15	7.38447	1	1	0.91	1	5608861	7880494	0.71	0	14N
AT2G01250.1	60S ribosomal protein L7 (RPL7B)	K.HGIICTEDLIHEILTVGPHFK.E	4	2428.28	36.31	7.94806	3	3	0.84	1	7248122	6024304	1.2	0	15N
AT2G01250.1	60S ribosomal protein L7 (RPL7B)	R.RVEPYVTYGFPNLK.S	3	1681.9	24.12	4.57818	1	1	0.92	2	3930251	3719427	1.06	0	15N
AT2G01250.1	60S ribosomal protein L7 (RPL7B)	R.IALTDNSIVEQALGK.H	2	1570.88	66.92	7.32081	1	1	0.95	1	8889885	7485174	1.19	0	15N
AT2G01520.1	MLP328 (MLP-LIKE PROTEIN 328); copper ion binding	K.IWNYTCDGKPEVFK.E	2	1755.85	68.69	5.01186	5	5	0.94	2	180983668	314803691	0.582	0.0164317	14N
AT2G01520.1	MLP328 (MLP-LIKE PROTEIN 328); copper ion binding	K.SLAADMDDHVLKA.-	2	1384.68	60.75	3.17764	8	8	0.97	1	44463855	86094498	0.53875	0.0164208	14N
AT2G01520.1	MLP328 (MLP-LIKE PROTEIN 328); copper ion binding	R.GLEGHVMEQLK.V	2	1239.64	61.55	5.00147	4	4	0.9	5	77306546	135918853	0.57	0	14N
AT2G01520.1	MLP328 (MLP-LIKE PROTEIN 328); copper ion binding	K.QNDDMPEPSNYMK.F	2	1567.64	61.78	2.42403	3	3	0.99	1	81353353	146593583	0.55	0	14N
AT2G01520.1	MLP328 (MLP-LIKE PROTEIN 328); copper ion binding	K.Q*NDDMPEPSNYMK.F	2	1570.65	36.93	16.888	1	1	0.99	1	40362737	145304108	0.28	0	14N
AT2G01520.1	MLP328 (MLP-LIKE PROTEIN 328); copper ion binding	R.EIDDENMAVTFR.G	2	1438.65	53.12	2.91941	4	4	0.86	1	93002194	166186849	0.56	0	14N
AT2G01520.1	MLP328 (MLP-LIKE PROTEIN 328); copper ion binding	K.VYDVIFQFIQK.S	2	1398.77	77.66	8.6505	12	12	0.73	1	253438391	462354778	0.561667	0.022088	14N
AT2G01520.1	MLP328 (MLP-LIKE PROTEIN 328); copper ion binding	R.REIDDENMAVTFR.G	2	1594.75	42.92	0.564352	2	2	0.87	1	3487769	6148765	0.56	0.0141421	14N
AT2G01520.1	MLP328 (MLP-LIKE PROTEIN 328); copper ion binding	K.QNDDM#PEPSNYMK.F	2	1583.63	27.4	2.3364	1	1	0.91	1	806531	1118113	0.72	0	14N
AT2G01520.1	MLP328 (MLP-LIKE PROTEIN 328); copper ion binding	K.QNDDMPEPSNYM#K.F	2	1583.64	32.8	5.05168	1	1	0.98	1	1019498	1629536	0.63	0	14N
AT2G01520.1	MLP328 (MLP-LIKE PROTEIN 328); copper ion binding	K.IWNYTCDGKPEVFK.E	2	1755.84	68.59	2.73374	4	4	0.95	2	14344761	6977305	1.595	0.31	15N
AT2G01520.1	MLP328 (MLP-LIKE PROTEIN 328); copper ion binding	K.SLAADMDDHVLKA.-	2	1384.68	72.57	2.45545	9	9	0.92	1	81663219	43959559	1.70444	0.184466	15N
AT2G01520.1	MLP328 (MLP-LIKE PROTEIN 328); copper ion binding	R.GLEGHVMEQLK.V	2	1239.64	62.39	2.25873	5	5	0.95	5	124397448	82145440	1.51	0	15N
AT2G01520.1	MLP328 (MLP-LIKE PROTEIN 328); copper ion binding	R.GLEGHVM#EQLK.V	2	1255.63	34.22	2.22995	1	1	0.93	5	868555	461545	1.88	0	15N
AT2G01520.1	MLP328 (MLP-LIKE PROTEIN 328); copper ion binding	R.EIDDENM#AVTFR.G	2	1454.66	33.02	10.9305	1	1	0.9	1	2350707	1029896	2.28	0	15N
AT2G01520.1	MLP328 (MLP-LIKE PROTEIN 328); copper ion binding	K.ITMIWEK.Q	2	919.496	23.84	5.22028	1	1	0.88	5	262017568	226720014	1.16	0	15N
AT2G01520.1	MLP328 (MLP-LIKE PROTEIN 328); copper ion binding	K.VYDVIFQFIQK.S	2	1398.77	86.64	5.71934	13	13	0.8	1	365728175	240621078	1.67615	0.267256	15N
AT2G01520.1	MLP328 (MLP-LIKE PROTEIN 328); copper ion binding	R.REIDDENMAVTFR.G	2	1594.75	55.3	0.940587	5	5	0.95	1	45094594	24069719	1.83	0.0547723	15N
AT2G01520.1	MLP328 (MLP-LIKE PROTEIN 328); copper ion binding	K.QNDDM#PEPSNYMK.F	2	1583.64	53	2.96786	1	1	0.85	1	1871072	903920	2.07	0	15N
AT2G01520.1	MLP328 (MLP-LIKE PROTEIN 328); copper ion binding	K.QNDDMPEPSNYMK.F	2	1567.64	56.9	2.80677	6	6	0.99	1	143995692	83855068	1.72	2.6656e-08	15N
AT2G01520.1	MLP328 (MLP-LIKE PROTEIN 328); copper ion binding	R.EIDDENMAVTFR.G	2	1438.65	67.59	4.37911	5	5	0.9	1	153816853	91578392	1.68	0	15N
AT2G01520.1	MLP328 (MLP-LIKE PROTEIN 328); copper ion binding	K.SLAADMDDHVLK.A	2	1313.64	44.68	1.59862	1	1	0.93	1	2452059	1267044	1.94	0	15N
AT2G01520.1	MLP328 (MLP-LIKE PROTEIN 328); copper ion binding	R.SENHLFPDAIGHHIQGVTIHDGEWDSHGAIK.I	6	3416.66	31.54	5.7659	6	6	0.96	1	72798667	34749395	1.88	0.226804	15N
AT2G01520.1	MLP328 (MLP-LIKE PROTEIN 328); copper ion binding	K.QNDDMPEPSNYM#K.F	2	1583.64	42.12	3.72562	1	1	0.97	1	1468389	690809	2.13	0	15N
AT2G01530.1	MLP329 (MLP-LIKE PROTEIN 329); copper ion binding	R.TDDSPEPSNYMK.F	2	1382.58	58.67	4.48439	3	3	0.98	1	7814791	8170472	0.96	0	14N
AT2G01530.1	MLP329 (MLP-LIKE PROTEIN 329); copper ion binding	K.VYDLIYQFSQK.S	2	1402.73	67.56	7.98448	3	3	0.95	1	23990836	25216249	0.95	1.49012e-08	14N
AT2G01530.1	MLP329 (MLP-LIKE PROTEIN 329); copper ion binding	K.SVVADMDEHVLKA.-	2	1412.71	77.52	2.47752	1	1	0.93	1	6449824	6340466	1.02	0	14N
AT2G01530.1	MLP329 (MLP-LIKE PROTEIN 329); copper ion binding	K.ITMIWEKR.T	3	1075.6	25.44	5.76426	1	1	0.93	4	22495171	25050301	0.9	0	14N
AT2G01530.1	MLP329 (MLP-LIKE PROTEIN 329); copper ion binding	K.EIDDENMVITFR.G	2	1480.71	34.96	8.8472	1	1	0.92	1	3479969	3308872	1.05	0	14N
AT2G01530.1	MLP329 (MLP-LIKE PROTEIN 329); copper ion binding	K.RTDDSPEPSNYMK.F	2	1538.68	40.12	0.714901	1	1	0.98	1	317832	312104	1.02	0	14N
AT2G01530.1	MLP329 (MLP-LIKE PROTEIN 329); copper ion binding	R.TDDSPEPSNYMK.F	2	1382.58	49.31	2.24219	1	1	0.99	1	9923121	6515093	1.52	0	15N
AT2G01530.1	MLP329 (MLP-LIKE PROTEIN 329); copper ion binding	K.RTDDSPEPSNYMK.F	2	1538.68	44.63	2.8596	1	1	0.96	1	348246	234235	1.49	0	15N
AT2G01530.1	MLP329 (MLP-LIKE PROTEIN 329); copper ion binding	K.VYDLIYQFSQK.S	2	1402.73	82.28	5.48933	3	3	0.9	1	29838647	19427339	1.53	0.0173205	15N
AT2G01530.1	MLP329 (MLP-LIKE PROTEIN 329); copper ion binding	K.SVVADMDEHVLKA.-	2	1412.71	58.82	5.6629	2	2	0.96	1	22030376	15585334	1.64	0.325269	15N
AT2G01530.1	MLP329 (MLP-LIKE PROTEIN 329); copper ion binding	K.EIDDENMVITFR.G	2	1480.7	29.09	4.25476	1	1	0.8	1	4877711	2884009	1.69	0	15N
AT2G02000.1	GAD3 (glutamate decarboxylase 3); calmodulin binding	K.GSSQVIAQYYQLIR.L	2	1624.87	74.43	5.04657	1	1	0.84	3	3212749	5027507	0.64	0	14N
AT2G02000.1	GAD3 (glutamate decarboxylase 3); calmodulin binding	K.GSSQVIAQYYQLIR.L	2	1624.87	77.63	5.04657	1	1	0.9	3	6142946	5788200	1.06	0	15N
AT2G02000.1	GAD3 (glutamate decarboxylase 3); calmodulin binding	K.LLNDLLVEK.N	2	1055.64	37.1	5.21016	1	1	0.92	3	8417922	5547281	1.52	0	15N
AT2G02010.1	GAD4 (glutamate decarboxylase 4); calmodulin binding	K.EAAYQIINDELMLDGNPR.L	2	2061	73.51	4.07571	2	2	0.86	2	3411447	3739354	0.64	0.381838	14N
AT2G02010.1	GAD4 (glutamate decarboxylase 4); calmodulin binding	K.EAAYQIINDELMLDGNPR.L	2	2061	76.04	3.5905	1	1	0.95	2	4216766	8018075	0.53	0	15N
AT2G02280.1	AtPP2-B4 (Phloem protein 2-B4); carbohydrate binding	-.M#NTQILSQ*K.T	2	1078.54	25.02	-0.927179	1	1	0.91	1	618695	899466	0.69	0	14N
AT2G02930.1	ATGSTF3 (GLUTATHIONE S-TRANSFERASE F3); glutathione transferase	R.NPFGQVPAFEDGDLKLFESR.A	3	2265.13	25.71	7.63758	1	1	0.91	2	7809460	11112194	0.7	0	14N
AT2G02930.1	ATGSTF3 (GLUTATHIONE S-TRANSFERASE F3); glutathione transferase	R.AITQYIAHR.Y	2	1071.59	32.23	4.10605	1	1	0.95	2	447079	623543	0.72	0	14N
AT2G02930.1	ATGSTF3 (GLUTATHIONE S-TRANSFERASE F3); glutathione transferase	R.NPFGQVPAFEDGDLK.L	2	1632.79	29.8	5.08334	2	2	0.94	2	9060280	11490631	0.79	0	14N
AT2G02930.1	ATGSTF3 (GLUTATHIONE S-TRANSFERASE F3); glutathione transferase	K.NLDFELVHVELK.D	2	1454.79	51.81	5.08666	1	1	0.85	2	10021303	4972931	2.02	0	15N
AT2G02930.1	ATGSTF3 (GLUTATHIONE S-TRANSFERASE F3); glutathione transferase	R.AITQYIAHR.Y	2	1071.6	34.11	5.3192	1	1	0.73	2	1041163	1573212	0.66	0	15N
AT2G02930.1	ATGSTF3 (GLUTATHIONE S-TRANSFERASE F3); glutathione transferase	R.NPFGQVPAFEDGDLK.L	2	1632.8	54.61	5.38956	2	2	0.99	2	24852981	9056067	2.74	0	15N
AT2G02930.1	ATGSTF3 (GLUTATHIONE S-TRANSFERASE F3); glutathione transferase	R.VNEWVAEITK.R	2	1187.63	49.76	3.28386	1	1	0.96	2	14291392	6096671	2.34	0	15N
AT2G04170.1	meprin and TRAF homology domain-containing protein / MATH domain-containing protein	K.VTFISNPPNNVFTWK.I	2	1762.92	44.21	6.0695	1	1	0.96	6	17221115	10598880	1.62	0	15N
AT2G04780.1	FLA7 (FASCICLIN-LIKE ARABINOOGALACTAN 7)	K.VSSSVFSTDPVAVYQVNR.V	2	1953.99	61.66	2.30298	1	1	0.94	1	2807864	3138471	0.89	0	14N
AT2G04780.1	FLA7 (FASCICLIN-LIKE ARABINOOGALACTAN 7)	K.VSSSVFSTDPVAVYQVNR.V	2	1954	60.23	5.52716	1	1	0.95	1	3721070	3426532	1.09	0	15N
AT2G05220.1	40S ribosomal protein S17 (RPS17B)	K.ILEEVAIIPSKR.L	3	1366.84	21.35	8.48681	1	1	0.93	4	6047172	7873850	0.77	0	14N
AT2G05710.1	aconitate hydratase, cytoplasmic, putative / citrate hydro-lyase/aconitase, putative	K.QVEIPFKPAR.V	3	1183.68	26.16	4.05515	1	1	0.95	2	4573345	5304596	0.86	0	14N
AT2G05710.1	aconitate hydratase, cytoplasmic, putative / citrate hydro-lyase/aconitase, putative	R.VDKLPYSIR.I	3	1089.63	27.64	5.69003	1	1	0.98	1	3061316	4092387	0.75	0	14N
AT2G05710.1	aconitate hydratase, cytoplasmic, putative / citrate hydro-lyase/aconitase, putative	R.N*GVTATDLVLTVTQMLR.K	2	1832.99	57.11	5.86546	1	1	0.88	1	1478859	2549140	0.58	0	14N
AT2G05710.1	aconitate hydratase, cytoplasmic, putative / citrate hydro-lyase/aconitase, putative	R.VLLQDFTGVPAVVDLACMR.D	2	2103.1	61.69	4.08921	3	3	0.93	2	6617570	8905041	0.763333	0.0404145	14N
AT2G05710.1	aconitate hydratase, cytoplasmic, putative / citrate hydro-lyase/aconitase, putative	K.LSVFDAAMR.Y	2	1008.51	33.74	-0.793246	1	1	0.8	1	4173853	6357273	0.66	0	14N
AT2G05710.1	aconitate hydratase, cytoplasmic, putative / citrate hydro-lyase/aconitase, putative	R.SDETVAMIEAYLR.A	2	1496.73	48.37	4.94413	1	1	0.9	1	2252539	2532898	0.89	0	14N
AT2G05710.1	aconitate hydratase, cytoplasmic, putative / citrate hydro-lyase/aconitase, putative	R.DIWPTTEEIAEVVQSSVLPDMFR.A	3	2661.32	24.29	6.01208	1	1	0.97	1	5821474	7261687	0.8	0	14N
AT2G05710.1	aconitate hydratase, cytoplasmic, putative / citrate hydro-lyase/aconitase, putative	K.WGSTAFQNMLVVPPGSGIVHQVNLEYLGR.V	3	3168.64	42.07	4.76547	4	4	0.78	2	12422386	14987370	0.83	0	14N
AT2G05710.1	aconitate hydratase, cytoplasmic, putative / citrate hydro-lyase/aconitase, putative	K.SGEDADTLGLTGHER.Y	2	1556.72	34.97	3.27613	1	1	0.92	1	446152	522218	0.85	0	14N
AT2G05710.1	aconitate hydratase, cytoplasmic, putative / citrate hydro-lyase/aconitase, putative	R.NGVTATDLVLTVTQMLR.K	3	1831.01	38.99	10.0492	1	1	0.82	1	998843	1213812	0.82	0	14N
AT2G05710.1	aconitate hydratase, cytoplasmic, putative / citrate hydro-lyase/aconitase, putative	R.ATIANMSPEYGATMGFFPVDHVTLQYLK.L	3	3100.54	25.11	9.45005	1	1	0.9	1	8361894	7926232	1.05	0	14N
AT2G05710.1	aconitate hydratase, cytoplasmic, putative / citrate hydro-lyase/aconitase, putative	R.ILLESAIR.N	2	913.573	38.45	6.02035	2	2	0.97	3	11673934	14692126	0.79	0	14N
AT2G05710.1	aconitate hydratase, cytoplasmic, putative / citrate hydro-lyase/aconitase, putative	R.SNLVGMGIIPLCFK.S	2	1547.84	48.37	7.30055	1	1	0.91	3	5175642	7639665	0.68	0	14N
AT2G05710.1	aconitate hydratase, cytoplasmic, putative / citrate hydro-lyase/aconitase, putative	K.GIFTTLPKPGGGEFGK.F	3	1604.87	29.48	6.23106	1	1	0.92	1	2992890	2468580	1.21	0	15N
AT2G05710.1	aconitate hydratase, cytoplasmic, putative / citrate hydro-lyase/aconitase, putative	R.N*GVTATDLVLTVTQMLR.K	3	1831.99	58.2	8.24245	2	2	0.95	1	1596543	1975855	0.935	0.176777	15N
AT2G05710.1	aconitate hydratase, cytoplasmic, putative / citrate hydro-lyase/aconitase, putative	R.SDETVAMIEAYLR.A	2	1496.73	57.26	3.60788	1	1	0.71	1	3366959	2751984	1.22	0	15N
AT2G05710.1	aconitate hydratase, cytoplasmic, putative / citrate hydro-lyase/aconitase, putative	R.FDTEVELAYFNHGGILPYVIR.N	3	2452.26	23.2	4.20022	1	1	0.21	1	8809157	10720362	0.82	0	15N
AT2G05710.1	aconitate hydratase, cytoplasmic, putative / citrate hydro-lyase/aconitase, putative	R.DIWPTTEEIAEVVQSSVLPDMFR.A	3	2661.32	27.72	4.69694	3	3	0.96	1	7408300	6362112	1.16	0	15N
AT2G05710.1	aconitate hydratase, cytoplasmic, putative / citrate hydro-lyase/aconitase, putative	K.WGSTAFQNMLVVPPGSGIVHQVNLEYLGR.V	3	3168.64	41.66	4.86015	3	3	0.95	2	14359630	11281974	1.27	0	15N
AT2G05710.1	aconitate hydratase, cytoplasmic, putative / citrate hydro-lyase/aconitase, putative	R.NGVTATDLVLTVTQMLR.K	2	1831.02	45.94	13.053	2	2	0.94	1	1326738	1238395	1.205	0.190919	15N
AT2G05710.1	aconitate hydratase, cytoplasmic, putative / citrate hydro-lyase/aconitase, putative	K.LSVPENTLYSWDPNSTYIHEPPYFK.D	3	2996.45	26.45	5.80691	1	1	0.97	1	6577332	5707545	1.15	0	15N
AT2G05710.1	aconitate hydratase, cytoplasmic, putative / citrate hydro-lyase/aconitase, putative	R.VDKLPYSIR.I	3	1089.63	37.3	6.1489	1	1	0.93	1	2269914	1590413	1.43	0	15N
AT2G05710.1	aconitate hydratase, cytoplasmic, putative / citrate hydro-lyase/aconitase, putative	K.DAYCLLN*FGDSITTDHISPAGNIQK.D	3	2750.33	42.78	11.7806	1	1	0.9	1	5749640	5541960	1.04	0	15N
AT2G05710.1	aconitate hydratase, cytoplasmic, putative / citrate hydro-lyase/aconitase, putative	R.VLLQDFTGVPAVVDLACMR.D	2	2103.11	85.13	8.65392	4	4	0.97	2	7512029	6511379	1.2	0.057735	15N
AT2G05710.1	aconitate hydratase, cytoplasmic, putative / citrate hydro-lyase/aconitase, putative	K.LSVFDAAMR.Y	2	1008.51	37.65	-0.793246	1	1	0.94	1	5876092	4374158	1.34	0	15N
AT2G05710.1	aconitate hydratase, cytoplasmic, putative / citrate hydro-lyase/aconitase, putative	K.SGEDADTLGLTGHER.Y	2	1556.72	44.23	5.84564	1	1	0.97	1	519119	421409	1.23	0	15N
AT2G05710.1	aconitate hydratase, cytoplasmic, putative / citrate hydro-lyase/aconitase, putative	R.ILLESAIR.N	2	913.572	52.57	5.03521	2	2	0.96	3	9701677	7313584	1.33	0	15N
AT2G05710.1	aconitate hydratase, cytoplasmic, putative / citrate hydro-lyase/aconitase, putative	R.SNLVGMGIIPLCFK.S	2	1547.84	55.1	6.71909	2	2	0.98	3	7127389	6195054	1.15	0	15N
AT2G05840.1	PAA2 (20S PROTEASOME SUBUNIT PAA2); endopeptidase/ peptidase/ threonine-type endopeptidase	K.MKENPAFTYDETVQ*TAISALQSVLQEDFK.A	3	3303.64	28.06	12.6529	1	1	0.73	2	1449282	2196627	0.66	0	14N
AT2G05840.1	PAA2 (20S PROTEASOME SUBUNIT PAA2); endopeptidase/ peptidase/ threonine-type endopeptidase	K.ENPAFTYDETVQTAISALQSVLQEDFK.A	3	3043.47	25.32	-2.46429	1	1	0.79	2	1429259	1647470	0.87	0	14N
AT2G05840.1	PAA2 (20S PROTEASOME SUBUNIT PAA2); endopeptidase/ peptidase/ threonine-type endopeptidase	K.MKENPAFTYDETVQTAISALQ*SVLQEDFK.A	3	3303.63	27.6	10.6551	1	1	0.89	2	755583	885282	0.85	0	15N
AT2G05840.1	PAA2 (20S PROTEASOME SUBUNIT PAA2); endopeptidase/ peptidase/ threonine-type endopeptidase	K.ENPAFTYDETVQTAISALQSVLQEDFK.A	3	3043.49	47.79	6.76858	1	1	0.86	2	1796058	1515615	1.19	0	15N
AT2G05840.1	PAA2 (20S PROTEASOME SUBUNIT PAA2); endopeptidase/ peptidase/ threonine-type endopeptidase	K.MKENPAFTYDETVQTAISALQSVLQEDFK.A	3	3302.65	38.54	10.8702	1	1	0.93	2	1156528	1242223	0.93	0	15N
AT2G05920.1	subtilase family protein	R.DAGGLGMIMANTAASGEELVADSHLLPAIAVGK.K	3	3178.64	39.59	11.483	2	2	0.92	1	1535224	1985632	0.77	0	15N
AT2G05990.1	MOD1 (MOSAIC DEATH 1); enoyl-[acyl-carrier-protein] reductase (NADH)/ enoyl-[acyl-carrier-protein] reductase/ oxidoreductase	K.SLAAAGAEILVGTWVPALNIFETSLRR.G	3	2854.59	30.28	3.08277	1	1	0.9	1	6039956	5111894	1.18	0	14N
AT2G05990.1	MOD1 (MOSAIC DEATH 1); enoyl-[acyl-carrier-protein] reductase (NADH)/ enoyl-[acyl-carrier-protein] reductase/ oxidoreductase	K.TLTADEVGN*AAAFLASPLASAITGATIYVDNGLNAMGVALDSPVFK.D	4	4538.34	36.61	7.43733	1	1	0.7	1	3683101	5097127	0.72	0	14N
AT2G05990.1	MOD1 (MOSAIC DEATH 1); enoyl-[acyl-carrier-protein] reductase (NADH)/ enoyl-[acyl-carrier-protein] reductase/ oxidoreductase	K.TLTADEVGN*AAAFLASPLASAITGATIYVDN*GLN*AMGVALDSPVFK.D	4	4541.34	29	13.7447	1	1	0.75	1	1935742	4503456	0.43	0	14N
AT2G05990.1	MOD1 (MOSAIC DEATH 1); enoyl-[acyl-carrier-protein] reductase (NADH)/ enoyl-[acyl-carrier-protein] reductase/ oxidoreductase	K.DFGSIDILVHSLANGPEVSKPLLETSR.K	3	2893.55	22.43	8.57086	1	1	0.61	1	2787934	4286347	0.65	0	14N
AT2G05990.1	MOD1 (MOSAIC DEATH 1); enoyl-[acyl-carrier-protein] reductase (NADH)/ enoyl-[acyl-carrier-protein] reductase/ oxidoreductase	K.TLTADEVGN*AAAFLASPLASAITGATIYVDNGLNAMGVALDSPVFK.D	4	4537.34	26.37	8.04443	1	1	0.77	1	4014031	4338556	0.93	0	15N
AT2G05990.1	MOD1 (MOSAIC DEATH 1); enoyl-[acyl-carrier-protein] reductase (NADH)/ enoyl-[acyl-carrier-protein] reductase/ oxidoreductase	K.VYALDAVFDNPEDVPEDVK.T	2	2134.03	53.69	4.31112	1	1	0.98	1	1996761	1820683	1.1	0	15N
AT2G05990.1	MOD1 (MOSAIC DEATH 1); enoyl-[acyl-carrier-protein] reductase (NADH)/ enoyl-[acyl-carrier-protein] reductase/ oxidoreductase	K.DFGSIDILVHSLAN*GPEVSKPLLETSR.K	3	2894.54	55.76	8.84433	1	1	0.92	1	1977347	3362723	0.59	0	15N
AT2G05990.1	MOD1 (MOSAIC DEATH 1); enoyl-[acyl-carrier-protein] reductase (NADH)/ enoyl-[acyl-carrier-protein] reductase/ oxidoreductase	R.VNTISAGPLGSR.A	2	1170.65	48.3	2.30642	1	1	0.96	1	2159510	1904173	1.13	0	15N
AT2G05990.1	MOD1 (MOSAIC DEATH 1); enoyl-[acyl-carrier-protein] reductase (NADH)/ enoyl-[acyl-carrier-protein] reductase/ oxidoreductase	K.TLTADEVGNAAAFLASPLASAITGATIYVDN*GLNAMGVALDSPVFK.D	4	4537.34	31.62	8.35298	1	1	0.77	1	4014031	4338556	0.93	0	15N
AT2G05990.1	MOD1 (MOSAIC DEATH 1); enoyl-[acyl-carrier-protein] reductase (NADH)/ enoyl-[acyl-carrier-protein] reductase/ oxidoreductase	K.SLAAAGAEILVGTWVPALNIFETSLR.R	3	2698.48	33.63	2.18642	1	1	0.82	1	2181388	2298246	0.95	0	15N
AT2G07560.1	AHA6 (Arabidopsis H(+)-ATPase 6); ATPase	R.EAQWALAQR.T	2	1071.56	34.11	5.31938	1	1	0.9	3	1654279	1591020	1.04	0	14N
AT2G07560.1	AHA6 (Arabidopsis H(+)-ATPase 6); ATPase	R.EAQWALAQR.T	2	1071.56	32.23	4.5728	1	1	0.88	3	2253121	1459071	1.54	0	15N
AT2G07698.1	ATP synthase alpha chain, mitochondrial, putative	R.TGSIVDVPAGK.A	2	1042.58	30.49	2.01425	1	1	0.93	2	5043648	5916753	0.85	0	14N
AT2G07698.1	ATP synthase alpha chain, mitochondrial, putative	R.NFYANFQVDEIGR.V	2	1571.75	62.34	3.05393	1	1	0.22	2	3104649	3695708	0.84	0	14N
AT2G07698.1	ATP synthase alpha chain, mitochondrial, putative	R.STVGQLIQTLEEANALEYSILVAATASDPAPLQ*FLAPYSGCAMGEYFR.D	4	5165.58	39.41	10.5724	1	1	0.77	2	3441658	4654215	0.74	0	14N
AT2G07698.1	ATP synthase alpha chain, mitochondrial, putative	K.LELAQYR.E	2	891.494	25.86	5.72076	1	1	0.97	2	5778580	7018628	0.82	0	14N
AT2G07698.1	ATP synthase alpha chain, mitochondrial, putative	R.AAELTNLFESR.I	2	1249.65	61.28	5.92171	2	2	0.92	2	12704515	14526410	0.87	0	14N
AT2G07698.1	ATP synthase alpha chain, mitochondrial, putative	R.EVAAFAQFGSDLDAATQALLNR.G	3	2307.18	61.93	7.80181	6	6	0.93	2	2995997	3598512	0.798333	0.0271416	14N
AT2G07698.1	ATP synthase alpha chain, mitochondrial, putative	K.TTIAIDTILNQK.Q	2	1329.77	57.16	5.94093	1	1	0.92	2	11549126	13678313	0.84	0	14N
AT2G07698.1	ATP synthase alpha chain, mitochondrial, putative	R.VVDAMGVPIDGK.G	2	1199.63	43.79	3.16764	2	2	0.96	2	12923220	16474962	0.78	0	14N
AT2G07698.1	ATP synthase alpha chain, mitochondrial, putative	K.SVHEPMQTGLK.A	3	1225.63	22.19	6.77208	1	1	0.91	2	1341046	1687331	0.79	0	14N
AT2G07698.1	ATP synthase alpha chain, mitochondrial, putative	K.AVDSLVPIGR.G	2	1025.6	34.9	5.26524	2	2	0.94	2	13863085	18299222	0.76	0	14N
AT2G07698.1	ATP synthase alpha chain, mitochondrial, putative	K.LELAQYR.E	2	891.494	24.66	5.27208	1	1	0.99	2	7958535	6986008	1.14	0	15N
AT2G07698.1	ATP synthase alpha chain, mitochondrial, putative	R.VVDAMGVPIDGK.G	2	1199.63	69.06	4.08459	2	2	0.98	2	18273444	16290775	1.12	0	15N
AT2G07698.1	ATP synthase alpha chain, mitochondrial, putative	K.AVDSLVPIGR.G	2	1025.6	35.88	4.09518	2	2	0.97	2	18099808	17150832	1.06	0	15N
AT2G07698.1	ATP synthase alpha chain, mitochondrial, putative	R.QMSLLLR.R	2	859.508	26.41	6.51539	1	1	0.97	3	9154506	7173934	1.28	0	15N
AT2G07698.1	ATP synthase alpha chain, mitochondrial, putative	R.TGSIVDVPAGK.A	2	1042.58	32.45	3.74074	1	1	0.98	2	6065821	5280320	1.15	0	15N
AT2G07698.1	ATP synthase alpha chain, mitochondrial, putative	R.NFYANFQVDEIGR.V	2	1571.75	48.21	1.97233	1	1	0.9	2	3514726	2870989	1.22	0	15N
AT2G07698.1	ATP synthase alpha chain, mitochondrial, putative	R.STVGQLIQTLEEANALEYSILVAATASDPAPLQ*FLAPYSGCAMGEYFR.D	4	5163.56	39.29	8.57942	1	1	0.82	2	3416000	3168509	1.08	0	15N
AT2G07698.1	ATP synthase alpha chain, mitochondrial, putative	R.AAELTNLFESR.I	2	1249.64	57.99	5.5216	2	2	0.97	2	18211651	15371670	1.18	0	15N
AT2G07698.1	ATP synthase alpha chain, mitochondrial, putative	R.EVAAFAQFGSDLDAATQALLNR.G	2	2307.17	79.36	4.55106	8	8	0.88	2	4818400	4556453	1.1	0.0282843	15N
AT2G07698.1	ATP synthase alpha chain, mitochondrial, putative	K.TTIAIDTILNQK.Q	2	1329.77	56.95	5.79053	2	2	0.98	2	13625306	10336976	1.32	0	15N
AT2G07707.1	hydrogen ion transmembrane transporter/ hydrolase, acting on acid anhydrides, catalyzing transmembrane movement of substances	R.SKDPNSLEDLLR.K	3	1385.73	24.55	5.62883	1	1	0.86	1	1742456	2376106	0.73	0	14N
AT2G07707.1	hydrogen ion transmembrane transporter/ hydrolase, acting on acid anhydrides, catalyzing transmembrane movement of substances	R.SKDPNSLEDLLR.K	3	1385.73	43.82	6.7113	1	1	0.92	1	2032938	1816706	1.12	0	15N
AT2G09990.1	40S ribosomal protein S16 (RPS16A)	R.VNGGGHTSQVYAIR.Q	3	1457.75	22.1	4.66474	1	1	0.97	3	1114236	1204650	0.92	0	14N
AT2G09990.1	40S ribosomal protein S16 (RPS16A)	R.VN*GGGHTSQVYAIR.Q	3	1458.74	29.25	4.52449	1	1	0.87	3	780269	696936	1.12	0	15N
AT2G09990.1	40S ribosomal protein S16 (RPS16A)	K.LNGCPIELFQPEILR.F	2	1797.97	45.93	8.50968	1	1	0.98	3	21052331	18289129	1.15	0	15N
AT2G09990.1	40S ribosomal protein S16 (RPS16A)	K.IFEPILLLGK.H	2	1141.72	30.13	5.08006	1	1	0.95	1	1460393	1383846	1.06	0	15N
AT2G09990.1	40S ribosomal protein S16 (RPS16A)	R.VNGGGHTSQVYAIR.Q	3	1457.75	22.13	4.45894	1	1	0.95	3	1837412	1541649	1.19	0	15N
AT2G15490.2	UGT73B4 (UDP-GLYCOSYLTRANSFERASE 73B4); UDP-glucosyltransferase/ UDP-glycosyltransferase/ quercetin 3-O-glucosyltransferase/ quercetin 7-O-glucosyltransferase/ transferase, transferring glycosyl groups	K.AAVEEGGSSYNDVNK.F	2	1538.7	42.22	4.80928	1	1	0.97	3	108868	102077	1.07	0	15N
AT2G15620.1	NIR1 (NITRITE REDUCTASE 1); ferredoxin-nitrate reductase/ nitrite reductase (NO-forming)	R.VTELVPLVAEILIK.E	3	1535.98	56.56	9.76587	1	1	0.91	1	1354624	1426439	0.95	0	14N
AT2G15620.1	NIR1 (NITRITE REDUCTASE 1); ferredoxin-nitrate reductase/ nitrite reductase (NO-forming)	R.LTVEQNIIIPNVETSKTEALLQ*EPFLK.N	3	3067.7	21.74	6.16101	1	1	0.83	1	1521108	1898168	0.8	0	14N
AT2G15620.1	NIR1 (NITRITE REDUCTASE 1); ferredoxin-nitrate reductase/ nitrite reductase (NO-forming)	R.LQADDMDELAR.L	2	1275.59	47.78	5.0957	1	1	0.86	1	1048520	1599920	0.66	0	14N
AT2G15620.1	NIR1 (NITRITE REDUCTASE 1); ferredoxin-nitrate reductase/ nitrite reductase (NO-forming)	R.GEEGKPVEGADVYVGGR.I	3	1717.84	22.3	2.15387	1	1	0.88	1	978892	1108166	0.88	0	14N
AT2G15620.1	NIR1 (NITRITE REDUCTASE 1); ferredoxin-nitrate reductase/ nitrite reductase (NO-forming)	R.MMWLIDELGVEGFR.T	2	1694.83	56.53	4.07122	1	1	0.88	1	2363614	1612562	1.47	0	15N
AT2G15620.1	NIR1 (NITRITE REDUCTASE 1); ferredoxin-nitrate reductase/ nitrite reductase (NO-forming)	R.LQADDMDELAR.L	2	1275.59	43.75	2.58705	1	1	0.68	1	2677212	2875655	0.93	0	15N
AT2G15620.1	NIR1 (NITRITE REDUCTASE 1); ferredoxin-nitrate reductase/ nitrite reductase (NO-forming)	R.LTVEQNIIIPN*VETSKTEALLQEPFLK.N	3	3067.7	29.6	6.16101	1	1	0.89	1	1622884	1225718	1.32	0	15N
AT2G15620.1	NIR1 (NITRITE REDUCTASE 1); ferredoxin-nitrate reductase/ nitrite reductase (NO-forming)	K.GLASVGLTSLQSGMDNVR.N	2	1803.93	42.32	6.26413	1	1	0.95	1	2765338	2164313	1.28	0	15N
AT2G15620.1	NIR1 (NITRITE REDUCTASE 1); ferredoxin-nitrate reductase/ nitrite reductase (NO-forming)	R.VTELVPLVAEILIK.E	3	1535.98	60.84	9.63566	3	3	0.96	1	1948261	1031111	1.97667	0.150111	15N
AT2G15620.1	NIR1 (NITRITE REDUCTASE 1); ferredoxin-nitrate reductase/ nitrite reductase (NO-forming)	K.YGEDGCADVTTR.Q	2	1342.56	30.81	3.42631	1	1	0.67	1	92750	108760	0.85	0	15N
AT2G15620.1	NIR1 (NITRITE REDUCTASE 1); ferredoxin-nitrate reductase/ nitrite reductase (NO-forming)	R.GEEGKPVEGADVYVGGR.I	3	1717.84	25.54	2.91064	1	1	0.95	1	1634756	908728	1.8	0	15N
AT2G16005.1	MD-2-related lipid recognition domain-containing protein / ML domain-containing protein	K.VSSVEISPDPVKR.S	3	1411.78	32.12	4.1083	1	1	0.98	1	5362060	25055826	0.21	0	14N
AT2G16005.1	MD-2-related lipid recognition domain-containing protein / ML domain-containing protein	K.SYSLCDITACPVAPGPIVLTLPNIFTPR.E	3	3071.61	30	7.58565	1	1	0.97	1	18980577	10308116	1.84	0	15N
AT2G16005.1	MD-2-related lipid recognition domain-containing protein / ML domain-containing protein	K.LAVGMFPVSTK.S	2	1148.64	48.3	5.04948	1	1	0.97	1	15141658	10469257	1.45	0	15N
AT2G16005.1	MD-2-related lipid recognition domain-containing protein / ML domain-containing protein	R.SGNGEITITGVTNK.E	2	1389.73	74.85	8.63485	1	1	0.94	1	4096336	2376125	1.72	0	15N
AT2G16005.1	MD-2-related lipid recognition domain-containing protein / ML domain-containing protein	R.SGN*GEITITGVTNK.E	2	1390.71	51.84	2.80434	1	1	0.87	1	2294283	1307842	1.75	0	15N
AT2G16005.1	MD-2-related lipid recognition domain-containing protein / ML domain-containing protein	K.EISDGVTVNLK.L	2	1173.64	27.39	3.23781	1	1	0.87	1	5369020	4395604	1.22	0	15N
AT2G16005.1	MD-2-related lipid recognition domain-containing protein / ML domain-containing protein	K.VSSVEISPDPVKR.S	3	1411.78	44.32	3.82497	4	4	1	1	15938049	9543878	1.67	0	15N
AT2G16360.1	40S ribosomal protein S25 (RPS25A)	K.VNNMVLFDQATYDK.L	2	1656.8	42.78	4.10432	1	1	0.92	4	2016875	2402146	0.84	0	14N
AT2G16360.1	40S ribosomal protein S25 (RPS25A)	K.VNNMVLFDQATYDK.L	2	1656.79	67.14	2.77645	1	1	0.97	4	2468562	1954606	1.26	0	15N
AT2G16600.1	ROC3; peptidyl-prolyl cis-trans isomerase	K.HVVFGQVVEGLNVVR.D	3	1650.94	47.63	6.96578	2	2	0.93	2	8000054	9863740	0.805	0.00707107	14N
AT2G16600.1	ROC3; peptidyl-prolyl cis-trans isomerase	R.TSKPVVIADCGQIS.-	2	1473.76	46.84	3.39269	2	2	0.98	2	13973042	17922656	0.78	0	14N
AT2G16600.1	ROC3; peptidyl-prolyl cis-trans isomerase	K.FMCQGGDFTAGN*GTGGESIYGSK.F	2	2341.97	61.2	-0.279628	1	1	0.91	2	2016499	2118329	0.95	0	14N
AT2G16600.1	ROC3; peptidyl-prolyl cis-trans isomerase	K.FMCQGGDFTAGNGTGGESIYGSK.F	2	2340	91.12	5.38465	1	1	0.9	2	2109699	2442720	0.86	0	14N
AT2G16600.1	ROC3; peptidyl-prolyl cis-trans isomerase	K.HTGPGILSMANAGANTN*GSQFFICTEK.T	3	2823.35	38.61	15.0887	1	1	0.96	2	9825400	10987406	0.89	0	14N
AT2G16600.1	ROC3; peptidyl-prolyl cis-trans isomerase	K.FKDENFIK.K	3	1039.55	21.61	3.27067	1	1	0.96	3	3497121	3561179	0.98	0	14N
AT2G16600.1	ROC3; peptidyl-prolyl cis-trans isomerase	R.IVMELYADTTPETAENFR.A	2	2099	92.52	3.62078	2	2	0.93	2	7122947	8113335	0.88	0	14N
AT2G16600.1	ROC3; peptidyl-prolyl cis-trans isomerase	K.HVVFGQVVEGLNVVR.D	3	1650.94	58.32	6.90521	3	3	0.97	2	14421810	10731870	1.18333	0.271355	15N
AT2G16600.1	ROC3; peptidyl-prolyl cis-trans isomerase	R.TSKPVVIADCGQIS.-	2	1473.76	37.72	2.91771	2	2	0.99	2	12716548	10397332	1.22	0	15N
AT2G16600.1	ROC3; peptidyl-prolyl cis-trans isomerase	K.HTGPGILSMANAGANTNGSQFFICTEK.T	3	2822.33	27.24	2.3385	1	1	0.73	2	12147762	12532149	0.97	0	15N
AT2G16600.1	ROC3; peptidyl-prolyl cis-trans isomerase	K.VYFDMTVGGK.S	2	1115.55	26.43	6.0957	1	1	0.9	2	4416962	3113198	1.42	0	15N
AT2G16600.1	ROC3; peptidyl-prolyl cis-trans isomerase	K.HTGPGILSMANAGANTNGSQ*FFICTEK.T	3	2824.34	46.68	10.3586	1	1	0.76	2	12202242	12173804	1	0	15N
AT2G16600.1	ROC3; peptidyl-prolyl cis-trans isomerase	K.FMCQGGDFTAGNGTGGESIYGSK.F	2	2339.99	60.9	-0.0427353	1	1	0.93	2	2218286	1787387	1.24	0	15N
AT2G16600.1	ROC3; peptidyl-prolyl cis-trans isomerase	K.FKDENFIK.K	3	1039.55	28.93	6.82993	1	1	0.97	3	5315453	4777427	1.11	0	15N
AT2G16600.1	ROC3; peptidyl-prolyl cis-trans isomerase	R.IVMELYADTTPETAENFR.A	2	2099	77.92	4.0972	2	2	0.89	2	9758038	7578208	1.29	0	15N
AT2G16850.1	PIP2;8 (PLASMA MEMBRANE INTRINSIC PROTEIN 2;8); water channel	R.DSHVPVLAPLPIGFAVFMVHLATIPITGTGINPAR.S	4	3621.03	26.21	7.37366	1	1	0.75	5	7432365	9092230	0.82	0	14N
AT2G17130.1	IDH2 (ISOCITRATE DEHYDROGENASE SUBUNIT 2); isocitrate dehydrogenase (NAD+)/ oxidoreductase, acting on the CH-OH group of donors, NAD or NADP as acceptor	K.NANPVALLLSSAMMLR.H	3	1699.93	43.41	6.82385	2	2	0.9	2	1530032	1072874	1.43	0	15N
AT2G17265.1	HSK (HOMOSERINE KINASE); homoserine kinase	K.TFAPATVAN*LGPGFDFLGCAVDGLGDHVTLR.V	3	3188.6	35.85	11.4158	1	1	0.8	1	1421786	1645067	0.86	0	15N
AT2G17360.1	40S ribosomal protein S4 (RPS4A)	R.EVISILMQR.H	2	1087.62	27.95	4.59722	1	1	0.82	4	3962224	4876767	0.81	0	14N
AT2G17360.1	40S ribosomal protein S4 (RPS4A)	K.LGGAFAPKPSSGPHK.S	4	1449.79	27.66	6.69067	1	1	0.99	4	2934061	4024752	0.73	0	14N
AT2G17360.1	40S ribosomal protein S4 (RPS4A)	K.LTIIEEAR.K	2	943.545	35.53	3.39148	1	1	0.9	4	3103633	4731596	0.66	0	14N
AT2G17360.1	40S ribosomal protein S4 (RPS4A)	K.GSFETIHIQDSTGHEFATR.L	3	2132	31.31	0.281426	1	1	0.93	4	1761934	2111228	0.83	0	14N
AT2G17360.1	40S ribosomal protein S4 (RPS4A)	R.LGNVYTIGK.G	2	963.552	44.85	5.70808	1	1	0.9	4	2768673	3853736	0.72	0	14N
AT2G17360.1	40S ribosomal protein S4 (RPS4A)	K.GIPYLNTYDGR.T	2	1268.63	29.7	1.92912	1	1	0.95	4	6146786	3916099	1.57	0	15N
AT2G17360.1	40S ribosomal protein S4 (RPS4A)	K.LGGAFAPKPSSGPHK.S	3	1449.78	25.59	0.34488	1	1	0.95	4	820671	720743	1.14	0	15N
AT2G17360.1	40S ribosomal protein S4 (RPS4A)	K.LDLEENKIVEFIK.F	3	1588.89	23.42	7.93012	1	1	0.86	3	2074900	2137764	0.97	0	15N
AT2G17360.1	40S ribosomal protein S4 (RPS4A)	K.LTIIEEAR.K	2	943.547	38.11	5.61713	1	1	0.98	4	4313433	4270321	1.01	0	15N
AT2G17360.1	40S ribosomal protein S4 (RPS4A)	K.SRECLPLVLIIR.N	3	1467.88	32.6	7.56199	1	1	0.96	4	2787769	2546073	1.09	0	15N
AT2G17360.1	40S ribosomal protein S4 (RPS4A)	K.GSFETIHIQDSTGHEFATR.L	3	2132.01	50.38	2.86116	1	1	0.9	4	3074003	2530284	1.21	0	15N
AT2G17360.1	40S ribosomal protein S4 (RPS4A)	R.LGNVYTIGK.G	2	963.55	49.6	3.63241	1	1	0.97	4	3846901	3555402	1.08	0	15N
AT2G17360.1	40S ribosomal protein S4 (RPS4A)	R.EVISILMQR.H	2	1087.62	31.5	5.33278	1	1	0.92	4	6265515	6147834	1.02	0	15N
AT2G17360.1	40S ribosomal protein S4 (RPS4A)	K.GTKPWVSLPK.G	3	1111.65	22.87	5.66727	1	1	0.98	4	6356515	5044530	1.26	0	15N
AT2G17360.1	40S ribosomal protein S4 (RPS4A)	K.FDVGNVVMVTGGR.N	2	1349.69	56.83	2.44502	1	1	0.83	4	3957409	2551519	1.55	0	15N
AT2G17420.1	NTRA (NADPH-DEPENDENT THIOREDOXIN REDUCTASE A); thioredoxin-disulfide reductase	R.GISACAVCDGAAPIFR.N	2	1663.8	43.33	4.92851	1	1	0.91	2	2494383	2966213	0.84	0	14N
AT2G17420.1	NTRA (NADPH-DEPENDENT THIOREDOXIN REDUCTASE A); thioredoxin-disulfide reductase	R.QAITAAGTGCMAALDAEHYLQEIGSQEGK.S	3	3019.42	27.74	2.58329	1	1	0.92	1	2719758	2891441	0.94	0	14N
AT2G17420.1	NTRA (NADPH-DEPENDENT THIOREDOXIN REDUCTASE A); thioredoxin-disulfide reductase	K.VSGLFFAIGHEPATK.F	3	1572.84	23.94	4.25982	1	1	0.94	2	10615752	9126902	1.16	0	15N
AT2G17420.1	NTRA (NADPH-DEPENDENT THIOREDOXIN REDUCTASE A); thioredoxin-disulfide reductase	K.NVVTGDVSDLK.V	2	1145.61	28.19	5.32472	1	1	0.92	2	4467995	3698950	1.21	0	15N
AT2G17420.1	NTRA (NADPH-DEPENDENT THIOREDOXIN REDUCTASE A); thioredoxin-disulfide reductase	R.QAITAAGTGCMAALDAEHYLQ*EIGSQEGK.S	3	3020.42	52.12	7.51558	1	1	0.86	1	3726646	4074024	0.91	0	15N
AT2G17420.1	NTRA (NADPH-DEPENDENT THIOREDOXIN REDUCTASE A); thioredoxin-disulfide reductase	R.GISACAVCDGAAPIFR.N	2	1663.8	50.42	3.96685	1	1	0.91	2	3036014	2443169	1.24	0	15N
AT2G17630.1	phosphoserine aminotransferase, putative	R.ASIYNAMPLAGVEK.L	2	1462.77	58.76	8.95569	1	1	0.89	2	1993336	2837988	0.7	0	14N
AT2G17630.1	phosphoserine aminotransferase, putative	R.GSGMSVMEMSHR.G	3	1307.56	21.7	5.04761	1	1	0.92	2	823762	849906	0.97	0	14N
AT2G17630.1	phosphoserine aminotransferase, putative	R.ASIYNAMPLAGVEK.L	2	1462.76	51.6	5.05894	1	1	0.85	2	2242899	2849511	0.79	0	15N
AT2G17630.1	phosphoserine aminotransferase, putative	R.GSGMSVMEMSHR.G	3	1307.56	21.17	5.88888	1	1	0.92	2	1078045	989638	1.09	0	15N
AT2G17630.1	phosphoserine aminotransferase, putative	K.NVGPSGVTIVIIR.K	2	1323.8	54.7	4.07918	1	1	0.9	2	1773120	4081888	0.43	0	15N
AT2G17790.1	VPS35A (VPS35 HOMOLOG A)	K.IANSAQQVANTAR.G	2	1342.71	29.48	4.69203	1	1	0.87	1	53889	78905	0.68	0	14N
AT2G18020.1	EMB2296 (embryo defective 2296); structural constituent of ribosome	R.ASGDYAIVIAHNPDSDTTR.I	3	2001.94	56.91	-1.59844	1	1	0.92	1	5824124	7634420	0.76	0	14N
AT2G18020.1	EMB2296 (embryo defective 2296); structural constituent of ribosome	K.GVVTEIIHDPGR.G	2	1291.7	45.57	4.33538	1	1	0.85	2	2774754	2664120	1.04	0	14N
AT2G18020.1	EMB2296 (embryo defective 2296); structural constituent of ribosome	K.KATLVVGNVLPLR.S	3	1378.88	26.2	6.01941	1	1	0.86	2	3280556	4575682	0.72	0	14N
AT2G18020.1	EMB2296 (embryo defective 2296); structural constituent of ribosome	R.ASGDYAIVIAHNPDSDTTR.I	3	2001.94	40.63	-2.69737	1	1	0.9	1	10874744	9467754	1.15	0	15N
AT2G18020.1	EMB2296 (embryo defective 2296); structural constituent of ribosome	K.GVVTEIIHDPGR.G	2	1291.71	27.75	7.81918	1	1	0.94	2	4325273	3250455	1.33	0	15N
AT2G18020.1	EMB2296 (embryo defective 2296); structural constituent of ribosome	K.ATLVVGNVLPLR.S	2	1250.79	26.49	5.91631	1	1	0.94	2	5390903	4233112	1.27	0	15N
AT2G18020.1	EMB2296 (embryo defective 2296); structural constituent of ribosome	K.KATLVVGNVLPLR.S	3	1378.88	29.47	4.93156	1	1	0.98	2	4476072	3770901	1.19	0	15N
AT2G18450.1	SDH1-2; succinate dehydrogenase	R.LGANSLLDIVVFGR.A	2	1472.86	74.19	12.0855	1	1	0.46	2	2473081	8597331	0.29	0	14N
AT2G18450.1	SDH1-2; succinate dehydrogenase	R.LGANSLLDIVVFGR.A	2	1472.85	74.55	7.33276	2	2	0.92	2	2671657	11757111	0.185	0.0636396	15N
AT2G18960.1	AHA1 (ARABIDOPSIS H+ ATPASE 1); ATPase/ hydrogen-exporting ATPase, phosphorylative mechanism / protein binding	K.WSEQEAAILVPGDIVSIK.L	2	1954.06	61.66	5.73169	1	1	0.89	3	4180742	6420677	0.65	0	14N
AT2G18960.1	AHA1 (ARABIDOPSIS H+ ATPASE 1); ATPase/ hydrogen-exporting ATPase, phosphorylative mechanism / protein binding	R.VENQDAIDAAMVGMLADPK.E	2	1986.96	68.3	6.74402	1	1	0.94	4	2826545	3657016	0.77	0	14N
AT2G18960.1	AHA1 (ARABIDOPSIS H+ ATPASE 1); ATPase/ hydrogen-exporting ATPase, phosphorylative mechanism / protein binding	K.WSEQEAAILVPGDIVSIK.L	2	1954.06	25.56	3.94054	1	1	0.87	3	8733004	8663241	1.01	0	15N
AT2G18960.1	AHA1 (ARABIDOPSIS H+ ATPASE 1); ATPase/ hydrogen-exporting ATPase, phosphorylative mechanism / protein binding	K.NLVEVFCK.G	2	1007.52	28.1	5.06194	1	1	0.91	3	1290040	1150781	1.12	0	15N
AT2G18960.1	AHA1 (ARABIDOPSIS H+ ATPASE 1); ATPase/ hydrogen-exporting ATPase, phosphorylative mechanism / protein binding	K.HPGQEVFSGSTCK.Q	3	1432.65	22.06	3.55984	1	1	0.96	3	944964	831454	1.14	0	15N
AT2G18960.1	AHA1 (ARABIDOPSIS H+ ATPASE 1); ATPase/ hydrogen-exporting ATPase, phosphorylative mechanism / protein binding	K.QGEIEAVVIATGVHTFFGK.A	3	2002.08	29.38	8.14161	1	1	0.7	8	4461439	4199722	1.06	0	15N
AT2G18960.1	AHA1 (ARABIDOPSIS H+ ATPASE 1); ATPase/ hydrogen-exporting ATPase, phosphorylative mechanism / protein binding	R.VENQDAIDAAMVGMLADPK.E	2	1986.95	96.36	3.07004	1	1	0.95	4	4683157	3777272	1.24	0	15N
AT2G18980.1	peroxidase, putative	R.IAINMDPTSPNTFDNAYFK.N	2	2158.02	40.19	2.68766	1	1	0.98	1	2863879	2652837	1.08	0	14N
AT2G18980.1	peroxidase, putative	R.HGLSQTDMIALSGAHTIGFAHCGK.F	4	2508.21	35.8	2.31241	1	1	0.93	2	9520450	9588578	0.99	0	14N
AT2G18980.1	peroxidase, putative	K.FQQTFVTAPATLR.L	2	1478.8	48.36	5.34218	2	2	0.9	2	9004792	9940948	0.91	0	14N
AT2G18980.1	peroxidase, putative	K.VSCADILALATR.D	2	1288.69	79.96	3.64712	1	1	0.9	3	11965800	17726266	0.68	0	14N
AT2G18980.1	peroxidase, putative	R.IAINMDPTSPNTFDNAYFK.N	2	2158.02	41.46	2.91935	1	1	0.96	1	2421418	3123833	0.78	0	15N
AT2G18980.1	peroxidase, putative	K.FQQTFVTAPATLR.L	2	1478.8	50.97	3.11064	1	1	0.93	2	12541741	12845931	0.98	0	15N
AT2G19480.1	NAP1;2 (NUCLEOSOME ASSEMBLY PROTEIN 1;2); DNA binding	R.EIQNQYDEMEAK.F	2	1496.66	42.41	3.00671	1	1	0.95	2	538758	444261	1.21	0	15N
AT2G19730.1	60S ribosomal protein L28 (RPL28A)	K.AVANQVVDNYYRPDLK.K	3	1863.96	21.31	2.46787	1	1	0.91	1	1671687	1920766	0.87	0	14N
AT2G19740.1	60S ribosomal protein L31 (RPL31A)	R.N*DDEDAKEEFFSLVTVAEIPAEGLSGLGTK.V	3	3181.57	39.01	13.8613	1	1	0.7	3	2329641	4006854	0.58	0	14N
AT2G19760.1	PRF1 (PROFILIN 1); actin binding	K.DFEEPGFLAPTGLFLGGEK.Y	2	2023	43.94	1.28522	1	1	0.75	1	6084973	7813379	0.78	0	14N
AT2G19760.1	PRF1 (PROFILIN 1); actin binding	K.DFEEPGFLAPTGLFLGGEK.Y	2	2023	54.87	1.33465	2	2	0.94	1	12119724	9521255	1.27	0	15N
AT2G19900.1	ATNADP-ME1 (NADP-malic enzyme 1); malate dehydrogenase (oxaloacetate-decarboxylating) (NADP+)/ malic enzyme/ oxidoreductase, acting on NADH or NADPH, NAD or NADP as acceptor	K.IWLVDSK.G	2	859.493	25.9	5.93376	1	1	0.93	4	5100819	2503776	2.04	0	15N
AT2G20140.1	26S protease regulatory complex subunit 4, putative	K.VLSVVGILQDEVDPMVSVMK.V	2	2157.16	41.75	6.39733	1	1	0.91	2	1062814	1656758	0.64	0	14N
AT2G20140.1	26S protease regulatory complex subunit 4, putative	K.VLSVVGILQDEVDPMVSVMK.V	2	2157.17	45.5	9.36421	2	2	0.89	2	989630	1048809	0.805	0.190919	15N
AT2G20140.1	26S protease regulatory complex subunit 4, putative	K.AVANSTSATFLR.V	2	1236.66	30.85	6.22648	1	1	0.8	2	939586	696474	1.35	0	15N
AT2G20360.1	binding / catalytic/ coenzyme binding	K.AAAEEAVLNALPEATIMRPATMIGTEDR.I	3	2940.49	33.16	4.96518	1	1	0.78	1	2262371	2902716	0.78	0	14N
AT2G20360.1	binding / catalytic/ coenzyme binding	K.AAAEEAVLNALPEATIMRPATMIGTEDR.I	3	2940.5	34.27	7.51579	1	1	0.91	1	2883845	3180617	0.91	0	15N
AT2G20360.1	binding / catalytic/ coenzyme binding	K.TYELGGPDVFTTHELAEIMYDMIR.E	3	2800.33	27.66	5.49938	1	1	0.94	1	3072720	2851933	1.08	0	15N
AT2G20420.1	succinyl-CoA ligase (GDP-forming) beta-chain, mitochondrial, putative / succinyl-CoA synthetase, beta chain, putative / SCS-beta, putative	K.CDVIASGIVNAAK.E	2	1316.69	54.66	3.03794	1	1	0.43	1	2648650	3476182	0.76	0	14N
AT2G20420.1	succinyl-CoA ligase (GDP-forming) beta-chain, mitochondrial, putative / succinyl-CoA synthetase, beta chain, putative / SCS-beta, putative	K.AILVNIFGGIMK.C	2	1274.76	73.96	7.06021	2	2	0.93	1	3401720	4674334	0.73	0	14N
AT2G20420.1	succinyl-CoA ligase (GDP-forming) beta-chain, mitochondrial, putative / succinyl-CoA synthetase, beta chain, putative / SCS-beta, putative	R.KTDCTMLEINPLAETSTNQLVAADAK.L	3	2833.4	60.43	3.52934	1	1	0.95	1	2864640	4424906	0.65	0	14N
AT2G20420.1	succinyl-CoA ligase (GDP-forming) beta-chain, mitochondrial, putative / succinyl-CoA synthetase, beta chain, putative / SCS-beta, putative	K.LHGGTPANFLDVGGNASEHQVVEAFK.I	4	2693.34	31.9	4.60397	1	1	0.86	1	2007616	3238310	0.62	0	14N
AT2G20420.1	succinyl-CoA ligase (GDP-forming) beta-chain, mitochondrial, putative / succinyl-CoA synthetase, beta chain, putative / SCS-beta, putative	K.AIQDVFPNESELVVK.S	2	1686.91	33.99	12.8639	1	1	0.95	1	3671578	5606895	0.65	0	14N
AT2G20420.1	succinyl-CoA ligase (GDP-forming) beta-chain, mitochondrial, putative / succinyl-CoA synthetase, beta chain, putative / SCS-beta, putative	K.LITADDLDDAAEK.A	2	1388.68	62.71	3.31251	1	1	0.96	1	4264374	5197875	0.82	0	14N
AT2G20420.1	succinyl-CoA ligase (GDP-forming) beta-chain, mitochondrial, putative / succinyl-CoA synthetase, beta chain, putative / SCS-beta, putative	K.VPIDVFAGITDEDAAK.V	2	1659.86	74.09	8.19354	1	1	0.87	1	3907115	4673582	0.84	0	14N
AT2G20420.1	succinyl-CoA ligase (GDP-forming) beta-chain, mitochondrial, putative / succinyl-CoA synthetase, beta chain, putative / SCS-beta, putative	K.LNFDDNAAFR.Q	2	1181.56	50.23	2.03122	1	1	0.73	1	3483354	2181186	1.6	0	14N
AT2G20420.1	succinyl-CoA ligase (GDP-forming) beta-chain, mitochondrial, putative / succinyl-CoA synthetase, beta chain, putative / SCS-beta, putative	K.CDVIASGIVNAAK.E	2	1316.69	52.79	6.22777	1	1	0.61	1	3227377	2762837	1.17	0	15N
AT2G20420.1	succinyl-CoA ligase (GDP-forming) beta-chain, mitochondrial, putative / succinyl-CoA synthetase, beta chain, putative / SCS-beta, putative	K.AILVNIFGGIMK.C	2	1274.76	83.55	6.27574	2	2	0.89	1	5424612	3868890	1.4	0	15N
AT2G20420.1	succinyl-CoA ligase (GDP-forming) beta-chain, mitochondrial, putative / succinyl-CoA synthetase, beta chain, putative / SCS-beta, putative	R.KTDCTMLEINPLAETSTNQLVAADAK.L	3	2833.41	35.92	6.17634	1	1	0.93	1	4758456	4003154	1.19	0	15N
AT2G20420.1	succinyl-CoA ligase (GDP-forming) beta-chain, mitochondrial, putative / succinyl-CoA synthetase, beta chain, putative / SCS-beta, putative	K.AIQDVFPNESELVVK.S	2	1686.9	34.07	5.45382	2	2	0.84	1	6467024	6367037	1.02	0	15N
AT2G20420.1	succinyl-CoA ligase (GDP-forming) beta-chain, mitochondrial, putative / succinyl-CoA synthetase, beta chain, putative / SCS-beta, putative	K.MLGQVLVTK.Q	2	987.592	39.14	5.46788	1	1	0.94	1	3048487	2368834	1.29	0	15N
AT2G20420.1	succinyl-CoA ligase (GDP-forming) beta-chain, mitochondrial, putative / succinyl-CoA synthetase, beta chain, putative / SCS-beta, putative	K.VPIDVFAGITDEDAAK.V	2	1659.86	49.75	8.31404	1	1	0.91	1	7947536	6391394	1.24	0	15N
AT2G20420.1	succinyl-CoA ligase (GDP-forming) beta-chain, mitochondrial, putative / succinyl-CoA synthetase, beta chain, putative / SCS-beta, putative	R.LNIHEYQGAELMGK.Y	3	1601.8	25.98	5.43141	1	1	0.92	1	1936855	1375561	1.41	0	15N
AT2G20420.1	succinyl-CoA ligase (GDP-forming) beta-chain, mitochondrial, putative / succinyl-CoA synthetase, beta chain, putative / SCS-beta, putative	K.LITADDLDDAAEK.A	2	1388.68	82.96	5.25681	1	1	0.94	1	5871717	4473438	1.31	0	15N
AT2G20420.1	succinyl-CoA ligase (GDP-forming) beta-chain, mitochondrial, putative / succinyl-CoA synthetase, beta chain, putative / SCS-beta, putative	K.GVAASSLEEVKK.A	2	1216.68	28.01	2.95889	1	1	0.86	1	297320	411342	0.72	0	15N
AT2G20450.1	60S ribosomal protein L14 (RPL14A)	R.LSLTDIVIDINRVPK.K	3	1695.01	41.02	6.43068	1	1	0.92	2	13513305	7698282	1.76	0	15N
AT2G20450.1	60S ribosomal protein L14 (RPL14A)	R.ALVDAPDMER.I	2	1115.54	27.6	4.03394	1	1	0.98	2	8569637	6699400	1.28	0	15N
AT2G20450.1	60S ribosomal protein L14 (RPL14A)	R.LSLTDIVIDINR.V	2	1370.79	51.66	7.22214	1	1	0.8	2	2486699	2240899	1.11	0	15N
AT2G20580.1	RPN1A (26S PROTEASOME REGULATORY SUBUNIT S2 1A); binding / enzyme regulator	R.FLPLGLGLLYLGK.Q	2	1402.88	57.72	7.69852	1	1	0.92	2	1479040	2057585	0.72	0	14N
AT2G20580.1	RPN1A (26S PROTEASOME REGULATORY SUBUNIT S2 1A); binding / enzyme regulator	R.VGQAVDVVGQAGRPK.T	3	1479.83	28.95	4.73029	1	1	0.97	2	1543329	1269708	1.22	0	15N
AT2G20580.1	RPN1A (26S PROTEASOME REGULATORY SUBUNIT S2 1A); binding / enzyme regulator	R.FLPLGLGLLYLGK.Q	2	1402.88	68.77	6.558	1	1	0.91	2	2075203	1661117	1.25	0	15N
AT2G20610.1	SUR1 (SUPERROOT 1); S-alkylthiohydroximate lyase/ carbon-sulfur lyase/ transaminase	K.IGWIALNDPEGVFETTK.V	2	1888.99	48.06	10.6937	1	1	0.63	2	1522941	10583891	0.14	0	15N
AT2G21060.1	ATGRP2B (GLYCINE-RICH PROTEIN 2B); DNA binding / nucleic acid binding / zinc ion binding	K.GFGFITPSDGGDDLFVHQSSIR.S	3	2351.13	30.45	3.14743	1	1	0.96	1	3376055	3911580	0.86	0	14N
AT2G21130.1	peptidyl-prolyl cis-trans isomerase / cyclophilin (CYP2) / rotamase	K.HVVFGQVVEGLDVVK.A	2	1623.92	45.99	7.02011	3	3	0.91	2	8894697	10082415	0.866667	0.023094	14N
AT2G21130.1	peptidyl-prolyl cis-trans isomerase / cyclophilin (CYP2) / rotamase	K.FEDENFER.K	2	1084.46	46.62	3.13522	1	1	0.94	2	4926160	4737260	1.04	0	15N
AT2G21130.1	peptidyl-prolyl cis-trans isomerase / cyclophilin (CYP2) / rotamase	K.HVVFGQVVEGLDVVK.A	3	1623.92	51.16	6.65063	4	4	0.96	2	12803718	11430580	1.0625	0.135739	15N
AT2G21410.1	VHA-A2 (VACUOLAR PROTON ATPASE A2); ATPase	K.LGFLTGLVPR.E	2	1071.66	48.61	6.53197	1	1	0.94	2	1699082	2251703	0.75	0	14N
AT2G21410.1	VHA-A2 (VACUOLAR PROTON ATPASE A2); ATPase	R.DVSCSEATTIGLIK.T	3	1494.77	27.97	4.81714	2	2	0.97	2	16964476	218224	77.74	0	15N
AT2G21410.1	VHA-A2 (VACUOLAR PROTON ATPASE A2); ATPase	K.LGFLTGLVPR.E	2	1071.66	35.72	6.99854	1	1	0.95	2	2374675	2100598	1.13	0	15N
AT2G21580.1	40S ribosomal protein S25 (RPS25B)	R.MVSAHSSQQIYTR.A	3	1506.74	23.42	5.17676	1	1	0.89	3	921243	1192636	0.77	0	14N
AT2G21620.1	RD2	R.EVVLPSLIPVVPEPELER.E	2	2014.15	29.03	3.07823	1	1	0.98	2	2050754	1949407	1.05	0	15N
AT2G21620.1	RD2	R.LADTLHLVHAVSSVK.N	3	1588.91	29.85	3.52445	1	1	0.89	1	1515100	1577821	0.96	0	15N
AT2G21660.1	CCR2 (COLD, CIRCADIAN RHYTHM, AND RNA BINDING 2); RNA binding / double-stranded DNA binding / single-stranded DNA binding	K.DAIEGMNGQDLDGR.S	2	1489.66	49.22	1.27546	1	1	0.9	2	2431250	2803897	0.87	0	14N
AT2G21660.1	CCR2 (COLD, CIRCADIAN RHYTHM, AND RNA BINDING 2); RNA binding / double-stranded DNA binding / single-stranded DNA binding	R.GFGFVTFKDEK.A	2	1273.65	37.47	3.06208	1	1	0.98	6	22299327	27777616	0.8	0	14N
AT2G21660.1	CCR2 (COLD, CIRCADIAN RHYTHM, AND RNA BINDING 2); RNA binding / double-stranded DNA binding / single-stranded DNA binding	R.CFVGGLAWATDDR.A	2	1466.68	64.86	4.22727	2	2	0.86	2	7052611	8401427	0.84	0	14N
AT2G21660.1	CCR2 (COLD, CIRCADIAN RHYTHM, AND RNA BINDING 2); RNA binding / double-stranded DNA binding / single-stranded DNA binding	R.ALETAFAQYGDVIDSK.I	2	1726.85	104.23	2.66381	3	3	0.93	2	31603030	39744701	0.8	0	14N
AT2G21660.1	CCR2 (COLD, CIRCADIAN RHYTHM, AND RNA BINDING 2); RNA binding / double-stranded DNA binding / single-stranded DNA binding	R.CFVGGLAWATDDR.A	2	1466.67	62.35	3.95454	3	3	0.96	2	7834756	6907712	1.13667	0.011547	15N
AT2G21660.1	CCR2 (COLD, CIRCADIAN RHYTHM, AND RNA BINDING 2); RNA binding / double-stranded DNA binding / single-stranded DNA binding	R.ALETAFAQYGDVIDSK.I	2	1726.86	102.62	5.38553	3	3	0.94	2	41563559	40243325	1.03	0	15N
AT2G21660.1	CCR2 (COLD, CIRCADIAN RHYTHM, AND RNA BINDING 2); RNA binding / double-stranded DNA binding / single-stranded DNA binding	K.DAIEGMN*GQDLDGR.S	2	1490.64	47.32	4.09221	2	2	0.89	2	2442635	4752447	0.845	0.473762	15N
AT2G21660.1	CCR2 (COLD, CIRCADIAN RHYTHM, AND RNA BINDING 2); RNA binding / double-stranded DNA binding / single-stranded DNA binding	R.GFGFVTFKDEK.A	2	1273.65	41.36	2.74802	2	2	0.93	6	23874565	19813661	1.2	0	15N
AT2G21660.1	CCR2 (COLD, CIRCADIAN RHYTHM, AND RNA BINDING 2); RNA binding / double-stranded DNA binding / single-stranded DNA binding	R.SITVNEAQSR.G	2	1103.57	28.13	3.80585	1	1	0.61	2	212864	225124	0.95	0	15N
AT2G21870.2	unknown protein	R.GLTDELGAEAMMFEALEK.V	2	1953.93	42.34	6.75567	1	1	0.86	2	1370298	1665342	0.82	0	14N
AT2G21870.2	unknown protein	K.AQLDELKSDAVEAMESQK.K	3	1990.96	47.63	0.251135	1	1	0.68	2	3354701	4392315	0.76	0	14N
AT2G21870.2	unknown protein	K.GMDLLVAEFEK.G	2	1250.64	48.14	7.43626	1	1	0.93	2	2261906	2485601	0.91	0	14N
AT2G21870.2	unknown protein	R.GLTDELGAEAMMFEALEK.V	2	1953.92	77.02	4.7085	1	1	0.88	2	2217387	2348515	0.94	0	15N
AT2G21870.2	unknown protein	K.GMDLLVAEFEK.G	2	1250.64	52.63	6.1569	1	1	0.91	2	3807103	3070968	1.24	0	15N
AT2G21870.2	unknown protein	R.IKHDIDTETQDIPDAR.A	3	1865.92	43.91	2.84042	2	2	0.96	2	1310734	996113	1.255	0.0919239	15N
AT2G22170.1	lipid-associated family protein	R.VYDKYGDYIGIR.N	3	1460.74	21.28	2.66988	1	1	0.74	1	12982506	14781128	0.88	0	14N
AT2G22170.1	lipid-associated family protein	R.NLEAWGGLMGPGYNYYER.G	2	2088.95	72.12	3.15949	2	2	0.8	1	16662322	18706734	0.89	0	14N
AT2G22170.1	lipid-associated family protein	K.YGDYIGIR.N	2	955.482	45.53	-1.7792	1	1	0.91	1	3776178	4504237	0.84	0	14N
AT2G22170.1	lipid-associated family protein	K.CSYQSFDVEQWLASDTSPYELSAVR.N	3	2937.33	34.38	4.80029	1	1	0.93	1	5652698	7092145	0.8	0	14N
AT2G22170.1	lipid-associated family protein	R.GNLDIFSGK.A	2	949.498	41.15	3.26489	2	2	0.93	1	7658197	9504446	0.81	0	14N
AT2G22170.1	lipid-associated family protein	R.GNLDIFSGK.A	2	949.5	42.85	5.26596	2	2	0.96	1	8843361	7466099	1.18	0	15N
AT2G22170.1	lipid-associated family protein	R.NLEAWGGLMGPGYNYYER.G	2	2088.95	86.35	3.54246	3	3	0.84	1	16926800	15396335	1.1	0	15N
AT2G22170.1	lipid-associated family protein	K.YGDYIGIR.N	2	955.483	45.82	-0.941931	1	1	0.98	1	8768504	8218983	1.07	0	15N
AT2G22170.1	lipid-associated family protein	K.AGTDSIISAR.V	2	989.527	45.8	4.85083	1	1	0.82	2	554041	528783	1.05	0	15N
AT2G22230.1	beta-hydroxyacyl-ACP dehydratase, putative	R.FRKPVIAGDTLVMR.M	3	1601.92	22.82	4.99402	1	1	0.92	2	1594295	1858526	0.86	0	14N
AT2G22230.1	beta-hydroxyacyl-ACP dehydratase, putative	R.FPFLLVDR.V	2	1005.58	43.84	6.76232	1	1	0.87	2	1765691	2355429	0.75	0	14N
AT2G22230.1	beta-hydroxyacyl-ACP dehydratase, putative	R.FPFLLVDR.V	2	1005.58	31.26	4.7734	1	1	0.9	2	2682394	3034389	0.88	0	15N
AT2G22250.1	aminotransferase class I and II family protein	K.LQGQVSSGASSIAQK.A	2	1459.78	37.52	2.80866	1	1	0.96	2	175600	212475	0.83	0	14N
AT2G22250.1	aminotransferase class I and II family protein	K.LQGQVSSGASSIAQK.A	2	1459.78	57.36	3.63071	1	1	0.96	2	255001	237093	1.08	0	15N
AT2G24200.1	cytosol aminopeptidase	K.LSSVSALASGIVLGLFEDGR.Y	3	1990.09	38.7	5.97966	1	1	0.67	1	1530023	2153670	0.71	0	14N
AT2G24200.1	cytosol aminopeptidase	R.ELINSPANVLTPAVLAEEAAK.V	2	2149.18	38.75	3.25707	1	1	0.97	1	4462553	5626442	0.79	0	14N
AT2G24200.1	cytosol aminopeptidase	K.VDAHLSGLLAQ*VSSEEDFTGKPGQSTVLR.L	4	3041.58	53.24	13.2499	1	1	0.81	1	41283640	8149902	5.07	0	14N
AT2G24200.1	cytosol aminopeptidase	K.GLTFDSGGYNIK.T	2	1270.63	39.57	0.62961	1	1	0.96	3	2198674	2479968	0.89	0	14N
AT2G24200.1	cytosol aminopeptidase	K.VQWMHIDMAGPVWNEK.K	3	1939.92	21.7	0.77323	1	1	0.88	1	2505569	2758281	0.91	0	14N
AT2G24200.1	cytosol aminopeptidase	R.MPLEESYWEMMK.S	2	1572.68	30.53	5.65915	1	1	0.9	1	2587513	2996462	0.86	0	14N
AT2G24200.1	cytosol aminopeptidase	K.SGVADMVNTGGR.A	2	1162.55	60.16	4.38692	1	1	0.97	2	2258533	1522724	1.48	0	15N
AT2G24200.1	cytosol aminopeptidase	R.ELINSPANVLTPAVLAEEAAK.V	2	2149.18	78.05	3.25707	2	2	0.98	1	5746492	5847962	0.98	0	15N
AT2G24200.1	cytosol aminopeptidase	K.GLTFDSGGYNIK.T	2	1270.63	26.23	0.472208	1	1	0.89	3	3117455	2254675	1.38	0	15N
AT2G24200.1	cytosol aminopeptidase	K.VQWMHIDMAGPVWNEK.K	3	1939.92	23.19	5.05177	1	1	0.85	1	6229334	3915023	1.59	0	15N
AT2G24200.1	cytosol aminopeptidase	K.VDAHLSGLLAQVSSEEDFTGKPGQ*STVLR.L	4	3041.58	27.51	13.2499	1	1	0.9	1	7667993	6311820	1.21	0	15N
AT2G24200.1	cytosol aminopeptidase	K.LSSVSALASGIVLGLFEDGR.Y	3	1990.09	36.73	6.63289	4	4	0.78	1	2250291	2131645	0.8775	0.34529	15N
AT2G24200.1	cytosol aminopeptidase	R.MPLEESYWEMMK.S	2	1572.68	49.92	5.84991	1	1	0.85	1	3884532	2886601	1.35	0	15N
AT2G24200.1	cytosol aminopeptidase	R.LTLADALVYACNQGVDK.I	2	1849.94	60.79	5.35155	2	2	0.9	3	3020247	3948919	0.97	0.296985	15N
AT2G24200.1	cytosol aminopeptidase	K.TGPGCSIELMK.F	2	1191.58	28.68	5.62283	1	1	0.93	1	3142095	1900612	1.65	0	15N
AT2G24200.1	cytosol aminopeptidase	K.VDAHLSGLLAQVSSEEDFTGKPGQSTVLR.L	4	3040.58	40.33	7.72885	1	1	0.88	1	9275241	6686902	1.39	0	15N
AT2G24940.1	AtMAPR2 (Arabidopsis thaliana membrane-associated progesterone binding protein 2); heme binding	K.SFYGSGGDYSMFAGK.D	2	1572.67	42.46	2.54346	1	1	0.95	1	1854883	2081268	0.89	0	14N
AT2G24940.1	AtMAPR2 (Arabidopsis thaliana membrane-associated progesterone binding protein 2); heme binding	K.SFYGSGGDYSMFAGK.D	2	1572.67	60.04	3.56084	1	1	0.88	1	2005618	1375232	1.46	0	15N
AT2G25450.1	2-oxoglutarate-dependent dioxygenase, putative	K.LAELMFEILSEALGLSPNHLK.E	3	2324.26	25.78	3.48499	2	2	0.84	1	3044471	4874722	0.62	0	14N
AT2G25450.1	2-oxoglutarate-dependent dioxygenase, putative	K.YHSNADLYESPAASWR.D	3	1865.85	28.75	3.48368	1	1	0.89	1	762521	535209	1.42	0	15N
AT2G25450.1	2-oxoglutarate-dependent dioxygenase, putative	K.LAELMFEILSEALGLSPN*HLK.E	3	2325.26	24.33	8.25722	1	1	0.71	1	2396344	2403639	1	0	15N
AT2G25450.1	2-oxoglutarate-dependent dioxygenase, putative	K.LAELMFEILSEALGLSPNHLK.E	3	2324.27	25.34	5.29202	2	2	0.85	1	3263781	2609807	1.25	0	15N
AT2G27020.1	PAG1; endopeptidase/ peptidase/ threonine-type endopeptidase	R.VFQIEYAAK.A	2	1067.58	28.64	2.06075	1	1	0.86	1	3743235	2674792	1.4	0	14N
AT2G27020.1	PAG1; endopeptidase/ peptidase/ threonine-type endopeptidase	R.HAGMAVAGLAADGR.Q	3	1295.66	25.51	9.03023	1	1	0.95	1	1049158	893895	1.17	0	15N
AT2G27020.1	PAG1; endopeptidase/ peptidase/ threonine-type endopeptidase	R.SYESVYGDAVPVK.E	2	1412.7	41.07	5.09666	1	1	0.87	1	1145601	929806	1.23	0	15N
AT2G27020.1	PAG1; endopeptidase/ peptidase/ threonine-type endopeptidase	K.AVDNSGTVVGIK.C	2	1158.63	34.39	-0.431543	1	1	0.92	1	310196	331929	0.93	0	15N
AT2G27100.1	SE (SERRATE); DNA binding / transcription factor	K.GLEGVELLDTLVTYLWR.V	3	1976.08	30.95	6.78114	1	1	0.76	1	211514	276710	0.76	0	15N
AT2G27510.1	ATFD3 (ferredoxin 3); 2 iron, 2 sulfur cluster binding / electron carrier/ iron-sulfur cluster binding	K.GYVLTCVAYPQSDCVIHTHKETELF.-	4	2967.42	21.41	4.46514	1	1	0.93	1	3539821	3532105	1	0	14N
AT2G27510.1	ATFD3 (ferredoxin 3); 2 iron, 2 sulfur cluster binding / electron carrier/ iron-sulfur cluster binding	K.LLGPDGQEDEFEVQDDQYILDAAEEAGVDLPYSCR.A	3	3956.78	34.9	1.67993	1	1	0.95	1	3400932	4116111	0.83	0	14N
AT2G27510.1	ATFD3 (ferredoxin 3); 2 iron, 2 sulfur cluster binding / electron carrier/ iron-sulfur cluster binding	K.LLGPDGQEDEFEVQDDQYILDAAEEAGVDLPYSCR.A	3	3957.77	53.58	-1.69606	1	1	0.93	1	4506068	3718471	1.21	0	15N
AT2G27510.1	ATFD3 (ferredoxin 3); 2 iron, 2 sulfur cluster binding / electron carrier/ iron-sulfur cluster binding	R.AGACSTCAGQIVSGNVDQSDGSFLEDSHLEK.G	3	3238.44	62.03	5.46562	1	1	0.92	1	3494096	2646638	1.32	0	15N
AT2G27710.1	60S acidic ribosomal protein P2 (RPP2B)	K.VVAAYLLAVLSGK.A	2	1302.81	62.64	6.9082	2	2	0.87	1	7849382	10095175	0.78	0	14N
AT2G27710.1	60S acidic ribosomal protein P2 (RPP2B)	K.GKDLAELIAAGR.E	2	1212.69	71.06	2.14399	3	3	0.89	4	2582820	3705606	0.773333	0.0635085	14N
AT2G27710.1	60S acidic ribosomal protein P2 (RPP2B)	K.VVAAYLLAVLSGK.A	2	1302.81	118.78	7.98281	2	2	0.94	1	11057191	9691714	1.14	0	15N
AT2G27710.1	60S acidic ribosomal protein P2 (RPP2B)	K.GKDLAELIAAGR.E	2	1212.69	60.34	1.81415	4	4	0.95	4	3671338	3480556	1.22	0.196299	15N
AT2G27720.1	60S acidic ribosomal protein P2 (RPP2A)	K.VVAAFLLAVLSGK.A	2	1286.81	46.92	8.31517	2	2	0.83	3	2081351	2554027	0.81	0	14N
AT2G27720.1	60S acidic ribosomal protein P2 (RPP2A)	K.ASPTTGDIKDILGSVGAETEDSQIELLLK.E	3	2999.59	41.81	7.86781	2	2	0.88	1	7028491	10172997	0.69	0	14N
AT2G27720.1	60S acidic ribosomal protein P2 (RPP2A)	K.VVAAFLLAVLSGK.A	2	1286.81	70.9	6.06153	2	2	0.95	3	2204806	1931682	1.14	0	15N
AT2G27720.1	60S acidic ribosomal protein P2 (RPP2A)	K.ASPTTGDIKDILGSVGAETEDSQ*IELLLK.E	3	3000.59	28.76	13.031	1	1	0.91	1	5532501	6683977	0.83	0	15N
AT2G27720.1	60S acidic ribosomal protein P2 (RPP2A)	K.ASPTTGDIKDILGSVGAETEDSQIELLLK.E	3	2999.58	39.24	6.53429	2	2	0.91	1	6813063	6957517	0.98	0	15N
AT2G27720.1	60S acidic ribosomal protein P2 (RPP2A)	K.LASVPSGGGGGVAVASATSGGGGGGGAPAAESK.K	3	2597.28	34.55	2.92614	1	1	0.93	3	2112119	2002936	1.05	0	15N
AT2G28000.1	CPN60A (CHAPERONIN-60ALPHA); ATP binding / protein binding	K.VGAATETELEDR.K	2	1289.63	43.74	12.0191	1	1	0.87	1	1081222	971475	1.11	0	14N
AT2G28000.1	CPN60A (CHAPERONIN-60ALPHA); ATP binding / protein binding	K.ITAIKDIIPILEK.T	3	1465.93	23.38	5.11624	1	1	0.94	1	1337105	1778680	0.75	0	14N
AT2G28000.1	CPN60A (CHAPERONIN-60ALPHA); ATP binding / protein binding	K.VGAATETELEDR.K	2	1289.62	56.16	3.79958	1	1	0.87	1	1797077	1169287	1.54	0	15N
AT2G28000.1	CPN60A (CHAPERONIN-60ALPHA); ATP binding / protein binding	R.AIELPNAMENAGAALIR.E	2	1752.94	96.44	7.87255	1	1	0.86	1	1561463	2255669	0.69	0	15N
AT2G28760.2	NAD-dependent epimerase/dehydratase family protein	R.GEALTVQKPGTQTR.S	3	1484.81	21.63	4.31034	1	1	0.96	4	931755	1170011	0.8	0	14N
AT2G28760.2	NAD-dependent epimerase/dehydratase family protein	R.VVSNFIAQALR.G	2	1216.71	97.74	6.32859	1	1	0.78	4	3726115	2674552	1.39	0	15N
AT2G28760.2	NAD-dependent epimerase/dehydratase family protein	R.GEALTVQKPGTQTR.S	3	1484.81	37.72	3.83889	2	2	0.99	4	1648955	1310025	1.26	0	15N
AT2G28760.2	NAD-dependent epimerase/dehydratase family protein	K.LREGLPLMEEDFR.L	3	1603.82	24.82	3.36698	1	1	0.95	4	10604674	3363984	3.15	0	15N
AT2G28760.2	NAD-dependent epimerase/dehydratase family protein	K.TNVIGTLNMLGLAK.R	2	1443.82	45.4	2.70117	1	1	0.88	4	2551615	2605900	0.98	0	15N
AT2G29550.1	TUB7; structural constituent of cytoskeleton	K.GHYTEGAELIDSVLDVVR.K	3	1972.02	26.69	11.1562	1	1	0.88	5	4142796	5108687	0.81	0	14N
AT2G29550.1	TUB7; structural constituent of cytoskeleton	K.MASTFIGNSTSIQEMFR.R	2	1918.91	74.38	6.14936	2	2	0.83	6	4210376	4859056	0.87	0	14N
AT2G29550.1	TUB7; structural constituent of cytoskeleton	R.VNVYYNEASCGR.Y	2	1430.64	76.03	2.23677	1	1	0.91	3	531886	814619	0.65	0	14N
AT2G29550.1	TUB7; structural constituent of cytoskeleton	R.AVLMDLEPGTMDSVR.S	2	1632.81	37.34	9.12547	1	1	0.9	2	2706276	2017291	1.34	0	15N
AT2G29550.1	TUB7; structural constituent of cytoskeleton	R.MMMTFSVFPSPK.V	2	1401.65	31.53	-2.85376	1	1	0.93	3	3399168	3213086	1.06	0	15N
AT2G29550.1	TUB7; structural constituent of cytoskeleton	K.GHYTEGAELIDSVLDVVR.K	3	1972.01	57.53	5.37526	3	3	0.77	5	13077094	9934323	1.32	0	15N
AT2G29550.1	TUB7; structural constituent of cytoskeleton	K.MASTFIGNSTSIQEMFR.R	2	1918.91	90.84	3.80426	2	2	0.83	6	7742924	5201667	1.49	0	15N
AT2G29550.1	TUB7; structural constituent of cytoskeleton	R.VNVYYNEASCGR.Y	2	1430.64	34.56	2.44647	1	1	0.87	3	1016661	1001925	1.01	0	15N
AT2G30050.1	transducin family protein / WD-40 repeat family protein	R.IDQ*AHPVGVTSVSWAPATAPGALVSSGLLDPVYK.L	3	3403.8	43.6	7.7561	1	1	0.86	1	1413314	1764252	0.8	0	15N
AT2G30110.1	ATUBA1; ubiquitin activating enzyme/ ubiquitin-protein ligase	K.AVLNPMAAMFGGIVGQEVVK.A	3	2030.09	27.56	8.07851	1	1	0.85	2	2088985	3059510	0.68	0	14N
AT2G30110.1	ATUBA1; ubiquitin activating enzyme/ ubiquitin-protein ligase	K.LLNFKPLR.E	3	999.636	22.65	5.00185	1	1	0.94	1	1062633	1263340	0.84	0	14N
AT2G30110.1	ATUBA1; ubiquitin activating enzyme/ ubiquitin-protein ligase	K.AEAGRFPVAGSEEDAQK.L	3	1760.85	36.58	4.60008	1	1	0.87	1	568520	676882	0.84	0	14N
AT2G30110.1	ATUBA1; ubiquitin activating enzyme/ ubiquitin-protein ligase	K.LQDLNNAVVVSSLTK.S	2	1599.9	55.58	5.00034	1	1	0.91	1	1039720	1158312	0.9	0	15N
AT2G30110.1	ATUBA1; ubiquitin activating enzyme/ ubiquitin-protein ligase	K.AVLNPMAAMFGGIVGQEVVK.A	3	2030.09	40.57	7.93073	2	2	0.89	2	2635401	2551583	1.03	0	15N
AT2G30110.1	ATUBA1; ubiquitin activating enzyme/ ubiquitin-protein ligase	R.LFASNVLISGMHGLGAEIAK.N	3	2027.11	27.88	7.7944	1	1	0.95	1	2185528	2016507	1.08	0	15N
AT2G30110.1	ATUBA1; ubiquitin activating enzyme/ ubiquitin-protein ligase	K.LLNFKPLR.E	3	999.638	21.03	7.60281	1	1	0.88	1	1078370	893166	1.21	0	15N
AT2G30490.1	C4H (CINNAMATE-4-HYDROXYLASE); trans-cinnamate 4-monooxygenase	K.ILVNAWWLANNPNSWK.K	3	1925.02	25.54	7.22077	1	1	0.83	1	1371711	1616372	0.85	0	14N
AT2G30490.1	C4H (CINNAMATE-4-HYDROXYLASE); trans-cinnamate 4-monooxygenase	R.LAQSFEYNYGDFIPILRPFLR.G	3	2558.36	33	9.30291	1	1	0.91	1	5264822	6210979	0.85	0	14N
AT2G30490.1	C4H (CINNAMATE-4-HYDROXYLASE); trans-cinnamate 4-monooxygenase	K.LAGYDIPAESK.I	2	1162.6	29.13	7.31123	1	1	0.8	1	1140845	1318951	0.86	0	14N
AT2G30490.1	C4H (CINNAMATE-4-HYDROXYLASE); trans-cinnamate 4-monooxygenase	R.LAQSFEYNYGDFIPILRPFLR.G	3	2558.36	36.43	6.95764	1	1	0.97	1	5546535	4428445	1.25	0	15N
AT2G30660.1	3-hydroxyisobutyryl-coenzyme A hydrolase, putative / CoA-thioester hydrolase, putative	M.ASQSQ*VLVEEK.S	4	1218.64	23.56	11.1245	1	1	0.71	4	41276	2396	17.23	0	14N
AT2G30860.1	ATGSTF9 (GLUTATHIONE S-TRANSFERASE PHI 9); copper ion binding / glutathione binding / glutathione peroxidase/ glutathione transferase	K.VYGPHFASPK.R	3	1101.57	23	5.356	1	1	1	2	25920202	35312431	0.73	0	14N
AT2G30860.1	ATGSTF9 (GLUTATHIONE S-TRANSFERASE PHI 9); copper ion binding / glutathione binding / glutathione peroxidase/ glutathione transferase	K.ESEEKLAGVLDVYEAHLSK.S	3	2116.09	27.18	5.71813	1	1	0.83	2	4338554	5864847	0.74	0	14N
AT2G30860.1	ATGSTF9 (GLUTATHIONE S-TRANSFERASE PHI 9); copper ion binding / glutathione binding / glutathione peroxidase/ glutathione transferase	K.LAGVLDVYEAHLSK.S	2	1513.83	62.95	4.558	3	3	0.9	2	42219420	57907004	0.74	0.0173205	14N
AT2G30860.1	ATGSTF9 (GLUTATHIONE S-TRANSFERASE PHI 9); copper ion binding / glutathione binding / glutathione peroxidase/ glutathione transferase	K.YLAGDFVSLADLAHLPFTDYLVGPIGK.A	3	2891.53	65.86	5.49884	9	9	0.82	1	138335456	197266220	0.7	0	14N
AT2G30860.1	ATGSTF9 (GLUTATHIONE S-TRANSFERASE PHI 9); copper ion binding / glutathione binding / glutathione peroxidase/ glutathione transferase	K.QPAYLALQPFGTVPAVVDGDYK.I	2	2348.23	48.82	6.00457	1	1	0.89	2	4778619	5872289	0.81	0	14N
AT2G30860.1	ATGSTF9 (GLUTATHIONE S-TRANSFERASE PHI 9); copper ion binding / glutathione binding / glutathione peroxidase/ glutathione transferase	K.HVSAWWDDISSRPAWK.E	3	1939.95	35.51	6.39195	2	2	0.91	1	14159602	15519938	0.91	0	14N
AT2G30860.1	ATGSTF9 (GLUTATHIONE S-TRANSFERASE PHI 9); copper ion binding / glutathione binding / glutathione peroxidase/ glutathione transferase	R.ALVTLIEK.G	2	885.565	40.7	3.83937	2	2	0.96	2	23984391	32955746	0.73	0	14N
AT2G30860.1	ATGSTF9 (GLUTATHIONE S-TRANSFERASE PHI 9); copper ion binding / glutathione binding / glutathione peroxidase/ glutathione transferase	K.GVAFETIPVDLMK.G	2	1418.76	68.57	5.14535	2	2	0.97	2	30598362	43668682	0.7	0	14N
AT2G30860.1	ATGSTF9 (GLUTATHIONE S-TRANSFERASE PHI 9); copper ion binding / glutathione binding / glutathione peroxidase/ glutathione transferase	K.LAGVLDVYEAHLSK.S	2	1513.83	60.09	2.84049	3	3	0.87	2	7219028	5997896	1.10667	0.080829	15N
AT2G30860.1	ATGSTF9 (GLUTATHIONE S-TRANSFERASE PHI 9); copper ion binding / glutathione binding / glutathione peroxidase/ glutathione transferase	K.YLAGDFVSLADLAHLPFTDYLVGPIGK.A	3	2891.53	67.65	5.3605	9	9	0.82	1	183814589	186948420	0.98	0	15N
AT2G30860.1	ATGSTF9 (GLUTATHIONE S-TRANSFERASE PHI 9); copper ion binding / glutathione binding / glutathione peroxidase/ glutathione transferase	K.GEHKQPAYLALQPFGTVPAVVDGDYK.I	3	2799.44	37.89	4.60808	1	1	0.96	2	3440296	3282501	1.05	0	15N
AT2G30860.1	ATGSTF9 (GLUTATHIONE S-TRANSFERASE PHI 9); copper ion binding / glutathione binding / glutathione peroxidase/ glutathione transferase	R.ALVTLIEK.G	2	885.567	56.44	5.87198	2	2	0.96	2	28101915	27399833	1.03	0	15N
AT2G30860.1	ATGSTF9 (GLUTATHIONE S-TRANSFERASE PHI 9); copper ion binding / glutathione binding / glutathione peroxidase/ glutathione transferase	K.GVAFETIPVDLMK.G	2	1418.76	71.84	2.60792	4	4	0.93	2	60536385	56037238	1.08	0	15N
AT2G30860.1	ATGSTF9 (GLUTATHIONE S-TRANSFERASE PHI 9); copper ion binding / glutathione binding / glutathione peroxidase/ glutathione transferase	K.VYGPHFASPK.R	3	1101.57	28.34	2.99573	2	2	0.99	2	32006479	32150338	1.15	0.212132	15N
AT2G30860.1	ATGSTF9 (GLUTATHIONE S-TRANSFERASE PHI 9); copper ion binding / glutathione binding / glutathione peroxidase/ glutathione transferase	K.QPAYLALQPFGTVPAVVDGDYK.I	2	2348.22	68.33	4.93993	2	2	0.93	2	12239830	10493991	1.17	0	15N
AT2G30870.1	GSTF10 (HALIANA GLUTATHIONE S-TRANSFERASE PHI 10); copper ion binding / glutathione binding / glutathione transferase	K.NEYLAGDFVSLADLAHLPFTEYLVGPIGK.A	3	3148.64	64.9	6.66959	5	5	0.85	1	23788382	30005065	0.792	0.00447214	14N
AT2G30870.1	GSTF10 (HALIANA GLUTATHIONE S-TRANSFERASE PHI 10); copper ion binding / glutathione binding / glutathione transferase	K.LAEVLDVYEAQLSKN*EYLAGDFVSLADLAHLPFTEYLVGPIGK.A	4	4708.49	21.95	13.0192	1	1	0.78	1	4052924	5726770	0.71	0	14N
AT2G30870.1	GSTF10 (HALIANA GLUTATHIONE S-TRANSFERASE PHI 10); copper ion binding / glutathione binding / glutathione transferase	M.VLTIYAPLFASSK.R	2	1408.81	34.36	6.88527	2	2	0.83	1	7676452	10587686	0.73	0	14N
AT2G30870.1	GSTF10 (HALIANA GLUTATHIONE S-TRANSFERASE PHI 10); copper ion binding / glutathione binding / glutathione transferase	K.IPVLVDGDYK.I	2	1117.61	37.08	2.41587	1	1	0.97	1	14003530	17209173	0.81	0	14N
AT2G30870.1	GSTF10 (HALIANA GLUTATHIONE S-TRANSFERASE PHI 10); copper ion binding / glutathione binding / glutathione transferase	K.GVSFETVNVDLMK.G	2	1437.74	50.43	8.0683	1	1	0.85	1	2525084	3693670	0.68	0	14N
AT2G30870.1	GSTF10 (HALIANA GLUTATHIONE S-TRANSFERASE PHI 10); copper ion binding / glutathione binding / glutathione transferase	K.LAEVLDVYEAQ*LSKNEYLAGDFVSLADLAHLPFTEYLVGPIGK.A	4	4709.46	34.96	5.76528	1	1	0.78	1	4052924	5726770	0.71	0	14N
AT2G30870.1	GSTF10 (HALIANA GLUTATHIONE S-TRANSFERASE PHI 10); copper ion binding / glutathione binding / glutathione transferase	K.LAEVLDVYEAQLSK.N	2	1576.85	81	7.61014	1	1	0.74	1	2215147	3025497	0.73	0	14N
AT2G30870.1	GSTF10 (HALIANA GLUTATHIONE S-TRANSFERASE PHI 10); copper ion binding / glutathione binding / glutathione transferase	M.VLTIYAPLFASSK.R	2	1408.81	48.85	6.10447	2	2	0.87	1	13034168	12351984	1.06	0	15N
AT2G30870.1	GSTF10 (HALIANA GLUTATHIONE S-TRANSFERASE PHI 10); copper ion binding / glutathione binding / glutathione transferase	K.IPVLVDGDYK.I	2	1117.61	33.18	3.04221	1	1	0.98	1	14164621	11647569	1.22	0	15N
AT2G30870.1	GSTF10 (HALIANA GLUTATHIONE S-TRANSFERASE PHI 10); copper ion binding / glutathione binding / glutathione transferase	K.GVSFETVNVDLMK.G	2	1437.73	64.16	6.19033	1	1	0.93	1	5996039	5318813	1.13	0	15N
AT2G30870.1	GSTF10 (HALIANA GLUTATHIONE S-TRANSFERASE PHI 10); copper ion binding / glutathione binding / glutathione transferase	K.NEYLAGDFVSLADLAHLPFTEYLVGPIGK.A	3	3148.64	63.09	6.32023	5	5	0.89	1	46818281	39346140	1.19	0	15N
AT2G30870.1	GSTF10 (HALIANA GLUTATHIONE S-TRANSFERASE PHI 10); copper ion binding / glutathione binding / glutathione transferase	K.LAEVLDVYEAQLSK.N	2	1576.85	93.67	5.26368	2	2	0.98	1	7604393	6227629	1.22	0	15N
AT2G30930.1	unknown protein	K.TEAAAAPDKASGVSTQAK.D	3	1701.87	30.38	3.58431	1	1	0.99	1	499678	355092	1.41	0	15N
AT2G30930.1	unknown protein	K.ESVTSTAESVTASLTDAEK.T	2	1924.93	71.15	5.35087	2	2	0.93	1	2677877	1845241	1.45	0	15N
AT2G30970.1	ASP1 (ASPARTATE AMINOTRANSFERASE 1); L-aspartate:2-oxoglutarate aminotransferase	K.SVEPAPKDPILGVTEAFLADPSPEK.V	3	2607.38	27.47	6.4632	1	1	0.91	1	3339314	4974896	0.67	0	14N
AT2G30970.1	ASP1 (ASPARTATE AMINOTRANSFERASE 1); L-aspartate:2-oxoglutarate aminotransferase	R.ISMAGVTTGNVGYLANAIHEVTK.S	3	2345.22	23.18	4.90361	1	1	0.81	1	6846756	7184647	0.95	0	14N
AT2G30970.1	ASP1 (ASPARTATE AMINOTRANSFERASE 1); L-aspartate:2-oxoglutarate aminotransferase	K.GLDFSALMDDVK.N	2	1309.64	38.32	6.18495	1	1	0.87	1	1697532	1818825	0.93	0	14N
AT2G30970.1	ASP1 (ASPARTATE AMINOTRANSFERASE 1); L-aspartate:2-oxoglutarate aminotransferase	R.IAAVQTLSGTGACR.L	2	1403.73	65.21	3.06327	1	1	0.97	1	834471	996084	0.84	0	14N
AT2G30970.1	ASP1 (ASPARTATE AMINOTRANSFERASE 1); L-aspartate:2-oxoglutarate aminotransferase	R.LAGSTFMEYLPMGGSAK.M	2	1758.85	63.66	4.20732	1	1	0.91	1	2535883	2753498	0.92	0	14N
AT2G30970.1	ASP1 (ASPARTATE AMINOTRANSFERASE 1); L-aspartate:2-oxoglutarate aminotransferase	K.SVEPAPKDPILGVTEAFLADPSPEK.V	3	2606.37	23.83	4.98781	1	1	0.96	1	4746202	5269805	0.9	0	15N
AT2G30970.1	ASP1 (ASPARTATE AMINOTRANSFERASE 1); L-aspartate:2-oxoglutarate aminotransferase	R.IAAVQTLSGTGACR.L	2	1403.73	52.97	4.06062	1	1	0.97	1	1051094	918800	1.14	0	15N
AT2G30970.1	ASP1 (ASPARTATE AMINOTRANSFERASE 1); L-aspartate:2-oxoglutarate aminotransferase	R.LAGSTFMEYLPMGGSAK.M	2	1758.85	66.58	3.24077	1	1	0.89	1	2472194	2321171	1.07	0	15N
AT2G31390.1	pfkB-type carbohydrate kinase family protein	K.GAVDPFHVNAVDTTGAGDSFVGALLNQ*IVDDR.S	3	3270.62	25.47	8.80576	1	1	0.94	1	11320685	17906235	0.63	0	14N
AT2G31390.1	pfkB-type carbohydrate kinase family protein	K.GAVDPFHVNAVDTTGAGDSFVGALLNQIVDDR.S	3	3269.61	68.74	3.63959	2	2	0.92	1	13995435	19655080	0.705	0.00707107	14N
AT2G31390.1	pfkB-type carbohydrate kinase family protein	K.NGVDDQGINFDTGAR.T	2	1577.72	93.92	3.61282	1	1	0.96	1	900537	1278082	0.7	0	14N
AT2G31390.1	pfkB-type carbohydrate kinase family protein	K.GAVDPFHVN*AVDTTGAGDSFVGALLNQIVDDR.S	3	3272.63	41.61	9.81194	1	1	0.87	1	20037830	17345723	1.16	0	15N
AT2G31390.1	pfkB-type carbohydrate kinase family protein	K.GAVDPFHVNAVDTTGAGDSFVGALLN*QIVDDR.S	3	3272.63	61.14	9.81194	1	1	0.87	1	20037830	17345723	1.16	0	15N
AT2G31390.1	pfkB-type carbohydrate kinase family protein	K.VSDVELEFLTGSNK.I	2	1536.77	35.91	-1.10621	1	1	0.65	1	4186611	168617591	0.02	0	15N
AT2G31390.1	pfkB-type carbohydrate kinase family protein	K.GAVDPFHVNAVDTTGAGDSFVGALLNQIVDDR.S	3	3269.62	57.71	4.06777	3	3	0.87	1	23315969	17609064	1.32	0	15N
AT2G31390.1	pfkB-type carbohydrate kinase family protein	R.NPSADMLLRPDELNLDLIR.S	3	2194.17	21.88	7.7023	1	1	0.97	1	15669803	12007594	1.3	0	15N
AT2G31390.1	pfkB-type carbohydrate kinase family protein	K.NGVDDQGINFDTGAR.T	2	1577.72	87.86	4.24665	1	1	0.94	1	1289275	951656	1.35	0	15N
AT2G31570.1	ATGPX2 (GLUTATHIONE PEROXIDASE 2); glutathione peroxidase	K.DIGGNDVSLDQYK.G	2	1422.68	61.86	4.00655	1	1	0.91	1	1510963	1593318	0.95	0	14N
AT2G31570.1	ATGPX2 (GLUTATHIONE PEROXIDASE 2); glutathione peroxidase	K.DIGGNDVSLDQYK.G	2	1422.68	64.74	3.23336	1	1	0.92	1	1461825	1353876	1.08	0	15N
AT2G31610.1	40S ribosomal protein S3 (RPS3A)	R.FKFPVDSVELYAEK.V	3	1670.88	38.29	7.54101	1	1	0.88	2	5979537	5636001	1.06	0	14N
AT2G31610.1	40S ribosomal protein S3 (RPS3A)	R.GLCAIAQAESLR.Y	2	1287.67	60.69	3.33937	1	1	0.84	3	3799198	4638996	0.82	0	14N
AT2G31610.1	40S ribosomal protein S3 (RPS3A)	R.ELAEDGYSGVEVR.V	2	1422.67	40.95	1.96813	1	1	0.88	3	1761063	2188728	0.8	0	14N
AT2G31610.1	40S ribosomal protein S3 (RPS3A)	R.FKFPVDSVELYAEK.V	3	1670.87	35.61	5.74553	1	1	0.85	2	8406739	5752730	1.46	0	15N
AT2G31610.1	40S ribosomal protein S3 (RPS3A)	R.GLCAIAQAESLR.Y	2	1287.67	44.82	3.72767	2	2	0.89	3	4330058	3805698	1.14	0	15N
AT2G31610.1	40S ribosomal protein S3 (RPS3A)	R.ELAEDGYSGVEVR.V	2	1422.68	65.45	4.92032	1	1	0.94	3	2843846	2199297	1.29	0	15N
AT2G31610.1	40S ribosomal protein S3 (RPS3A)	K.LLGGLAVR.R	2	797.525	46.23	6.14405	2	2	0.95	3	5949366	4845547	1.23	0	15N
AT2G31610.1	40S ribosomal protein S3 (RPS3A)	K.DGYMVSSGQPTK.E	2	1268.59	38.49	5.43916	1	1	0.94	3	223504	190731	1.17	0	15N
AT2G31610.1	40S ribosomal protein S3 (RPS3A)	K.FKDGYMVSSGQPTK.E	3	1543.75	24.13	4.66399	1	1	0.98	3	3739485	3343549	1.12	0	15N
AT2G31990.1	exostosin family protein	R.FN*LEIIK.D	2	876.509	45.14	6.04675	1	1	0.97	1	15769164	10423067	1.51	0	15N
AT2G32060.1	40S ribosomal protein S12 (RPS12C)	K.DFGEETTALNIVK.K	2	1435.73	52.47	3.90046	1	1	0.89	1	1315183	1266922	1.04	0	15N
AT2G32220.1	60S ribosomal protein L27 (RPL27A)	K.AVILLQGR.Y	2	868.559	41.51	1.727	1	1	0.88	4	1982853	2362943	0.84	0	14N
AT2G32220.1	60S ribosomal protein L27 (RPL27A)	K.AVILLQGR.Y	2	868.56	42.32	3.22374	1	1	0.87	4	2732855	2641579	1.03	0	15N
AT2G32240.1	FUNCTIONS IN: molecular_function unknown; INVOLVED IN: response to cadmium ion; LOCATED IN: plasma membrane; EXPRESSED IN: 25 plant structures; EXPRESSED DURING: 13 growth stages; CONTAINS InterPro DOMAIN/s: Prefoldin (InterPro:IPR009053); BEST Arabidopsis thaliana protein match is: unknown protein (TAIR:AT1G05320.3); Has 221693 Blast hits to 95553 proteins in 2574 species: Archae - 2848; Bacteri…	K.ELQAAQSSIDEQK.Q	2	1445.71	24.26	2.42096	1	1	0.93	1	124784	139794	0.89	0	14N
AT2G32240.1	FUNCTIONS IN: molecular_function unknown; INVOLVED IN: response to cadmium ion; LOCATED IN: plasma membrane; EXPRESSED IN: 25 plant structures; EXPRESSED DURING: 13 growth stages; CONTAINS InterPro DOMAIN/s: Prefoldin (InterPro:IPR009053); BEST Arabidopsis thaliana protein match is: unknown protein (TAIR:AT1G05320.3); Has 221693 Blast hits to 95553 proteins in 2574 species: Archae - 2848; Bacteri…	K.SSSLEAALNIATENEKELTENLNAVTSEK.K	3	3104.57	22.17	9.95315	1	1	0.71	1	916119	1025113	0.89	0	15N
AT2G32240.1	FUNCTIONS IN: molecular_function unknown; INVOLVED IN: response to cadmium ion; LOCATED IN: plasma membrane; EXPRESSED IN: 25 plant structures; EXPRESSED DURING: 13 growth stages; CONTAINS InterPro DOMAIN/s: Prefoldin (InterPro:IPR009053); BEST Arabidopsis thaliana protein match is: unknown protein (TAIR:AT1G05320.3); Has 221693 Blast hits to 95553 proteins in 2574 species: Archae - 2848; Bacteri…	K.ELQAAQSSIDEQK.Q	2	1445.71	34.73	4.35773	1	1	0.97	1	243709	143894	1.69	0	15N
AT2G33040.1	ATP synthase gamma chain, mitochondrial (ATPC)	R.QASITTELIEIISGASALEAAK.-	3	2215.22	60.55	7.6291	2	2	0.83	1	4038439	5604520	0.72	0	14N
AT2G33040.1	ATP synthase gamma chain, mitochondrial (ATPC)	R.GLWQPFTALLGDNPSIDVK.K	2	2070.1	74.91	5.26548	1	1	0.93	1	1995308	3436108	0.58	0	14N
AT2G33040.1	ATP synthase gamma chain, mitochondrial (ATPC)	K.GLCGGINSTVVK.V	2	1203.64	61.1	4.15408	1	1	0.89	1	1735811	1444723	1.2	0	15N
AT2G33040.1	ATP synthase gamma chain, mitochondrial (ATPC)	R.QASITTELIEIISGASALEAAK.-	3	2215.22	39.59	7.6291	2	2	0.95	1	5243122	4877143	1.08	0	15N
AT2G33040.1	ATP synthase gamma chain, mitochondrial (ATPC)	R.GLWQPFTALLGDNPSIDVK.K	2	2070.1	61.07	6.0867	1	1	0.91	1	3361388	4049533	0.83	0	15N
AT2G33070.1	NSP2 (NITRILE SPECIFIER PROTEIN 2)	K.HLYVFDLETR.T	2	1291.67	45.1	4.56775	3	3	0.97	3	44247571	59812961	0.74	1.05367e-08	14N
AT2G33070.1	NSP2 (NITRILE SPECIFIER PROTEIN 2)	R.GGAGLEVVQGK.V	2	1013.56	32.98	4.4398	1	1	0.84	4	489996	405902	1.21	0	15N
AT2G33070.1	NSP2 (NITRILE SPECIFIER PROTEIN 2)	K.HLYVFDLETR.T	2	1291.67	35.48	3.48388	5	5	0.93	3	68251782	56679849	1.18	0.0234521	15N
AT2G33070.1	NSP2 (NITRILE SPECIFIER PROTEIN 2)	K.LLTPVEQ*GPTPR.S	2	1307.72	60.9	3.9764	4	4	0.99	1	87502105	83446232	1.05	0	15N
AT2G33150.1	PKT3 (PEROXISOMAL 3-KETOACYL-COA THIOLASE 3); acetyl-CoA C-acyltransferase	K.GLPVLGVFR.T	2	956.597	39.77	8.57213	1	1	0.95	1	1587371	1927032	0.82	0	14N
AT2G33150.1	PKT3 (PEROXISOMAL 3-KETOACYL-COA THIOLASE 3); acetyl-CoA C-acyltransferase	R.TFAAVGVDPAIMGIGPAVAIPAAVK.A	3	2336.33	30.75	7.47029	1	1	0.91	1	3343143	5875208	0.57	0	14N
AT2G33150.1	PKT3 (PEROXISOMAL 3-KETOACYL-COA THIOLASE 3); acetyl-CoA C-acyltransferase	K.TNLNPSEVGDIVVGTVLAPGSQR.A	2	2322.25	33.38	9.12917	1	1	0.92	1	2221855	1852334	1.2	0	14N
AT2G33150.1	PKT3 (PEROXISOMAL 3-KETOACYL-COA THIOLASE 3); acetyl-CoA C-acyltransferase	R.TFAAVGVDPAIMGIGPAVAIPAAVK.A	3	2336.33	40.07	7.47029	1	1	0.76	1	3827727	6757808	0.57	0	15N
AT2G33150.1	PKT3 (PEROXISOMAL 3-KETOACYL-COA THIOLASE 3); acetyl-CoA C-acyltransferase	K.GLPVLGVFR.T	2	956.595	27.97	7.00406	1	1	0.92	1	1698999	2077604	0.82	0	15N
AT2G33210.1	HSP60-2 (HEAT SHOCK PROTEIN 60-2); ATP binding	R.SMVEASTSDYDKEK.L	2	1588.7	38.45	0.881223	1	1	0.97	1	207549	262152	0.79	0	14N
AT2G33210.1	HSP60-2 (HEAT SHOCK PROTEIN 60-2); ATP binding	K.AGIIDPLK.V	2	825.507	25.88	4.36097	1	1	0.8	2	1432601	2246225	0.64	0	14N
AT2G33210.1	HSP60-2 (HEAT SHOCK PROTEIN 60-2); ATP binding	R.GVEDLADAVK.V	2	1015.53	29.38	0.689298	1	1	0.85	2	1497042	1925303	0.78	0	14N
AT2G33210.1	HSP60-2 (HEAT SHOCK PROTEIN 60-2); ATP binding	K.IGVQIIQNALK.T	2	1195.73	26.45	-2.84344	1	1	0.95	2	5577943	6974156	0.8	0	14N
AT2G33210.1	HSP60-2 (HEAT SHOCK PROTEIN 60-2); ATP binding	R.NVIIEQSWGAPK.V	2	1341.73	33.6	10.9981	1	1	0.78	1	1232039	1516596	0.81	0	14N
AT2G33210.1	HSP60-2 (HEAT SHOCK PROTEIN 60-2); ATP binding	K.TLFNELEVVEGMK.I	2	1507.78	47.21	5.7038	1	1	0.86	2	7892517	5865810	1.35	0	14N
AT2G33210.1	HSP60-2 (HEAT SHOCK PROTEIN 60-2); ATP binding	R.SMVEASTSDYDKEK.L	2	1588.71	31.59	3.46195	1	1	0.97	1	284957	236345	1.21	0	15N
AT2G33210.1	HSP60-2 (HEAT SHOCK PROTEIN 60-2); ATP binding	K.LAVDTVVTNLQSR.A	2	1414.79	95.71	2.96865	1	1	0.87	1	1453919	1527627	0.95	0	15N
AT2G33210.1	HSP60-2 (HEAT SHOCK PROTEIN 60-2); ATP binding	K.SVAAGMNAMDLR.R	2	1234.59	59.57	2.10597	1	1	0.83	2	2521012	1751327	1.44	0	15N
AT2G33210.1	HSP60-2 (HEAT SHOCK PROTEIN 60-2); ATP binding	K.IGVQ*IIQ*NALK.T	3	1197.71	21.58	7.76485	1	1	0.98	2	13588860	3060468	4.44	0	15N
AT2G33210.1	HSP60-2 (HEAT SHOCK PROTEIN 60-2); ATP binding	K.IGVQIIQNALK.T	2	1195.74	35.58	4.51604	1	1	0.98	2	7107810	5388567	1.32	0	15N
AT2G33210.1	HSP60-2 (HEAT SHOCK PROTEIN 60-2); ATP binding	K.TLFNELEVVEGMK.I	2	1507.78	61.83	6.16806	1	1	0.94	2	8271163	6857409	1.21	0	15N
AT2G33210.1	HSP60-2 (HEAT SHOCK PROTEIN 60-2); ATP binding	K.LLEQDNPDLGYDAAK.G	2	1660.81	56.29	4.69653	1	1	0.81	2	2905736	2280159	1.27	0	15N
AT2G33490.1	hydroxyproline-rich glycoprotein family protein	R.ELGYSAPLVSR.S	3	1192.62	23.57	-17.9813	1	1	0.37	1	128827	23938	5.38	0	14N
AT2G33790.1	AGP30 (ARABINOGALACTAN PROTEIN30)	K.YAGVNNVQGAKPVK.D	3	1443.8	24.2	9.07333	1	1	0.98	1	459485	309601	1.48	0	15N
AT2G34480.1	60S ribosomal protein L18A (RPL18aB)	K.LWATNEVR.A	2	987.525	23.83	3.54423	1	1	0.89	1	3343563	2779159	1.2	0	15N
AT2G34480.1	60S ribosomal protein L18A (RPL18aB)	R.FHQYQVVGR.A	3	1132.59	20.18	5.56249	1	1	0.88	2	2894539	2553686	1.13	0	15N
AT2G34630.1	geranyl diphosphate synthase, putative / GPPS, putative / dimethylallyltransferase, putative / prenyl transferase, putative	R.NLGLAFQLIDDILDFTGTSASLGK.G	3	2508.33	21.01	4.18607	1	1	0.4	2	446982	531810	0.84	0	15N
AT2G34780.1	MEE22 (MATERNAL EFFECT EMBRYO ARREST 22)	K.AIENVNAEKSNLER.K	3	1587.82	28.06	-3.03264	1	1	0.97	1	2304463	3427454	0.67	0	14N
AT2G35120.1	glycine cleavage system H protein, mitochondrial, putative	K.VVEVNEELTESPGLVNSSPYEQGWIIK.V	3	3015.53	49.05	6.03545	2	2	0.79	1	5780685	6146466	0.94	0	15N
AT2G36160.1	40S ribosomal protein S14 (RPS14A)	K.ADRDESSPYAAMLAAQDVAQR.C	3	2264.07	34.41	3.88683	1	1	0.93	3	2544559	3393439	0.75	0	14N
AT2G36160.1	40S ribosomal protein S14 (RPS14A)	R.IEDVTPIPTDSTR.R	2	1442.73	35.06	0.138626	1	1	0.96	3	1706646	2066406	0.83	0	14N
AT2G36160.1	40S ribosomal protein S14 (RPS14A)	K.TPGPGAQSALR.A	2	1053.57	29.09	8.25768	1	1	0.92	3	173175	150740	1.15	0	15N
AT2G36160.1	40S ribosomal protein S14 (RPS14A)	R.IEDVTPIPTDSTR.R	2	1442.73	41.71	0.138626	1	1	0.96	3	3569563	2946091	1.21	0	15N
AT2G36160.1	40S ribosomal protein S14 (RPS14A)	K.ADRDESSPYAAMLAAQDVAQR.C	3	2264.06	30.91	3.04763	1	1	0.95	3	3929781	3163242	1.24	0	15N
AT2G36460.1	fructose-bisphosphate aldolase, putative	R.TVPAAVPAIVFLSGGQSEEEATR.N	2	2328.22	112.05	5.88436	4	4	0.92	3	32515230	44302875	0.7375	0.015	14N
AT2G36460.1	fructose-bisphosphate aldolase, putative	K.TKKPWSLSFSFGR.A	3	1539.84	27.09	4.80573	3	3	0.91	3	18214163	20557656	0.886667	0.0057735	14N
AT2G36460.1	fructose-bisphosphate aldolase, putative	K.KPWSLSFSFGR.A	3	1310.69	35.09	6.40886	1	1	0.88	3	3180433	3627251	0.88	0	14N
AT2G36460.1	fructose-bisphosphate aldolase, putative	K.FADELIANAAYIGTPGK.G	2	1749.91	81.82	5.20029	7	7	0.82	3	41766728	55448842	0.77	0.0341565	14N
AT2G36460.1	fructose-bisphosphate aldolase, putative	R.YAVICQEN*GLVPIVEPEILVDGSHDIQK.C	3	3135.61	72.73	7.62218	3	3	0.92	3	19577800	31285996	0.623333	0.0057735	14N
AT2G36460.1	fructose-bisphosphate aldolase, putative	K.GILAADESTGTIGK.R	2	1331.71	68.13	3.07877	1	1	0.88	5	5836950	6910002	0.84	0	14N
AT2G36460.1	fructose-bisphosphate aldolase, putative	R.YAVICQENGLVPIVEPEILVDGSHDIQK.C	3	3134.62	60.84	5.86996	4	4	0.98	3	84943708	115254106	0.7375	0.005	14N
AT2G36460.1	fructose-bisphosphate aldolase, putative	K.GILAADESTGTIGKR.L	2	1487.81	61.83	3.69673	3	3	0.96	5	5441990	7168668	0.743333	0.0288675	14N
AT2G36460.1	fructose-bisphosphate aldolase, putative	K.GTVELAGTNGETTTQ*GLDGLGDR.C	3	2262.08	33.98	6.18902	1	1	0.93	2	1376983	1658935	0.83	0	14N
AT2G36460.1	fructose-bisphosphate aldolase, putative	K.KPWSLSFSFGR.A	3	1310.69	35.81	6.17997	2	2	0.58	3	5419107	3238008	1.695	0.0353553	15N
AT2G36460.1	fructose-bisphosphate aldolase, putative	K.GILAADESTGTIGK.R	2	1331.71	87.56	3.7546	2	2	0.98	5	16381726	11968975	1.37	0	15N
AT2G36460.1	fructose-bisphosphate aldolase, putative	R.NLNAMNQLK.T	2	1044.55	30.23	3.15927	1	1	0.97	3	17353023	12429500	1.4	0	15N
AT2G36460.1	fructose-bisphosphate aldolase, putative	R.YAVICQENGLVPIVEPEILVDGSHDIQK.C	3	3134.62	55.86	4.8172	4	4	0.99	3	121617497	98258345	1.24	0	15N
AT2G36460.1	fructose-bisphosphate aldolase, putative	K.GILAADESTGTIGKR.L	2	1487.8	64.38	1.0082	3	3	0.98	5	6074200	3760707	1.28667	0.288675	15N
AT2G36460.1	fructose-bisphosphate aldolase, putative	R.TVPAAVPAIVFLSGGQSEEEATR.N	2	2328.21	109.58	4.42401	6	6	0.92	3	44216277	31886351	1.35	0.0619677	15N
AT2G36460.1	fructose-bisphosphate aldolase, putative	K.TKKPWSLSFSFGR.A	3	1539.84	42.34	4.93562	1	1	0.91	3	17644248	11162781	1.58	0	15N
AT2G36460.1	fructose-bisphosphate aldolase, putative	K.FADELIANAAYIGTPGK.G	2	1749.91	72.92	4.51454	5	5	0.91	3	58256521	45539510	1.292	0.0164317	15N
AT2G36460.1	fructose-bisphosphate aldolase, putative	R.YAVICQEN*GLVPIVEPEILVDGSHDIQK.C	3	3136.61	51.68	4.79827	5	5	0.96	3	6514617	5713202	1.184	0.0403733	15N
AT2G36460.1	fructose-bisphosphate aldolase, putative	K.IGVNEPSQLAIHENAYGLAR.Y	3	2151.13	22.31	4.69524	1	1	0.84	2	1535148	1625344	0.94	0	15N
AT2G36530.1	LOS2; copper ion binding / phosphopyruvate hydratase	K.YGQDATNVGDEGGFAPNIQENKEGLELLK.T	3	3105.51	61.24	5.76397	1	1	0.89	1	10295282	14225640	0.72	0	14N
AT2G36530.1	LOS2; copper ion binding / phosphopyruvate hydratase	K.LAMQEFMILPVGAASFK.E	2	1851.98	67.21	4.96768	3	3	0.86	1	40657141	60181026	0.696667	0.0288675	14N
AT2G36530.1	LOS2; copper ion binding / phosphopyruvate hydratase	K.AGAVVSGIPLYK.H	2	1173.69	40.33	4.6861	2	2	0.97	1	19062204	28076998	0.68	0	14N
AT2G36530.1	LOS2; copper ion binding / phosphopyruvate hydratase	K.VTAAVPSGASTGIYEALELR.D	2	2004.07	103.37	3.942	4	4	0.86	1	16500602	23757347	0.69	0	14N
AT2G36530.1	LOS2; copper ion binding / phosphopyruvate hydratase	K.AVGNVNNIIGPALIGK.D	2	1548.91	31.51	3.80914	1	1	0.94	1	6863665	8334201	0.82	0	14N
AT2G36530.1	LOS2; copper ion binding / phosphopyruvate hydratase	K.ISGDALKDLYK.S	2	1221.67	38.88	2.3738	1	1	0.94	1	1814639	2763400	0.66	0	14N
AT2G36530.1	LOS2; copper ion binding / phosphopyruvate hydratase	K.KAGWGVMTSHR.S	3	1228.63	41.02	4.15099	2	2	0.94	1	2668155	3228773	0.83	0	14N
AT2G36530.1	LOS2; copper ion binding / phosphopyruvate hydratase	K.SFVAEYPIVSIEDPFDQDDWEHYAK.M	3	2999.37	46.84	4.63433	4	4	0.9	1	60107964	85770583	0.7	0	14N
AT2G36530.1	LOS2; copper ion binding / phosphopyruvate hydratase	K.VNQIGSVTESIEAVK.M	2	1572.85	81.72	4.64127	2	2	0.91	1	26430034	37277570	0.71	0	14N
AT2G36530.1	LOS2; copper ion binding / phosphopyruvate hydratase	K.DPTQQTAIDNFMVHELDGTQNEWGWCK.Q	3	3219.43	36.39	5.56002	2	2	0.92	1	6771681	7345731	0.92	0	14N
AT2G36530.1	LOS2; copper ion binding / phosphopyruvate hydratase	K.KYGQDATNVGDEGGFAPNIQENK.E	3	2451.15	24.39	3.54937	1	1	0.94	1	1215410	835673	1.45	0	15N
AT2G36530.1	LOS2; copper ion binding / phosphopyruvate hydratase	K.AGAVVSGIPLYK.H	2	1173.69	45.25	3.23767	2	2	0.98	1	29364899	24132598	1.22	0	15N
AT2G36530.1	LOS2; copper ion binding / phosphopyruvate hydratase	K.MGVEVYHHLK.S	3	1211.63	30	6.02499	1	1	0.94	1	13279961	12538474	1.06	0	15N
AT2G36530.1	LOS2; copper ion binding / phosphopyruvate hydratase	K.AGWGVMTSHR.S	3	1100.53	42.91	6.54232	2	2	0.92	1	1040824	603935	1.785	0.0919239	15N
AT2G36530.1	LOS2; copper ion binding / phosphopyruvate hydratase	K.YGQDATNVGDEGGFAPNIQENK.E	2	2323.05	97.49	3.44376	2	2	0.99	1	3291962	2183822	1.365	0.205061	15N
AT2G36530.1	LOS2; copper ion binding / phosphopyruvate hydratase	K.AVGNVNNIIGPALIGK.D	2	1548.91	38.13	3.55089	2	2	0.98	1	28131296	21364770	1.32	0	15N
AT2G36530.1	LOS2; copper ion binding / phosphopyruvate hydratase	K.ISGDALKDLYK.S	2	1221.67	46.09	4.01091	1	1	0.93	1	1526981	1962151	0.78	0	15N
AT2G36530.1	LOS2; copper ion binding / phosphopyruvate hydratase	K.VNQIGSVTESIEAVK.M	2	1572.85	91.15	3.87833	3	3	0.93	1	36420741	29876141	1.22	0	15N
AT2G36530.1	LOS2; copper ion binding / phosphopyruvate hydratase	K.YGQDATNVGDEGGFAPNIQENKEGLELLK.T	3	3105.51	45.69	2.93029	2	2	0.91	1	11330593	9711769	1.17	0	15N
AT2G36530.1	LOS2; copper ion binding / phosphopyruvate hydratase	K.LAMQEFMILPVGAASFK.E	2	1851.98	72.67	4.91369	7	7	0.97	1	57285087	53148239	1.06714	0.0125357	15N
AT2G36530.1	LOS2; copper ion binding / phosphopyruvate hydratase	K.VTAAVPSGASTGIYEALELR.D	2	2004.07	107.72	5.13957	4	4	0.93	1	29361682	23620212	1.1175	0.245	15N
AT2G36530.1	LOS2; copper ion binding / phosphopyruvate hydratase	K.KAGWGVMTSHR.S	3	1228.63	42.68	5.77884	1	1	0.99	1	2544454	1829456	1.39	0	15N
AT2G36530.1	LOS2; copper ion binding / phosphopyruvate hydratase	K.SFVAEYPIVSIEDPFDQDDWEHYAK.M	3	2999.38	41.93	6.23467	4	4	0.94	1	79011677	67861147	1.16	0	15N
AT2G36530.1	LOS2; copper ion binding / phosphopyruvate hydratase	K.SFVAEYPIVSIEDPFDQ*DDWEHYAK.M	3	3000.38	43.22	11.332	1	1	0.9	1	67144367	68626047	0.98	0	15N
AT2G36530.1	LOS2; copper ion binding / phosphopyruvate hydratase	K.DPTQQTAIDNFMVHELDGTQNEWGWCK.Q	3	3219.42	56.12	2.2675	3	3	0.9	1	23676449	19019844	1.24	0	15N
AT2G36580.1	pyruvate kinase, putative	R.AEATDVANAVLDGSDAILLGAETLR.G	2	2485.31	44.31	12.6175	3	3	0.94	3	8227502	12172884	0.653333	0.046188	14N
AT2G36580.1	pyruvate kinase, putative	K.IEN*EEGLTHFDEILQEADGIILSR.G	3	2741.39	23.43	14.0807	1	1	0.81	1	3926756	5879112	0.67	0	14N
AT2G36580.1	pyruvate kinase, putative	R.VVDSMTDNLRPTR.A	3	1502.76	28.92	3.06104	1	1	0.82	3	3324292	4502436	0.74	0	14N
AT2G36580.1	pyruvate kinase, putative	R.ELLNSCGDLSQTQIFAK.I	2	1923.95	29.92	0.699655	1	1	0.91	1	2806416	3515611	0.8	0	14N
AT2G36580.1	pyruvate kinase, putative	R.GLFPMLADPR.H	2	1115.59	29.07	5.10941	1	1	0.95	3	2997268	1871987	1.6	0	15N
AT2G36580.1	pyruvate kinase, putative	K.CNMAGKPAVLTR.V	3	1316.69	51.36	7.89867	1	1	0.94	3	777904	451115	1.72	0	15N
AT2G36580.1	pyruvate kinase, putative	R.AEATDVANAVLDGSDAILLGAETLR.G	2	2484.28	60.58	0.724556	3	3	0.9	3	1835554	1895622	1.16333	0.167432	15N
AT2G36580.1	pyruvate kinase, putative	R.VVDSMTDNLRPTR.A	3	1502.77	20.13	4.19229	1	1	1	3	4709752	3407681	1.38	0	15N
AT2G36580.1	pyruvate kinase, putative	R.HPAESTSATNESVLK.V	2	1569.78	36.76	2.67555	1	1	0.95	3	601213	357558	1.68	0	15N
[truncated: 2,720 more rows]

## Sheet: Trial 2
Locus	Name	Sequence	Charge	ObsMass	Score	error(ppm)	numID	numQuant	bestCorr	numOccurInProteome	14N Peak Area	15N Peak Area	aveRatio(linear) (N14/N15 areas)	sdRatio(linear)	WT Label
AT1G01050.1	AtPPa1 (Arabidopsis thaliana pyrophosphorylase 1); inorganic diphosphatase	R.ILYSSVVYPHNYGFVPR.T	2	2010.06	34.38	8.95503	1	1	0.91	2	1016825	1357346	0.75	0	14N
AT1G01050.1	AtPPa1 (Arabidopsis thaliana pyrophosphorylase 1); inorganic diphosphatase	R.ILYSSVVYPHNYGFVPR.T	2	2010.05	43.46	4.92526	2	2	0.95	2	1400961	1578347	0.97	0.113137	15N
AT1G01050.1	AtPPa1 (Arabidopsis thaliana pyrophosphorylase 1); inorganic diphosphatase	R.TLCEDNDPIDVLVIMQEPVLPGCFLR.A	3	3042.52	25.65	8.38128	1	1	0.89	2	2355552	2562685	0.92	0	14N
AT1G01050.1	AtPPa1 (Arabidopsis thaliana pyrophosphorylase 1); inorganic diphosphatase	R.TLCEDNDPIDVLVIMQEPVLPGCFLR.A	3	3042.53	23.56	12.9499	1	1	0.93	2	3284876	2999230	1.1	0	15N
AT1G01090.1	PDH-E1 ALPHA (PYRUVATE DEHYDROGENASE E1 ALPHA); pyruvate dehydrogenase (acetyl-transferring)	R.FRGHSLADPDELRDAAEK.A	4	2026.01	33.03	5.33072	1	1	0.96	1	1863040	1620299	1.15	0	14N
AT1G01090.1	PDH-E1 ALPHA (PYRUVATE DEHYDROGENASE E1 ALPHA); pyruvate dehydrogenase (acetyl-transferring)	R.FRGHSLADPDELRDAAEK.A	4	2026	21.79	4.88649	1	1	0.89	1	1848492	2407959	0.77	0	15N
AT1G01100.1	60S acidic ribosomal protein P1 (RPP1A)	K.AAGVSIESYWPMLFAK.M	2	1770.91	31.42	7.28749	1	1	0.93	2	5986350	5880190	1.02	0	14N
AT1G01100.1	60S acidic ribosomal protein P1 (RPP1A)	K.AAGVSIESYWPMLFAK.M	2	1768.92	38.95	13.9635	2	2	0.96	2	5851346	6714580	0.87	0	15N
AT1G01100.1	60S acidic ribosomal protein P1 (RPP1A)	R.NVTDLIMNVGAGGGGGAPVAAAAPAAGGGAAAAPAAEEK.K	3	3302.66	41.12	2.6488	1	1	0.96	1	4872863	4155193	1.17	0	14N
AT1G01100.1	60S acidic ribosomal protein P1 (RPP1A)	R.NVTDLIMNVGAGGGGGAPVAAAAPAAGGGAAAAPAAEEK.K	3	3301.67	49.19	7.29939	1	1	0.88	1	5325439	5615058	0.95	0	15N
AT1G01470.1	LEA14 (LATE EMBRYOGENESIS ABUNDANT 14)	K.DMTALDIPVVVPYSILFNLAR.D	3	2347.3	25.52	8.24516	1	1	0.46	1	827371	1187661	0.7	0	14N
AT1G01620.1	PIP1C (PLASMA MEMBRANE INTRINSIC PROTEIN 1C); water channel	R.DSHVPILAPLPIGFAVFLVHLATIPITGTGIN*PAR.S	3	3619.1	21.81	14.1086	1	1	0.83	8	3610896	3404954	1.06	0	14N
AT1G01620.1	PIP1C (PLASMA MEMBRANE INTRINSIC PROTEIN 1C); water channel	R.VGANKFPER.Q	3	1016.56	23.23	7.27954	1	1	0.96	8	329339	139357	2.36	0	15N
AT1G02130.1	ARA-5 (ARABIDOPSIS RAS 5); GTP binding	K.LQIWDTAGQER.F	2	1315.66	43.71	3.80037	1	1	0.95	20	4099690	2890636	1.42	0	14N
AT1G02130.1	ARA-5 (ARABIDOPSIS RAS 5); GTP binding	K.LQIWDTAGQER.F	2	1315.67	64.93	5.01649	1	1	0.92	20	4713295	3624384	1.3	0	15N
AT1G02500.1	SAM1 (S-ADENOSYLMETHIONINE SYNTHETASE 1); methionine adenosyltransferase	K.TQVTVEYYNDKGAMVPIR.V	2	2083.06	97	6.33687	1	1	0.91	1	1612920	1499476	1.08	0	15N
AT1G02500.1	SAM1 (S-ADENOSYLMETHIONINE SYNTHETASE 1); methionine adenosyltransferase	K.VLVNIEQQSPDIAQGVHGHFTK.C	2	2416.28	61.21	7.44954	2	2	0.98	2	11261632	9444641	1.11	0.113137	14N
AT1G02500.1	SAM1 (S-ADENOSYLMETHIONINE SYNTHETASE 1); methionine adenosyltransferase	K.VLVNIEQQSPDIAQGVHGHFTK.C	2	2416.27	97.41	3.51784	3	3	0.97	2	2104109	1762853	1.14667	0.111505	15N
AT1G02500.1	SAM1 (S-ADENOSYLMETHIONINE SYNTHETASE 1); methionine adenosyltransferase	R.FVIGGPHGDAGLTGR.K	2	1452.76	68.42	5.78212	1	1	0.98	4	36078723	32738843	1.1	0	14N
AT1G02500.1	SAM1 (S-ADENOSYLMETHIONINE SYNTHETASE 1); methionine adenosyltransferase	R.FVIGGPHGDAGLTGR.K	2	1452.76	82.65	4.61193	2	2	0.99	4	113452088	116091879	1.03	0.0707107	15N
AT1G02500.1	SAM1 (S-ADENOSYLMETHIONINE SYNTHETASE 1); methionine adenosyltransferase	R.VHTVLISTQHDETVTNDEIAR.D	3	2377.21	49.23	6.94095	1	1	0.89	2	4770082	4583875	1.04	0	14N
AT1G02500.1	SAM1 (S-ADENOSYLMETHIONINE SYNTHETASE 1); methionine adenosyltransferase	R.VHTVLISTQHDETVTNDEIAR.D	3	2377.21	42.6	7.78228	1	1	0.92	2	7221492	6011962	1.2	0	15N
AT1G02780.1	emb2386 (embryo defective 2386); structural constituent of ribosome	K.GKVWLDPNESSDISMANSR.Q	2	2105	47.44	4.03802	1	1	0.98	1	1821709	1557009	1.17	0	14N
AT1G02780.1	emb2386 (embryo defective 2386); structural constituent of ribosome	K.GKVWLDPNESSDISMANSR.Q	2	2105	69.42	3.37293	2	2	0.97	1	2050192	1843824	1.05	0.0848528	15N
AT1G02780.1	emb2386 (embryo defective 2386); structural constituent of ribosome	K.GPGGDVAPVAAPAPAATPAPTAAVPK.K	2	2250.23	49.73	7.33265	2	2	0.99	1	5207172	16634576	0.79	0.678823	14N
AT1G02780.1	emb2386 (embryo defective 2386); structural constituent of ribosome	K.GPGGDVAPVAAPAPAATPAPTAAVPK.K	2	2250.22	60.3	2.79974	3	3	0.99	1	8169021	15870496	0.776667	0.23094	15N
AT1G02780.1	emb2386 (embryo defective 2386); structural constituent of ribosome	K.VWLDPNESSDISMANSR.Q	2	1919.88	44.58	3.02103	1	1	0.97	1	4013956	3633658	1.1	0	14N
AT1G02780.1	emb2386 (embryo defective 2386); structural constituent of ribosome	K.VWLDPNESSDISMANSR.Q	2	1919.88	71.63	0.937561	1	1	0.91	1	5060919	4579005	1.11	0	15N
AT1G02920.1	GSTF7; copper ion binding / glutathione binding / glutathione transferase	K.LFDERPHVSAWVADITSRPSAK.K	4	2481.3	21.71	6.16616	1	1	0.93	1	1623871	1853011	0.88	0	14N
AT1G02920.1	GSTF7; copper ion binding / glutathione binding / glutathione transferase	R.RVLIALHEK.N	3	1077.68	44.39	7.98015	1	1	0.86	4	1264307	1200436	1.05	0	14N
AT1G02920.1	GSTF7; copper ion binding / glutathione binding / glutathione transferase	R.VLIALHEK.N	3	921.579	30.44	6.94465	1	1	0.97	4	917353	917925	1	0	14N
AT1G02920.1	GSTF7; copper ion binding / glutathione binding / glutathione transferase	R.VLIALHEK.N	3	921.578	25.22	5.96806	1	1	0.94	4	1565103	1017645	1.54	0	15N
AT1G02930.1	ATGSTF6 (GLUTATHIONE S-TRANSFERASE); copper ion binding / glutathione binding / glutathione transferase	K.VPAFEDGDFKIFESR.A	3	1756.88	28.07	10.2773	1	1	0.8	1	1478193	1600273	0.92	0	14N
AT1G03220.1	extracellular dermal glycoprotein, putative / EDGP, putative	K.DQSTLQYTTVINQR.T	2	1665.85	66.24	5.34265	1	1	0.97	1	10362445	7208129	1.44	0	14N
AT1G03220.1	extracellular dermal glycoprotein, putative / EDGP, putative	K.FGFSSTLLGR.Q	2	1083.59	52.95	7.29065	1	1	0.92	2	10081876	6808458	1.48	0	14N
AT1G03220.1	extracellular dermal glycoprotein, putative / EDGP, putative	K.FGFSSTLLGR.Q	2	1083.58	42.37	4.1529	1	1	0.9	2	7554662	6574011	1.15	0	15N
AT1G03220.1	extracellular dermal glycoprotein, putative / EDGP, putative	K.GVAFFGNGPYVFLPGIQISSLQ*TTPLLINPVSTASAFSQGEK.S	4	4353.32	27.87	11.7153	1	1	0.84	1	2990833	4078204	0.73	0	15N
AT1G03220.1	extracellular dermal glycoprotein, putative / EDGP, putative	K.GVAFFGNGPYVFLPGIQISSLQTTPLLIN*PVSTASAFSQGEK.S	3	4353.32	46.52	13.2774	1	1	0.81	1	1840809	2227364	0.83	0	14N
AT1G03220.1	extracellular dermal glycoprotein, putative / EDGP, putative	K.IPNLIFDCGATFLLK.G	2	1720.94	30.47	7.72838	1	1	0.65	1	3541959	4533008	0.78	0	14N
AT1G03220.1	extracellular dermal glycoprotein, putative / EDGP, putative	K.ISSVNPYTVLESSIYNAFTSEFVK.Q	2	2694.38	73.88	9.87251	4	4	0.85	1	5902948	4866345	1.195	0.0173205	14N
AT1G03220.1	extracellular dermal glycoprotein, putative / EDGP, putative	K.ISSVNPYTVLESSIYNAFTSEFVK.Q	3	2694.38	41.28	9.27867	1	1	0.85	1	15076472	15877043	0.95	0	15N
AT1G03220.1	extracellular dermal glycoprotein, putative / EDGP, putative	R.ELWVDCDKGYVSSTYQSPR.C	3	2289.06	29.35	6.68401	1	1	0.8	1	4563451	3839364	1.19	0	14N
AT1G03220.1	extracellular dermal glycoprotein, putative / EDGP, putative	R.HNIGLPSQFAAAFSFHR.K	3	1898.98	54.68	9.53152	1	1	0.85	1	1834046	2028092	0.9	0	14N
AT1G03220.1	extracellular dermal glycoprotein, putative / EDGP, putative	R.HNIGLPSQFAAAFSFHR.K	3	1898.97	50.2	3.68622	1	1	0.88	1	1595938	1588606	1	0	15N
AT1G03220.1	extracellular dermal glycoprotein, putative / EDGP, putative	R.LGYAVPEIELVLHSK.D	3	1666.95	21.69	8.51862	1	1	0.92	1	2037467	2022535	1.01	0	14N
AT1G03220.1	extracellular dermal glycoprotein, putative / EDGP, putative	R.TPLVPASVVFDLGGR.E	2	1526.87	63.73	8.84171	4	4	0.93	2	27805186	28058790	0.9475	0.085	14N
AT1G03220.1	extracellular dermal glycoprotein, putative / EDGP, putative	R.TPLVPASVVFDLGGR.E	2	1526.87	59.34	8.84171	3	3	0.93	2	19341353	23566031	0.82	0	15N
AT1G03220.1	extracellular dermal glycoprotein, putative / EDGP, putative	R.VASVKPFGACFSTK.N	2	1497.78	34.33	3.40506	1	1	0.92	2	5779104	5451590	1.06	0	14N
AT1G03220.1	extracellular dermal glycoprotein, putative / EDGP, putative	R.VASVKPFGACFSTK.N	3	1497.78	40.78	4.8739	2	2	0.97	2	4592675	5602959	0.86	0.0565685	15N
AT1G03230.1	extracellular dermal glycoprotein, putative / EDGP, putative	K.IPNLIFSCGSTSLLK.G	2	1648.91	41.55	12.3719	1	1	0.75	1	1528866	2389229	0.64	0	14N
AT1G03230.1	extracellular dermal glycoprotein, putative / EDGP, putative	K.IPNLIFSCGSTSLLK.G	2	1648.9	39.32	6.73179	1	1	0.71	1	1075720	1850925	0.58	0	15N
AT1G03230.1	extracellular dermal glycoprotein, putative / EDGP, putative	K.ISSVNPYTVLESSIYK.A	2	1798.97	51.45	12.3406	1	1	0.9	1	2287223	3156660	0.72	0	14N
AT1G03230.1	extracellular dermal glycoprotein, putative / EDGP, putative	K.ISSVNPYTVLESSIYK.A	2	1798.97	41.51	12.5073	1	1	0.89	1	2201636	2762865	0.8	0	15N
AT1G03230.1	extracellular dermal glycoprotein, putative / EDGP, putative	K.TPLLINPGTTVFEFSK.G	2	1762.98	49.93	9.81305	1	1	0.9	1	1859792	2899225	0.64	0	14N
AT1G03230.1	extracellular dermal glycoprotein, putative / EDGP, putative	K.TPLLINPGTTVFEFSK.G	2	1762.97	25.29	4.4811	1	1	0.91	1	1962129	2844576	0.69	0	15N
AT1G03860.2	ATPHB2 (PROHIBITIN 2)	R.ARPYLVESTTGSHDLQMVK.I	3	2131.09	50.62	2.06468	1	1	0.86	2	1771536	1943511	0.91	0	14N
AT1G03860.2	ATPHB2 (PROHIBITIN 2)	R.ARPYLVESTTGSHDLQMVK.I	3	2131.08	52.75	1.45466	1	1	0.91	2	2000590	2200274	0.91	0	15N
AT1G03870.1	FLA9 (FASCICLIN-LIKE ARABINOOGALACTAN 9)	K.YYSMDDLLSVSNPVR.T	2	1757.85	44.52	8.19188	1	1	0.91	1	1493682	1491683	1	0	14N
AT1G03870.1	FLA9 (FASCICLIN-LIKE ARABINOOGALACTAN 9)	R.QQRPLAVYVVDMVLLPGEMFGEHK.L	4	2755.43	31.08	2.90336	1	1	0.79	1	2206356	1654168	1.33	0	14N
AT1G04170.1	EIF2 GAMMA; translation factor, nucleic acid binding / translation initiation factor	K.KLDVTVLHPLSPEVISR.Q	3	1902.11	24.21	5.52021	1	1	0.87	1	1128489	1411710	0.8	0	15N
AT1G04170.1	EIF2 GAMMA; translation factor, nucleic acid binding / translation initiation factor	R.SFDVNKPGYEVDEIKGGVAGGSILR.G	3	2606.35	21.03	2.18697	1	1	0.88	1	1577841	1830570	0.86	0	15N
AT1G04270.1	RPS15 (CYTOSOLIC RIBOSOMAL PROTEIN S15); structural constituent of ribosome	R.NMIIVPEMIGSIIGVYN*GK.T	2	2048.1	40.95	13.6225	3	3	0.86	5	2970825	9873251	0.54	0.302655	14N
AT1G04270.1	RPS15 (CYTOSOLIC RIBOSOMAL PROTEIN S15); structural constituent of ribosome	R.NMIIVPEMIGSIIGVYN*GK.T	2	2048.09	46	7.81221	3	3	0.75	5	12595008	7218300	1.43333	0.531162	15N
AT1G04270.1	RPS15 (CYTOSOLIC RIBOSOMAL PROTEIN S15); structural constituent of ribosome	R.NMIIVPEMIGSIIGVYNGK.T	3	2047.12	28.13	13.8245	1	1	0.35	5	1344404	1583475	0.85	0	14N
AT1G04270.1	RPS15 (CYTOSOLIC RIBOSOMAL PROTEIN S15); structural constituent of ribosome	R.NMIIVPEMIGSIIGVYNGK.T	3	2047.1	22.06	5.32463	1	1	0.34	5	1478647	1806435	0.82	0	15N
AT1G04410.1	malate dehydrogenase, cytosolic, putative	K.EFAPSIPEK.N	2	1016.53	21.56	4.52522	1	1	0.99	2	21352276	19012236	1.12	0	14N
AT1G04410.1	malate dehydrogenase, cytosolic, putative	K.EFAPSIPEK.N	2	1016.53	21.93	5.21384	1	1	0.98	2	10713581	7636897	1.4	0	15N
AT1G04410.1	malate dehydrogenase, cytosolic, putative	K.EFAPSIPEKNISCLTR.L	2	1860.96	41.37	6.98569	2	2	0.91	1	4853220	5453187	0.8	0.127279	14N
AT1G04410.1	malate dehydrogenase, cytosolic, putative	K.MDLTAEELKEEKDLAYSCLS.-	2	2344.11	59.57	6.78302	1	1	0.84	2	3018757	2393142	1.26	0	14N
AT1G04410.1	malate dehydrogenase, cytosolic, putative	K.MDLTAEELKEEKDLAYSCLS.-	2	2344.1	47.03	4.47935	1	1	0.83	2	3051390	2306845	1.32	0	15N
AT1G04410.1	malate dehydrogenase, cytosolic, putative	K.MELIDAAFPLLK.G	2	1359.77	73.34	10.6637	4	4	0.95	1	47210735	45714960	1.03	0	14N
AT1G04410.1	malate dehydrogenase, cytosolic, putative	K.MELIDAAFPLLK.G	2	1359.77	72.97	7.42781	2	2	0.95	1	35555745	30564442	1.16	0	15N
AT1G04410.1	malate dehydrogenase, cytosolic, putative	K.NVIIWGNHSSSQYPDVNHAK.V	2	2265.11	75.25	3.84089	4	4	0.99	1	107130216	98718729	1.12	0.06	14N
AT1G04410.1	malate dehydrogenase, cytosolic, putative	K.NVIIWGNHSSSQYPDVNHAK.V	2	2265.11	81.81	2.11911	2	2	0.99	1	7396185	5710098	1.235	0.0919239	15N
AT1G04410.1	malate dehydrogenase, cytosolic, putative	K.VLVVANPANTNALILK.E	2	1649.01	68.16	7.88359	4	4	0.96	3	81501177	85382697	0.96	0.02	14N
AT1G04410.1	malate dehydrogenase, cytosolic, putative	K.VLVVANPANTNALILK.E	2	1649	69.21	4.42694	3	3	0.98	3	70096194	67544998	1.05667	0.0288675	15N
AT1G04410.1	malate dehydrogenase, cytosolic, putative	R.ELVKDDAWLDGEFISTVQQR.G	2	2348.2	47.38	12.3926	1	1	0.55	1	3000021	3222728	0.93	0	14N
AT1G04410.1	malate dehydrogenase, cytosolic, putative	R.GIMLGADQ*PVILHMLDIPPAAEALN*GVK.M	3	2885.57	48.46	16.3096	1	1	0.57	1	27381466	29364808	0.93	0	15N
AT1G04410.1	malate dehydrogenase, cytosolic, putative	R.GIMLGADQPVILHMLDIPPAAEALN*GVK.M	3	2883.55	50.33	8.01101	7	7	0.88	1	10373411	9368921	1.07714	0.0309377	14N
AT1G04410.1	malate dehydrogenase, cytosolic, putative	R.GIMLGADQPVILHMLDIPPAAEALN*GVK.M	3	2883.56	54.57	9.74499	5	5	0.94	1	9230128	8121052	1.102	0.0476445	15N
AT1G04410.1	malate dehydrogenase, cytosolic, putative	R.KLSSALSAASSACDHIR.D	2	1772.9	80.94	2.2562	2	2	0.95	2	2187533	1821233	1.255	0.0777817	14N
AT1G04410.1	malate dehydrogenase, cytosolic, putative	R.KLSSALSAASSACDHIR.D	3	1772.9	77.8	4.23038	1	1	0.92	2	27742374	23047220	1.2	0	15N
AT1G04410.1	malate dehydrogenase, cytosolic, putative	R.N*GDWSIVQGLPIDEVSR.K	2	1884.95	73.8	8.9128	2	2	0.88	1	9266002	7860769	1.18	0	14N
AT1G04410.1	malate dehydrogenase, cytosolic, putative	R.N*GDWSIVQGLPIDEVSR.K	2	1884.94	43.34	7.37428	1	1	0.91	1	8869100	7239894	1.23	0	15N
AT1G04410.1	malate dehydrogenase, cytosolic, putative	R.NGDWSIVQGLPIDEVSR.K	2	1883.96	65.89	9.81982	1	1	0.93	1	3500796	3257693	1.07	0	14N
AT1G04410.1	malate dehydrogenase, cytosolic, putative	R.NGDWSIVQGLPIDEVSR.K	2	1883.96	60.11	5.52033	1	1	0.94	1	3046086	2772479	1.1	0	15N
AT1G04410.1	malate dehydrogenase, cytosolic, putative	R.VLVTGAAGQIGYALVPMIAR.G	2	1999.15	75.02	6.90298	5	5	0.97	2	13337414	12687399	1.086	0.049295	14N
AT1G04410.1	malate dehydrogenase, cytosolic, putative	R.VLVTGAAGQIGYALVPMIAR.G	2	1999.15	73.65	6.10263	3	3	0.91	2	7936873	7616260	1.09	0.0866025	15N
AT1G04480.1	60S ribosomal protein L23 (RPL23A)	R.MSLGLPVAATVNCADNTGAK.N	2	1988.99	47.63	5.68132	1	1	0.87	1	5185572	4587334	1.13	0	14N
AT1G04480.1	60S ribosomal protein L23 (RPL23A)	R.MSLGLPVAATVNCADNTGAK.N	2	1988.98	76.81	2.36303	1	1	0.94	1	4715213	4733968	1	0	15N
AT1G04750.1	VAMP721 (VESICLE-ASSOCIATED MEMBRANE PROTEIN 721)	K.LKEHMQYCMDHPDEISK.L	4	2159.96	24.38	4.76863	1	1	0.99	4	4902418	4451239	1.1	0	15N
AT1G04820.1	TUA4; structural constituent of cytoskeleton	K.AFHEQLSVAEITNSAFEPASMMAK.C	2	2608.26	39.56	7.93639	3	3	0.88	3	4709242	4607150	0.996667	0.0404145	14N
AT1G04820.1	TUA4; structural constituent of cytoskeleton	K.AFHEQLSVAEITNSAFEPASMMAK.C	3	2608.25	38.47	5.36761	2	2	0.68	3	4819376	5033747	0.96	0	15N
AT1G04820.1	TUA4; structural constituent of cytoskeleton	K.CGINYQPPTVVPGGDLAK.V	2	1884.95	36	-1.48545	1	1	0.65	4	4367558	14386449	0.3	0	15N
AT1G04820.1	TUA4; structural constituent of cytoskeleton	K.EIVDLCLDR.I	2	1131.58	30.38	7.33496	1	1	0.74	4	3204122	3139504	1.02	0	14N
AT1G04820.1	TUA4; structural constituent of cytoskeleton	K.TVGGGDDAFNTFFSETGAGK.H	2	1976.9	79.46	7.63829	1	1	0.96	3	3051587	2836696	1.08	0	14N
AT1G04820.1	TUA4; structural constituent of cytoskeleton	K.TVGGGDDAFNTFFSETGAGK.H	2	1976.9	110.91	6.87952	1	1	0.88	3	4342687	4108596	1.06	0	15N
AT1G04820.1	TUA4; structural constituent of cytoskeleton	R.AVFVDLEPTVIDEVR.T	2	1700.92	69.97	7.40782	4	4	0.94	4	25371849	25887067	1.0275	0.095	14N
AT1G04820.1	TUA4; structural constituent of cytoskeleton	R.AVFVDLEPTVIDEVR.T	2	1700.92	59.83	5.58526	3	3	0.89	4	25961243	27582171	1.02667	0.150111	15N
AT1G04820.1	TUA4; structural constituent of cytoskeleton	R.FDGALNVDVTEFQTNLVPYPR.I	2	2394.21	38.58	5.84748	1	1	0.52	3	3226314	3832348	0.84	0	15N
AT1G04820.1	TUA4; structural constituent of cytoskeleton	R.IDHKFDLMYAK.R	3	1379.71	33.39	4.78365	1	1	0.98	3	10091143	8902776	1.13	0	14N
AT1G04820.1	TUA4; structural constituent of cytoskeleton	R.IDHKFDLMYAK.R	3	1379.7	43.92	2.17439	1	1	0.96	3	7854216	7647531	1.03	0	15N
AT1G04820.1	TUA4; structural constituent of cytoskeleton	R.IHFMLSSYAPVISAEK.A	2	1791.94	57.29	6.41766	1	1	0.87	3	3604596	3334912	1.08	0	14N
AT1G04820.1	TUA4; structural constituent of cytoskeleton	R.IHFMLSSYAPVISAEK.A	2	1791.95	46.09	10.045	2	2	0.97	3	5636209	5233867	1.03	0.0707107	15N
AT1G04820.1	TUA4; structural constituent of cytoskeleton	R.LVSQVISSLTASLR.F	2	1472.88	83.63	8.21529	1	1	0.52	3	2467658	2683309	0.92	0	14N
AT1G04820.1	TUA4; structural constituent of cytoskeleton	R.LVSQVISSLTASLR.F	2	1472.87	65.92	4.0058	1	1	0.7	3	2459325	2671801	0.92	0	15N
AT1G04820.1	TUA4; structural constituent of cytoskeleton	R.QLFHPEQLISGKEDAANNFAR.G	2	2384.21	60.08	4.94926	2	2	0.97	5	13565508	12439990	1.13	0.0565685	14N
AT1G04820.1	TUA4; structural constituent of cytoskeleton	R.QLFHPEQLISGKEDAANNFAR.G	3	2384.2	51.01	3.27154	2	2	0.97	5	13061596	12111707	1.085	0.00707107	15N
AT1G04820.1	TUA4; structural constituent of cytoskeleton	R.SLSIERPTYTNLNR.L	2	1662.87	25.13	-2.04465	1	1	0.98	1	3274616	3127745	1.05	0	14N
AT1G04820.1	TUA4; structural constituent of cytoskeleton	R.TIQFVDWCPTGFK.C	2	1597.78	29.9	4.69405	1	1	0.43	4	4503533	2372782	1.9	0	14N
AT1G05240.1	peroxidase, putative	K.LNDALLNLPSPFADIK.T	2	1739.97	35.31	6.95421	1	1	0.89	1	1052515	937265	1.12	0	15N
AT1G05240.1	peroxidase, putative	R.MHFHDCFVR.G	3	1247.55	29.35	4.88962	1	1	0.95	5	3482865	3517760	0.99	0	14N
AT1G05240.1	peroxidase, putative	R.MHFHDCFVR.G	3	1247.55	23.31	5.93167	1	1	0.95	5	2565800	1539577	1.67	0	15N
AT1G05260.1	RCI3 (RARE COLD INDUCIBLE GENE 3); peroxidase	K.IVQDFVSNHVSNAPSLAAALIR.M	3	2321.28	45.17	8.52986	1	1	0.83	1	4722130	6590811	0.72	0	14N
AT1G05260.1	RCI3 (RARE COLD INDUCIBLE GENE 3); peroxidase	K.IVQDFVSNHVSNAPSLAAALIR.M	3	2321.27	49.67	5.64349	1	1	0.93	1	3656637	5492470	0.67	0	15N
AT1G05260.1	RCI3 (RARE COLD INDUCIBLE GENE 3); peroxidase	R.GGQDPALDSEYAANLK.S	2	1647.79	76.33	7.40389	1	1	0.93	1	3122906	3064691	1.02	0	14N
AT1G05260.1	RCI3 (RARE COLD INDUCIBLE GENE 3); peroxidase	R.GGQDPALDSEYAANLK.S	2	1647.79	81.42	2.42751	1	1	0.81	1	4555883	4043226	1.13	0	15N
AT1G05260.1	RCI3 (RARE COLD INDUCIBLE GENE 3); peroxidase	R.GLFQSDSALTTNPTTLSNINR.I	2	2249.16	86.26	9.55922	1	1	0.97	1	1708348	1511478	1.13	0	14N
AT1G05260.1	RCI3 (RARE COLD INDUCIBLE GENE 3); peroxidase	R.GLFQSDSALTTNPTTLSNINR.I	2	2249.14	73.06	2.04523	1	1	0.93	1	2065778	2025861	1.02	0	15N
AT1G05260.1	RCI3 (RARE COLD INDUCIBLE GENE 3); peroxidase	R.ILTGSVGSFFSEFAK.S	2	1588.84	71.32	12.0215	1	1	0.97	1	2311536	1873470	1.23	0	14N
AT1G05260.1	RCI3 (RARE COLD INDUCIBLE GENE 3); peroxidase	R.ILTGSVGSFFSEFAK.S	2	1588.83	67.85	5.91633	1	1	0.87	1	2169713	2024615	1.07	0	15N
AT1G05620.1	URH2 (URIDINE-RIBOHYDROLASE 2); hydrolase	K.RFEEANEWSDKPTVK.V	3	1834.9	22.98	2.45246	1	1	0.83	2	3202240	2250313	1.42	0	15N
AT1G06030.1	pfkB-type carbohydrate kinase family protein	K.LGDDEFGHMLAGILR.K	3	1642.84	27	11.4437	1	1	0.85	2	1564647	1381167	1.13	0	14N
AT1G06030.1	pfkB-type carbohydrate kinase family protein	K.LGDDEFGHMLAGILR.K	3	1642.84	36.79	9.73934	1	1	0.78	2	1811983	1624750	1.12	0	15N
AT1G06030.1	pfkB-type carbohydrate kinase family protein	R.FANACGAITTTK.K	2	1253.62	65.04	4.86593	1	1	0.77	3	1071863	1237937	0.87	0	14N
AT1G06030.1	pfkB-type carbohydrate kinase family protein	R.TALAFVTLR.S	2	990.601	43.81	6.96552	1	1	0.94	5	2497254	2257306	1.11	0	14N
AT1G06030.1	pfkB-type carbohydrate kinase family protein	R.TALAFVTLR.S	2	990.598	53.87	3.63418	1	1	0.87	5	2099298	1998574	1.05	0	15N
AT1G07140.1	SIRANBP; Ran GTPase binding	K.SGMSVQEHVGNEK.S	2	1400.64	42.79	0.214187	1	1	0.9	1	100789	105872	0.95	0	15N
AT1G07660.1	histone H4	K.IFLENVIRDAVTYTEHAR.R	3	2146.15	32.48	12.0217	1	1	0.81	2	2451908	2288096	1.07	0	14N
AT1G07660.1	histone H4	K.TVTAMDVVYALKR.Q	2	1465.82	52.25	8.52774	1	1	0.61	2	1516469	2149197	0.71	0	14N
AT1G07660.1	histone H4	K.VLRDNIQGITKPAIR.R	4	1693.02	32.31	6.85171	2	2	0.98	1	3638385	2480805	1.32	0.212132	14N
AT1G07660.1	histone H4	K.VLRDNIQGITKPAIR.R	4	1693.02	37.76	5.43412	2	2	0.99	1	2719443	3186026	0.94	0.127279	15N
AT1G07660.1	histone H4	R.DNIQGITKPAIR.R	2	1324.76	54.18	7.77503	2	2	1	1	21884116	18717773	1.185	0.0212132	14N
AT1G07660.1	histone H4	R.DNIQGITKPAIR.R	2	1324.76	45.33	6.41629	3	3	1	1	16250268	16146858	0.946667	0.109697	15N
AT1G07660.1	histone H4	R.ISGLIYEETR.G	2	1179.63	51.74	4.83206	1	1	0.94	2	6570177	5581401	1.18	0	14N
AT1G07660.1	histone H4	R.ISGLIYEETR.G	2	1179.63	53.05	6.35797	1	1	0.97	2	6163994	6156415	1	0	15N
AT1G07670.1	calcium-transporting ATPase	R.VEQGSLTGESEAVSK.T	2	1519.75	62.67	3.29003	1	1	0.69	2	485234	500290	0.97	0	14N
AT1G07750.1	cupin family protein	K.SLSPEVLQAAFK.V	2	1288.72	23.73	5.35419	1	1	0.93	1	1905370	2394888	0.8	0	14N
AT1G07750.1	cupin family protein	R.AGFVLNCLEAPLDVDIKDGGR.V	3	2258.16	23.9	7.48402	1	1	0.53	1	1305240	1515674	0.86	0	15N
AT1G07770.1	RPS15A (ribosomal protein s15a); structural constituent of ribosome	R.ISVLNDALK.S	2	971.578	27.16	4.73459	1	1	0.95	1	3055652	2767050	1.1	0	14N
AT1G07790.1	HTB1; DNA binding	K.AMGIMNSFIN*DIFEK.L	2	1729.82	22.81	5.31849	1	1	0.46	9	1631286	1060029	1.54	0	14N
AT1G07790.1	HTB1; DNA binding	K.AMGIMNSFINDIFEK.L	2	1728.85	93.99	9.02345	4	4	0.98	9	19873347	16986046	1.17	0	14N
AT1G07790.1	HTB1; DNA binding	K.AMGIMNSFINDIFEK.L	2	1728.85	87.26	10.2381	4	4	0.96	9	20570976	22206252	0.9225	0.005	15N
AT1G07790.1	HTB1; DNA binding	K.QVHPDIGISSK.A	3	1179.64	28.89	6.86654	1	1	0.9	6	896502	1525579	0.59	0	14N
AT1G07790.1	HTB1; DNA binding	K.QVHPDIGISSK.A	3	1179.64	25.63	4.40815	1	1	0.94	6	1003624	1911153	0.53	0	15N
AT1G07890.3	APX1 (ascorbate peroxidase 1); L-ascorbate peroxidase	K.ALLDDPVFRPLVEK.Y	2	1610.92	46.36	4.46952	1	1	0.85	2	6306651	6906794	0.91	0	14N
AT1G07890.3	APX1 (ascorbate peroxidase 1); L-ascorbate peroxidase	K.ALLDDPVFRPLVEK.Y	2	1610.92	32.73	5.64898	1	1	0.96	2	9054157	8139139	1.11	0	15N
AT1G07890.3	APX1 (ascorbate peroxidase 1); L-ascorbate peroxidase	K.ELLSGEKEGLLQLVSDK.A	2	1857.03	89.5	9.36986	1	1	0.75	2	4794467	5409757	0.89	0	14N
AT1G07890.3	APX1 (ascorbate peroxidase 1); L-ascorbate peroxidase	K.ELLSGEKEGLLQLVSDK.A	2	1857.03	76.23	7.21587	2	2	0.97	2	8134425	7992832	1.04	0.0282843	15N
AT1G07890.3	APX1 (ascorbate peroxidase 1); L-ascorbate peroxidase	K.QMGLSDKDIVALSGAHTLGR.C	3	2068.09	59.09	6.47944	2	2	0.98	2	15152325	11722236	1.205	0.120208	14N
AT1G07890.3	APX1 (ascorbate peroxidase 1); L-ascorbate peroxidase	K.QMGLSDKDIVALSGAHTLGR.C	3	2068.09	46.89	4.88375	2	2	0.94	2	18629836	12641164	1.275	0.275772	15N
AT1G07890.3	APX1 (ascorbate peroxidase 1); L-ascorbate peroxidase	R.FDAEQAHGANSGIHIALR.L	3	1905.96	58.15	4.24984	2	2	0.89	2	18806013	20644698	0.92	0.0141421	14N
AT1G07890.3	APX1 (ascorbate peroxidase 1); L-ascorbate peroxidase	R.FDAEQAHGANSGIHIALR.L	3	1905.96	34.27	5.40412	1	1	0.82	2	22364881	17209037	1.3	0	15N
AT1G07890.3	APX1 (ascorbate peroxidase 1); L-ascorbate peroxidase	R.SGFEGAWTSNPLIFDNSYFK.E	2	2279.08	47.2	9.56534	1	1	0.94	2	4216364	3918259	1.08	0	14N
AT1G07890.3	APX1 (ascorbate peroxidase 1); L-ascorbate peroxidase	R.SGFEGAWTSNPLIFDNSYFK.E	2	2279.08	70.36	8.60003	3	3	0.91	2	6216841	5620437	1.11	0	15N
AT1G07920.1	elongation factor 1-alpha / EF-1-alpha	K.ARYDEIIK.E	3	1006.56	29.6	6.15964	1	1	0.87	3	595758	1299679	0.46	0	15N
AT1G07920.1	elongation factor 1-alpha / EF-1-alpha	K.ARYDEIIKEVSSYLK.K	2	1812.98	63.11	7.61182	3	3	0.9	3	1641888	2265734	0.91	0.165227	14N
AT1G07920.1	elongation factor 1-alpha / EF-1-alpha	K.ARYDEIIKEVSSYLK.K	2	1813.99	45	11.0015	3	3	0.88	3	9627497	10525222	0.84	0.121244	15N
AT1G07920.1	elongation factor 1-alpha / EF-1-alpha	K.GAANFTSQVIIMN*HPGQIGN*GYAPVLDCHTSHIAVK.F	3	3819.89	72.68	6.2703	1	1	0.66	2	6245676	6615803	0.94	0	15N
AT1G07920.1	elongation factor 1-alpha / EF-1-alpha	K.GAANFTSQVIIMNHPGQ*IGNGYAPVLDCHTSHIAVK.F	3	3817.9	24.15	6.67911	1	1	0.95	2	4089996	3819300	1.07	0	14N
AT1G07920.1	elongation factor 1-alpha / EF-1-alpha	K.GAANFTSQVIIMNHPGQIGNGYAPVLDCHTSHIAVK.F	5	3818.92	24.14	6.31163	1	1	0.83	2	4052332	3962424	1.02	0	15N
AT1G07920.1	elongation factor 1-alpha / EF-1-alpha	K.IGGIGTVPVGR.V	2	1024.62	64.56	5.1727	2	2	0.97	3	120720831	124745310	0.97	0	14N
AT1G07920.1	elongation factor 1-alpha / EF-1-alpha	K.IGGIGTVPVGR.V	2	1024.62	67.03	5.66069	1	1	0.98	3	103102058	108586983	0.95	0	15N
AT1G07920.1	elongation factor 1-alpha / EF-1-alpha	K.MTPTKPM#VVETFSEYPPLGR.F	3	2295.16	21.88	8.5398	1	1	0.69	2	8158472	9083616	0.9	0	15N
AT1G07920.1	elongation factor 1-alpha / EF-1-alpha	K.MTPTKPMVVETFSEYPPLGR.F	2	2279.16	59.02	9.25787	8	8	0.99	2	32464125	28045026	1.075	0.0908688	14N
AT1G07920.1	elongation factor 1-alpha / EF-1-alpha	K.MTPTKPMVVETFSEYPPLGR.F	2	2279.16	65.18	6.93244	7	7	0.99	2	42963005	43040716	0.961429	0.048107	15N
AT1G07920.1	elongation factor 1-alpha / EF-1-alpha	K.YYCTVIDAPGHR.D	2	1450.68	56.17	4.48068	1	1	0.98	3	8219363	5149459	1.6	0	14N
AT1G07920.1	elongation factor 1-alpha / EF-1-alpha	K.YYCTVIDAPGHR.D	2	1450.68	52.67	2.68841	1	1	0.86	3	10234799	7708221	1.33	0	15N
AT1G07920.1	elongation factor 1-alpha / EF-1-alpha	K.YYCTVIDAPGHRDFIK.N	2	1953.96	43.96	5.47609	1	1	0.81	3	2445458	2576282	0.95	0	14N
AT1G07920.1	elongation factor 1-alpha / EF-1-alpha	K.YYCTVIDAPGHRDFIK.N	2	1953.96	46.24	4.96431	1	1	0.95	3	1954511	2216075	0.88	0	15N
AT1G07920.1	elongation factor 1-alpha / EF-1-alpha	R.LPLQDVYK.I	2	974.557	29.38	5.23318	1	1	0.86	3	7540342	8050567	0.94	0	14N
AT1G07920.1	elongation factor 1-alpha / EF-1-alpha	R.LPLQDVYK.I	2	974.556	43	4.41229	1	1	0.95	3	5109581	6118129	0.84	0	15N
AT1G07920.1	elongation factor 1-alpha / EF-1-alpha	R.QTVAVGVIK.S	2	913.572	35.67	5.03521	1	1	0.96	2	3418934	2426169	1.41	0	14N
AT1G07920.1	elongation factor 1-alpha / EF-1-alpha	R.QTVAVGVIK.S	2	913.571	60.1	3.83113	1	1	0.98	2	5486924	4483683	1.22	0	15N
AT1G07920.1	elongation factor 1-alpha / EF-1-alpha	R.VETGMIKPGM#VVTFAPTGLTTEVK.S	3	2521.35	22.15	10.312	1	1	0.72	2	3968972	4513546	0.88	0	14N
AT1G07920.1	elongation factor 1-alpha / EF-1-alpha	R.VETGMIKPGM#VVTFAPTGLTTEVK.S	3	2521.35	21.29	10.1534	1	1	0.69	2	4425829	5831234	0.76	0	15N
AT1G07920.1	elongation factor 1-alpha / EF-1-alpha	R.VETGMIKPGMVVTFAPTGLTTEVK.S	2	2505.35	58.12	7.82332	11	11	0.92	2	246455728	258235358	1.03182	0.0940019	14N
AT1G07920.1	elongation factor 1-alpha / EF-1-alpha	R.VETGMIKPGMVVTFAPTGLTTEVK.S	2	2505.34	86.12	2.83396	10	10	0.91	2	39941417	41854202	0.915	0.0368932	15N
AT1G07920.1	elongation factor 1-alpha / EF-1-alpha	R.YDEIIKEVSSYLK.K	3	1585.85	28.18	11.1613	1	1	0.79	3	2864361	2389705	1.2	0	14N
AT1G07920.1	elongation factor 1-alpha / EF-1-alpha	R.YDEIIKEVSSYLK.K	3	1585.85	28.35	9.58488	1	1	0.89	3	3117171	3100303	1.01	0	15N
AT1G07920.1	elongation factor 1-alpha / EF-1-alpha	R.YDEIIKEVSSYLKK.V	3	1713.94	32.27	6.06794	2	2	0.94	3	6677931	5112422	0.975	0.473762	14N
AT1G07920.1	elongation factor 1-alpha / EF-1-alpha	R.YDEIIKEVSSYLKK.V	3	1713.94	42.64	5.71786	1	1	0.96	3	4768598	4446829	1.07	0	15N
AT1G08200.1	AXS2 (UDP-D-APIOSE/UDP-D-XYLOSE SYNTHASE 2); UDP-glucuronate decarboxylase	R.ANGHIFN*VGNPNNEVTVR.Q	3	1951.97	33.46	4.20091	1	1	0.95	2	1448245	1340452	1.08	0	14N
AT1G08200.1	AXS2 (UDP-D-APIOSE/UDP-D-XYLOSE SYNTHASE 2); UDP-glucuronate decarboxylase	R.ANGHIFN*VGNPNNEVTVR.Q	3	1951.97	28.95	6.76244	1	1	0.96	2	1541861	1540328	1	0	15N
AT1G08200.1	AXS2 (UDP-D-APIOSE/UDP-D-XYLOSE SYNTHASE 2); UDP-glucuronate decarboxylase	R.MDFIPGIDGPSEGVPR.V	2	1685.83	23.26	8.48254	1	1	0.94	2	3400644	3052568	1.11	0	14N
AT1G08200.1	AXS2 (UDP-D-APIOSE/UDP-D-XYLOSE SYNTHASE 2); UDP-glucuronate decarboxylase	R.MDFIPGIDGPSEGVPR.V	2	1685.83	23.74	10.8553	1	1	0.88	2	3578296	3831762	0.93	0	15N
AT1G08360.1	60S ribosomal protein L10A (RPL10aA)	K.ICMLGDAQHVEEAEK.M	2	1728.8	68.53	4.7432	1	1	0.89	3	2895732	3015612	0.96	0	15N
AT1G08830.1	CSD1 (COPPER/ZINC SUPEROXIDE DISMUTASE 1); superoxide dismutase	R.AVVVHADPDDLGKGGHELSLATGNAGGR.V	3	2712.38	35.37	4.90347	3	3	0.98	1	5674159	7335417	0.75	0.034641	14N
AT1G08880.1	H2AXA; DNA binding	R.VGAGAPVYLSAVLEYLAAEVLELAGNAAR.D	3	2886.59	33.22	11.5016	1	1	0.81	2	933037	1198252	0.78	0	14N
AT1G08880.1	H2AXA; DNA binding	R.VGAGAPVYLSAVLEYLAAEVLELAGNAAR.D	3	2886.6	68.75	15.347	3	3	0.79	2	939680	1166647	0.776667	0.057735	15N
AT1G09080.1	BIP3; ATP binding	R.VEIESLFDGVDFSEPLTR.A	2	2052.03	47.18	9.89272	2	2	0.8	2	4293308	2568050	1.67	0	14N
AT1G09080.1	BIP3; ATP binding	R.VEIESLFDGVDFSEPLTR.A	2	2052.03	36.09	7.65102	3	3	0.84	2	4523622	3467800	1.3	0	15N
AT1G09100.1	RPT5B (26S proteasome AAA-ATPase subunit RPT5B); ATPase/ calmodulin binding	K.AMEVDEKPTEDYNDIGGLEK.Q	3	2252.03	45.27	1.77618	1	1	0.86	2	1601355	1587587	1.01	0	15N
AT1G09100.1	RPT5B (26S proteasome AAA-ATPase subunit RPT5B); ATPase/ calmodulin binding	K.GVLLYGPPGTGK.T	2	1157.66	22.46	4.05994	2	2	0.79	11	3323065	3694480	0.9	0	14N
AT1G09100.1	RPT5B (26S proteasome AAA-ATPase subunit RPT5B); ATPase/ calmodulin binding	K.GVLLYGPPGTGK.T	2	1157.66	23.23	4.49185	1	1	0.95	11	2423744	3451528	0.7	0	15N
AT1G09180.1	ATSARA1A (ARABIDOPSIS THALIANA SECRETION-ASSOCIATED RAS SUPER FAMILY 1); GTP binding	K.TTLLHMLKDER.L	3	1355.74	23.32	5.67959	1	1	0.82	4	1312446	1268987	1.03	0	14N
AT1G09180.1	ATSARA1A (ARABIDOPSIS THALIANA SECRETION-ASSOCIATED RAS SUPER FAMILY 1); GTP binding	R.LVQHQPTQHPTSEELSIGK.I	4	2128.11	23.4	4.93398	1	1	0.99	4	16611736	16326181	1.02	0	14N
AT1G09180.1	ATSARA1A (ARABIDOPSIS THALIANA SECRETION-ASSOCIATED RAS SUPER FAMILY 1); GTP binding	R.LVQHQPTQHPTSEELSIGK.I	4	2128.11	28.21	3.43029	1	1	0.99	4	17736886	18672499	0.95	0	15N
AT1G09200.1	histone H3	R.EIAQDFKTDLR.F	2	1334.69	30.88	1.94802	1	1	0.94	5	6352450	4931803	1.29	0	14N
AT1G09200.1	histone H3	R.FQSSAVAALQ*EAAEAYLVGLFEDTNLCAIHAK.R	4	3437.74	24.34	13.9338	1	1	0.79	2	3520032	3758250	0.94	0	14N
AT1G09200.1	histone H3	R.FQSSAVAALQEAAEAYLVGLFEDTNLCAIHAK.R	3	3436.73	40.69	8.29283	3	3	0.89	2	4682150	4349976	1.07333	0.011547	14N
AT1G09200.1	histone H3	R.FQSSAVAALQEAAEAYLVGLFEDTNLCAIHAK.R	4	3436.73	41.93	6.22689	1	1	0.72	2	3531579	4087517	0.86	0	15N
AT1G09210.1	calreticulin 2 (CRT2)	K.FGGDTPYSIMFGPDICGYSTK.K	2	2312.03	54.64	4.974	1	1	0.9	3	1954784	2184631	0.89	0	14N
AT1G09210.1	calreticulin 2 (CRT2)	K.FGGDTPYSIMFGPDICGYSTK.K	2	2312.03	39.61	5.62279	1	1	0.96	3	2839639	3183482	0.89	0	15N
AT1G09210.1	calreticulin 2 (CRT2)	K.GKWEAPLIDNPDFKDDPELYVFPK.L	4	2832.43	44.23	8.96763	2	2	0.86	1	3671843	4245269	0.825	0.0494975	14N
AT1G09210.1	calreticulin 2 (CRT2)	K.GKWEAPLIDNPDFKDDPELYVFPK.L	4	2832.43	28.97	6.14318	1	1	0.88	1	3965120	4689740	0.85	0	15N
AT1G09210.1	calreticulin 2 (CRT2)	K.SVDSEETSEKDATAHDEL.-	2	1961.85	51.3	4.99531	1	1	0.98	1	1242953	257067	4.84	0	14N
AT1G09210.1	calreticulin 2 (CRT2)	K.YVGLELWQVK.S	2	1233.69	24.06	4.0529	1	1	0.81	1	1212237	1145459	1.06	0	15N
AT1G09210.1	calreticulin 2 (CRT2)	R.FYAISAEFPEFSNK.D	2	1648.79	58.26	5.21596	1	1	0.81	3	1800942	1094529	1.65	0	14N
AT1G09210.1	calreticulin 2 (CRT2)	R.FYAISAEFPEFSNK.D	2	1648.79	71.56	4.0636	1	1	0.92	3	1927781	1546616	1.25	0	15N
AT1G09560.1	GLP5 (GERMIN-LIKE PROTEIN 5); manganese ion binding / nutrient reservoir	K.N*N*GDVPASVIAAFNSQLPGTQSLGATLFGSTPPVPDNILAQAFQTSPGTVK.H	4	5098.62	30.08	8.29789	1	1	0.82	1	14211907	4198465	3.39	0	14N
AT1G09560.1	GLP5 (GERMIN-LIKE PROTEIN 5); manganese ion binding / nutrient reservoir	R.IDYAPGGLNPPHTHPR.A	4	1740.89	47.26	7.92704	2	2	0.97	4	75908589	10669060	7.11	0	14N
AT1G09590.1	60S ribosomal protein L21 (RPL21A)	K.GPKPGFMVEGMTLETVTPIPYDVVNDLK.G	3	3046.58	22.5	11.2258	1	1	0.7	2	2914692	3430467	0.85	0	14N
AT1G09590.1	60S ribosomal protein L21 (RPL21A)	K.GPKPGFMVEGMTLETVTPIPYDVVNDLK.G	3	3046.57	22.96	6.43351	1	1	0.78	2	4411115	5276701	0.84	0	15N
AT1G09590.1	60S ribosomal protein L21 (RPL21A)	R.KKGYIPLSTYLR.T	3	1437.85	23.64	6.32893	1	1	0.89	2	1613547	1690805	0.95	0	15N
AT1G09630.1	ATRAB11C (ARABIDOPSIS RAB GTPASE 11C); GTP binding	K.AQIWDTAGQER.Y	2	1273.62	53.32	2.11995	1	1	0.93	24	4753359	4406376	1.08	0	14N
AT1G09630.1	ATRAB11C (ARABIDOPSIS RAB GTPASE 11C); GTP binding	K.AQIWDTAGQER.Y	2	1273.62	60.13	2.19847	1	1	0.78	24	3694655	3790071	0.97	0	15N
AT1G09640.1	elongation factor 1B-gamma, putative / eEF-1B gamma, putative	K.KFTSEFPHVER.Y	3	1375.7	33.08	4.87026	1	1	0.88	1	1921640	1688620	1.14	0	14N
AT1G09640.1	elongation factor 1B-gamma, putative / eEF-1B gamma, putative	K.VDISDEAQKER.V	3	1288.64	23.39	5.66491	1	1	0.96	2	354044	288490	1.23	0	15N
AT1G09640.1	elongation factor 1B-gamma, putative / eEF-1B gamma, putative	K.VPVLETPEGSVFESNAIAR.Y	2	2014.06	31.2	7.94421	1	1	0.7	1	2447495	3169931	0.77	0	14N
AT1G09640.1	elongation factor 1B-gamma, putative / eEF-1B gamma, putative	K.VPVLETPEGSVFESNAIAR.Y	2	2014.06	65.05	6.35537	1	1	0.94	1	2997207	2933130	1.02	0	15N
AT1G09640.1	elongation factor 1B-gamma, putative / eEF-1B gamma, putative	R.MGFMPYSAPAEEGAISTLKR.A	3	2155.07	28.52	6.49636	1	1	0.82	1	1617314	1355051	1.19	0	14N
AT1G09640.1	elongation factor 1B-gamma, putative / eEF-1B gamma, putative	R.VSQMIEDAEPFEGEALLDAK.C	2	2191.05	88.87	2.92098	1	1	0.93	2	5833077	5254566	1.11	0	14N
AT1G09640.1	elongation factor 1B-gamma, putative / eEF-1B gamma, putative	R.VSQMIEDAEPFEGEALLDAK.C	2	2191.05	105.62	2.6015	4	4	0.89	2	7692703	6542189	1.16	0.04	15N
AT1G09640.1	elongation factor 1B-gamma, putative / eEF-1B gamma, putative	R.YFWTVVNQPNFTK.V	2	1642.83	36.45	7.36537	1	1	0.98	1	3624677	2254979	1.61	0	14N
AT1G09740.1	ethylene-responsive protein, putative	K.LSSSSSDSSFVVLHVQPSPSVAAGVSPGTIPFGGPSGLEVPAFTAAIEQ*HQK.R	4	5161.66	28.49	11.8568	1	1	0.79	1	5864638	3921490	1.5	0	15N
AT1G09780.1	2,3-biphosphoglycerate-independent phosphoglycerate mutase, putative / phosphoglyceromutase, putative	K.AHGTAVGLPSEDDMGNSEVGHNALGAGR.I	3	2718.26	43.74	5.33432	1	1	0.99	2	8151578	7521138	1.08	0	15N
AT1G09780.1	2,3-biphosphoglycerate-independent phosphoglycerate mutase, putative / phosphoglyceromutase, putative	K.ALEYEDFDKFDR.V	2	1546.71	35.29	3.94388	1	1	0.82	1	2332552	2163294	1.08	0	14N
AT1G09780.1	2,3-biphosphoglycerate-independent phosphoglycerate mutase, putative / phosphoglyceromutase, putative	K.ALEYEDFDKFDR.V	2	1546.7	42.03	2.00426	1	1	0.9	1	2529363	2174929	1.16	0	15N
AT1G09780.1	2,3-biphosphoglycerate-independent phosphoglycerate mutase, putative / phosphoglyceromutase, putative	K.DLETPGLANVAATVMNLHGFVAPSDYEPTLIEVVE.-	3	3711.87	31.83	6.45281	1	1	0.89	1	5983975	5402750	1.11	0	14N
AT1G09780.1	2,3-biphosphoglycerate-independent phosphoglycerate mutase, putative / phosphoglyceromutase, putative	K.GIYVVTADHGNAEDMVKR.D	3	1973.98	27.8	2.63428	1	1	0.7	2	3563799	3601647	0.99	0	15N
AT1G09780.1	2,3-biphosphoglycerate-independent phosphoglycerate mutase, putative / phosphoglyceromutase, putative	K.LQILTSHTLKPVPIAIGGPGLAQGVR.F	3	2635.57	41.8	4.24957	1	1	0.98	1	6976407	4859971	1.44	0	14N
AT1G09780.1	2,3-biphosphoglycerate-independent phosphoglycerate mutase, putative / phosphoglyceromutase, putative	K.LQILTSHTLKPVPIAIGGPGLAQGVR.F	3	2635.57	47.11	3.22512	1	1	0.98	1	7256612	6136708	1.18	0	15N
AT1G09780.1	2,3-biphosphoglycerate-independent phosphoglycerate mutase, putative / phosphoglyceromutase, putative	K.MIFDAIEQVK.G	2	1192.63	24.09	8.46872	1	1	0.94	1	3903842	3576467	1.09	0	14N
AT1G09780.1	2,3-biphosphoglycerate-independent phosphoglycerate mutase, putative / phosphoglyceromutase, putative	K.MIFDAIEQVK.G	2	1192.63	39.39	7.37869	1	1	0.82	1	3329625	3699147	0.9	0	15N
AT1G09780.1	2,3-biphosphoglycerate-independent phosphoglycerate mutase, putative / phosphoglyceromutase, putative	K.RGWDAQVLGEAPHK.F	3	1562.81	21.29	3.32735	1	1	0.88	2	3145128	3155831	1	0	15N
AT1G09780.1	2,3-biphosphoglycerate-independent phosphoglycerate mutase, putative / phosphoglyceromutase, putative	K.TIAVIVLDGWGESAPDQYNCIHN*APTPAMDSLK.H	3	3583.76	49.48	15.2635	1	1	0.84	1	1625660	1293259	1.26	0	14N
AT1G09780.1	2,3-biphosphoglycerate-independent phosphoglycerate mutase, putative / phosphoglyceromutase, putative	K.TIAVIVLDGWGESAPDQYNCIHN*APTPAMDSLK.H	3	3583.75	51.85	11.4686	1	1	0.85	1	1473312	1466206	1	0	15N
AT1G09780.1	2,3-biphosphoglycerate-independent phosphoglycerate mutase, putative / phosphoglyceromutase, putative	K.YVSESFETNTLHLVGLLSDGGVHSR.L	3	2716.37	36.08	6.66334	1	1	0.94	1	1982833	1896760	1.05	0	14N
AT1G09780.1	2,3-biphosphoglycerate-independent phosphoglycerate mutase, putative / phosphoglyceromutase, putative	K.YVSESFETNTLHLVGLLSDGGVHSR.L	3	2717.39	46.52	10.7296	1	1	0.91	1	1852815	2394220	0.77	0	15N
AT1G09780.1	2,3-biphosphoglycerate-independent phosphoglycerate mutase, putative / phosphoglyceromutase, putative	R.GWDAQVLGEAPHK.F	3	1406.71	34.95	7.10883	1	1	0.93	2	5085912	4119345	1.23	0	14N
AT1G09780.1	2,3-biphosphoglycerate-independent phosphoglycerate mutase, putative / phosphoglyceromutase, putative	R.GWDAQVLGEAPHK.F	3	1406.71	27.7	3.6255	1	1	0.94	2	6785959	5623986	1.21	0	15N
AT1G09780.1	2,3-biphosphoglycerate-independent phosphoglycerate mutase, putative / phosphoglyceromutase, putative	R.LDQLQLLIK.G	2	1082.69	34.53	7.66618	1	1	0.92	1	2151787	1905788	1.13	0	14N
AT1G09780.1	2,3-biphosphoglycerate-independent phosphoglycerate mutase, putative / phosphoglyceromutase, putative	R.LDQLQLLIK.G	2	1082.68	40.81	3.32509	1	1	0.73	1	2111295	2346931	0.9	0	15N
AT1G09780.1	2,3-biphosphoglycerate-independent phosphoglycerate mutase, putative / phosphoglyceromutase, putative	R.MYVTLDRYENDWEVVKR.G	3	2215.09	26.87	4.28878	1	1	0.16	1	2586667	2069019	1.25	0	15N
AT1G09780.1	2,3-biphosphoglycerate-independent phosphoglycerate mutase, putative / phosphoglyceromutase, putative	R.TSGEYLTHN*GVSTFACSETVK.F	3	2288.05	29.96	5.4632	1	1	0.96	1	1224793	1175238	1.04	0	14N
AT1G09780.1	2,3-biphosphoglycerate-independent phosphoglycerate mutase, putative / phosphoglyceromutase, putative	R.TSGEYLTHN*GVSTFACSETVK.F	3	2288.05	29.26	4.80762	1	1	0.91	1	1474983	1401806	1.05	0	15N
AT1G10590.1	DNA-binding protein-related	K.VNELRPGTN*GHSLNVK.V	3	1734.91	46.51	3.22783	1	1	0.94	2	2015195	1524330	1.32	0	14N
AT1G10590.1	DNA-binding protein-related	K.VNELRPGTN*GHSLNVK.V	3	1734.91	36.68	3.34311	1	1	0.91	2	1281107	1480956	0.87	0	15N
AT1G11580.1	PMEPCRA (METHYLESTERASE PCR A); enzyme inhibitor/ pectinesterase	K.ITASSDLAPVKGSVK.T	2	1471.84	60.23	4.28038	1	1	0.92	1	1049813	934174	1.12	0	14N
AT1G11580.1	PMEPCRA (METHYLESTERASE PCR A); enzyme inhibitor/ pectinesterase	K.LIQGGLWLKPTGVTFQEWL.-	2	2185.22	28.11	8.78638	1	1	0.23	1	1911467	3257155	0.59	0	15N
AT1G11580.1	PMEPCRA (METHYLESTERASE PCR A); enzyme inhibitor/ pectinesterase	K.TVNEAVAAAPEN*SNTR.Y	2	1643.79	57.96	4.50181	1	1	0.96	1	494123	633936	0.78	0	14N
AT1G11580.1	PMEPCRA (METHYLESTERASE PCR A); enzyme inhibitor/ pectinesterase	K.TVNEAVAAAPEN*SNTR.Y	2	1643.79	55.52	4.07596	1	1	0.73	1	567923	739988	0.77	0	15N
AT1G11580.1	PMEPCRA (METHYLESTERASE PCR A); enzyme inhibitor/ pectinesterase	K.TVNEAVAAAPENSNTR.Y	2	1642.81	50.56	5.84369	1	1	0.94	1	2972214	3071813	0.97	0	14N
AT1G11580.1	PMEPCRA (METHYLESTERASE PCR A); enzyme inhibitor/ pectinesterase	K.TVNEAVAAAPENSNTR.Y	2	1642.81	45.52	5.66107	1	1	0.97	1	2018498	1340346	1.51	0	15N
AT1G11580.1	PMEPCRA (METHYLESTERASE PCR A); enzyme inhibitor/ pectinesterase	R.EDQNQNTAISIQK.C	2	1487.74	35.69	6.78887	1	1	0.89	1	525874	582079	0.9	0	14N
AT1G11580.1	PMEPCRA (METHYLESTERASE PCR A); enzyme inhibitor/ pectinesterase	R.EDQNQNTAISIQK.C	2	1487.74	35.83	4.50351	1	1	0.92	1	601222	604464	0.99	0	15N
AT1G11580.1	PMEPCRA (METHYLESTERASE PCR A); enzyme inhibitor/ pectinesterase	R.SATVAAN*GDGFMAQDIWFQNTAGPAK.H	2	2668.26	32.27	10.7187	1	1	0.89	1	1132371	914381	1.24	0	15N
AT1G11840.2	ATGLX1 (GLYOXALASE I HOMOLOG); lactoylglutathione lyase/ metal ion binding	K.IVSFLDPDGWK.T	2	1275.67	36.35	9.32852	1	1	0.95	1	6737563	3739794	1.8	0	14N
AT1G11840.2	ATGLX1 (GLYOXALASE I HOMOLOG); lactoylglutathione lyase/ metal ion binding	K.IVSFLDPDGWK.T	2	1275.67	40.67	9.25013	1	1	0.97	1	4335049	4174320	1.04	0	15N
AT1G11840.2	ATGLX1 (GLYOXALASE I HOMOLOG); lactoylglutathione lyase/ metal ion binding	K.TVLVDNKDFLKELE.-	2	1661.9	32.49	5.11464	1	1	0.91	1	4946451	3009896	1.64	0	14N
AT1G11840.2	ATGLX1 (GLYOXALASE I HOMOLOG); lactoylglutathione lyase/ metal ion binding	R.GPTPEPFCQVMLR.V	2	1530.75	36.14	6.01016	1	1	0.97	2	7729756	4485737	1.72	0	14N
AT1G11840.2	ATGLX1 (GLYOXALASE I HOMOLOG); lactoylglutathione lyase/ metal ion binding	R.GPTPEPFCQVMLR.V	2	1530.76	33.45	10.8444	1	1	0.94	2	5481068	5465997	1	0	15N
AT1G11910.1	aspartyl protease family protein	K.QGLIKEPVFSFWLNR.N	3	1833.03	32.08	12.7659	1	1	0.89	1	1398085	1218573	1.15	0	14N
AT1G11910.1	aspartyl protease family protein	K.QGLIKEPVFSFWLNR.N	3	1833.02	28.3	9.21985	1	1	0.83	1	917944	925687	0.99	0	15N
AT1G11910.1	aspartyl protease family protein	K.TVVDQYGQTILDLLLSETQPK.K	2	2360.26	70.56	2.5421	3	3	0.93	1	2223345	1974501	1.31667	0.161658	14N
AT1G11910.1	aspartyl protease family protein	K.TVVDQYGQTILDLLLSETQPK.K	2	2361.29	89.92	13.0263	3	3	0.9	1	10905175	11005115	0.953333	0.0635085	15N
AT1G11910.1	aspartyl protease family protein	R.ILNYVNELCER.L	2	1421.71	44.88	5.41603	1	1	0.9	1	4151362	2419806	1.72	0	14N
AT1G11910.1	aspartyl protease family protein	R.ILNYVNELCER.L	2	1421.71	49.28	6.75246	1	1	0.85	1	3395199	4349972	0.78	0	15N
AT1G11910.1	aspartyl protease family protein	R.NADEEEGGELVFGGVDPNHFK.G	2	2259.02	43.63	1.68215	1	1	0.92	1	1464426	889706	1.65	0	14N
AT1G11910.1	aspartyl protease family protein	R.NADEEEGGELVFGGVDPNHFK.G	3	2259.02	23.52	0.664006	1	1	0.88	1	2335825	2205703	1.06	0	15N
AT1G12000.1	pyrophosphate--fructose-6-phosphate 1-phosphotransferase beta subunit, putative / pyrophosphate-dependent 6-phosphofructose-1-kinase, putative	K.IVEGPASSAAGNPDEIAK.L	2	1724.87	83.96	4.34816	1	1	0.97	1	11420912	11099624	1.03	0	14N
AT1G12000.1	pyrophosphate--fructose-6-phosphate 1-phosphotransferase beta subunit, putative / pyrophosphate-dependent 6-phosphofructose-1-kinase, putative	K.IVEGPASSAAGNPDEIAK.L	2	1724.87	95.87	3.47853	1	1	0.98	1	14897918	13851258	1.08	0	15N
AT1G12000.1	pyrophosphate--fructose-6-phosphate 1-phosphotransferase beta subunit, putative / pyrophosphate-dependent 6-phosphofructose-1-kinase, putative	K.LFPGLYGQPSVAVVPDQDAPSSAPK.L	2	2539.33	23.17	8.62441	1	1	0.91	1	2435199	2270117	1.07	0	15N
AT1G12000.1	pyrophosphate--fructose-6-phosphate 1-phosphotransferase beta subunit, putative / pyrophosphate-dependent 6-phosphofructose-1-kinase, putative	R.DLTAVGSPENAPAK.G	2	1368.7	66.91	5.26048	1	1	0.92	1	4550280	3885832	1.17	0	14N
AT1G12000.1	pyrophosphate--fructose-6-phosphate 1-phosphotransferase beta subunit, putative / pyrophosphate-dependent 6-phosphofructose-1-kinase, putative	R.DLTAVGSPENAPAK.G	2	1368.7	81.4	5.84498	1	1	0.93	1	3517250	3106745	1.13	0	15N
AT1G12310.1	calmodulin, putative	K.SIIASENLSSPFDFNR.F	2	1795.91	33.46	13.698	1	1	0.89	1	1314536	1441550	0.91	0	14N
AT1G12310.1	calmodulin, putative	K.SIIASENLSSPFDFNR.F	2	1795.89	38.95	6.57059	1	1	0.81	1	1812768	1872184	0.97	0	15N
AT1G12840.1	DET3 (DE-ETIOLATED 3); proton-transporting ATPase, rotational mechanism	R.DLSNLVKPEDIVESEHLVTLLAVVPK.Y	3	2856.63	25.67	14.7378	1	1	0.81	1	3329956	3831718	0.87	0	15N
AT1G12840.1	DET3 (DE-ETIOLATED 3); proton-transporting ATPase, rotational mechanism	R.VGTLDSLLALGDDLLK.S	2	1641.94	72.01	10.78	1	1	0.85	1	1283276	1458881	0.88	0	14N
AT1G12840.1	DET3 (DE-ETIOLATED 3); proton-transporting ATPase, rotational mechanism	R.VGTLDSLLALGDDLLK.S	2	1641.94	67.22	5.90769	1	1	0.84	1	1817317	1859273	0.98	0	15N
AT1G13060.1	PBE1; endopeptidase/ peptidase/ threonine-type endopeptidase	K.LLANMLYSYR.G	2	1242.66	66.46	4.50649	1	1	0.82	2	2930083	3201657	0.92	0	14N
AT1G13060.1	PBE1; endopeptidase/ peptidase/ threonine-type endopeptidase	K.LLANMLYSYR.G	2	1242.66	70.81	5.79406	1	1	0.94	2	1552422	1755864	0.88	0	15N
AT1G13060.1	PBE1; endopeptidase/ peptidase/ threonine-type endopeptidase	K.LSGDDVGELHYHYYPVAPATAEQVMEEATAE.-	3	3391.55	35.58	6.51624	2	2	0.88	1	3353394	2446197	1.37	0	14N
AT1G13060.1	PBE1; endopeptidase/ peptidase/ threonine-type endopeptidase	K.LSGDDVGELHYHYYPVAPATAEQVMEEATAE.-	3	3391.55	31.21	5.77911	2	2	0.94	1	3158660	2550517	1.24	0	15N
AT1G13060.1	PBE1; endopeptidase/ peptidase/ threonine-type endopeptidase	R.ASMGGYISSQSVK.K	2	1313.65	62.87	10.1246	1	1	0.97	2	1931498	1524195	1.27	0	14N
AT1G13060.1	PBE1; endopeptidase/ peptidase/ threonine-type endopeptidase	R.ASMGGYISSQSVK.K	2	1313.65	79.18	12.8651	1	1	0.86	2	1826140	1601407	1.14	0	15N
AT1G13420.1	ST4B (SULFOTRANSFERASE 4B); brassinosteroid sulfotransferase/ sulfotransferase	R.NLKEEEEEEEEN*QSEETK.S	3	2222.93	29.93	-0.179943	1	1	0.94	1	425145	596137	0.71	0	14N
AT1G13440.1	GAPC2 (GLYCERALDEHYDE-3-PHOSPHATE DEHYDROGENASE C2); NAD or NADH binding / binding / catalytic/ glyceraldehyde-3-phosphate dehydrogenase (phosphorylating)/ glyceraldehyde-3-phosphate dehydrogenase	K.AGIALSDKFVK.L	3	1147.68	56.04	7.92912	2	2	0.98	3	10968134	8602863	1.19	0.113137	14N
AT1G13440.1	GAPC2 (GLYCERALDEHYDE-3-PHOSPHATE DEHYDROGENASE C2); NAD or NADH binding / binding / catalytic/ glyceraldehyde-3-phosphate dehydrogenase (phosphorylating)/ glyceraldehyde-3-phosphate dehydrogenase	K.AGIALSDKFVK.L	3	1147.68	43.51	6.97066	2	2	0.98	3	10620625	10954478	0.975	0.00707107	15N
AT1G13440.1	GAPC2 (GLYCERALDEHYDE-3-PHOSPHATE DEHYDROGENASE C2); NAD or NADH binding / binding / catalytic/ glyceraldehyde-3-phosphate dehydrogenase (phosphorylating)/ glyceraldehyde-3-phosphate dehydrogenase	K.DAPMFVVGVNEHEYKSDLDIVSNASCTTNCLAPLAK.V	3	3964.89	23.57	5.17041	1	1	0.95	2	3301827	2775817	1.19	0	14N
AT1G13440.1	GAPC2 (GLYCERALDEHYDE-3-PHOSPHATE DEHYDROGENASE C2); NAD or NADH binding / binding / catalytic/ glyceraldehyde-3-phosphate dehydrogenase (phosphorylating)/ glyceraldehyde-3-phosphate dehydrogenase	K.GILGYTEDDVVSTDFVGDNR.S	2	2171.03	100.47	8.6135	4	4	0.8	3	7474165	6322985	1.2025	0.0330404	14N
AT1G13440.1	GAPC2 (GLYCERALDEHYDE-3-PHOSPHATE DEHYDROGENASE C2); NAD or NADH binding / binding / catalytic/ glyceraldehyde-3-phosphate dehydrogenase (phosphorylating)/ glyceraldehyde-3-phosphate dehydrogenase	K.GILGYTEDDVVSTDFVGDNR.S	2	2171.03	113.73	8.06077	4	4	0.82	3	2780267	2184134	1.1325	0.0921502	15N
AT1G13440.1	GAPC2 (GLYCERALDEHYDE-3-PHOSPHATE DEHYDROGENASE C2); NAD or NADH binding / binding / catalytic/ glyceraldehyde-3-phosphate dehydrogenase (phosphorylating)/ glyceraldehyde-3-phosphate dehydrogenase	K.KVVISAPSKDAPMFVVGVNEHEYK.S	3	2643.4	48.96	6.88512	1	1	0.95	2	2778408	2296551	1.21	0	14N
AT1G13440.1	GAPC2 (GLYCERALDEHYDE-3-PHOSPHATE DEHYDROGENASE C2); NAD or NADH binding / binding / catalytic/ glyceraldehyde-3-phosphate dehydrogenase (phosphorylating)/ glyceraldehyde-3-phosphate dehydrogenase	K.KVVISAPSKDAPMFVVGVNEHEYK.S	3	2643.39	50.08	3.21558	1	1	0.94	2	3460462	3756352	0.92	0	15N
AT1G13440.1	GAPC2 (GLYCERALDEHYDE-3-PHOSPHATE DEHYDROGENASE C2); NAD or NADH binding / binding / catalytic/ glyceraldehyde-3-phosphate dehydrogenase (phosphorylating)/ glyceraldehyde-3-phosphate dehydrogenase	K.LVSWYDN*EWGYSSR.V	2	1761.79	36.47	12.4874	1	1	0.55	3	20318344	22422369	0.91	0	14N
AT1G13440.1	GAPC2 (GLYCERALDEHYDE-3-PHOSPHATE DEHYDROGENASE C2); NAD or NADH binding / binding / catalytic/ glyceraldehyde-3-phosphate dehydrogenase (phosphorylating)/ glyceraldehyde-3-phosphate dehydrogenase	K.LVSWYDNEWGYSSR.V	2	1760.79	73.12	4.25946	2	2	0.96	3	25394108	18837262	1.35	0	14N
AT1G13440.1	GAPC2 (GLYCERALDEHYDE-3-PHOSPHATE DEHYDROGENASE C2); NAD or NADH binding / binding / catalytic/ glyceraldehyde-3-phosphate dehydrogenase (phosphorylating)/ glyceraldehyde-3-phosphate dehydrogenase	K.LVSWYDNEWGYSSR.V	2	1760.8	69.72	5.73607	2	2	0.89	3	23254936	21353450	1.09	0	15N
AT1G13440.1	GAPC2 (GLYCERALDEHYDE-3-PHOSPHATE DEHYDROGENASE C2); NAD or NADH binding / binding / catalytic/ glyceraldehyde-3-phosphate dehydrogenase (phosphorylating)/ glyceraldehyde-3-phosphate dehydrogenase	K.SDLDIVSNASCTTNCLAPLAK.V	2	2249.09	71.97	5.51338	2	2	0.88	2	4708360	2712991	1.74	0	14N
AT1G13440.1	GAPC2 (GLYCERALDEHYDE-3-PHOSPHATE DEHYDROGENASE C2); NAD or NADH binding / binding / catalytic/ glyceraldehyde-3-phosphate dehydrogenase (phosphorylating)/ glyceraldehyde-3-phosphate dehydrogenase	K.SDLDIVSNASCTTNCLAPLAK.V	2	2249.09	78.47	4.75751	2	2	0.91	2	6434348	5214603	1.515	0.403051	15N
AT1G13440.1	GAPC2 (GLYCERALDEHYDE-3-PHOSPHATE DEHYDROGENASE C2); NAD or NADH binding / binding / catalytic/ glyceraldehyde-3-phosphate dehydrogenase (phosphorylating)/ glyceraldehyde-3-phosphate dehydrogenase	K.TLLFGEKPVTVFGIR.N	3	1675.99	58.33	8.17435	4	4	0.98	3	14401485	10986684	1.215	0.109697	14N
AT1G13440.1	GAPC2 (GLYCERALDEHYDE-3-PHOSPHATE DEHYDROGENASE C2); NAD or NADH binding / binding / catalytic/ glyceraldehyde-3-phosphate dehydrogenase (phosphorylating)/ glyceraldehyde-3-phosphate dehydrogenase	K.TLLFGEKPVTVFGIR.N	3	1675.99	52.82	7.63735	5	5	0.96	3	22646971	20812496	1.026	0.0876356	15N
AT1G13440.1	GAPC2 (GLYCERALDEHYDE-3-PHOSPHATE DEHYDROGENASE C2); NAD or NADH binding / binding / catalytic/ glyceraldehyde-3-phosphate dehydrogenase (phosphorylating)/ glyceraldehyde-3-phosphate dehydrogenase	K.VIN*DRFGIVEGLMTTVHSITATQK.T	3	2630.42	25.02	14.3705	1	1	0.86	2	2077011	2282695	0.91	0	14N
AT1G13440.1	GAPC2 (GLYCERALDEHYDE-3-PHOSPHATE DEHYDROGENASE C2); NAD or NADH binding / binding / catalytic/ glyceraldehyde-3-phosphate dehydrogenase (phosphorylating)/ glyceraldehyde-3-phosphate dehydrogenase	K.VINDRFGIVEGLMTTVHSITATQ*K.T	4	2630.42	27.68	14.1044	1	1	0.87	2	918548	1100192	0.83	0	15N
AT1G13440.1	GAPC2 (GLYCERALDEHYDE-3-PHOSPHATE DEHYDROGENASE C2); NAD or NADH binding / binding / catalytic/ glyceraldehyde-3-phosphate dehydrogenase (phosphorylating)/ glyceraldehyde-3-phosphate dehydrogenase	K.VINDRFGIVEGLMTTVHSITATQK.T	4	2630.42	25.49	6.74885	1	1	0.81	2	2175676	2255715	0.96	0	14N
AT1G13440.1	GAPC2 (GLYCERALDEHYDE-3-PHOSPHATE DEHYDROGENASE C2); NAD or NADH binding / binding / catalytic/ glyceraldehyde-3-phosphate dehydrogenase (phosphorylating)/ glyceraldehyde-3-phosphate dehydrogenase	K.VKDDKTLLFGEKPVTVFGIR.N	4	2261.3	40.29	8.26963	2	2	0.95	2	8536796	6791698	1.155	0.148492	14N
AT1G13440.1	GAPC2 (GLYCERALDEHYDE-3-PHOSPHATE DEHYDROGENASE C2); NAD or NADH binding / binding / catalytic/ glyceraldehyde-3-phosphate dehydrogenase (phosphorylating)/ glyceraldehyde-3-phosphate dehydrogenase	K.VKDDKTLLFGEKPVTVFGIR.N	4	2261.3	35.19	8.04852	2	2	0.89	2	3486981	2908052	1.025	0.247487	15N
AT1G13440.1	GAPC2 (GLYCERALDEHYDE-3-PHOSPHATE DEHYDROGENASE C2); NAD or NADH binding / binding / catalytic/ glyceraldehyde-3-phosphate dehydrogenase (phosphorylating)/ glyceraldehyde-3-phosphate dehydrogenase	K.VLPSLN*GKLTGMSFR.V	3	1619.89	21.54	8.14876	1	1	0.96	2	7128138	5066233	1.41	0	14N
AT1G13440.1	GAPC2 (GLYCERALDEHYDE-3-PHOSPHATE DEHYDROGENASE C2); NAD or NADH binding / binding / catalytic/ glyceraldehyde-3-phosphate dehydrogenase (phosphorylating)/ glyceraldehyde-3-phosphate dehydrogenase	K.VVISAPSKDAPMFVVGVNEHEYK.S	3	2515.3	37.02	5.88402	1	1	0.91	2	2180093	1858731	1.17	0	14N
AT1G13440.1	GAPC2 (GLYCERALDEHYDE-3-PHOSPHATE DEHYDROGENASE C2); NAD or NADH binding / binding / catalytic/ glyceraldehyde-3-phosphate dehydrogenase (phosphorylating)/ glyceraldehyde-3-phosphate dehydrogenase	K.VVISAPSKDAPMFVVGVNEHEYK.S	3	2515.31	28.25	7.7526	1	1	0.89	2	2684190	2819756	0.95	0	15N
AT1G13440.1	GAPC2 (GLYCERALDEHYDE-3-PHOSPHATE DEHYDROGENASE C2); NAD or NADH binding / binding / catalytic/ glyceraldehyde-3-phosphate dehydrogenase (phosphorylating)/ glyceraldehyde-3-phosphate dehydrogenase	K.YDSVHGQWK.H	3	1118.53	24.13	6.79468	1	1	0.94	3	1590209	1246221	1.28	0	14N
AT1G13440.1	GAPC2 (GLYCERALDEHYDE-3-PHOSPHATE DEHYDROGENASE C2); NAD or NADH binding / binding / catalytic/ glyceraldehyde-3-phosphate dehydrogenase (phosphorylating)/ glyceraldehyde-3-phosphate dehydrogenase	R.AASFNIIPSSTGAAK.A	2	1433.77	45.52	5.85872	4	4	0.98	3	182422228	172395317	1.06	0	14N
AT1G13440.1	GAPC2 (GLYCERALDEHYDE-3-PHOSPHATE DEHYDROGENASE C2); NAD or NADH binding / binding / catalytic/ glyceraldehyde-3-phosphate dehydrogenase (phosphorylating)/ glyceraldehyde-3-phosphate dehydrogenase	R.AASFNIIPSSTGAAK.A	2	1433.77	60.62	5.78898	3	3	0.93	3	193203438	212734139	0.91	0	15N
AT1G13440.1	GAPC2 (GLYCERALDEHYDE-3-PHOSPHATE DEHYDROGENASE C2); NAD or NADH binding / binding / catalytic/ glyceraldehyde-3-phosphate dehydrogenase (phosphorylating)/ glyceraldehyde-3-phosphate dehydrogenase	R.DDVELVAVNDPFITTEYMTYMFK.Y	2	2740.28	56.26	4.19666	3	3	0.76	3	6380648	5068498	1.20667	0.092376	14N
AT1G13440.1	GAPC2 (GLYCERALDEHYDE-3-PHOSPHATE DEHYDROGENASE C2); NAD or NADH binding / binding / catalytic/ glyceraldehyde-3-phosphate dehydrogenase (phosphorylating)/ glyceraldehyde-3-phosphate dehydrogenase	R.DDVELVAVNDPFITTEYMTYMFK.Y	2	2740.29	59.68	7.59048	3	3	0.81	3	8290638	7480303	1.11	0	15N
AT1G13440.1	GAPC2 (GLYCERALDEHYDE-3-PHOSPHATE DEHYDROGENASE C2); NAD or NADH binding / binding / catalytic/ glyceraldehyde-3-phosphate dehydrogenase (phosphorylating)/ glyceraldehyde-3-phosphate dehydrogenase	R.FGIVEGLM#TTVHSITATQ*K.T	3	2049.08	29.5	11.1759	1	1	0.52	3	3842351	3135957	1.23	0	14N
AT1G13440.1	GAPC2 (GLYCERALDEHYDE-3-PHOSPHATE DEHYDROGENASE C2); NAD or NADH binding / binding / catalytic/ glyceraldehyde-3-phosphate dehydrogenase (phosphorylating)/ glyceraldehyde-3-phosphate dehydrogenase	R.FGIVEGLM#TTVHSITATQK.T	3	2049.08	44.99	1.73109	1	1	0.63	3	1636895	1759632	0.93	0	15N
AT1G13440.1	GAPC2 (GLYCERALDEHYDE-3-PHOSPHATE DEHYDROGENASE C2); NAD or NADH binding / binding / catalytic/ glyceraldehyde-3-phosphate dehydrogenase (phosphorylating)/ glyceraldehyde-3-phosphate dehydrogenase	R.FGIVEGLMTTVHSITATQK.T	2	2032.09	80.41	7.33241	8	8	0.98	3	11783934	11022074	1.085	0.0465986	14N
AT1G13440.1	GAPC2 (GLYCERALDEHYDE-3-PHOSPHATE DEHYDROGENASE C2); NAD or NADH binding / binding / catalytic/ glyceraldehyde-3-phosphate dehydrogenase (phosphorylating)/ glyceraldehyde-3-phosphate dehydrogenase	R.FGIVEGLMTTVHSITATQK.T	2	2032.09	81.48	7.52925	9	9	0.86	3	80635741	89184501	0.91	0.0308221	15N
AT1G13440.1	GAPC2 (GLYCERALDEHYDE-3-PHOSPHATE DEHYDROGENASE C2); NAD or NADH binding / binding / catalytic/ glyceraldehyde-3-phosphate dehydrogenase (phosphorylating)/ glyceraldehyde-3-phosphate dehydrogenase	R.IGIN*GFGR.I	2	833.453	43.45	6.71908	2	2	0.95	3	6063311	4274506	1.435	0.0212132	14N
AT1G13440.1	GAPC2 (GLYCERALDEHYDE-3-PHOSPHATE DEHYDROGENASE C2); NAD or NADH binding / binding / catalytic/ glyceraldehyde-3-phosphate dehydrogenase (phosphorylating)/ glyceraldehyde-3-phosphate dehydrogenase	R.IGIN*GFGR.I	2	833.452	37.81	5.99918	2	2	0.92	3	1773742	2013929	1.015	0.190919	15N
AT1G13440.1	GAPC2 (GLYCERALDEHYDE-3-PHOSPHATE DEHYDROGENASE C2); NAD or NADH binding / binding / catalytic/ glyceraldehyde-3-phosphate dehydrogenase (phosphorylating)/ glyceraldehyde-3-phosphate dehydrogenase	R.VPTVDVSVVDLTVR.L	2	1497.86	93.44	6.27567	2	2	0.85	3	20166410	14442999	1.4	0	14N
AT1G13440.1	GAPC2 (GLYCERALDEHYDE-3-PHOSPHATE DEHYDROGENASE C2); NAD or NADH binding / binding / catalytic/ glyceraldehyde-3-phosphate dehydrogenase (phosphorylating)/ glyceraldehyde-3-phosphate dehydrogenase	R.VPTVDVSVVDLTVR.L	2	1497.86	84.4	5.54128	3	3	0.85	3	25298133	22129225	1.13667	0.0057735	15N
AT1G13440.1	GAPC2 (GLYCERALDEHYDE-3-PHOSPHATE DEHYDROGENASE C2); NAD or NADH binding / binding / catalytic/ glyceraldehyde-3-phosphate dehydrogenase (phosphorylating)/ glyceraldehyde-3-phosphate dehydrogenase	R.VPTVDVSVVDLTVRLEK.A	2	1868.08	71.43	7.01259	1	1	0.87	3	1162639	1296414	0.9	0	14N
AT1G13440.1	GAPC2 (GLYCERALDEHYDE-3-PHOSPHATE DEHYDROGENASE C2); NAD or NADH binding / binding / catalytic/ glyceraldehyde-3-phosphate dehydrogenase (phosphorylating)/ glyceraldehyde-3-phosphate dehydrogenase	R.VVDLIVHMSK.A	2	1139.65	53.27	5.17705	2	2	0.98	3	7942310	7912036	1.085	0.120208	14N
AT1G13440.1	GAPC2 (GLYCERALDEHYDE-3-PHOSPHATE DEHYDROGENASE C2); NAD or NADH binding / binding / catalytic/ glyceraldehyde-3-phosphate dehydrogenase (phosphorylating)/ glyceraldehyde-3-phosphate dehydrogenase	R.VVDLIVHMSK.A	3	1139.65	29.31	5.87902	1	1	0.98	3	21494928	20266197	1.06	0	15N
AT1G13440.1	GAPC2 (GLYCERALDEHYDE-3-PHOSPHATE DEHYDROGENASE C2); NAD or NADH binding / binding / catalytic/ glyceraldehyde-3-phosphate dehydrogenase (phosphorylating)/ glyceraldehyde-3-phosphate dehydrogenase	R.VVDLIVHMSKA.-	2	1210.69	37.73	3.79951	2	2	0.99	3	4673693	2258025	1.62	0.636396	14N
AT1G13440.1	GAPC2 (GLYCERALDEHYDE-3-PHOSPHATE DEHYDROGENASE C2); NAD or NADH binding / binding / catalytic/ glyceraldehyde-3-phosphate dehydrogenase (phosphorylating)/ glyceraldehyde-3-phosphate dehydrogenase	R.VVDLIVHMSKA.-	3	1210.69	24.96	7.59902	1	1	0.82	3	8117340	8165744	0.99	0	15N
AT1G13440.1	GAPC2 (GLYCERALDEHYDE-3-PHOSPHATE DEHYDROGENASE C2); NAD or NADH binding / binding / catalytic/ glyceraldehyde-3-phosphate dehydrogenase (phosphorylating)/ glyceraldehyde-3-phosphate dehydrogenase	R.VVLQ*RDDVELVAVNDPFITTEYMTYMFK.Y	4	3336.67	22.32	10.1	1	1	0.67	3	3380896	3947037	0.86	0	15N
AT1G13440.1	GAPC2 (GLYCERALDEHYDE-3-PHOSPHATE DEHYDROGENASE C2); NAD or NADH binding / binding / catalytic/ glyceraldehyde-3-phosphate dehydrogenase (phosphorylating)/ glyceraldehyde-3-phosphate dehydrogenase	R.VVLQRDDVELVAVNDPFITTEYMTYMFK.Y	4	3335.68	29.12	7.49478	1	1	0.84	3	4917395	4251519	1.16	0	14N
AT1G13440.1	GAPC2 (GLYCERALDEHYDE-3-PHOSPHATE DEHYDROGENASE C2); NAD or NADH binding / binding / catalytic/ glyceraldehyde-3-phosphate dehydrogenase (phosphorylating)/ glyceraldehyde-3-phosphate dehydrogenase	R.VVLQRDDVELVAVNDPFITTEYMTYMFK.Y	4	3335.7	25.53	12.861	1	1	0.74	3	3819743	3700997	1.03	0	15N
AT1G13730.1	nuclear transport factor 2 (NTF2) family protein / RNA recognition motif (RRM)-containing protein	K.TQEDNVVN*DKSNGVDAPK.K	3	1929.9	33.71	2.07265	1	1	0.81	1	251509	309304	0.81	0	14N
AT1G13930.1	Involved in response to salt stress. Knockout mutants are hypersensitive to salt stress.	K.VVAEAAQAAAR.N	2	1055.58	49.41	2.36837	1	1	0.88	1	114242	62256	1.84	0	14N
AT1G13930.1	Involved in response to salt stress. Knockout mutants are hypersensitive to salt stress.	K.VVAEAAQAAAR.N	2	1055.58	22.01	4.35779	1	1	0.72	1	76514	116632	0.66	0	15N
AT1G14610.1	TWN2 (TWIN 2); ATP binding / aminoacyl-tRNA ligase/ nucleotide binding / valine-tRNA ligase	R.LLHPFMPFVTEELWQR.L	3	2042.06	31.07	3.47689	1	1	0.8	1	660793	984706	0.67	0	15N
AT1G14670.1	endomembrane protein 70, putative	K.VGPFHNPSETYR.Y	3	1402.68	21.34	6.98667	1	1	0.67	3	3627225	5541899	0.65	0	14N
AT1G14810.1	semialdehyde dehydrogenase family protein	R.AHAESVNLQFENPLDENTAR.E	3	2254.09	38.58	8.11865	1	1	0.9	1	2331638	1992598	1.17	0	14N
AT1G14810.1	semialdehyde dehydrogenase family protein	R.AHAESVNLQFENPLDENTAR.E	3	2254.09	36.6	7.23137	1	1	0.88	1	1706943	1684392	1.01	0	15N
AT1G14810.1	semialdehyde dehydrogenase family protein	R.MVDGVPLVIPEVNPEAMK.G	2	1937.03	24.62	12.7516	1	1	0.91	1	2211069	2919700	0.76	0	15N
[truncated: 4,050 more rows]

## Sheet: Trial 3
Locus	Name	Sequence	Charge	ObsMass	Score	error(ppm)	numID	numQuant	bestCorr	numOccurInProteome	14N Peak Area	15N Peak Area	aveRatio(linear) (N14/N15 areas)	sdRatio(linear)	WT Label
[truncated: 5,344 more rows]
